# Supplementary material for: Chromosome-scale assembly reveals asymmetric paleo-subgenome evolution and targets for the acceleration of fungal resistance breeding in the nut crop, pecan
Source: PubMed Central journal article supplement — Plant Commun. 2021 Sep 24;2(6):100247. doi: 10.1016/j.xplc.2021.100247 (PMC8577110; doi:10.1016/j.xplc.2021.100247), 2021-09-24
Supplement: mmc1.pdf [file mmc1.pdf]

**Plant Communications, Volume 2**

**Supplemental information**

**Chromosome-scale assembly reveals asymmetric paleo-subgenome evolution and targets for the acceleration of fungal resistance breeding in the nut crop, pecan**

**Lihong Xiao, Mengjun Yu, Ying Zhang, Jie Hu, Rui Zhang, Jianhua Wang, Haobing Guo, He Zhang, Xinyu Guo, Tianquan Deng, Saibin Lv, Xuan Li, Jianqin Huang, and Guangyi Fan**

1 **Title: Chromosome-scale assembly reveals the asymmetric paleo-subgenomes evolution**  
2 **and targets for accelerating fungal resistance breeding in nut crop, pecan**

3 **Authors:** Lihong Xiao<sup>1,4,\*</sup>, Mengjun Yu<sup>2,4</sup>, Ying Zhang<sup>1,4</sup>, Jie Hu<sup>2</sup>, Rui Zhang<sup>2</sup>, Jianhua  
4 Wang<sup>1</sup>, Haobing Guo<sup>2</sup>, He Zhang<sup>2</sup>, Xinyu Guo<sup>2</sup>, Tianquan Deng<sup>3</sup>, Saibin Lv<sup>1</sup>, Xuan Li<sup>1</sup>,  
5 Jianqin Huang<sup>1</sup>, Guangyi Fan<sup>2,\*</sup>

6 **Affiliations:**

7 <sup>1</sup> State Key Laboratory of Subtropical Silviculture, Zhejiang A&F University, Hangzhou  
8 311300, China

9 <sup>2</sup> BGI-Qingdao, BGI-Shenzhen, Qingdao 266555, China

10 <sup>3</sup> BGI Genomics, BGI-Shenzhen, Shenzhen 518083, China

11 <sup>4</sup> Co-first authors

12 \* Corresponding authors

13 **Correspondence:**

14 Lihong Xiao, Ph.D.

15 Tel. +86 0571-61083202

16 Email: xiaohl@zafu.edu.cn

17 Address: No. 666 Wusu St. Lin'an District, Hangzhou 311300, China

18 Guangyi Fan, Ph.D.

19 Tel. + 86 18576694373

20 Email: fanguangyi@genomics.cn

21 Address: No. 2 Hengyunshan Rd. Huangdao District, Qingdao 266000, China

22 **Running title:** The chromosome-level genome of pecan

23 **Short summary:**

24 A high-quality chromosome-scale reference genome of pecan reveals two paleo-subgenomes  
25 with asymmetry in their features and evolution. Re-sequencing on pecan scab-associated core  
26 accessions identifies several key genes in chitin response pathway that may be important  
27 susceptibility factors for fungal diseases and valuable resources for pecan breeders. The study  
28 provides an example for production and quality improvement of tree nut crops.

29 **Supplemental Information (SI)**

30 **Supplemental Figures and legends**

31 **Figure S1. Distribution of Nanopore reads.**

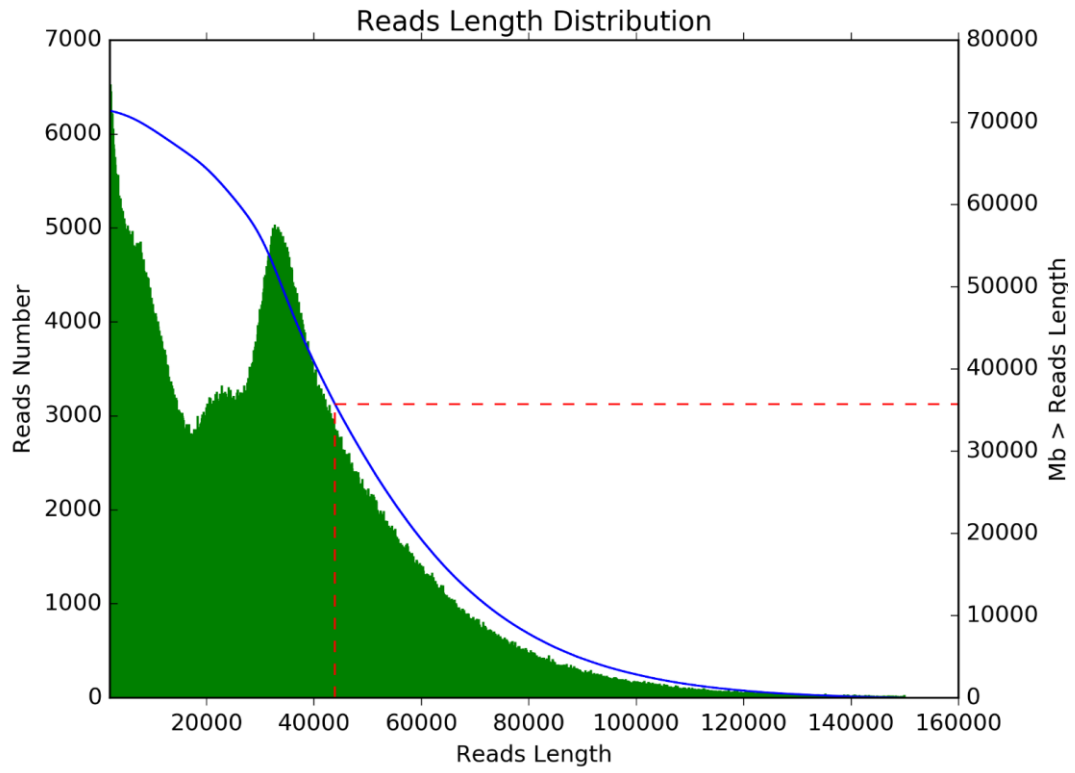

32

33 Figure S2. Genome survey by K-mer analysis.

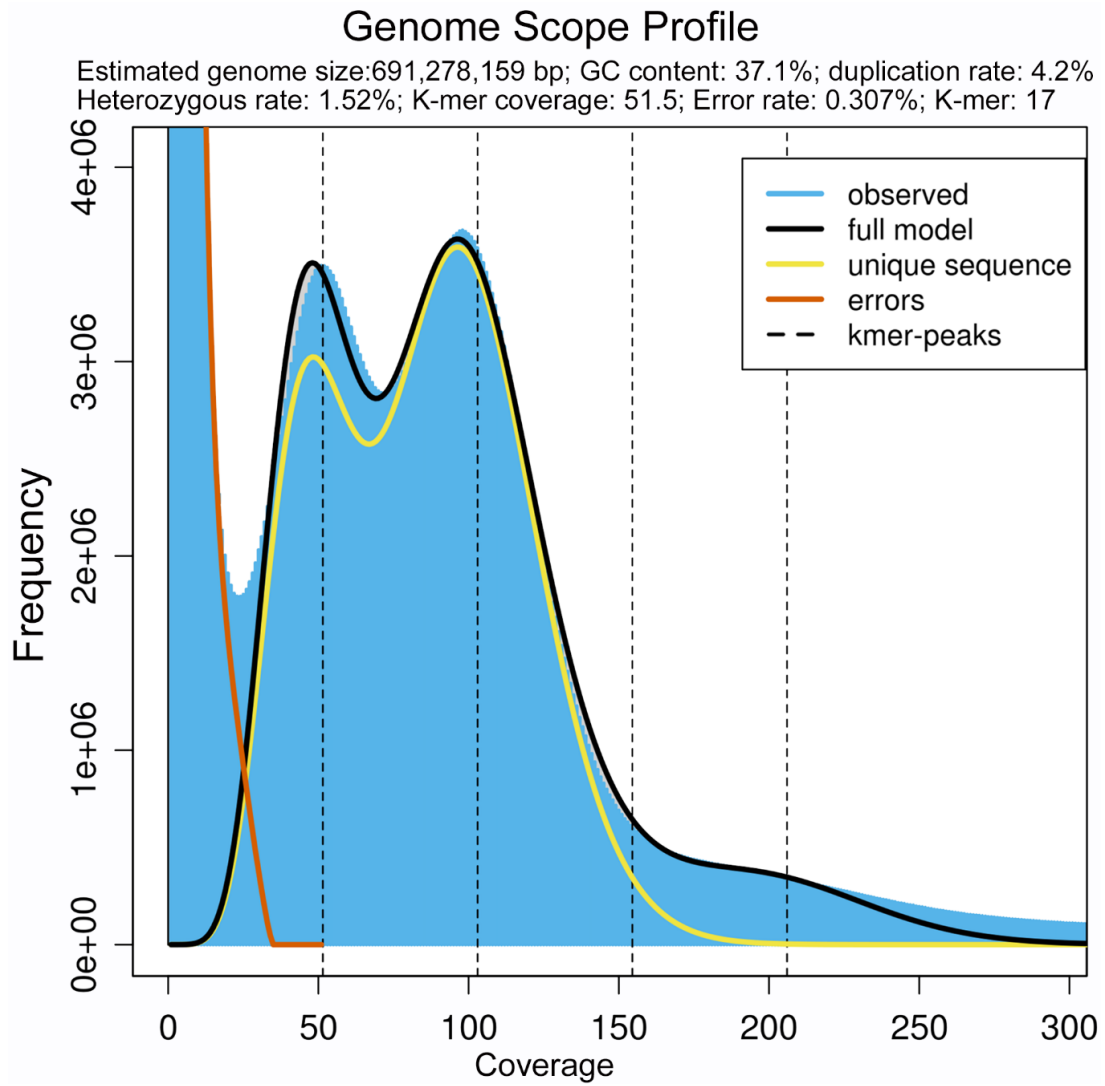

34

35 Figure S3. Heatmap of Hi-C assembly.

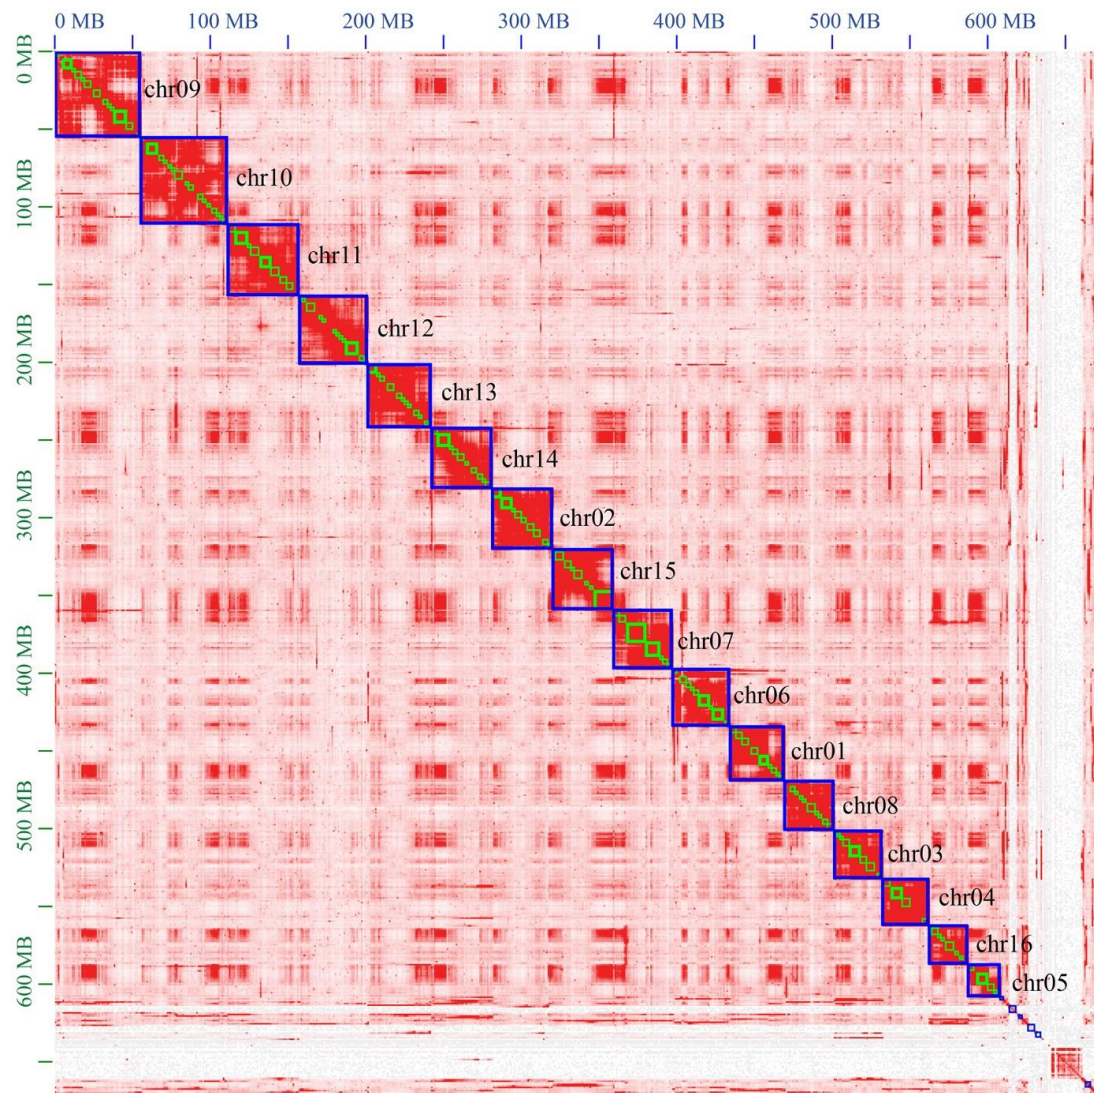

36

37 Figure S4. The distribution of GC content.

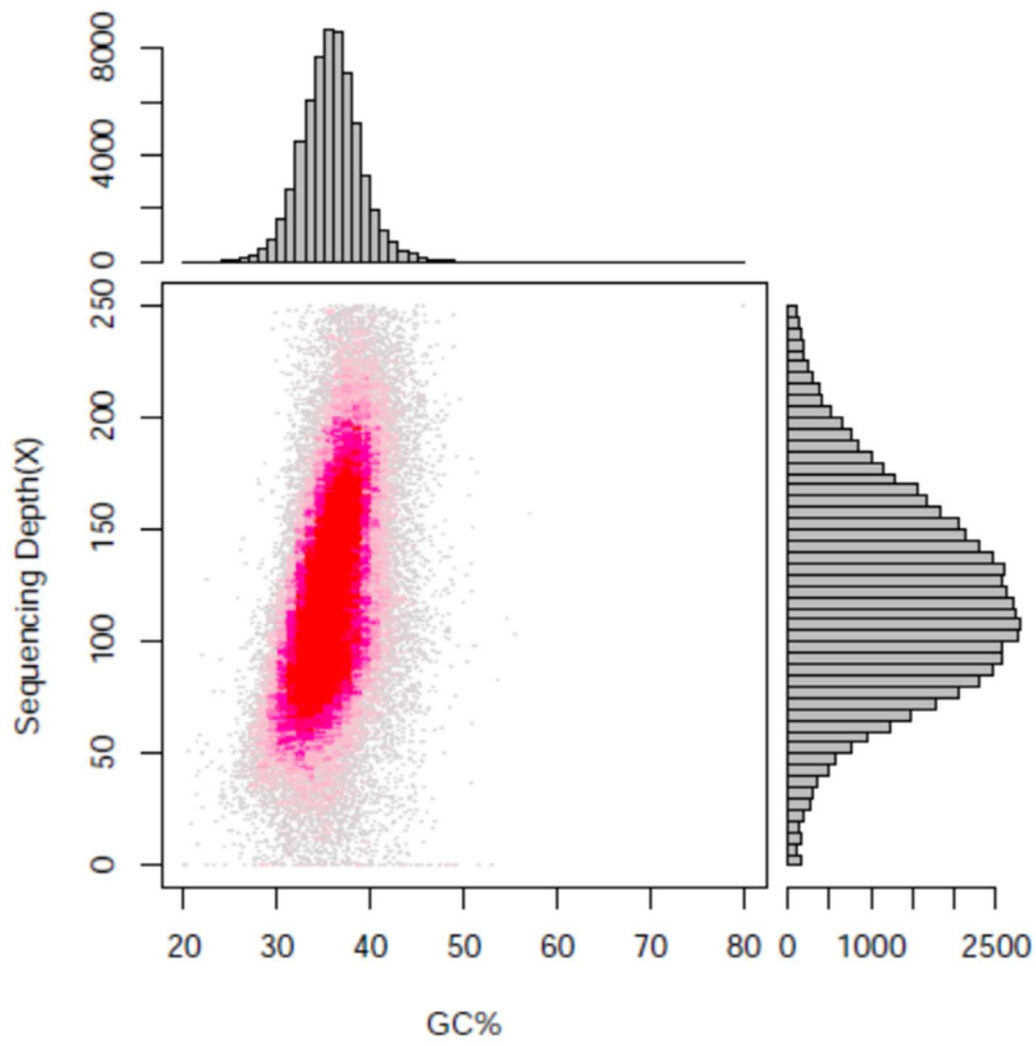

38

39 Figure S5. The contigs distribution of version 1.0 assembly on the chromosomes of version  
40 2.0 assembly.

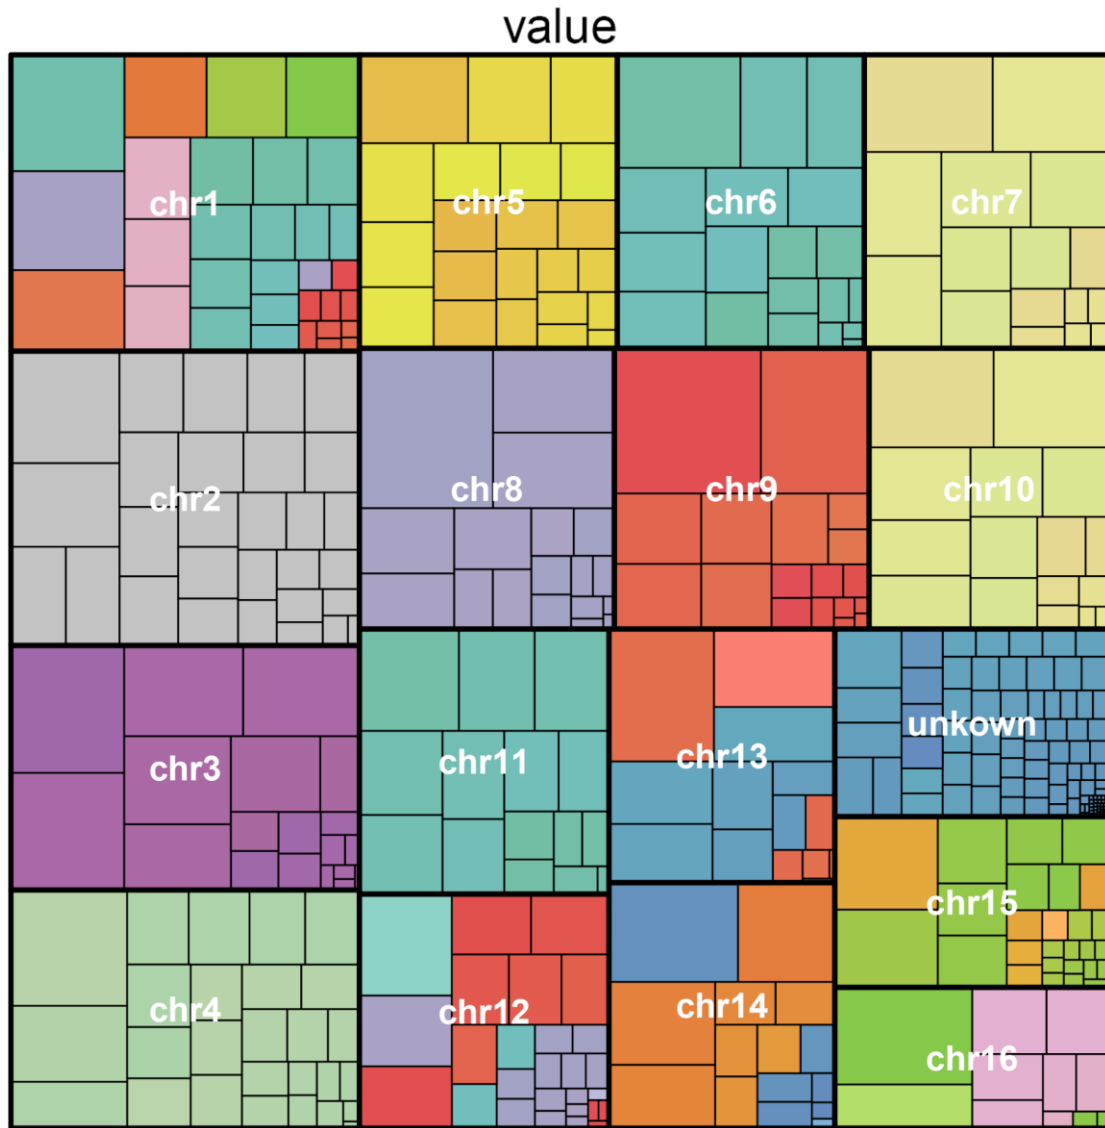



42 Figure S6. Global synteny between the gap-free ‘Pawnee’ assembly by Lovell et al. (2021)  
43 (chr1 – chr16) and Cil\_V. 2.0 (CHR01 – CHR16).

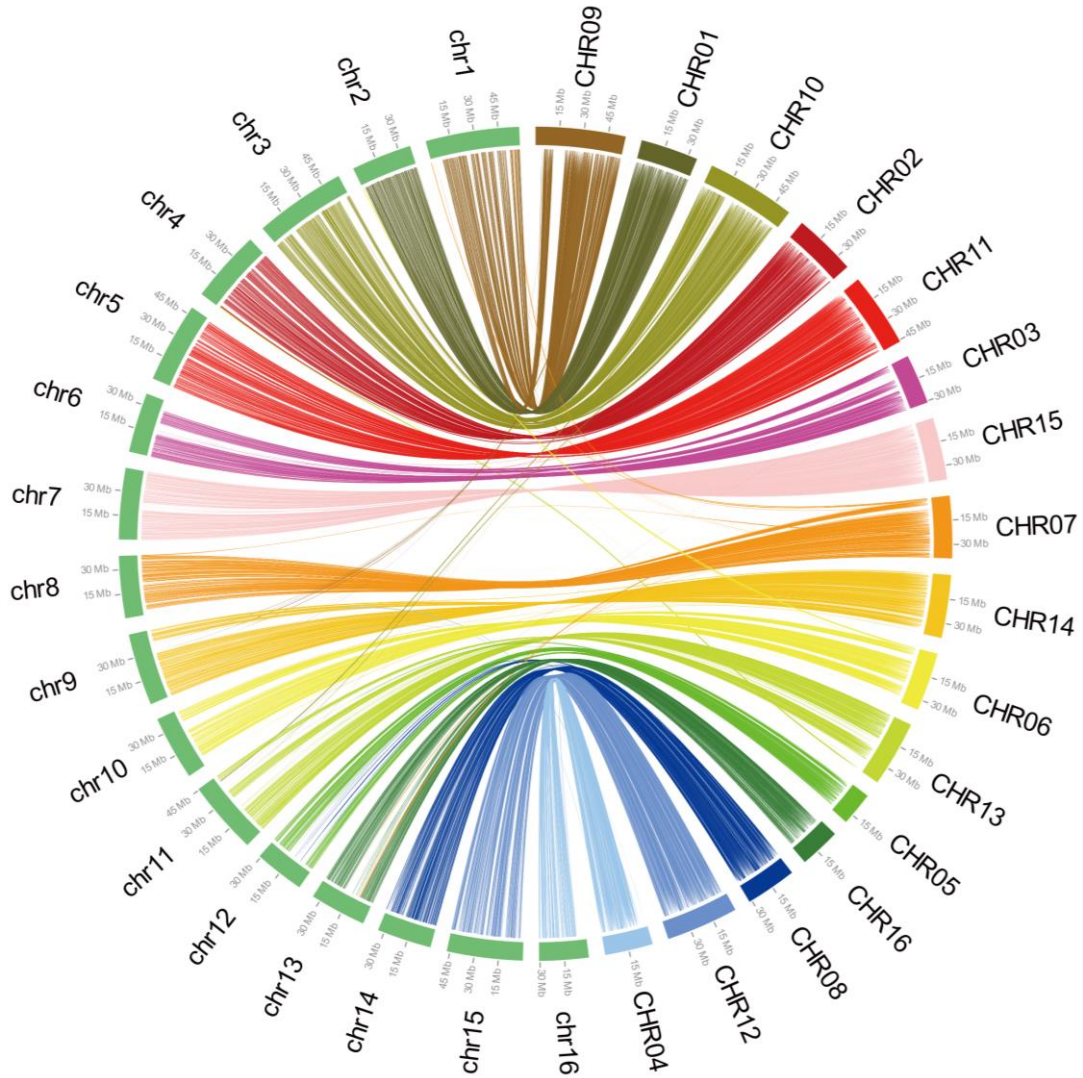

44

45 Figure S7. The details of syntenic relationship between the gap-free 'Pawnee' assembly by  
46 Lovell et al. (2021) (chr1 – chr16) and Cil\_V. 2.0 (CHR01 – CHR16).

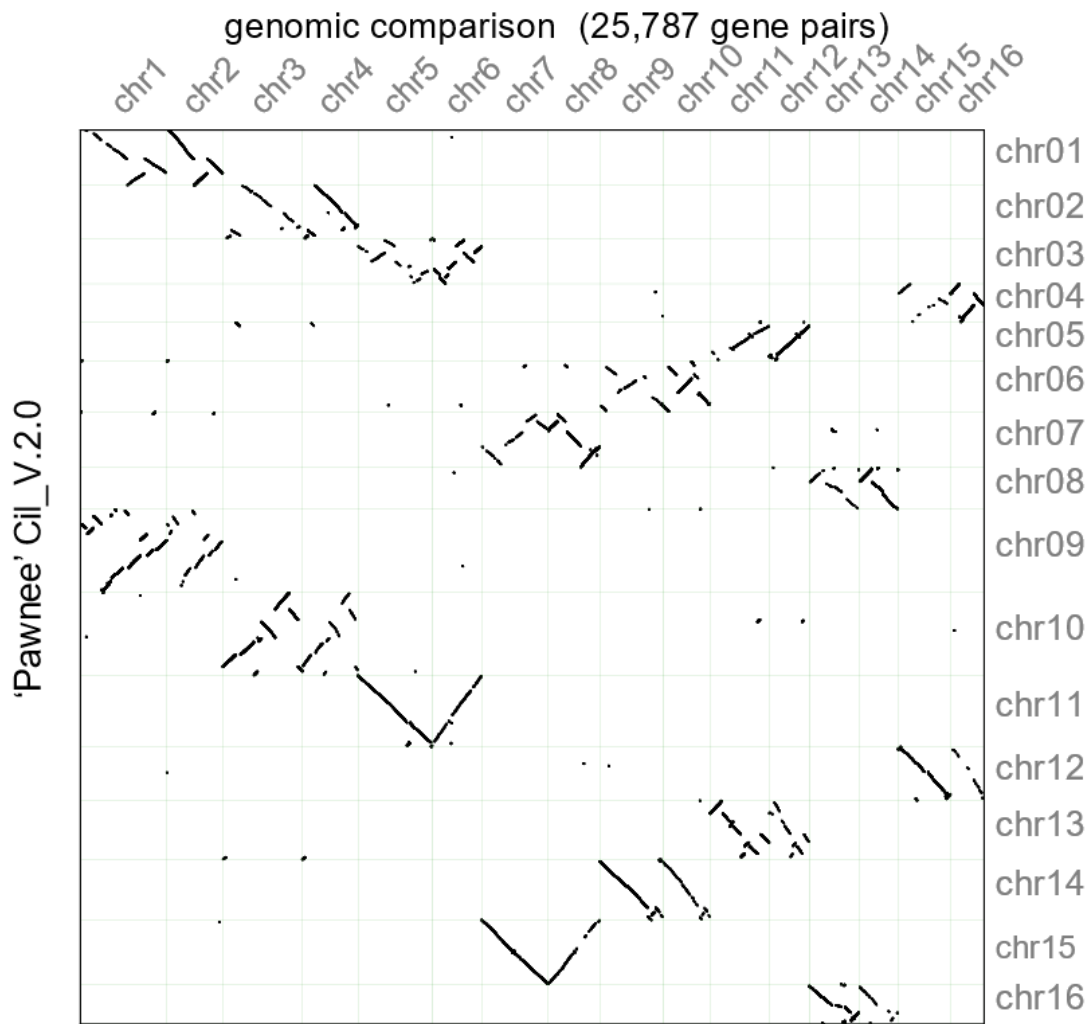

47 'Pawnee' Lovell et al. 2021, Nature Communications

48 Figure S8. Evolutionary relationships of chromosomes among pecan, walnut and bayberry.

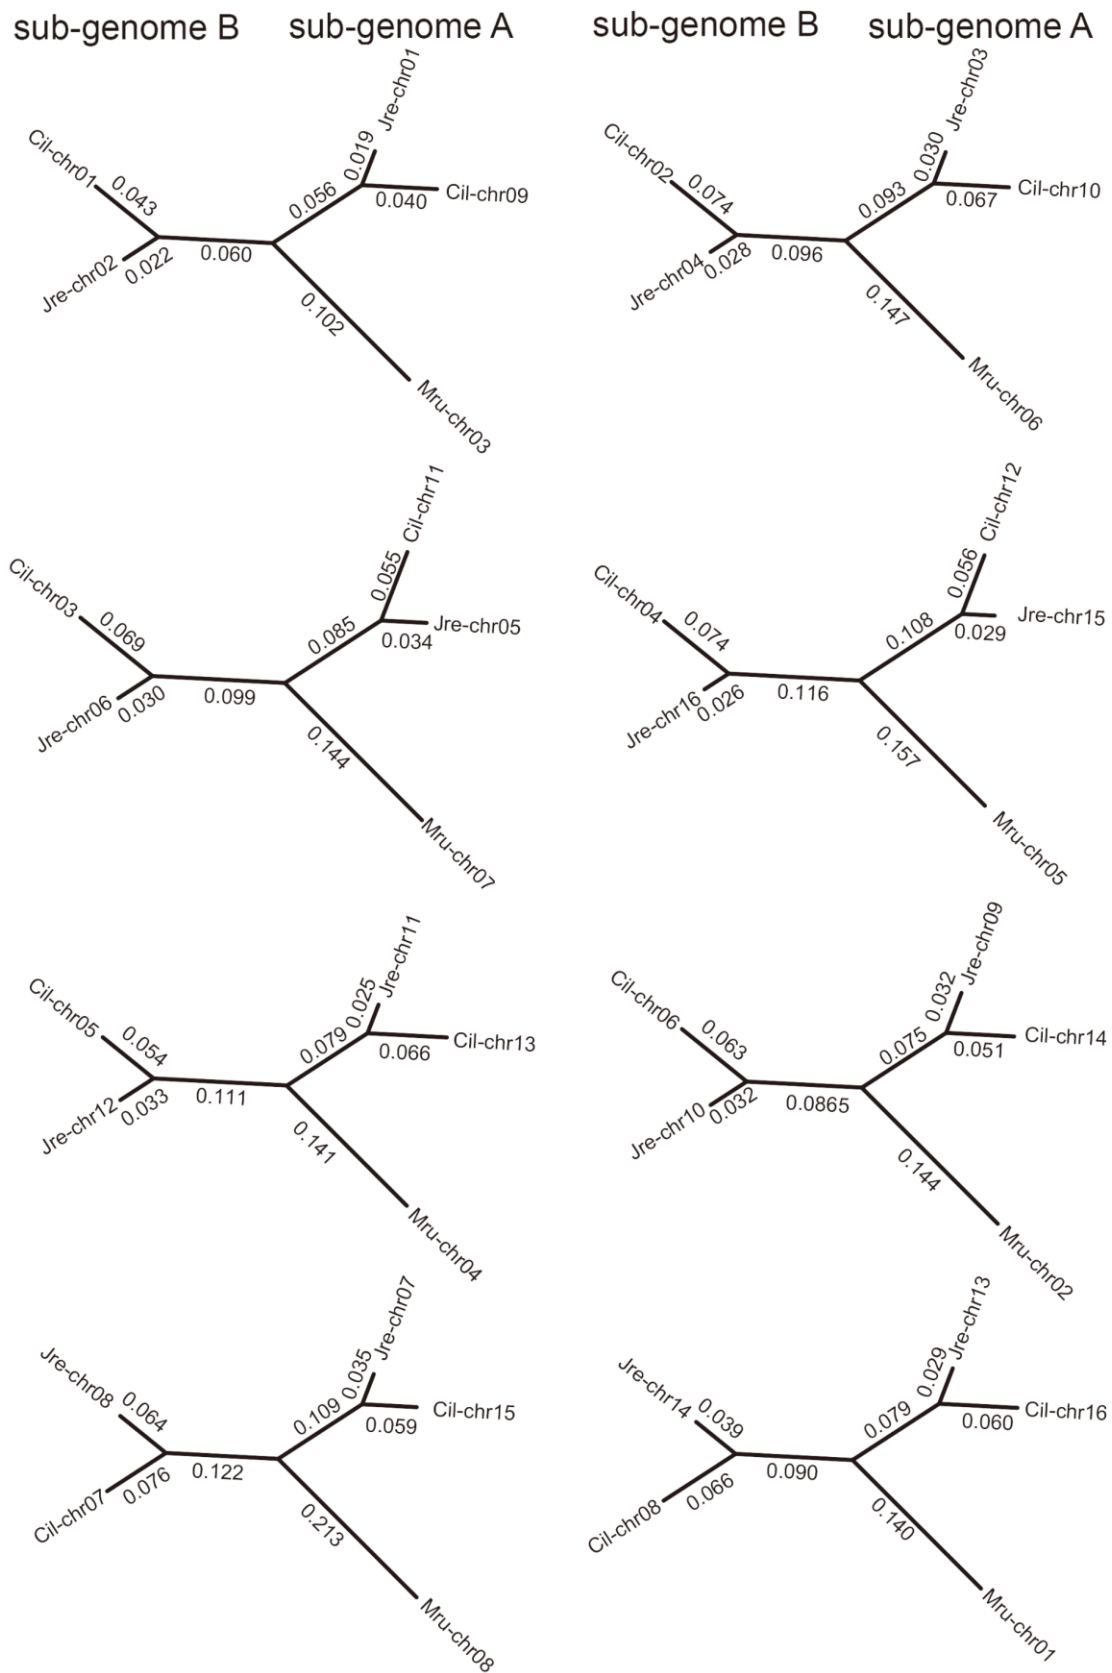

50 Figure S9. Identity analysis between subgenomes in pecan.

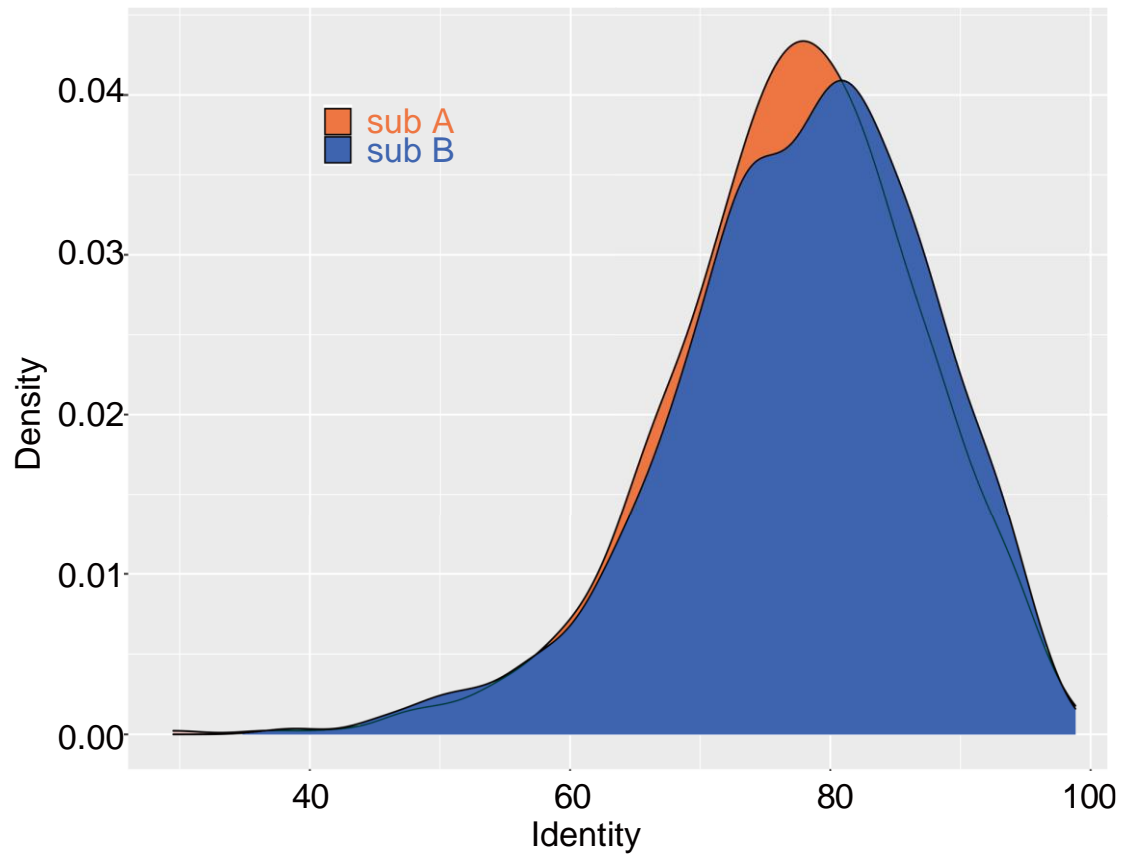

51

52 Figure S10. *Ka/Ks* analysis between subgenomes in pecan.

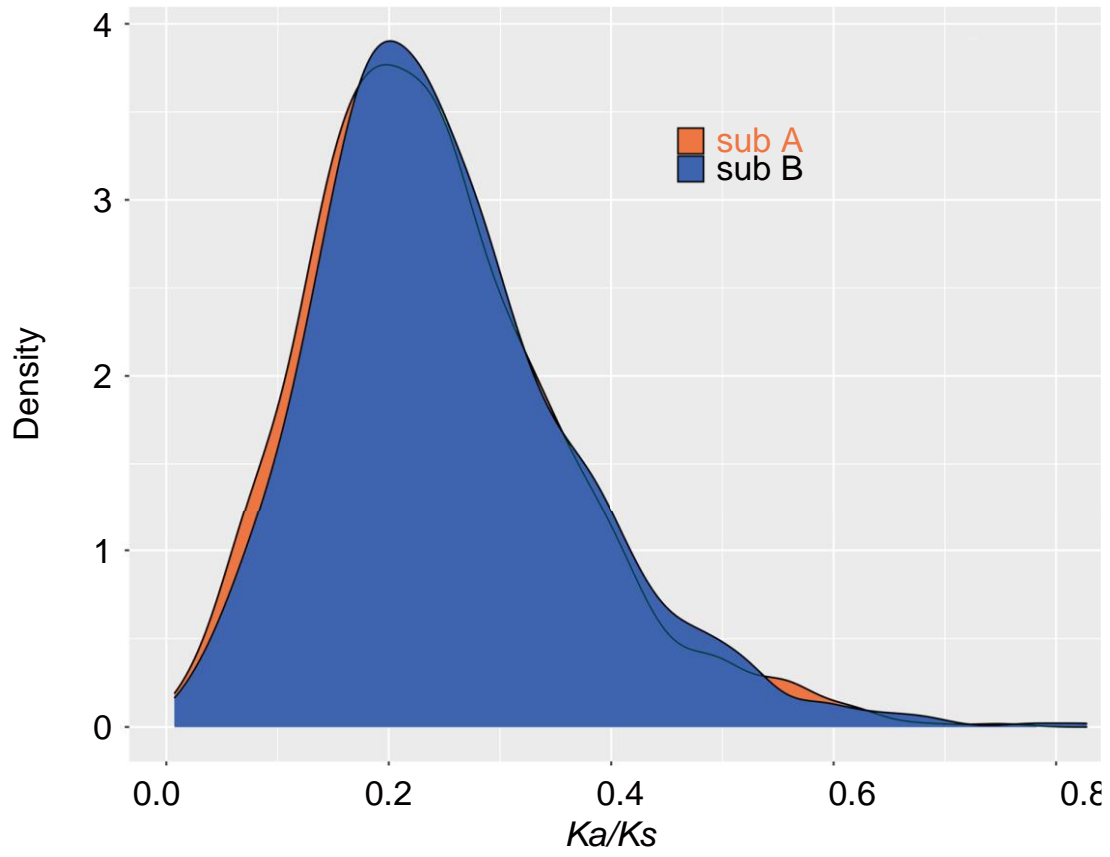

53

54 Figure S11. The frequency distributions (upper) and correlation analyses (lower) of  $Ka$ ,  $Ks$ ,  
55 and  $Ka/Ks$ . blue line represented the fitted curve, and the shaded part represented the  
56 confidence interval.

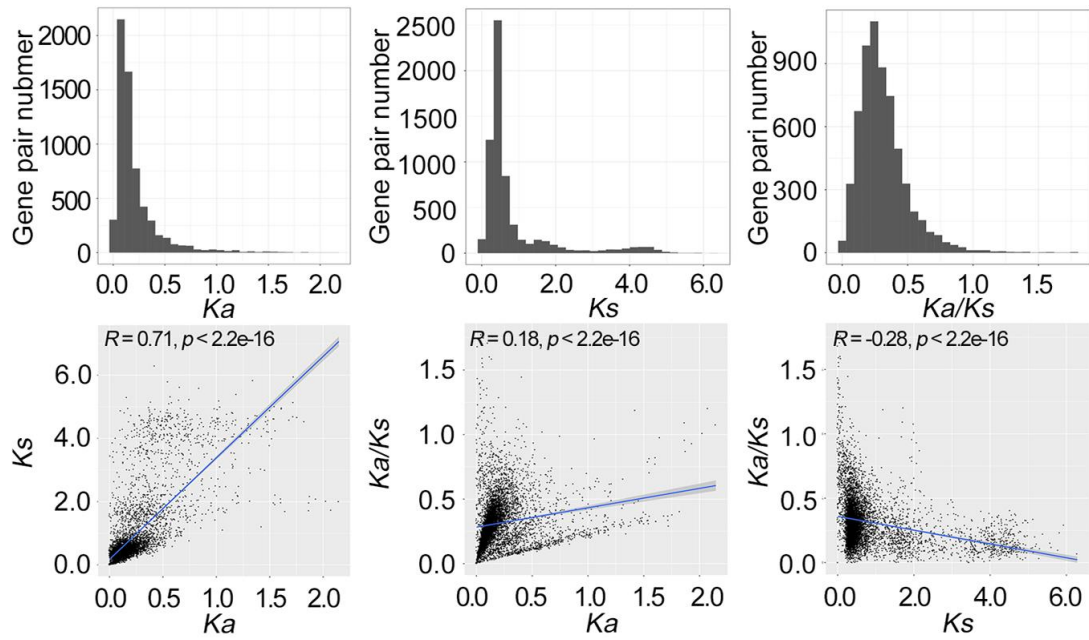

57

58 Figure S12. Distribution of *FAR1* transcription factor family members on chromosomes.

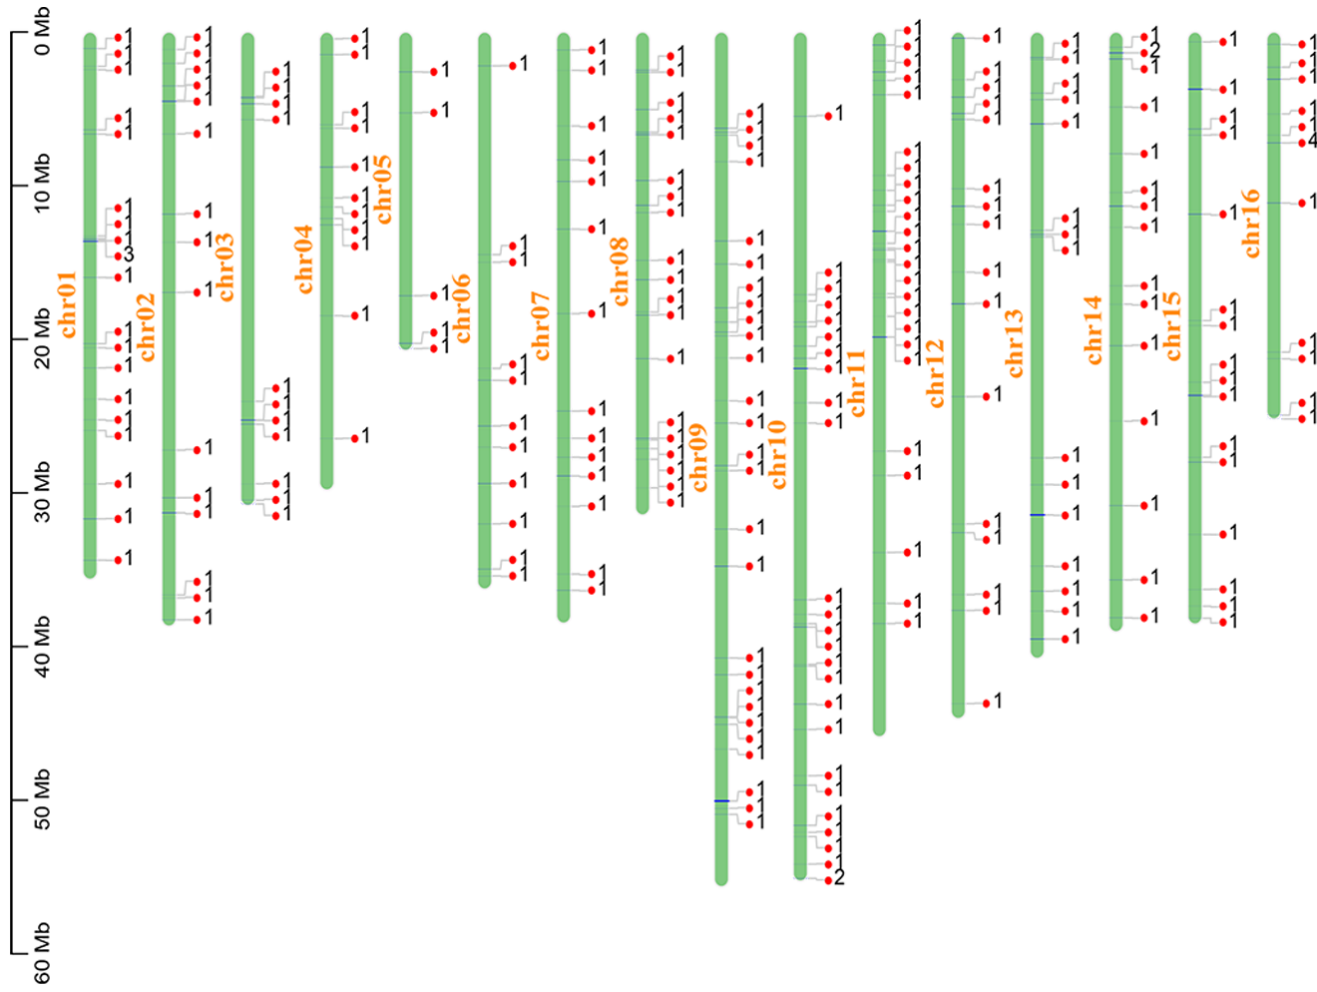

59

## Supplemental Tables

Table S1. Data statistics for pecan genome survey and assembly.

| <b>Platform</b>      | <b>Data type</b> | <b>Number of Reads</b> | <b>Total length (bp)</b> | <b>N50 Length of Reads</b> | <b>N90 Length of Reads</b> | <b>Average Read Length (bp)</b> | <b>Maximum Read Length (bp)</b> | <b>Mean Quality</b> |             |
|----------------------|------------------|------------------------|--------------------------|----------------------------|----------------------------|---------------------------------|---------------------------------|---------------------|-------------|
| Nanopore             | Raw Data         | 5,925,714              | 76,162,104,265           | 43,224                     | 18,376                     | 12,852                          | 663,065                         |                     |             |
|                      | Clean Data       | 2,184,040              | 71,697,987,348           | 44,087                     | 20,238                     | 32,828                          | 663,065                         |                     |             |
| HiSeq X-Ten (PE150)* | Raw Data         | 1,122,405,046          | 168,360,756,900          | -                          | -                          | -                               | -                               | 94.17% (Q20)        | 88.6% (Q30) |
|                      | Clean Data       | 1,121,333,120          | 168,199,968,000          | -                          | -                          | -                               | -                               |                     |             |
|                      |                  | <b>Number of Reads</b> | <b>Total length (bp)</b> | <b>Mapped</b>              | <b>Mapping Ratio</b>       | <b>Valid Pairs</b>              | <b>Percentage</b>               |                     |             |
| Hi-C (PE100)         |                  | 1,518,592,046          | 151,859,204,600          | 1,139,158,524              | 75.01%                     | 196,757,892                     | 25.91%                          |                     |             |

\* Our previously published data (Huang et al., 2019).



Table S2. Nanopore clean data length distribution.

| <b>Length</b> | <b>Reads<br/>Number</b> | <b>Total Length<br/>(bp)</b> | <b>Percentage<br/>(%)</b> | <b>Average<br/>Length (bp)</b> |
|---------------|-------------------------|------------------------------|---------------------------|--------------------------------|
| 2,000~5,000   | 166,917                 | 572,320,083                  | 0.79                      | 3,428.77                       |
| 5,000~10,000  | 232,711                 | 1,728,955,943                | 2.41                      | 7,429.62                       |
| 10,000~20,000 | 321,955                 | 4,719,951,481                | 6.58                      | 14,660.28                      |
| 20,000~30,000 | 327,150                 | 8,230,356,547                | 11.47                     | 25,157.74                      |
| 30,000~40,000 | 438,229                 | 15,243,432,557               | 21.26                     | 34,784.17                      |
| 40,000~50,000 | 272,129                 | 12,137,281,885               | 16.92                     | 44,601.20                      |
| 50,000~60,000 | 173,608                 | 9,481,705,172                | 13.22                     | 54,615.60                      |
| 60,000~70,000 | 106,138                 | 6,851,483,605                | 9.55                      | 64,552.59                      |
| 70,000~80,000 | 62,318                  | 4,644,803,948                | 6.47                      | 74,533.90                      |
| >=80,000      | 82,885                  | 8,087,696,127                | 11.28                     | 97,577.31                      |

Table S3. Summary of the pecan genome assembly.

|          | <b>Sequence Type</b> | <b>Total Number</b> | <b>Total Length (bp)</b> | <b>N50 (bp)</b> | <b>N90 (bp)</b> | <b>Longest Read (bp)</b> | <b>Shortest Read (bp)</b> | <b>Gap Length (bp)</b> | <b>GC Content (%)</b> |
|----------|----------------------|---------------------|--------------------------|-----------------|-----------------|--------------------------|---------------------------|------------------------|-----------------------|
| Nanopore | contig               | 341                 | 636,255,455              | 4,195,733       | 1,070,318       | 23,879,822               | 1,663                     | 0                      | 35.89                 |
|          | scaffold             | 124                 | 636,406,555              | 38,784,058      | 25,295,717      | 55,745,374               | 1,663                     | 263,863                | 35.89                 |
| Hi-C     | contig               | 564                 | 636,142,692              | 2,893,887       | 789,098         | 11,551,424               | 112                       | -                      | 35.89                 |

Table S4. The statistics of pecan chromosome length.

| <b>Chromosome ID</b> | <b>Length (bp)</b> | <b>Percentage of assembly (%)</b> |
|----------------------|--------------------|-----------------------------------|
| chr01                | 35,734,486         | 5.62                              |
| chr02                | 38,784,058         | 6.09                              |
| chr03                | 30,933,461         | 4.86                              |
| chr04                | 29,925,508         | 4.70                              |
| chr05                | 20,838,255         | 3.27                              |
| chr06                | 36,373,273         | 5.72                              |
| chr07                | 38,592,383         | 6.06                              |
| chr08                | 31,550,154         | 4.96                              |
| chr09                | 55,745,374         | 8.76                              |
| chr10                | 55,374,445         | 8.70                              |
| chr11                | 45,985,284         | 7.23                              |
| chr12                | 44,801,196         | 7.04                              |
| chr13                | 40,882,215         | 6.42                              |
| chr14                | 39,152,115         | 6.15                              |
| chr15                | 38,648,230         | 6.07                              |
| chr16                | 25,295,717         | 3.97                              |
| Total                | 608,616,154        | 95.63                             |
| un-anchored          | 63,793,453         | 4.37                              |

Table S5. Assessment of the gene coverage rate for pecan assembly and predicted protein-coding genes by BUSCO.

|                             | Percentage (%)   |                      |
|-----------------------------|------------------|----------------------|
|                             | Assembly         | Protein-coding genes |
| Complete BUSCOs             | 95.1 (409 genes) | 93.7 (403 genes)     |
| Complete Single-Copy BUSCOs | 85.3 (367 genes) | 85.6 (368 genes)     |
| Complete Duplicated BUSCOs  | 9.8 (42 genes)   | 8.1 (35 genes)       |
| Fragmented BUSCOs           | 1.2 (5genes)     | 4.2 (18 genes)       |
| Missing BUSCOs              | 3.7 (16 genes)   | 2.1 (9 genes)        |

Table S6. Reads coverage statistics of pecan genome assembly.

|                                     |        |
|-------------------------------------|--------|
| Reads mapping rate (%)              | 95.95  |
| Coverage of genome (%)              | 96.38  |
| Coverage of genome > 4× (%)         | 95.25  |
| Coverage of genome > 10× (%)        | 94.45  |
| Coverage of genome > 20× (%)        | 93.72  |
| Genome average sequencing depth (×) | 215.49 |

Table S7. Repeat sequence prediction.

| <b>Type</b>       | <b>Repeat<br/>Size(bp)</b> | <b>% of<br/>genome</b> |
|-------------------|----------------------------|------------------------|
| TRF               | 23,381,072                 | 3.67                   |
| RepeatMasker      | 87,654,647                 | 13.77                  |
| RepeatProteinMask | 76,449,465                 | 12.01                  |
| <i>De novo</i>    | 279,886,295                | 43.98                  |
| Total             | 304,405,087                | 47.83                  |

Table S8. Repeat category statistics.

|         | Rebase TEs  |             | De novo     |             | TE Proteins |             | Combined TEs |             |
|---------|-------------|-------------|-------------|-------------|-------------|-------------|--------------|-------------|
|         | Length (bp) | % in Genome | Length (bp) | % in Genome | Length (bp) | % in Genome | Length (bp)  | % in Genome |
| DNA     | 11,627,231  | 1.83        | 543,601     | 0.09        | 30,704,387  | 4.82        | 37,638,398   | 5.91        |
| LINE    | 11,392,813  | 1.79        | 7,268,375   | 1.14        | 29,105,229  | 4.57        | 37,741,823   | 5.93        |
| SINE    | 15,026      | 0           | 0           | 0           | 169,332     | 0.03        | 184,288      | 0.03        |
| LTR     | 65,295,660  | 10.26       | 69,106,873  | 10.86       | 213,465,587 | 33.54       | 223,597,995  | 35.13       |
| Other   | 1,510       | 0           | 0           | 0           | 0           | 0           | 1,510        | 0           |
| Unknown | 0           | 0           | 0           | 0           | 7,712,931   | 1.21        | 7,712,931    | 1.21        |
| Total   | 87,654,647  | 13.77       | 76,449,465  | 12.01       | 272,008,903 | 42.74       | 288,757,673  | 45.37       |

Table S9. Statistics of repeat sequences and subfamilies of transposable elements (TEs).

| <b>Repeat category</b> | <b>subfamily</b>  | <b>Size (bp)</b> | <b>% of repeat</b> | <b>Size in sub A (bp)</b> | <b>Size in sub B (bp)</b> |
|------------------------|-------------------|------------------|--------------------|---------------------------|---------------------------|
| <b>TEs</b>             | DNA/Academ        | 5,469            | 0.0018             | 9,341                     | 2,354                     |
|                        | DNA/CMC-Chapaev   | 62,165           | 0.0204             | 32,422                    | 60,462                    |
|                        | DNA/CMC-Chapaev-3 | 4,573            | 0.0015             | 16,279                    | 1,779                     |
|                        | DNA/CMC-EnSpm     | 13,705,125       | 4.5023             | 7,187,368                 | 5,294,574                 |
|                        | DNA/CMC-Transib   | 37,776           | 0.0124             | 25,999                    | 37,221                    |
|                        | DNA/Crypton       | 11,841           | 0.0039             | 8,124                     | 4,542                     |
|                        | DNA/Crypton-H     | 30               | 0.0000             | 30                        | 0                         |
|                        | DNA/Crypton-V     | 32,639           | 0.0107             | 20,358                    | 14,472                    |
|                        | DNA/Dada          | 27,039           | 0.0089             | 16,247                    | 11,406                    |
|                        | DNA/DNA           | 4,349,717        | 1.4289             | 1,878,329                 | 1,913,326                 |
|                        | DNA/Ginger        | 224,921          | 0.0739             | 56,442                    | 39,807                    |
|                        | DNA/Harbinger     | 157              | 0.0001             | 0                         | 42,725                    |
|                        | DNA/hAT           | 257,672          | 0.0846             | 76,133                    | 113,094                   |
|                        | DNA/hAT-Ac        | 6,752,533        | 2.2183             | 3,657,022                 | 2,122,439                 |
|                        | DNA/hAT-Blackjack | 5,768            | 0.0019             | 3,612                     | 2,440                     |
|                        | DNA/hAT-Charlie   | 89,895           | 0.0295             | 31,249                    | 34,502                    |
|                        | DNA/hAT-hAT5      | 932              | 0.0003             | 516                       | 34                        |
|                        | DNA/hAT-hATm      | 23,540           | 0.0077             | 24,983                    | 568                       |
|                        | DNA/hAT-hATw      | 44,907           | 0.0148             | 1,806                     | 10,499                    |
|                        | DNA/hAT-hobo      | 1,073            | 0.0000             | 131                       | 942                       |
|                        | DNA/hAT-Pegasus   | 6,548            | 0.0022             | 5,483                     | 357                       |
|                        | DNA/hAT-Tag1      | 212,854          | 0.0699             | 103,730                   | 139,728                   |
|                        | DNA/hAT-Tip100    | 890,171          | 0.2924             | 419,440                   | 486,037                   |
|                        | DNA/hAT-Tol2      | 1,571            | 0.0005             | 581                       | 1,268                     |
|                        | DNA/Helitron      | 3,984,983        | 1.3091             | 2,733,752                 | 1,235,857                 |
|                        | DNA/IS3EU         | 40,653           | 0.0134             | 31,592                    | 20,232                    |
|                        | DNA/Kolobok       | 4,864            | 0.0016             | 3,152                     | 2,163                     |
|                        | DNA/Kolobok-Hydra | 46,173           | 0.0152             | 30,274                    | 18,947                    |
|                        | DNA/Kolobok-T2    | 21,446           | 0.0070             | 14,732                    | 9,034                     |
|                        | DNA/Maverick      | 208,700          | 0.0686             | 149,653                   | 43,345                    |
|                        | DNA/Merlin        | 24,885           | 0.0082             | 14,570                    | 12,415                    |
|                        | DNA/MuLE-MuDR     | 2,461,172        | 0.8085             | 1,003,829                 | 243,805                   |
|                        | DNA/MULE-MuDR     | 1,555,016        | 0.5108             | 776,984                   | 806,123                   |
|                        | DNA/MULE-NOF      | 586              | 0.0002             | 605                       | 180                       |
|                        | DNA/Novosib       | 406,496          | 0.1335             | 39,528                    | 24,091                    |
|                        | DNA/P             | 60,621           | 0.0199             | 81,580                    | 27,582                    |
|                        | DNA/PIF-Harbinger | 1,371,592        | 0.4506             | 654,087                   | 846,539                   |
|                        | DNA/PIF-HarbS     | 77               | 0.0000             | 77                        | 0                         |
|                        | DNA/PIF-ISL2EU    | 75,979           | 0.0250             | 27,052                    | 47,067                    |
|                        | DNA/PiggyBac      | 7,110            | 0.0023             | 2,477                     | 3,840                     |



|                    |                    |                |                   |                   |
|--------------------|--------------------|----------------|-------------------|-------------------|
| DNA/Sola           | 176,894            | 0.0581         | 37,257            | 33,279            |
| DNA/TcMar          | 25,474             | 0.0084         | 85,690            | 11,261            |
| DNA/TcMar-Fot1     | 70,520             | 0.0232         | 33,800            | 54,152            |
| DNA/TcMar-ISRm11   | 82,655             | 0.0272         | 4,336             | 2,761             |
| DNA/TcMar-Pogo     | 56                 | 0.0000         | 72                | 0                 |
| DNA/TcMar-Stowaway | 11,676             | 0.0038         | 6,794             | 4,918             |
| DNA/TcMar-Tc1      | 22,562             | 0.0074         | 2,531             | 25,253            |
| DNA/TcMar-Tc4      | 42                 | 0.0000         | 111               | 62                |
| DNA/TcMar-Tigger   | 2,420,774          | 0.7953         | 1,099,620         | 442,736           |
| DNA/Zator          | 42                 | 0.0000         | 42                | 0                 |
| DNA/Zisupton       | 33,249             | 0.0109         | 3,637             | 2,548             |
| LINE/Ambal         | 204                | 0.0001         | 61                | 131               |
| LINE/CR1           | 1,591              | 0.0005         | 252,970           | 220               |
| LINE/CRE           | 145                | 0.0000         | 10,563            | 924               |
| LINE/Dong-R4       | 1,633              | 0.0005         | 306               | 521               |
| LINE/DRE           | 3,854              | 0.0013         | 1,432             | 11,786            |
| LINE/I             | 1,253              | 0.0004         | 415               | 784               |
| LINE/Jockey        | 7,477              | 0.0025         | 4,970             | 3,341             |
| LINE/L1            | 36,940,270         | 12.1354        | 17,420,214        | 13,392,696        |
| LINE/L1-Tx1        | 87,445             | 0.0287         | 71,425            | 47,860            |
| LINE/L2            | 608,135            | 0.1998         | 205,047           | 235,900           |
| LINE/LINE          | 11,721             | 0.0039         | 5,016             | 5,624             |
| LINE/Penelope      | 64,425             | 0.0212         | 84,909            | 23,469            |
| LINE/Proto1        | 1,633              | 0.0005         | 726               | 301               |
| LINE/R1            | 6,649              | 0.0022         | 50,145            | 1,863             |
| LINE/R2            | 60,729             | 0.0200         | 31,170            | 27,900            |
| LINE/Rex-Babar     | 1,415              | 0.0005         | 718               | 625               |
| LINE/RTE-BovB      | 11,161             | 0.0037         | 6,676             | 2,657             |
| LINE/RTE-RTE       | 59                 | 0.0000         |                   | 59                |
| LINE/RTE-X         | 5,055              | 0.0017         | 1,824             | 1,598             |
| LINE/Tad1          | 268                | 0.0001         | 3,059             | 35,899            |
| LTR/Cassandra      | 24,252             | 0.0080         | 5425              | 704               |
| LTR/Caulimoviru    | 1,189,232          | 0.3907         | 661,600           | 429,225           |
| LTR/Caulimovirus   | 2,309,802          | 0.7588         | 1,308,128         | 1,095,708         |
| <b>LTR/Copia</b>   | <b>104,193,921</b> | <b>34.2293</b> | <b>51,853,612</b> | <b>35,515,454</b> |
| LTR/DIRS           | 78,269             | 0.0257         | 38,803            | 7,854             |
| LTR/ERV            | 20,131             | 0.0066         | 858               | 281               |
| LTR/ERV1           | 221,271            | 0.0727         | 89,544            | 59,614            |
| LTR/ERV4           | 670                | 0.0002         | 381               | 7554              |
| LTR/ERV-Foamy      | 61                 | 0.0000         | 61                | 0                 |
| LTR/ERVK           | 118,769            | 0.0390         | 161,658           | 130,585           |
| LTR/ERVL           | 3,191              | 0.0010         | 1,618             | 1,506             |
| LTR/ERVL-MaLR      | 46                 | 0.0000         | 46                | 0                 |
| <b>LTR/Gypsy</b>   | <b>105,595,920</b> | <b>34.6899</b> | <b>46,854,456</b> | <b>44,036,255</b> |

|                  |                  |            |        |           |           |
|------------------|------------------|------------|--------|-----------|-----------|
|                  | LTR/LTR          | 23,178,086 | 7.6144 | 9,812,895 | 6,951,532 |
|                  | LTR/Ngaro        | 7,059      | 0.0023 | 5,619     | 2,028     |
|                  | LTR/Pao          | 166,864    | 0.0548 | 25,964    | 54,808    |
|                  | SINE/Alu         | 72         | 0.0000 | 3,380     | 0         |
|                  | SINE/B2          | 54         | 0.0000 | 54        | 0         |
|                  | SINE/B4          | 4,668      | 0.0015 | 3,080     | 2,061     |
|                  | SINE/ID          | 2,600      | 0.0009 | 1,719     | 1,303     |
|                  | SINE/SINE        | 169,564    | 0.0557 | 16,485    | 88,089    |
|                  | SINE/tRNA-7SL    | 577        | 0.0002 | 503       | 214       |
|                  | SINE/tRNA-C      | 4,672      | 0.0015 | 2,839     | 2,508     |
|                  | SINE/tRNA-Core   | 655        | 0.0002 | 450       | 0         |
|                  | SINE/tRNA-Deu-L2 | 275        | 0.0001 | 263       | 57        |
|                  | SINE/tRNA-L2     | 132        | 0.0000 | 132       | 0         |
|                  | SINE/tRNA-RTE    | 1,135      | 0.0004 | 607       | 280       |
|                  | SINE/U           | 136        | 0.0000 | 132       | 68        |
| <b>Satellite</b> | Satellite        | 246,671    | 0.0810 | 287,088   | 139,547   |
| <b>Other</b>     | Composite        | 252        | 0.0001 | 126       | 126       |
| <b>Other</b>     | DNA_virus        | 1,258      | 0.0004 | 640       | 637       |
| <b>Simple</b>    | Simple_repeat    | 7,630,721  | 2.5068 | 4,184,870 | 4,107,352 |
| <b>Unknown</b>   | Unknown          | 7,712,931  | 2.5338 | 6,531,303 | 7,424,836 |

---

Table S10. Statistics of gene structure prediction in pecan genome assembly.

| Gene set   |                             | Number of genes | CDS+intron length (bp) | CDS length (bp) | exon length (bp) | intron (bp) | Exons per gene |
|------------|-----------------------------|-----------------|------------------------|-----------------|------------------|-------------|----------------|
|            | <i>Arabidopsis thaliana</i> | 36,944          | 8,410.66               | 1,262.22        | 206.68           | 1,399.73    | 6.11           |
|            | <i>Cucumis sativus</i>      | 22,467          | 6,573.42               | 1,194.11        | 231.52           | 1,293.82    | 5.16           |
|            | <i>Glycine max</i>          | 21,176          | 7,865.64               | 1,300.34        | 226.89           | 1,387.66    | 5.73           |
|            | <i>Prunus persica</i>       | 30,693          | 12,085.40              | 1,220.08        | 240.04           | 2,661.25    | 5.08           |
| Homolog    | <i>Citrullus lanatus</i>    | 41,721          | 9,415.54               | 1,246.60        | 229.94           | 1,847.63    | 5.42           |
|            | <i>Eucalyptus grandis</i>   | 43,556          | 13,258.85              | 1,144.50        | 235.99           | 3,146.84    | 4.85           |
|            | <i>Malus domestica</i>      | 18,803          | 6,188.82               | 1,003.87        | 207.23           | 1,348.76    | 4.84           |
|            | <i>Populus trichocarpa</i>  | 32,661          | 10,064.20              | 1,313.59        | 237.69           | 1,933.22    | 5.53           |
|            | <i>Vitis vinifera</i>       | 24,743          | 13,946.90              | 1,328.17        | 236.56           | 2,734.52    | 5.61           |
| De novo    | Augustus                    | 49,803          | 4333.06                | 1276.33         | 233.22           | 683.43      | 5.47           |
| Transcript | Trinity                     | 154,647         |                        |                 | /                |             |                |
| Total      |                             | 33,472          | 5482.63                | 1460.04         | 220.81           | 716.76      | 6.61           |

Table S11. Comparison of gene structure among the close relatives.

| <b>Species</b>              | <b>Number</b> | <b>Average transcript length (bp)</b> | <b>Average CDS length (bp)</b> | <b>Average intron length (bp)</b> | <b>Average exon length (bp)</b> | <b>Average exons per gene</b> |
|-----------------------------|---------------|---------------------------------------|--------------------------------|-----------------------------------|---------------------------------|-------------------------------|
| <i>Carya illinoensis</i>    | 33,472        | 5,482.63                              | 1460.04                        | 716.76                            | 220.81                          | 6.61                          |
| <i>Arabidopsis thaliana</i> | 27,465        | 1,890.03                              | 1223.07                        | 161.1                             | 237.88                          | 5.14                          |
| <i>Eucalyptus grandis</i>   | 36,625        | 2,568.35                              | 1136.77                        | 409.07                            | 252.64                          | 4.5                           |
| <i>Glycine max</i>          | 46,949        | 3,616.50                              | 1289.18                        | 537.56                            | 241.89                          | 5.33                          |
| <i>Populus trichocarpa</i>  | 31,612        | 3,314.73                              | 1392.68                        | 421.85                            | 250.65                          | 5.56                          |
| <i>Vitis vinifera</i>       | 25,726        | 5,619.01                              | 1348.43                        | 1008.82                           | 257.66                          | 5.23                          |

Table S12. Statistics of function annotation of protein-coding genes in pecan genome assembly (version 2.0).

| <b>Database</b> | <b>Number</b> | <b>Percentage (%)</b> |
|-----------------|---------------|-----------------------|
| Swissprot       | 24,359        | 72.77                 |
| KEGG            | 25,885        | 77.33                 |
| TrEMBL          | 30,885        | 92.27                 |
| Interpro        | 26,047        | 77.82                 |
| GO              | 18,205        | 53.39                 |
| all annotated   | 31,247        | 93.35                 |
| Total           | 33,472        | 100                   |

Table S13. Comparison on genomic features of all assemblies of pecan.

| <b>Genomic features</b>                    | <b>GigaScience<sup>a</sup></b> | <b>Cil_V. 2.0</b> | <b>Nature Communications<sup>b</sup></b> |               |                |               |
|--------------------------------------------|--------------------------------|-------------------|------------------------------------------|---------------|----------------|---------------|
|                                            | <b>Pawnee</b>                  | <b>Pawnee</b>     | <b>Oaxaca</b>                            | <b>Lakota</b> | <b>Elliott</b> | <b>Pawnee</b> |
| Total length of scaffolds (Mb)             | 651.31                         | 636.41            | 649.96                                   | 668.99        | 656.69         | 674.27        |
| Number of scaffolds & contigs              | 3860/17542                     | 125 & 433         | 298 & 552                                | 261 & 499     | 431 & 829      | 16 & 34       |
| Longest scaffold (Mb)                      | 4.92                           | 55.75             | 58.44                                    | 57            | 56.14          | 58.06         |
| N50 of contig length                       | 77.2Kb                         | 3.04Mb            | 4.4Mb                                    | 3.7Mb         | 4.4Mb          | 26.5Mb        |
| Number of predicted protein-coding genes   | 31,075                         | 33,472            | 31,911                                   | 33,280        | 31,042         | 32,267        |
| Pseudochromosomes                          | /                              | 16                | 16                                       | 16            | 16             | 16            |
| Anchored sequence to pseudochromosome (Mb) | /                              | 608.6             | 637.0                                    | 642.9         | 627.1          | 674.3         |
| Genome in chromosomes (%)                  | /                              | 96%               | 98%                                      | 96.10%        | 95.50%         | 100%          |
| Average number of exons per gene           | 5.0                            | 6.6               | 5.4                                      | 5.5           | 5.5            | 5.5           |
| Percentage of repeat sequences (%)         | 50.43                          | 47.83             | 46.5                                     | 33.8          | 32.3           | 49.7          |

Note: a, Huang et al., 2019. b, Lovell et al, 2021.

Table S14. Statistics of key genes related to non-structural polyphenol metabolism and oil accumulation in pecan genome versions 2.0 and 1.0.

|                              | Cil_V. 2.0                    |           |           |          | Verion     |            |
|------------------------------|-------------------------------|-----------|-----------|----------|------------|------------|
|                              | subA                          | subB      | scaffold  | Total    | 1.0        |            |
| <b>Polyphenol metabolism</b> | <b>4CL</b>                    | 16        | 12        | 1        | <b>29</b>  | <b>34</b>  |
|                              | <b>C4H</b>                    | 2         | 1         | 0        | <b>3</b>   | <b>6</b>   |
|                              | <b>LAC15</b>                  | 30        | 11        | 1        | <b>42</b>  | <b>49</b>  |
|                              | <b>MAY123</b>                 | 8         | 7         | 0        | <b>15</b>  | <b>14</b>  |
|                              | <b>PAL</b>                    | 1         | 2         | 0        | <b>3</b>   | <b>8</b>   |
|                              | <b>WDR</b>                    | 0         | 1         | 0        | <b>1</b>   | <b>2</b>   |
|                              | <b>CHS</b>                    | 2         | 1         | 0        | <b>3</b>   | <b>4</b>   |
|                              | <b>CHI</b>                    | 1         | 1         | 0        | <b>2</b>   | <b>2</b>   |
|                              | <b>F3H</b>                    | 1         | 0         | 0        | <b>1</b>   | <b>1</b>   |
|                              | <b>F3'H</b>                   | 4         | 1         | 0        | <b>5</b>   | <b>5</b>   |
|                              | <b>DFR</b>                    | 3         | 0         | 0        | <b>3</b>   | <b>3</b>   |
|                              | <b>LDOX</b>                   | 1         | 0         | 0        | <b>1</b>   | <b>1</b>   |
|                              | <b>ANR</b>                    | 1         | 1         | 0        | <b>2</b>   | <b>3</b>   |
|                              | <b>GSTF</b>                   | 0         | 1         | 0        | <b>1</b>   | <b>1</b>   |
|                              | <b>MATE</b>                   | 2         | 0         | 0        | <b>2</b>   | <b>2</b>   |
|                              | <b>HATPase</b>                | 0         | 1         | 0        | <b>1</b>   | <b>2</b>   |
|                              | <b>Sum</b>                    | <b>72</b> | <b>40</b> | <b>2</b> | <b>114</b> | <b>137</b> |
| <b>Oil accumulation</b>      | <b>ABCAT</b>                  | 1         | 1         | 0        | <b>2</b>   | <b>2</b>   |
|                              | <b>ABI3</b>                   | 1         | 0         | 0        | <b>1</b>   | <b>1</b>   |
|                              | <b>ABI4</b>                   | 1         | 0         | 0        | <b>1</b>   | <b>1</b>   |
|                              | <b>ACP4</b>                   | 1         | 1         | 0        | <b>2</b>   | <b>2</b>   |
|                              | <b>alpha-CT</b>               | 1         | 2         | 0        | <b>3</b>   | <b>3</b>   |
|                              | <b>alpha-PDH</b>              | 1         | 1         | 0        | <b>2</b>   | <b>1</b>   |
|                              | <b>BC</b>                     | 1         | 0         | 0        | <b>1</b>   | <b>1</b>   |
|                              | <b>BCCP1</b>                  | 1         | 1         | 0        | <b>2</b>   | <b>4</b>   |
|                              | <b>beta-CT</b>                | 0         | 0         | 0        | <b>0</b>   | <b>1</b>   |
|                              | <b>beta-PDH</b>               | 1         | 0         | 0        | <b>1</b>   | <b>2</b>   |
|                              | <b>DHLAT/EMB300<br/>3(E2)</b> | 0         | 1         | 0        | <b>1</b>   | <b>1</b>   |
|                              | <b>DHLAT/LTA2(E<br/>2)</b>    | 1         | 1         | 0        | <b>2</b>   | <b>2</b>   |
|                              | <b>ER/ENR1(MOD1<br/>)</b>     | 0         | 1         | 0        | <b>1</b>   | <b>2</b>   |
|                              | <b>FATA</b>                   | 1         | 0         | 0        | <b>1</b>   | <b>2</b>   |
|                              | <b>FATB</b>                   | 1         | 1         | 0        | <b>2</b>   | <b>2</b>   |
|                              | <b>HACPS</b>                  | 1         | 0         | 0        | <b>1</b>   | <b>1</b>   |
|                              | <b>HAD</b>                    | 1         | 0         | 0        | <b>1</b>   | <b>2</b>   |

|                 |           |           |          |           |           |
|-----------------|-----------|-----------|----------|-----------|-----------|
| <b>KAR</b>      | 1         | 1         | 0        | 2         | 3         |
| <b>KASI</b>     | 1         | 1         | 0        | 2         | 3         |
| <b>KASII</b>    | 1         | 1         | 0        | 2         | 3         |
| <b>KASIII</b>   | 1         | 1         | 0        | 2         | 2         |
| <b>LACS8</b>    | 1         | 0         | 0        | 1         | 1         |
| <b>LACS9</b>    | 1         | 0         | 0        | 1         | 2         |
| <b>LPD2(E3)</b> | 1         | 0         | 0        | 1         | 1         |
| <b>LS</b>       | 1         | 1         | 0        | 2         | 2         |
| <b>LT</b>       | 0         | 1         | 0        | 1         | 1         |
| <b>MCMT</b>     | 1         | 1         | 0        | 2         | 2         |
| <b>PII</b>      | 1         | 0         | 0        | 1         | 2         |
| <b>SAD/DES5</b> | 0         | 0         | 1        | 1         | 1         |
| <b>SAD/DES6</b> | 0         | 1         | 0        | 1         | 2         |
| <b>SAD/FAB2</b> | 1         | 0         | 0        | 1         | 4         |
| <b>TGD1</b>     | 1         | 0         | 0        | 1         | 1         |
| <b>WRI1</b>     | 3         | 1         | 0        | 4         | 5         |
| <b>WRI3</b>     | 2         | 2         | 0        | 4         | 4         |
| <b>Sum</b>      | <b>31</b> | <b>21</b> | <b>1</b> | <b>53</b> | <b>69</b> |

---



Table S15. Predicted non-coding RNAs in pecan genome assembly (version 2.0).

| <b>Type</b> | <b>Copy number</b> | <b>Average length (bp)</b> | <b>Total length (bp)</b> | <b>% of genome</b> |
|-------------|--------------------|----------------------------|--------------------------|--------------------|
| miRNA       | 121                | 126.8                      | 15,343                   | 0.0024             |
| tRNA        | 565                | 74.86                      | 42,295                   | 0.0066             |
| rRNA        | 414                | 180.32                     | 74,651                   | 0.0117             |
|             | 18S                | 82                         | 505.44                   | 0.0065             |
| rRNA        | 28S                | 69                         | 107.87                   | 0.0012             |
|             | 5.8S               | 21                         | 122.29                   | 0.0004             |
|             | 5S                 | 242                        | 95.84                    | 0.0036             |
| snRNA       | 1,318              | 109.55                     | 144,382                  | 0.0227             |
|             | CD-box             | 1,118                      | 105.23                   | 0.0185             |
|             | HACA-box           | 52                         | 124.08                   | 0.001              |
|             | splicing           | 147                        | 137.13                   | 0.0032             |

Table S16. Statistics of synteny and genes in Cil\_V. 2.0 and gap-free 'Pawnee' assembly by Lovell et al. (2021).

| <b>Chromosome Pair</b> | <b>Sub-genome</b> | <b>Chromosome<sup>a</sup></b> | <b>Gene Number<sup>a</sup></b> | <b>Chromosome<sup>b</sup></b> | <b>Gene Number<sup>b</sup></b> | <b>Genes in Block<sup>b</sup></b> | <b>Block Number</b> | <b>Average gene number/Block</b> |
|------------------------|-------------------|-------------------------------|--------------------------------|-------------------------------|--------------------------------|-----------------------------------|---------------------|----------------------------------|
| PAIR1                  | sub A             | CHR09                         | 3,011                          | chr1                          | 3,080                          | 2,001                             | 16                  | 125.06                           |
|                        | sub B             | CHR01                         | 1,984                          | chr2                          | 1,995                          | 1,422                             | 3                   | 474.00                           |
| PAIR2                  | sub A             | CHR10                         | 2,967                          | chr3                          | 2,845                          | 1,967                             | 10                  | 196.70                           |
|                        | sub B             | CHR02                         | 1,911                          | chr4                          | 1,984                          | 1,292                             | 9                   | 143.56                           |
| PAIR3                  | sub A             | CHR11                         | 2,561                          | chr5                          | 2,644                          | 1,790                             | 7                   | 255.71                           |
|                        | sub B             | CHR03                         | 1,626                          | chr6                          | 1,772                          | 1,147                             | 10                  | 114.70                           |
| PAIR7                  | sub A             | CHR15                         | 2,305                          | chr7                          | 2,377                          | 1,781                             | 3                   | 593.67                           |
|                        | sub B             | CHR07                         | 2,003                          | chr8                          | 1,830                          | 1,255                             | 8                   | 156.88                           |
| PAIR6                  | sub A             | CHR14                         | 2,173                          | chr9                          | 2,253                          | 1,569                             | 9                   | 174.33                           |
|                        | sub B             | CHR06                         | 1,836                          | chr10                         | 1,677                          | 1,126                             | 8                   | 140.75                           |
| PAIR5                  | sub A             | CHR13                         | 2,106                          | chr11                         | 2,110                          | 1,353                             | 10                  | 135.30                           |
|                        | sub B             | CHR05                         | 1,385                          | chr12                         | 1,430                          | 955                               | 7                   | 136.43                           |
| PAIR8                  | sub A             | CHR16                         | 1,431                          | chr13                         | 1,802                          | 1,016                             | 15                  | 67.73                            |
|                        | sub B             | CHR08                         | 1,493                          | chr14                         | 1,374                          | 939                               | 6                   | 156.50                           |
| PAIR4                  | sub A             | CHR12                         | 1,944                          | chr15                         | 1,864                          | 1,097                             | 9                   | 121.89                           |
|                        | sub B             | CHR04                         | 1,368                          | chr16                         | 1,197                          | 794                               | 6                   | 132.33                           |
| Sum                    |                   | 16                            | 32,104                         | 16                            | 32,234                         | 21,504                            | 136                 | 158.12                           |

Note: <sup>a</sup>, Chromosome number and genes in Cil\_V. 2.0 assembly; <sup>b</sup>, Chromosome number and genes in the gap-free 'Pawnee' assembly by Lovell et al. (2021).

Table S17. Statistics of sub-genomes features.

| <b>Chromosome Pair</b> | <b>Sub-genome</b> | <b>Chromosome</b> | <b>Chromosome length</b> | <b>Gene number</b> | <b>TE</b> | <b>Identity</b> | <b>Ka/Ks</b> |
|------------------------|-------------------|-------------------|--------------------------|--------------------|-----------|-----------------|--------------|
| PAIR1                  | subA              | CHR09             | 55,745,374               | 3,011              | 0.446     | 78.64           | 0.2261       |
|                        | subB              | CHR01             | 35,734,486               | 1,984              | 0.449     | 78.33           | 0.2298       |
| PAIR2                  | subA              | CHR10             | 55,374,445               | 2,967              | 0.451     | 77.72           | 0.2499       |
|                        | subB              | CHR02             | 38,784,058               | 1,911              | 0.474     | 75.99           | 0.2507       |
| PAIR3                  | subA              | CHR11             | 45,985,284               | 2,561              | 0.452     | 77.79           | 0.2419       |
|                        | subB              | CHR03             | 30,933,461               | 1,626              | 0.468     | 76.95           | 0.2524       |
| PAIR4                  | subA              | CHR12             | 44,801,196               | 1,944              | 0.511     | 78.73           | 0.2456       |
|                        | subB              | CHR04             | 29,925,508               | 1,368              | 0.502     | 77.17           | 0.2531       |
| PAIR5                  | subA              | CHR13             | 40,882,215               | 2,106              | 0.469     | 77.48           | 0.2602       |
|                        | subB              | CHR05             | 20,838,255               | 1,385              | 0.413     | 76.17           | 0.2600       |
| PAIR6                  | subA              | CHR14             | 39,152,115               | 2,173              | 0.44      | 79.06           | 0.2396       |
|                        | subB              | CHR06             | 36,373,273               | 1,836              | 0.47      | 77.20           | 0.2551       |
| PAIR7                  | subA              | CHR15             | 38,648,230               | 2,305              | 0.409     | 76.99           | 0.2475       |
|                        | subB              | CHR07             | 38,592,383               | 2,003              | 0.467     | 75.24           | 0.2769       |
| PAIR8                  | subA              | CHR16             | 25,295,717               | 1,431              | 0.436     | 78.84           | 0.2540       |
|                        | subB              | CHR08             | 31,550,154               | 1,493              | 0.489     | 77.40           | 0.2627       |

Table S18. Statistics of transcription factor families among pecan, walnut and bayberry.

| TF_family    | <i>Cil_sub A</i> | <i>Cil_sub B</i> | <i>Cil_Scaffold</i> | <i>Cil sum</i> | <i>Jre_sub A</i> | <i>Jre_sub B</i> | <i>Jre sum</i> | <i>Mru</i> | <i>Ath</i> | Included_domains                                  | P-value(chi-square test) |
|--------------|------------------|------------------|---------------------|----------------|------------------|------------------|----------------|------------|------------|---------------------------------------------------|--------------------------|
| ABI3VP1      | 23               | 17               | 2                   | 42             | 20               | 17               | 37             | 60         | 89         | B3                                                | 0.068                    |
| AP2-EREBP    | 105              | 85               | 3                   | 193            | 109              | 93               | 202            | 128        | 145        | AP2                                               | 1                        |
| ARF          | 20               | 10               | 1                   | 31             | 17               | 16               | 33             | 18         | 23         | Auxin_resp                                        | 1                        |
| ARR-B        | 7                | 4                | 1                   | 12             | 7                | 5                | 12             | 9          | 13         | G2-like,Myb_DNA-binding,Response_reg              | 0.9827                   |
| Alfin-like   | 11               | 12               | 2                   | 25             | 10               | 12               | 22             | 27         | 19         | Alfin-like                                        | 0.872                    |
| BBR/BPC      | 5                | 6                | 0                   | 11             | 6                | 5                | 11             | 6          | 8          | GAGA_bind                                         | 1                        |
| BES1         | 5                | 4                | 1                   | 10             | 4                | 5                | 9              | 6          | 8          | DUF822                                            | 1                        |
| BSD          | 5                | 7                | 1                   | 13             | 6                | 6                | 12             | 10         | 12         | BSD                                               | 1                        |
| C2C2-CO-like | 9                | 4                | 0                   | 13             | 10               | 6                | 16             | 7          | 17         | CCT,zf-B_box                                      | 0.8128                   |
| C2C2-Dof     | 22               | 19               | 3                   | 44             | 26               | 22               | 48             | 27         | 36         | zf-Dof                                            | 1                        |
| C2C2-GATA    | 18               | 13               | 0                   | 31             | 18               | 15               | 33             | 30         | 30         | GATA                                              | 0.6565                   |
| C2C2-YABBY   | 5                | 4                | 0                   | 9              | 6                | 5                | 11             | 9          | 7          | YABBY                                             | 0.8887                   |
| C2H2         | 39               | 38               | 4                   | 81             | 46               | 46               | 92             | 55         | 65         | zf-C2H2                                           | 0.8879                   |
| C3H          | 37               | 28               | 6                   | 71             | 46               | 32               | 78             | 49         | 63         | zf-CCCH                                           | 0.8617                   |
| CAMTA        | 3                | 2                | 0                   | 5              | 5                | 4                | 9              | 7          | 5          | CG-1,IQ                                           | 0.5713                   |
| CCAAT        | 16               | 19               | 0                   | 35             | 12               | 14               | 26             | 22         | 43         | CBFB_NFYA,CBFD_NFYB_HMF,CCAA<br>T-Dr1,NF-YB,NF-YC | 1                        |
| CPP          | 4                | 3                | 0                   | 7              | 6                | 4                | 10             | 5          | 10         | TCR                                               | 0.7437                   |
| CSD          | 2                | 1                | 0                   | 3              | 3                | 1                | 4              | 4          | 3          | CSD                                               | 0.815                    |
| DBP          | 0                | 0                | 0                   | 0              | 1                | 0                | 1              | 1          | 1          | DNC,PP2C                                          | 0.9268                   |
| E2F-DP       | 7                | 3                | 1                   | 11             | 7                | 4                | 11             | 7          | 8          | E2F_TDP                                           | 1                        |
| EIL          | 3                | 2                | 1                   | 6              | 4                | 2                | 6              | 5          | 6          | EIN3                                              | 0.9774                   |

|              |     |     |    |     |     |     |     |     |     |                                  |                 |
|--------------|-----|-----|----|-----|-----|-----|-----|-----|-----|----------------------------------|-----------------|
| FAR1         | 154 | 107 | 3  | 264 | 22  | 18  | 40  | 26  | 18  | FAR1                             | <b>1.39E-09</b> |
| FHA          | 10  | 8   | 1  | 19  | 12  | 9   | 21  | 14  | 16  | FHA                              | 0.9653          |
| G2-like      | 28  | 23  | 2  | 53  | 33  | 26  | 59  | 36  | 43  | G2-like                          | 0.8481          |
| GRAS         | 41  | 29  | 3  | 73  | 50  | 27  | 77  | 49  | 34  | GRAS                             | 0.8219          |
| GRF          | 5   | 8   | 0  | 13  | 8   | 7   | 15  | 10  | 9   | QLQ,WRC                          | 1               |
| GeBP         | 3   | 4   | 0  | 7   | 4   | 4   | 8   | 7   | 22  | DUF573                           | 0.2378          |
| HB           | 9   | 7   | 0  | 16  | 9   | 6   | 15  | 8   | 8   | Homeobox,KNOX1,KNOX2             | 0.7427          |
| HRT          | 1   | 0   | 0  | 1   | 1   | 0   | 1   | 0   | 2   | HRT                              | 1               |
| HSF          | 16  | 13  | 2  | 31  | 19  | 15  | 34  | 18  | 24  | HSF_DNA-bind                     | 1               |
| LFY          | 0   | 1   | 0  | 1   | 0   | 1   | 1   | 1   | 1   | FLO_LFY                          | 1               |
| LIM          | 12  | 5   | 0  | 17  | 9   | 6   | 15  | 11  | 12  | LIM                              | 1               |
| LOB          | 26  | 24  | 2  | 52  | 29  | 22  | 51  | 34  | 43  | DUF260                           | 1               |
| MADS         | 38  | 29  | 1  | 68  | 41  | 25  | 66  | 65  | 108 | SRF-TF                           | 0.2382          |
| MYB          | 192 | 157 | 14 | 363 | 205 | 179 | 384 | 247 | 274 | Myb_DNA-binding                  | 1               |
| MYB-related  | 159 | 130 | 12 | 301 | 167 | 148 | 315 | 205 | 227 | Myb_DNA-binding                  | 1               |
| NAC          | 72  | 51  | 4  | 127 | 70  | 56  | 126 | 75  | 114 | NAM                              | 1               |
| NOZZLE       | 2   | 2   | 0  | 4   | 1   | 1   | 2   | 2   | 3   | NOZZLE_Angio                     | 0.9087          |
| OFP          | 15  | 7   | 3  | 25  | 17  | 9   | 26  | 13  | 19  | Ovate                            | 1               |
| PBF-2-like   | 2   | 1   | 0  | 3   | 1   | 0   | 1   | 2   | 3   | Whirly                           | 1               |
| PLATZ        | 12  | 9   | 1  | 22  | 7   | 4   | 11  | 16  | 12  | PLATZ                            | 0.5853          |
| RWP-RK       | 7   | 4   | 1  | 12  | 6   | 5   | 11  | 9   | 15  | RWP-RK                           | 0.8289          |
| S1Fa-like    | 2   | 0   | 0  | 2   | 2   | 1   | 3   | 2   | 3   | S1FA                             | 0.8413          |
| SAP          | 1   | 0   | 0  | 1   | 1   | 0   | 1   | 2   | 1   | STER_AP                          | 1               |
| SBP          | 13  | 16  | 2  | 31  | 16  | 12  | 28  | 16  | 17  | SBP                              | 0.6644          |
| SRS          | 6   | 6   | 0  | 12  | 5   | 6   | 11  | 5   | 11  | DUF702                           | 1               |
| Sigma70-like | 1   | 6   | 0  | 7   | 1   | 6   | 7   | 5   | 6   | Sigma70_r2,Sigma70_r3,Sigma70_r4 | 1               |

|          |    |    |   |     |    |    |     |     |     |                        |        |
|----------|----|----|---|-----|----|----|-----|-----|-----|------------------------|--------|
| TAZ      | 3  | 3  | 0 | 6   | 3  | 4  | 7   | 4   | 5   | zf-TAZ                 | 1      |
| TCP      | 12 | 19 | 2 | 33  | 18 | 19 | 37  | 17  | 24  | TCP                    | 1      |
| TIG      | 4  | 5  | 0 | 9   | 4  | 5  | 9   | 6   | 4   | TIG                    | 0.9576 |
| TUB      | 5  | 5  | 2 | 12  | 6  | 6  | 12  | 10  | 11  | Tub                    | 0.9827 |
| Tify     | 8  | 8  | 1 | 17  | 11 | 12 | 23  | 13  | 15  | tify                   | 0.7606 |
| Trihelix | 24 | 20 | 1 | 45  | 25 | 23 | 48  | 33  | 30  | trihelix               | 1      |
| ULT      | 2  | 1  | 0 | 3   | 4  | 1  | 5   | 2   | 2   | ULT                    | 1      |
| VARL     | 1  | 2  | 0 | 3   | 1  | 2  | 3   | 1   | 3   | VARL                   | 1      |
| VOZ      | 5  | 2  | 1 | 8   | 3  | 3  | 6   | 3   | 5   | VOZ                    | 0.9053 |
| WRKY     | 45 | 39 | 3 | 87  | 51 | 40 | 91  | 57  | 73  | WRKY                   | 0.9704 |
| bHLH     | 91 | 74 | 6 | 171 | 97 | 85 | 182 | 111 | 141 | HLH                    | 0.9583 |
| bZIP     | 19 | 17 | 0 | 36  | 21 | 19 | 40  | 24  | 22  | bZIP_1,bZIP_2,bZIP_Maf | 1      |
| mTERF    | 19 | 27 | 2 | 48  | 22 | 30 | 52  | 33  | 36  | mTERF                  | 1      |
| zf-HD    | 9  | 6  | 2 | 17  | 11 | 7  | 18  | 11  | 17  | ZF-HD_dimer            | 1      |

Note: *Jre*, *Juglans regia* (walnut); *Mru*, *Myrica rubra* (bayberry); *Cil*, *Carya illinoensis* (pecan).

Table S19. Information of samples for whole genome re-sequencing.

| Sample ID      | Plant ID | Scab resistance* | Source** | Sampling location                               | Population*** |
|----------------|----------|------------------|----------|-------------------------------------------------|---------------|
| Barton         | ML11     | 1                | Foreign  | China: Zhejiang A&F University campus, Hangzhou | R             |
| Melrose        | HL35     | 1                | Foreign  | China: Zhejiang A&F University campus, Hangzhou | R             |
| Osage          | HL16     | 1                | Foreign  | China: Paiyashan Farm, Hunan                    | R             |
| Peruque        | HL38     | 1                | Foreign  | China: Zhejiang A&F University campus, Hangzhou | R             |
| PoSey          | HL30     | 1                | Foreign  | China: Zhejiang A&F University campus, Hangzhou | R             |
| Pvilop         | HL32     | 1                | Foreign  | China: Paiyashan Farm, Hunan                    | R             |
| Surprize       | HL25     | 1                | Foreign  | China: Zhejiang A&F University campus, Hangzhou | R             |
| Woodroof       | ML38     | 1                | Foreign  | China: Zhejiang A&F University campus, Hangzhou | R             |
| Owens-1        | ML32     | 1                | Foreign  | China: Zhejiang A&F University campus, Hangzhou | R             |
| Yalin13        | YL13     | 1                | Domestic | China: Jing'an, Jiangxi                         | R             |
| Yalin30        | YL30     | 1                | Domestic | China: Jing'an, Jiangxi                         | R             |
| Farley         | ML20     | 2                | Foreign  | China: Zhejiang A&F University campus, Hangzhou | R             |
| Mandan         | ML25     | 2.3              | Foreign  | China: Zhejiang A&F University campus, Hangzhou | S             |
| Caddo          | ML13     | 3                | Foreign  | China: Zhejiang A&F University campus, Hangzhou | S             |
| Dependable     | ML1      | 3                | Foreign  | China: Zhejiang A&F University campus, Hangzhou | S             |
| Forkert        | ML21     | 3                | Foreign  | China: Zhejiang A&F University campus, Hangzhou | S             |
| Kiowa          | ML23     | 3                | Foreign  | China: Zhejiang A&F University campus, Hangzhou | S             |
| Oconee         | HL17     | 3                | Foreign  | China: Paiyashan Farm, Hunan                    | S             |
| Stuart         | ML5      | 3                | Foreign  | China: Zhejiang A&F University campus, Hangzhou | S             |
| Cheyenne       | HL12     | 4                | Foreign  | China: Paiyashan Farm, Hunan                    | S             |
| Hirschi/Steuck | HL29     | 4                | Foreign  | China: Zhejiang A&F University campus, Hangzhou | S             |
| Mahan          | ZL57     | 4                | Foreign  | China: Zhejiang A&F University campus, Hangzhou | S             |
| Moore          | ML29     | 4                | Foreign  | China: Zhejiang A&F University campus, Hangzhou | S             |

|          |        |      |         |                                                 |   |
|----------|--------|------|---------|-------------------------------------------------|---|
| Schley   | ML6    | 4    | Foreign | China: Zhejiang A&F University campus, Hangzhou | S |
| Shawnee  | ZL59   | 4    | Foreign | China: Zhejiang A&F University campus, Hangzhou | S |
| Shoshoni | ML34   | 4    | Foreign | China: Zhejiang A&F University campus, Hangzhou | S |
| Tejas    | ZL60   | 4    | Foreign | China: Zhejiang A&F University campus, Hangzhou | S |
| Woodard  | ML37   | 4    | Foreign | China: Zhejiang A&F University campus, Hangzhou | S |
| VC1-68   | VC1-68 | 4    | Foreign | USA: NCGR Provenance Orchards, Somerville       | S |
| Excell   | ML3    | 1    | Foreign | China: Zhejiang A&F University campus, Hangzhou | R |
| Excell   | ML3-2  | 1    | Foreign | China: Zhejiang A&F University campus, Hangzhou | R |
| Excell   | ML3-3  | 1    | Foreign | China: Zhejiang A&F University campus, Hangzhou | R |
| Excell   | ML3-4  | 1    | Foreign | China: Zhejiang A&F University campus, Hangzhou | R |
| Excell   | ML3-5  | 1    | Foreign | China: Zhejiang A&F University campus, Hangzhou | R |
| Excell   | ML3-6  | 1    | Foreign | China: Zhejiang A&F University campus, Hangzhou | R |
| Excell   | ML3-7  | 1    | Foreign | China: Zhejiang A&F University campus, Hangzhou | R |
| Excell   | ML3-8  | 1    | Foreign | China: Zhejiang A&F University campus, Hangzhou | R |
| Excell   | ML3-9  | 1    | Foreign | China: Zhejiang A&F University campus, Hangzhou | R |
| Excell   | ML3-11 | 1    | Foreign | China: Zhejiang A&F University campus, Hangzhou | R |
| Excell   | ML3-12 | 1    | Foreign | China: Zhejiang A&F University campus, Hangzhou | R |
| Elliott  | ML7    | 1.67 | Foreign | China: Zhejiang A&F University campus, Hangzhou | R |
| Elliott  | ML7-4  | 1.67 | Foreign | China: Zhejiang A&F University campus, Hangzhou | R |
| Elliott  | ML7-6  | 1.67 | Foreign | China: Zhejiang A&F University campus, Hangzhou | R |
| Elliott  | ML7-7  | 1.67 | Foreign | China: Zhejiang A&F University campus, Hangzhou | R |
| Elliott  | ML7-8  | 1.67 | Foreign | China: Zhejiang A&F University campus, Hangzhou | R |
| Elliott  | ML7-9  | 1.67 | Foreign | China: Zhejiang A&F University campus, Hangzhou | R |
| Elliott  | ML7-10 | 1.67 | Foreign | China: Zhejiang A&F University campus, Hangzhou | R |
| Sumner   | ML8    | 2.67 | Foreign | China: Zhejiang A&F University campus, Hangzhou | S |
| Sumner   | ML8-2  | 2.67 | Foreign | China: Zhejiang A&F University campus, Hangzhou | S |



|           |         |      |         |                                                 |   |
|-----------|---------|------|---------|-------------------------------------------------|---|
| Sumner    | ML8-3   | 2.67 | Foreign | China: Zhejiang A&F University campus, Hangzhou | S |
| Sumner    | ML8-4   | 2.67 | Foreign | China: Zhejiang A&F University campus, Hangzhou | S |
| Sumner    | ML8-6   | 2.67 | Foreign | China: Zhejiang A&F University campus, Hangzhou | S |
| Sumner    | ML8-7   | 2.67 | Foreign | China: Zhejiang A&F University campus, Hangzhou | S |
| Sumner    | ML8-8   | 2.67 | Foreign | China: Zhejiang A&F University campus, Hangzhou | S |
| Sumner    | ML8-9   | 2.67 | Foreign | China: Zhejiang A&F University campus, Hangzhou | S |
| Sumner    | ML8-10  | 2.67 | Foreign | China: Zhejiang A&F University campus, Hangzhou | S |
| Sumner    | ML8-11  | 2.67 | Foreign | China: Zhejiang A&F University campus, Hangzhou | S |
| Sumner    | ML8-12  | 2.67 | Foreign | China: Zhejiang A&F University campus, Hangzhou | S |
| Desirable | ML9     | 4    | Foreign | China: Zhejiang A&F University campus, Hangzhou | S |
| Desirable | ML9-2   | 4    | Foreign | China: Zhejiang A&F University campus, Hangzhou | S |
| Desirable | ML9-3   | 4    | Foreign | China: Zhejiang A&F University campus, Hangzhou | S |
| Desirable | ML9-4   | 4    | Foreign | China: Zhejiang A&F University campus, Hangzhou | S |
| Desirable | ML9-5   | 4    | Foreign | China: Zhejiang A&F University campus, Hangzhou | S |
| Pawnee    | ZL49-1  | 4    | Foreign | China: Zhejiang A&F University campus, Hangzhou | S |
| Pawnee    | ZL49-2  | 4    | Foreign | China: Zhejiang A&F University campus, Hangzhou | S |
| Pawnee    | ZL49-3  | 4    | Foreign | China: Zhejiang A&F University campus, Hangzhou | S |
| Pawnee    | ZL49-5  | 4    | Foreign | China: Zhejiang A&F University campus, Hangzhou | S |
| Pawnee    | ZL49-6  | 4    | Foreign | China: Zhejiang A&F University campus, Hangzhou | S |
| Pawnee    | ZL49-7  | 4    | Foreign | China: Zhejiang A&F University campus, Hangzhou | S |
| Pawnee    | ZL49-8  | 4    | Foreign | China: Zhejiang A&F University campus, Hangzhou | S |
| Pawnee    | ZL49-9  | 4    | Foreign | China: Zhejiang A&F University campus, Hangzhou | S |
| Pawnee    | ZL49-10 | 4    | Foreign | China: Zhejiang A&F University campus, Hangzhou | S |
| Pawnee    | ZL49-11 | 4    | Foreign | China: Zhejiang A&F University campus, Hangzhou | S |
| Pawnee    | ZL49-13 | 4    | Foreign | China: Zhejiang A&F University campus, Hangzhou | S |
| Pawnee    | ZL49-14 | 4    | Foreign | China: Zhejiang A&F University campus, Hangzhou | S |

|                |         |   |         |                                                 |   |
|----------------|---------|---|---------|-------------------------------------------------|---|
| Pawnee         | ZL49-16 | 4 | Foreign | China: Zhejiang A&F University campus, Hangzhou | S |
| Pawnee         | ZL49-17 | 4 | Foreign | China: Zhejiang A&F University campus, Hangzhou | S |
| Sioux          | HL8     | 4 | Foreign | China: Zhejiang A&F University campus, Hangzhou | S |
| Sioux          | HL42    | 4 | Foreign | China: Paiyashan Farm, Hunan                    | S |
| Western Schley | ZL58-3  | 4 | Foreign | China: Zhejiang A&F University campus, Hangzhou | S |
| Western Schley | ZL58-4  | 4 | Foreign | China: Zhejiang A&F University campus, Hangzhou | S |
| Western Schley | ZL58    | 4 | Foreign | China: Zhejiang A&F University campus, Hangzhou | S |
| Western Schley | ZL58-11 | 4 | Foreign | China: Zhejiang A&F University campus, Hangzhou | S |
| Western Schley | ZL58-12 | 4 | Foreign | China: Zhejiang A&F University campus, Hangzhou | S |
| Western Schley | ZL58-13 | 4 | Foreign | China: Zhejiang A&F University campus, Hangzhou | S |
| Western Schley | ZL58-15 | 4 | Foreign | China: Zhejiang A&F University campus, Hangzhou | S |

Note: \*, the grade of pecan scab resistance were assessed by integrating the record from XXX. \*\*, "Foreign" indicates the original germplasms were introduced from outside China and "Domestic" means the accessions were collected from seed-germinated seedling in China. \*\*\*, the populations were defined based on the pecan scab resistance grade: R, resistance population with the grade  $\leq 2$ ; S, susceptible population with the grade  $> 2$ .

Table S20. Statistics of the resequencing data and the SNPs for each accessions.

| Sample ID      | Plant ID | Raw_reads<br>(M) | Raw_bases<br>(Gb) | Clean_reads<br>(M) | Clean_bases<br>(Gb) | Clean_ratio(%) | Clean_coverage<br>(X) | Q20(%) | Q30(%) | GC(%) |
|----------------|----------|------------------|-------------------|--------------------|---------------------|----------------|-----------------------|--------|--------|-------|
| Barton         | ML11     | 190.80           | 19.08             | 190.12             | 19.01               | 99.64          | 27.50                 | 98.47  | 94.91  | 37.09 |
| Melrose        | HL35     | 202.54           | 20.25             | 201.85             | 20.19               | 99.66          | 29.21                 | 97.09  | 91.73  | 37.49 |
| Osage          | HL16     | 237.93           | 23.79             | 235.60             | 23.56               | 99.02          | 34.08                 | 98.80  | 94.91  | 37.66 |
| Peruque        | HL38     | 169.97           | 17.00             | 169.41             | 16.94               | 99.67          | 24.51                 | 97.19  | 92.05  | 37.17 |
| PoSey          | HL30     | 185.78           | 18.58             | 185.12             | 18.51               | 99.64          | 26.78                 | 97.03  | 91.58  | 37.61 |
| Pvilop         | HL32     | 188.53           | 18.85             | 186.61             | 18.66               | 98.98          | 26.99                 | 98.56  | 94.99  | 36.83 |
| Surprize       | HL25     | 192.61           | 19.26             | 192.09             | 19.21               | 99.73          | 27.79                 | 96.97  | 91.36  | 37.39 |
| Woodroof       | ML38     | 203.03           | 20.30             | 202.10             | 20.21               | 99.54          | 29.24                 | 98.45  | 94.62  | 36.95 |
| Owens-1        | ML32     | 173.03           | 17.30             | 172.27             | 17.23               | 99.56          | 24.92                 | 98.52  | 94.90  | 37.58 |
| Yalin13        | YL13     | 227.62           | 22.76             | 226.89             | 22.69               | 99.68          | 32.82                 | 97.88  | 93.66  | 37.41 |
| Yalin30        | YL30     | 179.08           | 17.91             | 178.60             | 17.86               | 99.73          | 25.84                 | 97.81  | 93.28  | 37.14 |
| Farley         | ML20     | 168.36           | 16.84             | 167.87             | 16.79               | 99.71          | 24.29                 | 98.44  | 94.53  | 37.05 |
| Mandan         | ML25     | 172.26           | 17.23             | 171.73             | 17.17               | 99.69          | 24.84                 | 98.49  | 94.77  | 37.25 |
| Caddo          | ML13     | 248.04           | 24.80             | 246.72             | 24.67               | 99.47          | 35.69                 | 98.73  | 96.10  | 38.69 |
| Dependable     | ML1      | 222.27           | 22.23             | 221.56             | 22.16               | 99.68          | 32.06                 | 98.70  | 95.70  | 37.03 |
| Forkert        | ML21     | 183.42           | 18.34             | 182.89             | 18.29               | 99.71          | 26.46                 | 98.53  | 94.91  | 37.01 |
| Kiowa          | ML23     | 185.02           | 18.50             | 184.47             | 18.45               | 99.70          | 26.69                 | 98.34  | 94.07  | 37.03 |
| Oconee         | HL17     | 193.78           | 19.38             | 191.95             | 19.19               | 99.05          | 27.76                 | 98.51  | 94.74  | 37.01 |
| Stuart         | ML5      | 159.09           | 15.91             | 158.64             | 15.86               | 99.72          | 22.94                 | 98.62  | 95.60  | 37.26 |
| Cheyenne       | HL12     | 175.20           | 17.52             | 173.82             | 17.38               | 99.21          | 25.14                 | 98.42  | 94.61  | 37.15 |
| Hirschi/Steuck | HL29     | 150.11           | 15.01             | 149.70             | 14.97               | 99.73          | 21.66                 | 96.98  | 91.40  | 37.53 |
| Mahan          | ZL57     | 159.84           | 15.98             | 159.42             | 15.94               | 99.74          | 23.06                 | 98.09  | 94.31  | 37.96 |

|          |        |        |       |        |       |       |       |       |       |       |
|----------|--------|--------|-------|--------|-------|-------|-------|-------|-------|-------|
| Moore    | ML29   | 185.77 | 18.58 | 184.87 | 18.49 | 99.52 | 26.75 | 98.52 | 94.72 | 37.01 |
| Schley   | ML6    | 198.88 | 19.89 | 198.20 | 19.82 | 99.66 | 28.67 | 98.61 | 95.88 | 37.22 |
| Shawnee  | ZL59   | 264.27 | 26.43 | 263.20 | 26.32 | 99.60 | 38.07 | 98.37 | 94.44 | 37.64 |
| Shoshoni | ML34   | 170.75 | 17.07 | 169.97 | 17.00 | 99.55 | 24.59 | 98.54 | 95.18 | 37.39 |
| Tejas    | ZL60   | 148.16 | 14.82 | 147.24 | 14.72 | 99.38 | 21.29 | 98.02 | 93.71 | 44.20 |
| Woodard  | ML37   | 169.32 | 16.93 | 168.55 | 16.85 | 99.55 | 24.38 | 98.59 | 95.16 | 37.23 |
| VC1-68   | VC1-68 | 226.99 | 22.70 | 225.88 | 22.59 | 99.51 | 32.68 | 98.26 | 94.16 | 40.06 |
| Excell   | ML3    | 199.76 | 19.98 | 199.22 | 19.92 | 99.73 | 28.82 | 98.65 | 95.48 | 36.72 |
| Excell   | ML3-2  | 151.03 | 15.10 | 149.99 | 15.00 | 99.32 | 21.70 | 98.53 | 94.95 | 36.02 |
| Excell   | ML3-3  | 179.32 | 17.93 | 178.84 | 17.88 | 99.73 | 25.87 | 98.17 | 94.75 | 37.02 |
| Excell   | ML3-4  | 234.32 | 23.43 | 233.75 | 23.37 | 99.75 | 33.81 | 98.62 | 95.49 | 36.61 |
| Excell   | ML3-5  | 190.18 | 19.02 | 189.92 | 18.99 | 99.87 | 27.47 | 98.57 | 94.93 | 37.38 |
| Excell   | ML3-6  | 152.70 | 15.27 | 152.56 | 15.26 | 99.90 | 22.07 | 98.56 | 94.72 | 36.94 |
| Excell   | ML3-7  | 166.64 | 16.66 | 166.47 | 16.65 | 99.90 | 24.09 | 98.50 | 94.55 | 37.25 |
| Excell   | ML3-8  | 179.47 | 17.95 | 179.29 | 17.93 | 99.90 | 25.94 | 98.59 | 94.97 | 37.21 |
| Excell   | ML3-9  | 192.67 | 19.27 | 192.36 | 19.24 | 99.84 | 27.83 | 98.65 | 95.33 | 37.00 |
| Excell   | ML3-11 | 214.80 | 21.48 | 214.52 | 21.45 | 99.87 | 31.03 | 98.60 | 95.05 | 37.03 |
| Excell   | ML3-12 | 195.12 | 19.51 | 194.80 | 19.48 | 99.84 | 28.18 | 98.64 | 95.41 | 36.91 |
| Elliott  | ML7    | 202.68 | 20.27 | 202.05 | 20.21 | 99.69 | 29.24 | 98.71 | 95.96 | 37.32 |
| Elliott  | ML7-4  | 190.73 | 19.07 | 190.44 | 19.04 | 99.85 | 27.54 | 98.46 | 94.83 | 37.14 |
| Elliott  | ML7-6  | 151.99 | 15.20 | 151.79 | 15.18 | 99.87 | 21.96 | 98.39 | 94.53 | 37.45 |
| Elliott  | ML7-7  | 193.29 | 19.33 | 192.97 | 19.30 | 99.83 | 27.92 | 98.41 | 94.53 | 36.95 |
| Elliott  | ML7-8  | 197.55 | 19.76 | 197.27 | 19.73 | 99.85 | 28.54 | 98.47 | 94.75 | 36.75 |
| Elliott  | ML7-9  | 211.40 | 21.14 | 211.00 | 21.10 | 99.81 | 30.52 | 98.54 | 95.20 | 36.90 |
| Elliott  | ML7-10 | 174.58 | 17.46 | 174.26 | 17.43 | 99.82 | 25.21 | 98.55 | 95.25 | 36.92 |
| Sumner   | ML8    | 200.54 | 20.05 | 200.03 | 20.00 | 99.75 | 28.93 | 98.64 | 95.31 | 37.62 |

|           |         |        |       |        |       |       |       |       |       |       |
|-----------|---------|--------|-------|--------|-------|-------|-------|-------|-------|-------|
| Sumner    | ML8-2   | 162.36 | 16.24 | 161.90 | 16.19 | 99.72 | 23.42 | 97.62 | 92.08 | 37.27 |
| Sumner    | ML8-3   | 142.77 | 14.28 | 141.83 | 14.18 | 99.34 | 20.51 | 97.59 | 92.69 | 43.50 |
| Sumner    | ML8-4   | 173.06 | 17.31 | 172.38 | 17.24 | 99.61 | 24.94 | 98.38 | 94.16 | 36.47 |
| Sumner    | ML8-6   | 249.19 | 24.92 | 247.15 | 24.71 | 99.15 | 35.75 | 97.52 | 92.34 | 37.80 |
| Sumner    | ML8-7   | 165.17 | 16.52 | 164.73 | 16.47 | 99.74 | 23.83 | 97.67 | 92.30 | 37.12 |
| Sumner    | ML8-8   | 165.01 | 16.50 | 164.56 | 16.46 | 99.73 | 23.81 | 97.73 | 92.75 | 38.47 |
| Sumner    | ML8-9   | 236.38 | 23.64 | 235.56 | 23.56 | 99.65 | 34.08 | 96.86 | 90.98 | 37.28 |
| Sumner    | ML8-10  | 234.48 | 23.45 | 233.70 | 23.37 | 99.67 | 33.81 | 96.88 | 91.03 | 37.49 |
| Sumner    | ML8-11  | 153.29 | 15.33 | 152.79 | 15.28 | 99.67 | 22.10 | 96.76 | 90.70 | 37.79 |
| Sumner    | ML8-12  | 376.17 | 37.62 | 374.53 | 37.45 | 99.56 | 54.17 | 98.50 | 94.89 | 38.88 |
| Desirable | ML9     | 185.56 | 18.56 | 185.06 | 18.51 | 99.73 | 26.78 | 98.61 | 95.07 | 37.44 |
| Desirable | ML9-2   | 155.46 | 15.55 | 155.05 | 15.51 | 99.74 | 22.44 | 97.65 | 92.21 | 37.79 |
| Desirable | ML9-3   | 126.63 | 12.66 | 126.31 | 12.63 | 99.75 | 18.27 | 97.54 | 91.85 | 37.36 |
| Desirable | ML9-4   | 127.31 | 12.73 | 127.02 | 12.70 | 99.77 | 18.37 | 97.66 | 92.34 | 38.05 |
| Desirable | ML9-5   | 202.03 | 20.20 | 200.85 | 20.09 | 99.42 | 29.06 | 98.46 | 95.08 | 40.67 |
| Pawnee    | ZL49-1  | 194.92 | 19.49 | 193.96 | 19.40 | 99.51 | 28.06 | 98.33 | 94.39 | 37.72 |
| Pawnee    | ZL49-2  | 221.20 | 22.12 | 220.25 | 22.02 | 99.57 | 31.85 | 98.42 | 94.92 | 37.59 |
| Pawnee    | ZL49-3  | 291.60 | 29.16 | 290.82 | 29.08 | 99.73 | 42.07 | 98.19 | 94.59 | 38.83 |
| Pawnee    | ZL49-5  | 192.43 | 19.24 | 191.92 | 19.19 | 99.74 | 27.76 | 98.20 | 94.43 | 37.34 |
| Pawnee    | ZL49-6  | 152.36 | 15.24 | 151.95 | 15.19 | 99.73 | 21.97 | 98.25 | 94.69 | 37.43 |
| Pawnee    | ZL49-7  | 159.84 | 15.98 | 159.37 | 15.94 | 99.71 | 23.06 | 98.09 | 94.09 | 37.42 |
| Pawnee    | ZL49-8  | 134.35 | 13.43 | 134.01 | 13.40 | 99.75 | 19.38 | 98.15 | 94.38 | 37.80 |
| Pawnee    | ZL49-9  | 172.45 | 17.24 | 171.95 | 17.19 | 99.71 | 24.87 | 98.16 | 94.30 | 37.80 |
| Pawnee    | ZL49-10 | 191.63 | 19.16 | 190.99 | 19.10 | 99.67 | 27.63 | 98.15 | 94.25 | 37.98 |
| Pawnee    | ZL49-11 | 165.03 | 16.50 | 164.61 | 16.46 | 99.74 | 23.81 | 98.22 | 94.48 | 37.62 |
| Pawnee    | ZL49-13 | 159.89 | 15.99 | 159.49 | 15.95 | 99.75 | 23.07 | 98.09 | 94.21 | 37.75 |

|                |         |          |         |          |         |         |       |       |       |       |
|----------------|---------|----------|---------|----------|---------|---------|-------|-------|-------|-------|
| Pawnee         | ZL49-14 | 194.60   | 19.46   | 194.00   | 19.40   | 99.69   | 28.06 | 98.07 | 94.12 | 37.36 |
| Pawnee         | ZL49-16 | 188.31   | 18.83   | 187.66   | 18.77   | 99.65   | 27.15 | 98.13 | 94.53 | 37.27 |
| Pawnee         | ZL49-17 | 190.62   | 19.06   | 190.03   | 19.00   | 99.69   | 27.49 | 98.11 | 94.30 | 37.55 |
| Sioux          | HL8     | 224.19   | 22.42   | 223.53   | 22.35   | 99.70   | 32.33 | 96.88 | 91.08 | 37.39 |
| Sioux          | HL42    | 262.74   | 26.27   | 260.80   | 26.08   | 99.26   | 37.73 | 98.58 | 95.39 | 37.23 |
| Western Schley | ZL58    | 185.75   | 18.58   | 185.17   | 18.52   | 99.69   | 26.79 | 98.34 | 94.75 | 38.12 |
| Western Schley | ZL58-3  | 229.59   | 22.96   | 228.81   | 22.88   | 99.65   | 33.10 | 97.79 | 92.62 | 37.24 |
| Western Schley | ZL58-4  | 177.26   | 17.73   | 176.75   | 17.67   | 99.70   | 25.56 | 97.75 | 92.34 | 36.83 |
| Western Schley | ZL58-11 | 191.00   | 19.10   | 190.52   | 19.05   | 99.74   | 27.56 | 96.31 | 87.93 | 39.03 |
| Western Schley | ZL58-12 | 139.21   | 13.92   | 138.60   | 13.86   | 99.55   | 20.05 | 96.16 | 87.50 | 37.10 |
| Western Schley | ZL58-13 | 171.53   | 17.15   | 170.76   | 17.07   | 99.53   | 24.69 | 96.96 | 91.19 | 36.83 |
| Western Schley | ZL58-15 | 146.53   | 14.65   | 146.04   | 14.60   | 99.66   | 21.12 | 96.03 | 88.07 | 36.66 |
| Total          |         | 16303.12 | 1630.31 | 16244.28 | 1624.41 | 8569.52 | -     | -     | -     | -     |
| Average        |         | 189.57   | 18.96   | 188.89   | 18.89   | 99.65   | 27.32 | 98.08 | 93.85 | 37.59 |

Table S21. Parents information and estimate ancestral sources and types in subgenomes for each cultivar.

| <b>Accession</b> | <b>Subgenome A</b> | <b>Subgenome B</b> | <b>Parents (Female X Male)</b> |
|------------------|--------------------|--------------------|--------------------------------|
| Barton           | K2                 | K1                 | Moore X Success                |
| Caddo            | K1,K4,K3,K2        | K3,K1              | Brooks X Alley                 |
| Cheyenne         | K1                 | K1                 | Clark X Odom                   |
| Dependable       | K4,K2              | K4,K1              | Jewett X Success               |
| Desirable        | K4,K3              | K3,K4              | Success X Jewett               |
| Elliott          | K4,K2              | K4,K1              | Not known (Seedling)           |
| Excell           | K1,K2              | K4,K1              | Not known (Seedling)           |
| Farley           | K1,K2              | K3,K4,K1           | Not known (Seedling)           |
| Forkert          | K1,K3,K2           | K3,K1              | Success X Schley               |
| Hirschi/Steuck   | K1,K4,K3,K2        | K3,K2,K4,K1        | Not known (Seedling)           |
| Kiowa            | K1,K3,K2           | K3,K1              | Mahan X Desirable              |
| Mahan            | K3                 | K3                 | Not known (Seedling)           |
| Mandan           | K1,K3,K2           | K2,K1              | BW-1 X Osage                   |
| Melrose          | K1,K3              | K3,K2,K1           | Not known (Seedling)           |
| Moore            | K1                 | K1                 | Not known (Seedling)           |
| Oconee           | K3,K2              | K3,K1              | Schley X Barton                |
| Osage            | K1                 | K3,K4,K1           | Major X Evers                  |
| Owens-1          | K1,K4,K3,K2        | K3,K2,K4,K1        | Not known (Chance seedling)    |
| Pawnee           | K3                 | K3                 | Mohawk X Starking Hardy Giant  |
| Peruque          | K2                 | K1                 | Not known (Seedling)           |
| PoSey            | K3                 | K3                 | Not known (Seedling)           |
| Pvilop           | K1,K4,K3           | K3,K4,K1           | No record                      |
| Schley           | K4                 | K4                 | Not known (Seedling)           |
| Shawnee          | K4                 | K4                 | Schley X Barton                |
| Shoshoni         | K1                 | K1                 | Odom X Evers                   |
| Sioux            | K1,K3              | K3,K1              | Schley X Carmichael            |
| Stuart           | K3                 | K3                 | Not known (Seedling)           |
| Sumner           | K4,K3              | K3,K4              | Not known (Seedling)           |
| Surprize         | K3                 | K2                 | Not known (Chance seedling)    |
| Tejas            | K4                 | K4                 | Mahan X Risien 1               |
| VC1-68           | K1,K3              | K3,K1              | Not known (Seedling)           |
| Western Schley   | K1,K3              | K3,K2,K4,K1        | Not known (Seedling)           |
| Woodard          | K1,K2              | K3,K4,K1           | Not known (Seedling)           |
| Woodroof         | K1,K4,K3           | K3,K4,K1           | Not known (Seedling)           |
| Yalin13          | K1,K4,K3,K2        | K3,K2,K4,K1        | Not known (Seedling)           |
| Yalin30          | K1                 | K3,K4,K1           | Not known (Seedling)           |

Note: Pink=K1, Orange=K2, lake blue=K3, sky blue=K.

Table S22. Nucleotide diversity ( $\pi$ ) and pairwise population differentiation level ( $F_{st}$ ) between the pecan scab resistance and susceptible populations (100 Kb per window).

Table S23. Information of candidate genes in the selected regions (Top 5% of  $F_{st}$  and  $\pi$  ratio).

Table S24. Phenotypes of two selected regions including the protein-encoding genes of chitinases ( $CHIs$ ) and ionotropic glutamate receptors ( $GRIPs$ ).

(Tables S22-S24 are shown by separate files)

Table S25. Primers information for real-time qPCR.

| Gene ID           | Gene name       | Forward primer         | Reverse primer         | Tm | Product length (bp) |
|-------------------|-----------------|------------------------|------------------------|----|---------------------|
| Cil_09G_00199V2   | <i>CHI-1</i>    | CTAATAATGTCTCGGTGTCTG  | CATCTATCTCCTCTATGTAGCA |    | 243                 |
| Cil_09G_00200V2   | <i>CHI-2</i>    | CAACGATGTCTCAGTGTCT    | CAGCAATCTCACGCATAGA    |    | 182                 |
| Cil_15G_00015V2   | <i>GLR-1</i>    | CCACAGTTACAGTTCCAAGA   | GCCTGACTTACAACACTACT   |    | 264                 |
| Cil_15G_00016V2   | <i>GLR-2</i>    | TGATGCGAAGTGAATATGTG   | TCAAGTGAATGAGCAAGAAG   |    | 184                 |
| Cil_15G_00017V2   | <i>GLR-3</i>    | TTCCAAGAGATTCGCCAAT    | AAGCAGAGCAAGCAAGAA     |    | 209                 |
| Cil_15G_00018V2   | <i>GLR-4</i>    | GAGTTACACTGCAAGTCTGA   | ATTCTTCTGCCGAGTTGAG    |    | 191                 |
| Cil_15G_00019V2   | <i>GLR-5</i>    | AGTCTGACCTCAATCCTTAC   | CATATCCTTCTTCCGAGTTG   |    | 181                 |
| Cil_03G_00295V2   | <i>MAPKKK3</i>  | TCAACGAGGACACATACAAG   | TCTCCGATGAAGCCGATT     |    | 208                 |
| Cil_12G_00571V2   | <i>FAR-1</i>    | CCTGGCGGAGATTGATAC     | GTGGACACTTAGACAGAGAA   |    | 233                 |
| Cil_03G_00293V2   | <i>FAR-2</i>    | AGAAGAGGAGAGCATAGACT   | AAGCAAGGCATACCGTAAT    |    | 249                 |
| Internal control* | <i>18S rRNA</i> | ACATCTTACCACGATACATAAC | AACTTGCGTTCAAAGACTC    |    | 134                 |

Note: \*, 18S rRNA (NCBI accession no. AF174619.1) were used as the internal control according to Mattison et al. (2017).
