# Supplementary material for: Chromosome-scale assembly reveals asymmetric paleo-subgenome evolution and targets for the acceleration of fungal resistance breeding in the nut crop, pecan
Source: PubMed Central journal article supplement — Plant Commun. 2021 Sep 24;2(6):100247. doi: 10.1016/j.xplc.2021.100247 (PMC8577110; doi:10.1016/j.xplc.2021.100247), 2021-09-24
Supplement: mmc2.pdf [file mmc2.pdf]

Table S22. Nucleotide diversity ( $\pi$ ) and pairwise population differentiation level ( $F_{st}$ )

between the pecan scab resistance and susceptible populations (100 Kb per window).

| Chromosome | Start   | End     | Mean<br><i>F<sub>st</sub></i> | $\pi$ ratio | LABEL  |
|------------|---------|---------|-------------------------------|-------------|--------|
| chr09      | 100001  | 200000  | 0.063                         | 1.234       | normal |
| chr09      | 200001  | 300000  | 0.084                         | 1.395       | normal |
| chr09      | 300001  | 400000  | 0.117                         | 1.208       | normal |
| chr09      | 400001  | 500000  | 0.117                         | 0.987       | normal |
| chr09      | 500001  | 600000  | 0.127                         | 0.885       | normal |
| chr09      | 600001  | 700000  | 0.111                         | 0.808       | normal |
| chr09      | 700001  | 800000  | 0.076                         | 1.337       | normal |
| chr09      | 800001  | 900000  | 0.015                         | 0.941       | normal |
| chr09      | 900001  | 1000000 | 0.027                         | 0.949       | normal |
| chr09      | 1000001 | 1100000 | 0.028                         | 0.920       | normal |
| chr09      | 1100001 | 1200000 | 0.047                         | 1.183       | normal |
| chr09      | 1200001 | 1300000 | 0.029                         | 1.048       | normal |
| chr09      | 1300001 | 1400000 | 0.050                         | 1.010       | normal |
| chr09      | 1400001 | 1500000 | 0.083                         | 0.850       | normal |
| chr09      | 1500001 | 1600000 | 0.074                         | 0.937       | normal |
| chr09      | 1600001 | 1700000 | 0.030                         | 0.843       | normal |
| chr09      | 1700001 | 1800000 | 0.026                         | 0.937       | normal |
| chr09      | 1800001 | 1900000 | 0.119                         | 0.979       | normal |
| chr09      | 1900001 | 2000000 | 0.114                         | 0.769       | normal |
| chr09      | 2000001 | 2100000 | 0.106                         | 1.048       | normal |
| chr09      | 2100001 | 2200000 | 0.110                         | 0.771       | normal |
| chr09      | 2200001 | 2300000 | 0.035                         | 0.928       | normal |
| chr09      | 2300001 | 2400000 | 0.098                         | 1.218       | normal |
| chr09      | 2400001 | 2500000 | 0.077                         | 1.135       | normal |
| chr09      | 2500001 | 2600000 | 0.165                         | 1.370       | normal |
| chr09      | 2600001 | 2700000 | 0.100                         | 0.902       | normal |
| chr09      | 2700001 | 2800000 | 0.135                         | 0.957       | normal |
| chr09      | 2800001 | 2900000 | 0.108                         | 1.059       | normal |
| chr09      | 2900001 | 3000000 | 0.127                         | 0.889       | normal |
| chr09      | 3000001 | 3100000 | 0.117                         | 1.023       | normal |
| chr09      | 3100001 | 3200000 | 0.208                         | 2.879       | sig    |
| chr09      | 3200001 | 3300000 | 0.254                         | 1.232       | normal |
| chr09      | 3300001 | 3400000 | 0.085                         | 0.993       | normal |
| chr09      | 3400001 | 3500000 | 0.084                         | 0.954       | normal |
| chr09      | 3500001 | 3600000 | 0.039                         | 0.983       | normal |
| chr09      | 3600001 | 3700000 | 0.017                         | 0.820       | normal |
| chr09      | 3700001 | 3800000 | 0.027                         | 0.961       | normal |
| chr09      | 3800001 | 3900000 | 0.052                         | 0.927       | normal |

|       |         |         |       |       |        |
|-------|---------|---------|-------|-------|--------|
| chr09 | 3900001 | 4000000 | 0.025 | 0.897 | normal |
| chr09 | 4000001 | 4100000 | 0.031 | 0.853 | normal |
| chr09 | 4100001 | 4200000 | 0.019 | 0.979 | normal |
| chr09 | 4200001 | 4300000 | 0.014 | 0.983 | normal |
| chr09 | 4300001 | 4400000 | 0.011 | 1.026 | normal |
| chr09 | 4400001 | 4500000 | 0.019 | 1.072 | normal |
| chr09 | 4500001 | 4600000 | 0.065 | 0.742 | normal |
| chr09 | 4600001 | 4700000 | 0.076 | 0.778 | normal |
| chr09 | 4700001 | 4800000 | 0.042 | 0.867 | normal |
| chr09 | 4800001 | 4900000 | 0.068 | 0.836 | normal |
| chr09 | 4900001 | 5000000 | 0.044 | 1.252 | normal |
| chr09 | 5000001 | 5100000 | 0.101 | 1.039 | normal |
| chr09 | 5100001 | 5200000 | 0.153 | 0.613 | normal |
| chr09 | 5200001 | 5300000 | 0.063 | 0.754 | normal |
| chr09 | 5300001 | 5400000 | 0.119 | 1.023 | normal |
| chr09 | 5400001 | 5500000 | 0.099 | 1.103 | normal |
| chr09 | 5500001 | 5600000 | 0.076 | 0.886 | normal |
| chr09 | 5600001 | 5700000 | 0.146 | 1.105 | normal |
| chr09 | 5700001 | 5800000 | 0.100 | 0.556 | normal |
| chr09 | 5800001 | 5900000 | 0.041 | 1.215 | normal |
| chr09 | 5900001 | 6000000 | 0.056 | 0.941 | normal |
| chr09 | 6000001 | 6100000 | 0.018 | 1.043 | normal |
| chr09 | 6100001 | 6200000 | 0.065 | 1.048 | normal |
| chr09 | 6200001 | 6300000 | 0.108 | 1.481 | normal |
| chr09 | 6300001 | 6400000 | 0.098 | 1.014 | normal |
| chr09 | 6400001 | 6500000 | 0.117 | 0.748 | normal |
| chr09 | 6500001 | 6600000 | 0.093 | 0.853 | normal |
| chr09 | 6600001 | 6700000 | 0.136 | 0.750 | normal |
| chr09 | 6700001 | 6800000 | 0.095 | 0.757 | normal |
| chr09 | 6800001 | 6900000 | 0.060 | 0.991 | normal |
| chr09 | 6900001 | 7000000 | 0.156 | 0.569 | normal |
| chr09 | 7000001 | 7100000 | 0.099 | 0.785 | normal |
| chr09 | 7100001 | 7200000 | 0.116 | 0.989 | normal |
| chr09 | 7200001 | 7300000 | 0.023 | 1.011 | normal |
| chr09 | 7300001 | 7400000 | 0.097 | 1.035 | normal |
| chr09 | 7400001 | 7500000 | 0.079 | 0.960 | normal |
| chr09 | 7500001 | 7600000 | 0.042 | 1.219 | normal |
| chr09 | 7600001 | 7700000 | 0.050 | 0.998 | normal |
| chr09 | 7700001 | 7800000 | 0.099 | 0.924 | normal |
| chr09 | 7800001 | 7900000 | 0.206 | 0.832 | normal |
| chr09 | 7900001 | 8000000 | 0.073 | 1.118 | normal |
| chr09 | 8000001 | 8100000 | 0.059 | 0.941 | normal |
| chr09 | 8100001 | 8200000 | 0.065 | 1.075 | normal |
| chr09 | 8200001 | 8300000 | 0.068 | 1.071 | normal |

|       |          |          |       |       |        |
|-------|----------|----------|-------|-------|--------|
| chr09 | 8300001  | 8400000  | 0.058 | 1.126 | normal |
| chr09 | 8400001  | 8500000  | 0.045 | 0.990 | normal |
| chr09 | 8500001  | 8600000  | 0.070 | 1.184 | normal |
| chr09 | 8600001  | 8700000  | 0.054 | 1.093 | normal |
| chr09 | 8700001  | 8800000  | 0.058 | 1.014 | normal |
| chr09 | 8800001  | 8900000  | 0.064 | 0.983 | normal |
| chr09 | 8900001  | 9000000  | 0.108 | 0.937 | normal |
| chr09 | 9000001  | 9100000  | 0.078 | 0.971 | normal |
| chr09 | 9100001  | 9200000  | 0.049 | 1.045 | normal |
| chr09 | 9200001  | 9300000  | 0.060 | 0.912 | normal |
| chr09 | 9300001  | 9400000  | 0.039 | 1.011 | normal |
| chr09 | 9400001  | 9500000  | 0.028 | 1.265 | normal |
| chr09 | 9500001  | 9600000  | 0.141 | 1.449 | normal |
| chr09 | 9600001  | 9700000  | 0.080 | 0.945 | normal |
| chr09 | 9700001  | 9800000  | 0.067 | 1.003 | normal |
| chr09 | 9800001  | 9900000  | 0.118 | 0.700 | normal |
| chr09 | 9900001  | 10000000 | 0.082 | 0.584 | normal |
| chr09 | 10000001 | 10100000 | 0.050 | 0.966 | normal |
| chr09 | 10100001 | 10200000 | 0.109 | 1.291 | normal |
| chr09 | 10200001 | 10300000 | 0.086 | 1.789 | normal |
| chr09 | 10300001 | 10400000 | 0.092 | 1.202 | normal |
| chr09 | 10400001 | 10500000 | 0.093 | 1.141 | normal |
| chr09 | 10500001 | 10600000 | 0.042 | 1.168 | normal |
| chr09 | 10600001 | 10700000 | 0.015 | 0.731 | normal |
| chr09 | 10700001 | 10800000 | 0.052 | 0.989 | normal |
| chr09 | 10800001 | 10900000 | 0.023 | 0.891 | normal |
| chr09 | 10900001 | 11000000 | 0.106 | 0.848 | normal |
| chr09 | 11000001 | 11100000 | 0.060 | 1.004 | normal |
| chr09 | 11100001 | 11200000 | 0.079 | 1.055 | normal |
| chr09 | 11200001 | 11300000 | 0.153 | 0.979 | normal |
| chr09 | 11300001 | 11400000 | 0.061 | 0.865 | normal |
| chr09 | 11400001 | 11500000 | 0.081 | 1.046 | normal |
| chr09 | 11500001 | 11600000 | 0.060 | 1.055 | normal |
| chr09 | 11600001 | 11700000 | 0.059 | 0.996 | normal |
| chr09 | 11700001 | 11800000 | 0.062 | 1.109 | normal |
| chr09 | 11800001 | 11900000 | 0.048 | 1.040 | normal |
| chr09 | 11900001 | 12000000 | 0.043 | 0.943 | normal |
| chr09 | 12000001 | 12100000 | 0.030 | 0.963 | normal |
| chr09 | 12100001 | 12200000 | 0.033 | 1.132 | normal |
| chr09 | 12200001 | 12300000 | 0.016 | 1.021 | normal |
| chr09 | 12300001 | 12400000 | 0.035 | 1.160 | normal |
| chr09 | 12400001 | 12500000 | 0.033 | 1.134 | normal |
| chr09 | 12500001 | 12600000 | 0.044 | 1.086 | normal |
| chr09 | 12600001 | 12700000 | 0.037 | 1.081 | normal |

|       |          |          |       |       |        |
|-------|----------|----------|-------|-------|--------|
| chr09 | 12700001 | 12800000 | 0.052 | 1.021 | normal |
| chr09 | 12800001 | 12900000 | 0.070 | 1.189 | normal |
| chr09 | 12900001 | 13000000 | 0.060 | 1.264 | normal |
| chr09 | 13000001 | 13100000 | 0.071 | 1.120 | normal |
| chr09 | 13100001 | 13200000 | 0.127 | 1.001 | normal |
| chr09 | 13200001 | 13300000 | 0.062 | 1.000 | normal |
| chr09 | 13300001 | 13400000 | 0.040 | 0.981 | normal |
| chr09 | 13400001 | 13500000 | 0.059 | 0.915 | normal |
| chr09 | 13500001 | 13600000 | 0.031 | 1.065 | normal |
| chr09 | 13600001 | 13700000 | 0.026 | 0.911 | normal |
| chr09 | 13700001 | 13800000 | 0.033 | 0.960 | normal |
| chr09 | 13800001 | 13900000 | 0.055 | 0.953 | normal |
| chr09 | 13900001 | 14000000 | 0.104 | 0.966 | normal |
| chr09 | 14000001 | 14100000 | 0.064 | 1.040 | normal |
| chr09 | 14100001 | 14200000 | 0.042 | 0.942 | normal |
| chr09 | 14200001 | 14300000 | 0.044 | 1.278 | normal |
| chr09 | 14300001 | 14400000 | 0.036 | 1.017 | normal |
| chr09 | 14400001 | 14500000 | 0.076 | 0.957 | normal |
| chr09 | 14500001 | 14600000 | 0.070 | 1.168 | normal |
| chr09 | 14600001 | 14700000 | 0.127 | 0.995 | normal |
| chr09 | 14700001 | 14800000 | 0.104 | 1.102 | normal |
| chr09 | 14800001 | 14900000 | 0.122 | 2.238 | normal |
| chr09 | 14900001 | 15000000 | 0.119 | 1.112 | normal |
| chr09 | 15000001 | 15100000 | 0.088 | 1.060 | normal |
| chr09 | 15100001 | 15200000 | 0.080 | 1.081 | normal |
| chr09 | 15200001 | 15300000 | 0.046 | 0.941 | normal |
| chr09 | 15300001 | 15400000 | 0.099 | 0.935 | normal |
| chr09 | 15400001 | 15500000 | 0.075 | 0.868 | normal |
| chr09 | 15500001 | 15600000 | 0.081 | 0.758 | normal |
| chr09 | 15600001 | 15700000 | 0.085 | 0.857 | normal |
| chr09 | 15700001 | 15800000 | 0.062 | 0.829 | normal |
| chr09 | 15800001 | 15900000 | 0.100 | 1.155 | normal |
| chr09 | 15900001 | 16000000 | 0.101 | 1.169 | normal |
| chr09 | 16000001 | 16100000 | 0.098 | 1.032 | normal |
| chr09 | 16100001 | 16200000 | 0.126 | 1.063 | normal |
| chr09 | 16200001 | 16300000 | 0.148 | 1.390 | normal |
| chr09 | 16300001 | 16400000 | 0.099 | 1.389 | normal |
| chr09 | 16400001 | 16500000 | 0.050 | 1.058 | normal |
| chr09 | 16500001 | 16600000 | 0.041 | 1.067 | normal |
| chr09 | 16600001 | 16700000 | 0.057 | 1.286 | normal |
| chr09 | 16700001 | 16800000 | 0.051 | 1.158 | normal |
| chr09 | 16800001 | 16900000 | 0.047 | 1.059 | normal |
| chr09 | 16900001 | 17000000 | 0.030 | 1.069 | normal |
| chr09 | 17000001 | 17100000 | 0.077 | 1.137 | normal |

|       |          |          |       |       |        |
|-------|----------|----------|-------|-------|--------|
| chr09 | 17100001 | 17200000 | 0.060 | 1.134 | normal |
| chr09 | 17200001 | 17300000 | 0.053 | 1.172 | normal |
| chr09 | 17300001 | 17400000 | 0.100 | 1.322 | normal |
| chr09 | 17400001 | 17500000 | 0.047 | 1.505 | normal |
| chr09 | 17500001 | 17600000 | 0.082 | 0.954 | normal |
| chr09 | 17600001 | 17700000 | 0.082 | 0.943 | normal |
| chr09 | 17700001 | 17800000 | 0.095 | 0.907 | normal |
| chr09 | 17800001 | 17900000 | 0.095 | 0.679 | normal |
| chr09 | 17900001 | 18000000 | 0.066 | 0.979 | normal |
| chr09 | 18000001 | 18100000 | 0.059 | 1.005 | normal |
| chr09 | 18100001 | 18200000 | 0.056 | 1.119 | normal |
| chr09 | 18200001 | 18300000 | 0.093 | 1.166 | normal |
| chr09 | 18300001 | 18400000 | 0.069 | 1.128 | normal |
| chr09 | 18400001 | 18500000 | 0.065 | 1.185 | normal |
| chr09 | 18500001 | 18600000 | 0.116 | 1.406 | normal |
| chr09 | 18600001 | 18700000 | 0.074 | 1.118 | normal |
| chr09 | 18700001 | 18800000 | 0.052 | 1.057 | normal |
| chr09 | 18800001 | 18900000 | 0.129 | 0.746 | normal |
| chr09 | 18900001 | 19000000 | 0.065 | 1.101 | normal |
| chr09 | 19000001 | 19100000 | 0.040 | 1.054 | normal |
| chr09 | 19100001 | 19200000 | 0.088 | 0.920 | normal |
| chr09 | 19200001 | 19300000 | 0.065 | 1.248 | normal |
| chr09 | 19300001 | 19400000 | 0.052 | 1.156 | normal |
| chr09 | 19400001 | 19500000 | 0.072 | 1.063 | normal |
| chr09 | 19500001 | 19600000 | 0.096 | 0.951 | normal |
| chr09 | 19600001 | 19700000 | 0.091 | 0.820 | normal |
| chr09 | 19700001 | 19800000 | 0.075 | 0.840 | normal |
| chr09 | 19800001 | 19900000 | 0.105 | 0.714 | normal |
| chr09 | 19900001 | 20000000 | 0.147 | 0.595 | normal |
| chr09 | 20000001 | 20100000 | 0.110 | 0.704 | normal |
| chr09 | 20100001 | 20200000 | 0.073 | 0.882 | normal |
| chr09 | 20200001 | 20300000 | 0.051 | 1.195 | normal |
| chr09 | 20300001 | 20400000 | 0.045 | 1.086 | normal |
| chr09 | 20400001 | 20500000 | 0.079 | 1.168 | normal |
| chr09 | 20500001 | 20600000 | 0.127 | 1.585 | normal |
| chr09 | 20600001 | 20700000 | 0.120 | 0.898 | normal |
| chr09 | 20700001 | 20800000 | 0.098 | 0.761 | normal |
| chr09 | 20800001 | 20900000 | 0.085 | 0.990 | normal |
| chr09 | 20900001 | 21000000 | 0.087 | 0.574 | normal |
| chr09 | 21000001 | 21100000 | 0.089 | 0.834 | normal |
| chr09 | 21100001 | 21200000 | 0.067 | 1.233 | normal |
| chr09 | 21200001 | 21300000 | 0.090 | 0.827 | normal |
| chr09 | 21300001 | 21400000 | 0.069 | 0.708 | normal |
| chr09 | 21400001 | 21500000 | 0.055 | 0.993 | normal |

|       |          |          |       |       |        |
|-------|----------|----------|-------|-------|--------|
| chr09 | 21500001 | 21600000 | 0.022 | 1.086 | normal |
| chr09 | 21600001 | 21700000 | 0.068 | 0.842 | normal |
| chr09 | 21700001 | 21800000 | 0.034 | 0.756 | normal |
| chr09 | 21800001 | 21900000 | 0.202 | 1.266 | normal |
| chr09 | 21900001 | 22000000 | 0.166 | 1.585 | sig    |
| chr09 | 22000001 | 22100000 | 0.114 | 1.289 | normal |
| chr09 | 22100001 | 22200000 | 0.092 | 1.186 | normal |
| chr09 | 22200001 | 22300000 | 0.111 | 1.184 | normal |
| chr09 | 22300001 | 22400000 | 0.090 | 0.909 | normal |
| chr09 | 22400001 | 22500000 | 0.115 | 1.264 | normal |
| chr09 | 22500001 | 22600000 | 0.102 | 1.023 | normal |
| chr09 | 22600001 | 22700000 | 0.113 | 0.932 | normal |
| chr09 | 22700001 | 22800000 | 0.122 | 0.958 | normal |
| chr09 | 22800001 | 22900000 | 0.092 | 1.245 | normal |
| chr09 | 22900001 | 23000000 | 0.059 | 1.068 | normal |
| chr09 | 23000001 | 23100000 | 0.095 | 1.280 | normal |
| chr09 | 23100001 | 23200000 | 0.056 | 1.104 | normal |
| chr09 | 23200001 | 23300000 | 0.108 | 1.142 | normal |
| chr09 | 23300001 | 23400000 | 0.037 | 1.039 | normal |
| chr09 | 23400001 | 23500000 | 0.053 | 1.164 | normal |
| chr09 | 23500001 | 23600000 | 0.098 | 1.057 | normal |
| chr09 | 23600001 | 23700000 | 0.179 | 0.576 | normal |
| chr09 | 23700001 | 23800000 | 0.089 | 1.129 | normal |
| chr09 | 23800001 | 23900000 | 0.074 | 0.989 | normal |
| chr09 | 23900001 | 24000000 | 0.096 | 0.950 | normal |
| chr09 | 24000001 | 24100000 | 0.122 | 0.923 | normal |
| chr09 | 24100001 | 24200000 | 0.071 | 1.099 | normal |
| chr09 | 24200001 | 24300000 | 0.111 | 1.301 | normal |
| chr09 | 24300001 | 24400000 | 0.064 | 1.398 | normal |
| chr09 | 24400001 | 24500000 | 0.089 | 0.997 | normal |
| chr09 | 24500001 | 24600000 | 0.078 | 1.158 | normal |
| chr09 | 24600001 | 24700000 | 0.067 | 1.108 | normal |
| chr09 | 24700001 | 24800000 | 0.078 | 1.080 | normal |
| chr09 | 24800001 | 24900000 | 0.062 | 1.046 | normal |
| chr09 | 24900001 | 25000000 | 0.037 | 1.040 | normal |
| chr09 | 25000001 | 25100000 | 0.031 | 1.234 | normal |
| chr09 | 25100001 | 25200000 | 0.038 | 1.065 | normal |
| chr09 | 25200001 | 25300000 | 0.052 | 0.998 | normal |
| chr09 | 25300001 | 25400000 | 0.119 | 0.925 | normal |
| chr09 | 25400001 | 25500000 | 0.087 | 0.935 | normal |
| chr09 | 25500001 | 25600000 | 0.122 | 0.767 | normal |
| chr09 | 25600001 | 25700000 | 0.129 | 0.893 | normal |
| chr09 | 25700001 | 25800000 | 0.091 | 1.075 | normal |
| chr09 | 25800001 | 25900000 | 0.074 | 0.929 | normal |

|       |          |          |       |       |        |
|-------|----------|----------|-------|-------|--------|
| chr09 | 25900001 | 26000000 | 0.061 | 1.221 | normal |
| chr09 | 26000001 | 26100000 | 0.091 | 1.051 | normal |
| chr09 | 26100001 | 26200000 | 0.057 | 1.113 | normal |
| chr09 | 26200001 | 26300000 | 0.118 | 1.169 | normal |
| chr09 | 26300001 | 26400000 | 0.138 | 1.097 | normal |
| chr09 | 26400001 | 26500000 | 0.130 | 1.254 | normal |
| chr09 | 26500001 | 26600000 | 0.091 | 1.273 | normal |
| chr09 | 26600001 | 26700000 | 0.073 | 1.026 | normal |
| chr09 | 26700001 | 26800000 | 0.048 | 1.032 | normal |
| chr09 | 26800001 | 26900000 | 0.127 | 1.118 | normal |
| chr09 | 26900001 | 27000000 | 0.115 | 1.004 | normal |
| chr09 | 27000001 | 27100000 | 0.067 | 1.179 | normal |
| chr09 | 27100001 | 27200000 | 0.081 | 0.885 | normal |
| chr09 | 27200001 | 27300000 | 0.155 | 1.379 | normal |
| chr09 | 27300001 | 27400000 | 0.077 | 1.316 | normal |
| chr09 | 27400001 | 27500000 | 0.045 | 0.889 | normal |
| chr09 | 27500001 | 27600000 | 0.084 | 1.199 | normal |
| chr09 | 27600001 | 27700000 | 0.080 | 0.899 | normal |
| chr09 | 27700001 | 27800000 | 0.088 | 0.757 | normal |
| chr09 | 27800001 | 27900000 | 0.063 | 0.895 | normal |
| chr09 | 27900001 | 28000000 | 0.105 | 0.893 | normal |
| chr09 | 28000001 | 28100000 | 0.140 | 1.620 | normal |
| chr09 | 28100001 | 28200000 | 0.053 | 1.034 | normal |
| chr09 | 28200001 | 28300000 | 0.076 | 0.979 | normal |
| chr09 | 28300001 | 28400000 | 0.086 | 1.383 | normal |
| chr09 | 28400001 | 28500000 | 0.064 | 1.076 | normal |
| chr09 | 28500001 | 28600000 | 0.093 | 0.935 | normal |
| chr09 | 28600001 | 28700000 | 0.098 | 0.938 | normal |
| chr09 | 28700001 | 28800000 | 0.084 | 1.111 | normal |
| chr09 | 28800001 | 28900000 | 0.110 | 0.799 | normal |
| chr09 | 28900001 | 29000000 | 0.066 | 0.942 | normal |
| chr09 | 29000001 | 29100000 | 0.073 | 1.013 | normal |
| chr09 | 29100001 | 29200000 | 0.050 | 1.062 | normal |
| chr09 | 29200001 | 29300000 | 0.097 | 1.479 | normal |
| chr09 | 29300001 | 29400000 | 0.072 | 1.026 | normal |
| chr09 | 29400001 | 29500000 | 0.056 | 0.968 | normal |
| chr09 | 29500001 | 29600000 | 0.128 | 0.733 | normal |
| chr09 | 29600001 | 29700000 | 0.136 | 0.704 | normal |
| chr09 | 29700001 | 29800000 | 0.057 | 0.922 | normal |
| chr09 | 29800001 | 29900000 | 0.103 | 0.953 | normal |
| chr09 | 29900001 | 30000000 | 0.093 | 0.836 | normal |
| chr09 | 30000001 | 30100000 | 0.084 | 0.846 | normal |
| chr09 | 30100001 | 30200000 | 0.077 | 0.954 | normal |
| chr09 | 30200001 | 30300000 | 0.135 | 0.896 | normal |

|       |          |          |       |       |        |
|-------|----------|----------|-------|-------|--------|
| chr09 | 30300001 | 30400000 | 0.104 | 1.208 | normal |
| chr09 | 30400001 | 30500000 | 0.106 | 0.865 | normal |
| chr09 | 30500001 | 30600000 | 0.103 | 0.996 | normal |
| chr09 | 30600001 | 30700000 | 0.085 | 0.795 | normal |
| chr09 | 30700001 | 30800000 | 0.162 | 0.851 | normal |
| chr09 | 30800001 | 30900000 | 0.127 | 0.808 | normal |
| chr09 | 30900001 | 31000000 | 0.058 | 1.762 | normal |
| chr09 | 31000001 | 31100000 | 0.048 | 0.835 | normal |
| chr09 | 31100001 | 31200000 | 0.110 | 0.897 | normal |
| chr09 | 31200001 | 31300000 | 0.062 | 1.120 | normal |
| chr09 | 31300001 | 31400000 | 0.094 | 0.859 | normal |
| chr09 | 31400001 | 31500000 | 0.094 | 1.087 | normal |
| chr09 | 31500001 | 31600000 | 0.122 | 1.440 | normal |
| chr09 | 31600001 | 31700000 | 0.116 | 1.223 | normal |
| chr09 | 31700001 | 31800000 | 0.089 | 1.027 | normal |
| chr09 | 31800001 | 31900000 | 0.061 | 0.971 | normal |
| chr09 | 31900001 | 32000000 | 0.103 | 0.970 | normal |
| chr09 | 32000001 | 32100000 | 0.138 | 0.866 | normal |
| chr09 | 32100001 | 32200000 | 0.096 | 1.035 | normal |
| chr09 | 32200001 | 32300000 | 0.087 | 0.962 | normal |
| chr09 | 32300001 | 32400000 | 0.105 | 0.908 | normal |
| chr09 | 32400001 | 32500000 | 0.074 | 0.976 | normal |
| chr09 | 32500001 | 32600000 | 0.045 | 1.162 | normal |
| chr09 | 32600001 | 32700000 | 0.122 | 1.399 | normal |
| chr09 | 32700001 | 32800000 | 0.081 | 1.176 | normal |
| chr09 | 32800001 | 32900000 | 0.089 | 0.828 | normal |
| chr09 | 32900001 | 33000000 | 0.032 | 0.967 | normal |
| chr09 | 33000001 | 33100000 | 0.051 | 0.743 | normal |
| chr09 | 33100001 | 33200000 | 0.092 | 0.715 | normal |
| chr09 | 33200001 | 33300000 | 0.076 | 0.835 | normal |
| chr09 | 33300001 | 33400000 | 0.057 | 0.986 | normal |
| chr09 | 33400001 | 33500000 | 0.072 | 1.147 | normal |
| chr09 | 33500001 | 33600000 | 0.113 | 0.744 | normal |
| chr09 | 33600001 | 33700000 | 0.023 | 1.059 | normal |
| chr09 | 33700001 | 33800000 | 0.090 | 1.744 | normal |
| chr09 | 33800001 | 33900000 | 0.118 | 2.109 | normal |
| chr09 | 33900001 | 34000000 | 0.053 | 1.164 | normal |
| chr09 | 34000001 | 34100000 | 0.074 | 1.283 | normal |
| chr09 | 34100001 | 34200000 | 0.104 | 1.461 | normal |
| chr09 | 34200001 | 34300000 | 0.061 | 0.871 | normal |
| chr09 | 34300001 | 34400000 | 0.037 | 1.135 | normal |
| chr09 | 34400001 | 34500000 | 0.060 | 0.867 | normal |
| chr09 | 34500001 | 34600000 | 0.038 | 0.733 | normal |
| chr09 | 34600001 | 34700000 | 0.051 | 0.971 | normal |



|       |          |          |       |       |        |
|-------|----------|----------|-------|-------|--------|
| chr09 | 34700001 | 34800000 | 0.018 | 1.094 | normal |
| chr09 | 34800001 | 34900000 | 0.048 | 0.975 | normal |
| chr09 | 34900001 | 35000000 | 0.053 | 0.952 | normal |
| chr09 | 35000001 | 35100000 | 0.016 | 0.953 | normal |
| chr09 | 35100001 | 35200000 | 0.038 | 0.982 | normal |
| chr09 | 35200001 | 35300000 | 0.076 | 1.258 | normal |
| chr09 | 35300001 | 35400000 | 0.048 | 0.884 | normal |
| chr09 | 35400001 | 35500000 | 0.079 | 0.849 | normal |
| chr09 | 35500001 | 35600000 | 0.103 | 0.644 | normal |
| chr09 | 35600001 | 35700000 | 0.047 | 1.100 | normal |
| chr09 | 35700001 | 35800000 | 0.027 | 0.932 | normal |
| chr09 | 35800001 | 35900000 | 0.038 | 1.066 | normal |
| chr09 | 35900001 | 36000000 | 0.035 | 1.084 | normal |
| chr09 | 36000001 | 36100000 | 0.036 | 1.015 | normal |
| chr09 | 36100001 | 36200000 | 0.053 | 0.844 | normal |
| chr09 | 36200001 | 36300000 | 0.061 | 0.973 | normal |
| chr09 | 36300001 | 36400000 | 0.076 | 0.854 | normal |
| chr09 | 36400001 | 36500000 | 0.041 | 1.129 | normal |
| chr09 | 36500001 | 36600000 | 0.041 | 1.040 | normal |
| chr09 | 36600001 | 36700000 | 0.045 | 1.010 | normal |
| chr09 | 36700001 | 36800000 | 0.036 | 0.870 | normal |
| chr09 | 36800001 | 36900000 | 0.028 | 0.890 | normal |
| chr09 | 36900001 | 37000000 | 0.056 | 0.973 | normal |
| chr09 | 37000001 | 37100000 | 0.114 | 0.789 | normal |
| chr09 | 37100001 | 37200000 | 0.145 | 0.719 | normal |
| chr09 | 37200001 | 37300000 | 0.037 | 0.846 | normal |
| chr09 | 37300001 | 37400000 | 0.064 | 0.909 | normal |
| chr09 | 37400001 | 37500000 | 0.063 | 1.023 | normal |
| chr09 | 37500001 | 37600000 | 0.062 | 0.854 | normal |
| chr09 | 37600001 | 37700000 | 0.020 | 0.905 | normal |
| chr09 | 37700001 | 37800000 | 0.076 | 0.951 | normal |
| chr09 | 37800001 | 37900000 | 0.053 | 0.754 | normal |
| chr09 | 37900001 | 38000000 | 0.026 | 0.974 | normal |
| chr09 | 38000001 | 38100000 | 0.079 | 0.780 | normal |
| chr09 | 38100001 | 38200000 | 0.029 | 1.232 | normal |
| chr09 | 38200001 | 38300000 | 0.033 | 0.949 | normal |
| chr09 | 38300001 | 38400000 | 0.072 | 0.868 | normal |
| chr09 | 38400001 | 38500000 | 0.016 | 0.985 | normal |
| chr09 | 38500001 | 38600000 | 0.103 | 0.493 | normal |
| chr09 | 38600001 | 38700000 | 0.051 | 0.912 | normal |
| chr09 | 38700001 | 38800000 | 0.065 | 0.859 | normal |
| chr09 | 38800001 | 38900000 | 0.038 | 0.938 | normal |
| chr09 | 38900001 | 39000000 | 0.096 | 1.137 | normal |
| chr09 | 39000001 | 39100000 | 0.059 | 6.703 | normal |

|       |          |          |       |       |        |
|-------|----------|----------|-------|-------|--------|
| chr09 | 39100001 | 39200000 | 0.077 | 0.886 | normal |
| chr09 | 39200001 | 39300000 | 0.061 | 0.871 | normal |
| chr09 | 39300001 | 39400000 | 0.044 | 0.986 | normal |
| chr09 | 39400001 | 39500000 | 0.037 | 1.217 | normal |
| chr09 | 39500001 | 39600000 | 0.051 | 1.448 | normal |
| chr09 | 39600001 | 39700000 | 0.106 | 1.691 | normal |
| chr09 | 39700001 | 39800000 | 0.074 | 1.728 | normal |
| chr09 | 39800001 | 39900000 | 0.052 | 1.503 | normal |
| chr09 | 39900001 | 40000000 | 0.068 | 0.777 | normal |
| chr09 | 40000001 | 40100000 | 0.048 | 1.287 | normal |
| chr09 | 40100001 | 40200000 | 0.054 | 1.193 | normal |
| chr09 | 40200001 | 40300000 | 0.066 | 1.127 | normal |
| chr09 | 40300001 | 40400000 | 0.070 | 1.010 | normal |
| chr09 | 40400001 | 40500000 | 0.056 | 1.077 | normal |
| chr09 | 40500001 | 40600000 | 0.073 | 1.001 | normal |
| chr09 | 40600001 | 40700000 | 0.065 | 0.970 | normal |
| chr09 | 40700001 | 40800000 | 0.054 | 1.037 | normal |
| chr09 | 40800001 | 40900000 | 0.057 | 0.946 | normal |
| chr09 | 40900001 | 41000000 | 0.091 | 0.795 | normal |
| chr09 | 41000001 | 41100000 | 0.073 | 1.368 | normal |
| chr09 | 41100001 | 41200000 | 0.081 | 1.369 | normal |
| chr09 | 41200001 | 41300000 | 0.116 | 1.459 | normal |
| chr09 | 41300001 | 41400000 | 0.102 | 0.912 | normal |
| chr09 | 41400001 | 41500000 | 0.097 | 1.004 | normal |
| chr09 | 41500001 | 41600000 | 0.095 | 0.977 | normal |
| chr09 | 41600001 | 41700000 | 0.030 | 1.016 | normal |
| chr09 | 41700001 | 41800000 | 0.085 | 0.848 | normal |
| chr09 | 41800001 | 41900000 | 0.133 | 1.211 | normal |
| chr09 | 41900001 | 42000000 | 0.106 | 1.076 | normal |
| chr09 | 42000001 | 42100000 | 0.077 | 1.130 | normal |
| chr09 | 42100001 | 42200000 | 0.197 | 0.921 | normal |
| chr09 | 42200001 | 42300000 | 0.037 | 0.984 | normal |
| chr09 | 42300001 | 42400000 | 0.057 | 0.928 | normal |
| chr09 | 42400001 | 42500000 | 0.046 | 1.051 | normal |
| chr09 | 42500001 | 42600000 | 0.052 | 0.994 | normal |
| chr09 | 42600001 | 42700000 | 0.079 | 0.765 | normal |
| chr09 | 42700001 | 42800000 | 0.063 | 0.990 | normal |
| chr09 | 42800001 | 42900000 | 0.027 | 1.047 | normal |
| chr09 | 42900001 | 43000000 | 0.046 | 1.068 | normal |
| chr09 | 43000001 | 43100000 | 0.032 | 1.010 | normal |
| chr09 | 43100001 | 43200000 | 0.041 | 0.809 | normal |
| chr09 | 43200001 | 43300000 | 0.080 | 0.768 | normal |
| chr09 | 43300001 | 43400000 | 0.055 | 0.852 | normal |
| chr09 | 43400001 | 43500000 | 0.035 | 0.931 | normal |

|       |          |          |       |       |        |
|-------|----------|----------|-------|-------|--------|
| chr09 | 43500001 | 43600000 | 0.041 | 0.997 | normal |
| chr09 | 43600001 | 43700000 | 0.024 | 0.946 | normal |
| chr09 | 43700001 | 43800000 | 0.078 | 0.793 | normal |
| chr09 | 43800001 | 43900000 | 0.086 | 0.825 | normal |
| chr09 | 43900001 | 44000000 | 0.054 | 0.932 | normal |
| chr09 | 44000001 | 44100000 | 0.042 | 0.888 | normal |
| chr09 | 44100001 | 44200000 | 0.099 | 1.078 | normal |
| chr09 | 44200001 | 44300000 | 0.054 | 0.966 | normal |
| chr09 | 44300001 | 44400000 | 0.024 | 0.806 | normal |
| chr09 | 44400001 | 44500000 | 0.035 | 0.878 | normal |
| chr09 | 44500001 | 44600000 | 0.164 | 0.424 | normal |
| chr09 | 44600001 | 44700000 | 0.148 | 0.668 | normal |
| chr09 | 44700001 | 44800000 | 0.038 | 0.991 | normal |
| chr09 | 44800001 | 44900000 | 0.034 | 0.983 | normal |
| chr09 | 44900001 | 45000000 | 0.048 | 1.029 | normal |
| chr09 | 45000001 | 45100000 | 0.050 | 1.000 | normal |
| chr09 | 45100001 | 45200000 | 0.054 | 1.037 | normal |
| chr09 | 45200001 | 45300000 | 0.052 | 1.109 | normal |
| chr09 | 45300001 | 45400000 | 0.057 | 1.110 | normal |
| chr09 | 45400001 | 45500000 | 0.059 | 1.122 | normal |
| chr09 | 45500001 | 45600000 | 0.047 | 1.067 | normal |
| chr09 | 45600001 | 45700000 | 0.053 | 1.011 | normal |
| chr09 | 45700001 | 45800000 | 0.039 | 0.985 | normal |
| chr09 | 45800001 | 45900000 | 0.046 | 0.951 | normal |
| chr09 | 45900001 | 46000000 | 0.057 | 0.976 | normal |
| chr09 | 46000001 | 46100000 | 0.055 | 1.088 | normal |
| chr09 | 46100001 | 46200000 | 0.042 | 0.838 | normal |
| chr09 | 46200001 | 46300000 | 0.025 | 0.972 | normal |
| chr09 | 46300001 | 46400000 | 0.040 | 0.975 | normal |
| chr09 | 46400001 | 46500000 | 0.037 | 1.062 | normal |
| chr09 | 46500001 | 46600000 | 0.060 | 1.125 | normal |
| chr09 | 46600001 | 46700000 | 0.060 | 1.137 | normal |
| chr09 | 46700001 | 46800000 | 0.132 | 0.692 | normal |
| chr09 | 46800001 | 46900000 | 0.088 | 0.665 | normal |
| chr09 | 46900001 | 47000000 | 0.028 | 1.218 | normal |
| chr09 | 47000001 | 47100000 | 0.041 | 1.386 | normal |
| chr09 | 47100001 | 47200000 | 0.028 | 1.805 | normal |
| chr09 | 47200001 | 47300000 | 0.041 | 1.639 | normal |
| chr09 | 47300001 | 47400000 | 0.038 | 1.286 | normal |
| chr09 | 47400001 | 47500000 | 0.037 | 0.867 | normal |
| chr09 | 47500001 | 47600000 | 0.067 | 0.788 | normal |
| chr09 | 47600001 | 47700000 | 0.092 | 0.945 | normal |
| chr09 | 47700001 | 47800000 | 0.083 | 0.959 | normal |
| chr09 | 47800001 | 47900000 | 0.120 | 0.870 | normal |

|       |          |          |        |       |        |
|-------|----------|----------|--------|-------|--------|
| chr09 | 47900001 | 48000000 | 0.093  | 1.131 | normal |
| chr09 | 48000001 | 48100000 | 0.080  | 0.785 | normal |
| chr09 | 48100001 | 48200000 | 0.044  | 0.626 | normal |
| chr09 | 48200001 | 48300000 | 0.040  | 0.931 | normal |
| chr09 | 48300001 | 48400000 | 0.098  | 0.684 | normal |
| chr09 | 48400001 | 48500000 | 0.093  | 0.632 | normal |
| chr09 | 48500001 | 48600000 | 0.026  | 0.995 | normal |
| chr09 | 48600001 | 48700000 | 0.069  | 0.799 | normal |
| chr09 | 48700001 | 48800000 | 0.064  | 0.773 | normal |
| chr09 | 48800001 | 48900000 | 0.053  | 0.786 | normal |
| chr09 | 48900001 | 49000000 | 0.077  | 0.952 | normal |
| chr09 | 49000001 | 49100000 | 0.042  | 1.122 | normal |
| chr09 | 49100001 | 49200000 | 0.013  | 1.231 | normal |
| chr09 | 49200001 | 49300000 | 0.013  | 1.052 | normal |
| chr09 | 49300001 | 49400000 | 0.024  | 0.983 | normal |
| chr09 | 49400001 | 49500000 | 0.038  | 0.814 | normal |
| chr09 | 49500001 | 49600000 | 0.070  | 0.951 | normal |
| chr09 | 49600001 | 49700000 | 0.054  | 0.990 | normal |
| chr09 | 49700001 | 49800000 | 0.114  | 0.510 | normal |
| chr09 | 49800001 | 49900000 | 0.043  | 0.851 | normal |
| chr09 | 49900001 | 50000000 | 0.058  | 0.827 | normal |
| chr09 | 50000001 | 50100000 | 0.042  | 0.969 | normal |
| chr09 | 50100001 | 50200000 | 0.042  | 0.940 | normal |
| chr09 | 50200001 | 50300000 | 0.044  | 0.934 | normal |
| chr09 | 50300001 | 50400000 | 0.047  | 1.164 | normal |
| chr09 | 50400001 | 50500000 | 0.044  | 1.151 | normal |
| chr09 | 50500001 | 50600000 | 0.048  | 0.945 | normal |
| chr09 | 50600001 | 50700000 | 0.076  | 0.905 | normal |
| chr09 | 50700001 | 50800000 | 0.074  | 1.283 | normal |
| chr09 | 50800001 | 50900000 | -0.012 | 1.185 | normal |
| chr09 | 50900001 | 51000000 | 0.013  | 1.053 | normal |
| chr09 | 51000001 | 51100000 | 0.090  | 1.053 | normal |
| chr09 | 51100001 | 51200000 | 0.072  | 1.384 | normal |
| chr09 | 51200001 | 51300000 | 0.056  | 1.168 | normal |
| chr09 | 51300001 | 51400000 | 0.034  | 1.427 | normal |
| chr09 | 51400001 | 51500000 | 0.070  | 1.021 | normal |
| chr09 | 51500001 | 51600000 | 0.056  | 1.007 | normal |
| chr09 | 51600001 | 51700000 | 0.065  | 0.857 | normal |
| chr09 | 51700001 | 51800000 | 0.049  | 1.060 | normal |
| chr09 | 51800001 | 51900000 | 0.035  | 1.078 | normal |
| chr09 | 51900001 | 52000000 | 0.026  | 1.051 | normal |
| chr09 | 52000001 | 52100000 | 0.034  | 1.007 | normal |
| chr09 | 52100001 | 52200000 | 0.102  | 1.339 | normal |
| chr09 | 52200001 | 52300000 | 0.046  | 1.025 | normal |

|       |          |          |       |       |        |
|-------|----------|----------|-------|-------|--------|
| chr09 | 52300001 | 52400000 | 0.066 | 0.956 | normal |
| chr09 | 52400001 | 52500000 | 0.098 | 0.695 | normal |
| chr09 | 52500001 | 52600000 | 0.110 | 1.003 | normal |
| chr09 | 52600001 | 52700000 | 0.033 | 1.000 | normal |
| chr09 | 52700001 | 52800000 | 0.083 | 1.266 | normal |
| chr09 | 52800001 | 52900000 | 0.067 | 1.066 | normal |
| chr09 | 52900001 | 53000000 | 0.062 | 1.010 | normal |
| chr09 | 53000001 | 53100000 | 0.113 | 1.068 | normal |
| chr09 | 53100001 | 53200000 | 0.093 | 1.130 | normal |
| chr09 | 53200001 | 53300000 | 0.061 | 0.802 | normal |
| chr09 | 53300001 | 53400000 | 0.025 | 0.973 | normal |
| chr09 | 53400001 | 53500000 | 0.049 | 0.845 | normal |
| chr09 | 53500001 | 53600000 | 0.152 | 1.439 | normal |
| chr09 | 53600001 | 53700000 | 0.076 | 0.809 | normal |
| chr09 | 53700001 | 53800000 | 0.107 | 0.589 | normal |
| chr09 | 53800001 | 53900000 | 0.115 | 0.488 | normal |
| chr09 | 53900001 | 54000000 | 0.093 | 0.579 | normal |
| chr09 | 54000001 | 54100000 | 0.051 | 0.836 | normal |
| chr09 | 54100001 | 54200000 | 0.043 | 0.780 | normal |
| chr09 | 54200001 | 54300000 | 0.093 | 0.548 | normal |
| chr09 | 54300001 | 54400000 | 0.096 | 0.635 | normal |
| chr09 | 54400001 | 54500000 | 0.064 | 1.005 | normal |
| chr09 | 54500001 | 54600000 | 0.070 | 2.320 | normal |
| chr09 | 54600001 | 54700000 | 0.066 | 0.911 | normal |
| chr09 | 54700001 | 54800000 | 0.034 | 1.033 | normal |
| chr09 | 54800001 | 54900000 | 0.183 | 1.403 | normal |
| chr09 | 54900001 | 55000000 | 0.218 | 1.567 | sig    |
| chr09 | 55000001 | 55100000 | 0.251 | 1.779 | sig    |
| chr09 | 55100001 | 55200000 | 0.028 | 1.102 | normal |
| chr09 | 55200001 | 55300000 | 0.067 | 1.047 | normal |
| chr09 | 55300001 | 55400000 | 0.046 | 1.013 | normal |
| chr09 | 55400001 | 55500000 | 0.114 | 1.066 | normal |
| chr09 | 55500001 | 55600000 | 0.032 | 1.038 | normal |
| chr09 | 55600001 | 55700000 | 0.027 | 0.972 | normal |
| chr09 | 55700001 | 55800000 | 0.114 | 0.617 | normal |
| chr10 | 1        | 100000   | 0.075 | 0.977 | normal |
| chr10 | 100001   | 200000   | 0.055 | 1.116 | normal |
| chr10 | 200001   | 300000   | 0.042 | 1.071 | normal |
| chr10 | 300001   | 400000   | 0.051 | 0.974 | normal |
| chr10 | 400001   | 500000   | 0.061 | 1.207 | normal |
| chr10 | 500001   | 600000   | 0.053 | 0.995 | normal |
| chr10 | 600001   | 700000   | 0.040 | 0.929 | normal |
| chr10 | 700001   | 800000   | 0.050 | 1.192 | normal |
| chr10 | 800001   | 900000   | 0.069 | 0.886 | normal |

|       |         |         |       |       |        |
|-------|---------|---------|-------|-------|--------|
| chr10 | 900001  | 1000000 | 0.026 | 1.047 | normal |
| chr10 | 1000001 | 1100000 | 0.048 | 0.972 | normal |
| chr10 | 1100001 | 1200000 | 0.074 | 0.874 | normal |
| chr10 | 1200001 | 1300000 | 0.065 | 1.107 | normal |
| chr10 | 1300001 | 1400000 | 0.085 | 1.282 | normal |
| chr10 | 1400001 | 1500000 | 0.051 | 0.990 | normal |
| chr10 | 1500001 | 1600000 | 0.083 | 1.130 | normal |
| chr10 | 1600001 | 1700000 | 0.071 | 1.003 | normal |
| chr10 | 1700001 | 1800000 | 0.059 | 0.985 | normal |
| chr10 | 1800001 | 1900000 | 0.027 | 1.019 | normal |
| chr10 | 1900001 | 2000000 | 0.016 | 0.912 | normal |
| chr10 | 2000001 | 2100000 | 0.011 | 0.963 | normal |
| chr10 | 2100001 | 2200000 | 0.061 | 1.177 | normal |
| chr10 | 2200001 | 2300000 | 0.157 | 0.954 | normal |
| chr10 | 2300001 | 2400000 | 0.065 | 1.022 | normal |
| chr10 | 2400001 | 2500000 | 0.057 | 0.881 | normal |
| chr10 | 2500001 | 2600000 | 0.110 | 0.935 | normal |
| chr10 | 2600001 | 2700000 | 0.050 | 1.099 | normal |
| chr10 | 2700001 | 2800000 | 0.032 | 0.993 | normal |
| chr10 | 2800001 | 2900000 | 0.157 | 0.725 | normal |
| chr10 | 2900001 | 3000000 | 0.101 | 1.076 | normal |
| chr10 | 3000001 | 3100000 | 0.032 | 1.175 | normal |
| chr10 | 3100001 | 3200000 | 0.045 | 1.137 | normal |
| chr10 | 3200001 | 3300000 | 0.011 | 0.890 | normal |
| chr10 | 3300001 | 3400000 | 0.074 | 1.082 | normal |
| chr10 | 3400001 | 3500000 | 0.082 | 0.898 | normal |
| chr10 | 3500001 | 3600000 | 0.010 | 1.081 | normal |
| chr10 | 3600001 | 3700000 | 0.046 | 0.980 | normal |
| chr10 | 3700001 | 3800000 | 0.039 | 0.899 | normal |
| chr10 | 3800001 | 3900000 | 0.069 | 1.506 | normal |
| chr10 | 3900001 | 4000000 | 0.059 | 1.997 | normal |
| chr10 | 4000001 | 4100000 | 0.047 | 1.104 | normal |
| chr10 | 4100001 | 4200000 | 0.054 | 1.319 | normal |
| chr10 | 4200001 | 4300000 | 0.054 | 1.013 | normal |
| chr10 | 4300001 | 4400000 | 0.092 | 0.685 | normal |
| chr10 | 4400001 | 4500000 | 0.081 | 0.915 | normal |
| chr10 | 4500001 | 4600000 | 0.073 | 0.936 | normal |
| chr10 | 4600001 | 4700000 | 0.104 | 1.324 | normal |
| chr10 | 4700001 | 4800000 | 0.069 | 1.475 | normal |
| chr10 | 4800001 | 4900000 | 0.025 | 1.340 | normal |
| chr10 | 4900001 | 5000000 | 0.015 | 1.200 | normal |
| chr10 | 5000001 | 5100000 | 0.016 | 1.069 | normal |
| chr10 | 5100001 | 5200000 | 0.040 | 1.186 | normal |
| chr10 | 5200001 | 5300000 | 0.052 | 1.004 | normal |

|       |         |         |       |       |        |
|-------|---------|---------|-------|-------|--------|
| chr10 | 5300001 | 5400000 | 0.069 | 1.270 | normal |
| chr10 | 5400001 | 5500000 | 0.158 | 0.951 | normal |
| chr10 | 5500001 | 5600000 | 0.101 | 1.262 | normal |
| chr10 | 5600001 | 5700000 | 0.031 | 1.311 | normal |
| chr10 | 5700001 | 5800000 | 0.023 | 1.052 | normal |
| chr10 | 5800001 | 5900000 | 0.035 | 1.021 | normal |
| chr10 | 5900001 | 6000000 | 0.043 | 0.874 | normal |
| chr10 | 6000001 | 6100000 | 0.212 | 0.794 | normal |
| chr10 | 6100001 | 6200000 | 0.120 | 0.978 | normal |
| chr10 | 6200001 | 6300000 | 0.114 | 0.802 | normal |
| chr10 | 6300001 | 6400000 | 0.166 | 0.610 | normal |
| chr10 | 6400001 | 6500000 | 0.106 | 0.872 | normal |
| chr10 | 6500001 | 6600000 | 0.065 | 1.145 | normal |
| chr10 | 6600001 | 6700000 | 0.049 | 0.980 | normal |
| chr10 | 6700001 | 6800000 | 0.042 | 0.913 | normal |
| chr10 | 6800001 | 6900000 | 0.020 | 0.939 | normal |
| chr10 | 6900001 | 7000000 | 0.015 | 0.972 | normal |
| chr10 | 7000001 | 7100000 | 0.037 | 1.074 | normal |
| chr10 | 7100001 | 7200000 | 0.038 | 1.161 | normal |
| chr10 | 7200001 | 7300000 | 0.143 | 1.397 | normal |
| chr10 | 7300001 | 7400000 | 0.099 | 1.067 | normal |
| chr10 | 7400001 | 7500000 | 0.122 | 1.377 | normal |
| chr10 | 7500001 | 7600000 | 0.110 | 1.387 | normal |
| chr10 | 7600001 | 7700000 | 0.023 | 0.976 | normal |
| chr10 | 7700001 | 7800000 | 0.083 | 0.647 | normal |
| chr10 | 7800001 | 7900000 | 0.137 | 0.596 | normal |
| chr10 | 7900001 | 8000000 | 0.124 | 0.799 | normal |
| chr10 | 8000001 | 8100000 | 0.075 | 0.888 | normal |
| chr10 | 8100001 | 8200000 | 0.019 | 1.034 | normal |
| chr10 | 8200001 | 8300000 | 0.048 | 0.930 | normal |
| chr10 | 8300001 | 8400000 | 0.078 | 0.983 | normal |
| chr10 | 8400001 | 8500000 | 0.084 | 0.901 | normal |
| chr10 | 8500001 | 8600000 | 0.211 | 0.426 | normal |
| chr10 | 8600001 | 8700000 | 0.092 | 0.916 | normal |
| chr10 | 8700001 | 8800000 | 0.183 | 1.512 | normal |
| chr10 | 8800001 | 8900000 | 0.063 | 0.902 | normal |
| chr10 | 8900001 | 9000000 | 0.077 | 1.396 | normal |
| chr10 | 9000001 | 9100000 | 0.056 | 0.950 | normal |
| chr10 | 9100001 | 9200000 | 0.057 | 0.949 | normal |
| chr10 | 9200001 | 9300000 | 0.063 | 0.919 | normal |
| chr10 | 9300001 | 9400000 | 0.069 | 0.970 | normal |
| chr10 | 9400001 | 9500000 | 0.064 | 1.076 | normal |
| chr10 | 9500001 | 9600000 | 0.083 | 1.189 | normal |
| chr10 | 9600001 | 9700000 | 0.048 | 1.436 | normal |

|       |          |          |       |       |        |
|-------|----------|----------|-------|-------|--------|
| chr10 | 9700001  | 9800000  | 0.067 | 1.000 | normal |
| chr10 | 9800001  | 9900000  | 0.171 | 1.054 | normal |
| chr10 | 9900001  | 10000000 | 0.166 | 1.344 | normal |
| chr10 | 10000001 | 10100000 | 0.069 | 0.983 | normal |
| chr10 | 10100001 | 10200000 | 0.073 | 1.087 | normal |
| chr10 | 10200001 | 10300000 | 0.087 | 1.057 | normal |
| chr10 | 10300001 | 10400000 | 0.117 | 1.250 | normal |
| chr10 | 10400001 | 10500000 | 0.125 | 1.566 | normal |
| chr10 | 10500001 | 10600000 | 0.105 | 1.190 | normal |
| chr10 | 10600001 | 10700000 | 0.045 | 1.149 | normal |
| chr10 | 10700001 | 10800000 | 0.035 | 1.060 | normal |
| chr10 | 10800001 | 10900000 | 0.020 | 1.192 | normal |
| chr10 | 10900001 | 11000000 | 0.013 | 1.111 | normal |
| chr10 | 11000001 | 11100000 | 0.015 | 0.998 | normal |
| chr10 | 11100001 | 11200000 | 0.041 | 1.050 | normal |
| chr10 | 11200001 | 11300000 | 0.070 | 1.029 | normal |
| chr10 | 11300001 | 11400000 | 0.021 | 1.024 | normal |
| chr10 | 11400001 | 11500000 | 0.075 | 0.905 | normal |
| chr10 | 11500001 | 11600000 | 0.039 | 1.199 | normal |
| chr10 | 11600001 | 11700000 | 0.015 | 1.048 | normal |
| chr10 | 11700001 | 11800000 | 0.031 | 0.914 | normal |
| chr10 | 11800001 | 11900000 | 0.101 | 0.758 | normal |
| chr10 | 11900001 | 12000000 | 0.107 | 0.806 | normal |
| chr10 | 12000001 | 12100000 | 0.117 | 1.282 | normal |
| chr10 | 12100001 | 12200000 | 0.098 | 1.244 | normal |
| chr10 | 12200001 | 12300000 | 0.063 | 1.021 | normal |
| chr10 | 12300001 | 12400000 | 0.161 | 0.671 | normal |
| chr10 | 12400001 | 12500000 | 0.086 | 0.714 | normal |
| chr10 | 12500001 | 12600000 | 0.020 | 0.953 | normal |
| chr10 | 12600001 | 12700000 | 0.002 | 0.966 | normal |
| chr10 | 12700001 | 12800000 | 0.012 | 0.951 | normal |
| chr10 | 12800001 | 12900000 | 0.046 | 0.973 | normal |
| chr10 | 12900001 | 13000000 | 0.047 | 0.763 | normal |
| chr10 | 13000001 | 13100000 | 0.022 | 1.131 | normal |
| chr10 | 13100001 | 13200000 | 0.070 | 1.318 | normal |
| chr10 | 13200001 | 13300000 | 0.008 | 0.944 | normal |
| chr10 | 13300001 | 13400000 | 0.049 | 1.020 | normal |
| chr10 | 13400001 | 13500000 | 0.094 | 0.989 | normal |
| chr10 | 13500001 | 13600000 | 0.275 | 1.007 | normal |
| chr10 | 13600001 | 13700000 | 0.194 | 1.361 | normal |
| chr10 | 13700001 | 13800000 | 0.178 | 1.563 | sig    |
| chr10 | 13800001 | 13900000 | 0.235 | 1.411 | normal |
| chr10 | 13900001 | 14000000 | 0.116 | 1.219 | normal |
| chr10 | 14000001 | 14100000 | 0.065 | 1.340 | normal |



|       |          |          |       |       |        |
|-------|----------|----------|-------|-------|--------|
| chr10 | 14100001 | 14200000 | 0.047 | 1.377 | normal |
| chr10 | 14200001 | 14300000 | 0.044 | 1.227 | normal |
| chr10 | 14300001 | 14400000 | 0.072 | 1.328 | normal |
| chr10 | 14400001 | 14500000 | 0.070 | 1.290 | normal |
| chr10 | 14500001 | 14600000 | 0.051 | 1.177 | normal |
| chr10 | 14600001 | 14700000 | 0.066 | 1.297 | normal |
| chr10 | 14700001 | 14800000 | 0.060 | 1.236 | normal |
| chr10 | 14800001 | 14900000 | 0.069 | 1.155 | normal |
| chr10 | 14900001 | 15000000 | 0.083 | 0.765 | normal |
| chr10 | 15000001 | 15100000 | 0.080 | 1.495 | normal |
| chr10 | 15100001 | 15200000 | 0.069 | 1.200 | normal |
| chr10 | 15200001 | 15300000 | 0.046 | 1.116 | normal |
| chr10 | 15300001 | 15400000 | 0.072 | 1.016 | normal |
| chr10 | 15400001 | 15500000 | 0.115 | 1.373 | normal |
| chr10 | 15500001 | 15600000 | 0.097 | 1.273 | normal |
| chr10 | 15600001 | 15700000 | 0.104 | 1.332 | normal |
| chr10 | 15700001 | 15800000 | 0.150 | 1.452 | normal |
| chr10 | 15800001 | 15900000 | 0.139 | 0.651 | normal |
| chr10 | 15900001 | 16000000 | 0.098 | 0.974 | normal |
| chr10 | 16000001 | 16100000 | 0.083 | 1.074 | normal |
| chr10 | 16100001 | 16200000 | 0.098 | 0.904 | normal |
| chr10 | 16200001 | 16300000 | 0.121 | 0.805 | normal |
| chr10 | 16300001 | 16400000 | 0.092 | 0.938 | normal |
| chr10 | 16400001 | 16500000 | 0.113 | 1.455 | normal |
| chr10 | 16500001 | 16600000 | 0.201 | 1.991 | sig    |
| chr10 | 16600001 | 16700000 | 0.285 | 1.764 | sig    |
| chr10 | 16700001 | 16800000 | 0.146 | 1.235 | normal |
| chr10 | 16800001 | 16900000 | 0.038 | 1.111 | normal |
| chr10 | 16900001 | 17000000 | 0.098 | 1.009 | normal |
| chr10 | 17000001 | 17100000 | 0.038 | 0.991 | normal |
| chr10 | 17100001 | 17200000 | 0.077 | 1.096 | normal |
| chr10 | 17200001 | 17300000 | 0.063 | 1.049 | normal |
| chr10 | 17300001 | 17400000 | 0.072 | 1.236 | normal |
| chr10 | 17400001 | 17500000 | 0.028 | 1.053 | normal |
| chr10 | 17500001 | 17600000 | 0.025 | 1.182 | normal |
| chr10 | 17600001 | 17700000 | 0.010 | 1.073 | normal |
| chr10 | 17700001 | 17800000 | 0.071 | 1.332 | normal |
| chr10 | 17800001 | 17900000 | 0.087 | 1.734 | normal |
| chr10 | 17900001 | 18000000 | 0.105 | 1.311 | normal |
| chr10 | 18000001 | 18100000 | 0.080 | 1.479 | normal |
| chr10 | 18100001 | 18200000 | 0.047 | 1.353 | normal |
| chr10 | 18200001 | 18300000 | 0.090 | 0.969 | normal |
| chr10 | 18300001 | 18400000 | 0.040 | 1.093 | normal |
| chr10 | 18400001 | 18500000 | 0.024 | 1.556 | normal |

|       |          |          |       |       |        |
|-------|----------|----------|-------|-------|--------|
| chr10 | 18500001 | 18600000 | 0.064 | 0.949 | normal |
| chr10 | 18600001 | 18700000 | 0.084 | 1.064 | normal |
| chr10 | 18700001 | 18800000 | 0.042 | 1.075 | normal |
| chr10 | 18800001 | 18900000 | 0.025 | 0.892 | normal |
| chr10 | 18900001 | 19000000 | 0.067 | 1.039 | normal |
| chr10 | 19000001 | 19100000 | 0.053 | 1.228 | normal |
| chr10 | 19100001 | 19200000 | 0.097 | 0.802 | normal |
| chr10 | 19200001 | 19300000 | 0.134 | 0.701 | normal |
| chr10 | 19300001 | 19400000 | 0.103 | 0.903 | normal |
| chr10 | 19400001 | 19500000 | 0.106 | 0.565 | normal |
| chr10 | 19500001 | 19600000 | 0.041 | 1.063 | normal |
| chr10 | 19600001 | 19700000 | 0.074 | 1.195 | normal |
| chr10 | 19700001 | 19800000 | 0.066 | 0.769 | normal |
| chr10 | 19800001 | 19900000 | 0.059 | 1.047 | normal |
| chr10 | 19900001 | 20000000 | 0.033 | 0.944 | normal |
| chr10 | 20000001 | 20100000 | 0.054 | 1.004 | normal |
| chr10 | 20100001 | 20200000 | 0.050 | 1.020 | normal |
| chr10 | 20200001 | 20300000 | 0.040 | 0.933 | normal |
| chr10 | 20300001 | 20400000 | 0.064 | 1.548 | normal |
| chr10 | 20400001 | 20500000 | 0.081 | 1.599 | normal |
| chr10 | 20500001 | 20600000 | 0.067 | 1.306 | normal |
| chr10 | 20600001 | 20700000 | 0.112 | 1.211 | normal |
| chr10 | 20700001 | 20800000 | 0.095 | 1.009 | normal |
| chr10 | 20800001 | 20900000 | 0.060 | 1.088 | normal |
| chr10 | 20900001 | 21000000 | 0.056 | 0.889 | normal |
| chr10 | 21000001 | 21100000 | 0.073 | 1.182 | normal |
| chr10 | 21100001 | 21200000 | 0.042 | 1.077 | normal |
| chr10 | 21200001 | 21300000 | 0.090 | 0.890 | normal |
| chr10 | 21300001 | 21400000 | 0.054 | 1.222 | normal |
| chr10 | 21400001 | 21500000 | 0.059 | 1.054 | normal |
| chr10 | 21500001 | 21600000 | 0.056 | 0.899 | normal |
| chr10 | 21600001 | 21700000 | 0.044 | 0.947 | normal |
| chr10 | 21700001 | 21800000 | 0.036 | 1.212 | normal |
| chr10 | 21800001 | 21900000 | 0.051 | 1.012 | normal |
| chr10 | 21900001 | 22000000 | 0.062 | 1.532 | normal |
| chr10 | 22000001 | 22100000 | 0.026 | 1.074 | normal |
| chr10 | 22100001 | 22200000 | 0.025 | 1.010 | normal |
| chr10 | 22200001 | 22300000 | 0.076 | 1.023 | normal |
| chr10 | 22300001 | 22400000 | 0.035 | 1.094 | normal |
| chr10 | 22400001 | 22500000 | 0.042 | 1.068 | normal |
| chr10 | 22500001 | 22600000 | 0.035 | 1.015 | normal |
| chr10 | 22600001 | 22700000 | 0.051 | 1.146 | normal |
| chr10 | 22700001 | 22800000 | 0.045 | 1.114 | normal |
| chr10 | 22800001 | 22900000 | 0.055 | 1.088 | normal |

|       |          |          |       |       |        |
|-------|----------|----------|-------|-------|--------|
| chr10 | 22900001 | 23000000 | 0.078 | 0.824 | normal |
| chr10 | 23000001 | 23100000 | 0.042 | 1.123 | normal |
| chr10 | 23100001 | 23200000 | 0.049 | 1.171 | normal |
| chr10 | 23200001 | 23300000 | 0.042 | 1.080 | normal |
| chr10 | 23300001 | 23400000 | 0.052 | 0.917 | normal |
| chr10 | 23400001 | 23500000 | 0.050 | 1.089 | normal |
| chr10 | 23500001 | 23600000 | 0.098 | 1.418 | normal |
| chr10 | 23600001 | 23700000 | 0.047 | 1.202 | normal |
| chr10 | 23700001 | 23800000 | 0.066 | 1.303 | normal |
| chr10 | 23800001 | 23900000 | 0.031 | 1.183 | normal |
| chr10 | 23900001 | 24000000 | 0.043 | 1.064 | normal |
| chr10 | 24000001 | 24100000 | 0.041 | 1.056 | normal |
| chr10 | 24100001 | 24200000 | 0.062 | 1.204 | normal |
| chr10 | 24200001 | 24300000 | 0.075 | 1.144 | normal |
| chr10 | 24300001 | 24400000 | 0.063 | 1.227 | normal |
| chr10 | 24400001 | 24500000 | 0.088 | 0.903 | normal |
| chr10 | 24500001 | 24600000 | 0.068 | 1.100 | normal |
| chr10 | 24600001 | 24700000 | 0.072 | 1.504 | normal |
| chr10 | 24700001 | 24800000 | 0.042 | 1.104 | normal |
| chr10 | 24800001 | 24900000 | 0.048 | 1.130 | normal |
| chr10 | 24900001 | 25000000 | 0.049 | 1.117 | normal |
| chr10 | 25000001 | 25100000 | 0.075 | 1.143 | normal |
| chr10 | 25100001 | 25200000 | 0.044 | 1.156 | normal |
| chr10 | 25200001 | 25300000 | 0.086 | 1.501 | normal |
| chr10 | 25300001 | 25400000 | 0.090 | 1.610 | normal |
| chr10 | 25400001 | 25500000 | 0.052 | 1.414 | normal |
| chr10 | 25500001 | 25600000 | 0.074 | 1.587 | normal |
| chr10 | 25600001 | 25700000 | 0.062 | 1.290 | normal |
| chr10 | 25700001 | 25800000 | 0.067 | 1.182 | normal |
| chr10 | 25800001 | 25900000 | 0.086 | 1.254 | normal |
| chr10 | 25900001 | 26000000 | 0.031 | 0.948 | normal |
| chr10 | 26000001 | 26100000 | 0.030 | 1.095 | normal |
| chr10 | 26100001 | 26200000 | 0.023 | 0.970 | normal |
| chr10 | 26200001 | 26300000 | 0.042 | 1.587 | normal |
| chr10 | 26300001 | 26400000 | 0.034 | 1.217 | normal |
| chr10 | 26400001 | 26500000 | 0.062 | 1.148 | normal |
| chr10 | 26500001 | 26600000 | 0.089 | 1.070 | normal |
| chr10 | 26600001 | 26700000 | 0.065 | 1.463 | normal |
| chr10 | 26700001 | 26800000 | 0.080 | 1.700 | normal |
| chr10 | 26800001 | 26900000 | 0.016 | 1.046 | normal |
| chr10 | 26900001 | 27000000 | 0.037 | 1.438 | normal |
| chr10 | 27000001 | 27100000 | 0.031 | 1.016 | normal |
| chr10 | 27100001 | 27200000 | 0.063 | 1.205 | normal |
| chr10 | 27200001 | 27300000 | 0.068 | 1.045 | normal |

|       |          |          |       |       |        |
|-------|----------|----------|-------|-------|--------|
| chr10 | 27300001 | 27400000 | 0.046 | 1.244 | normal |
| chr10 | 27400001 | 27500000 | 0.055 | 2.243 | normal |
| chr10 | 27500001 | 27600000 | 0.042 | 0.871 | normal |
| chr10 | 27600001 | 27700000 | 0.044 | 0.947 | normal |
| chr10 | 27700001 | 27800000 | 0.069 | 1.215 | normal |
| chr10 | 27800001 | 27900000 | 0.097 | 1.344 | normal |
| chr10 | 27900001 | 28000000 | 0.030 | 1.142 | normal |
| chr10 | 28000001 | 28100000 | 0.065 | 1.326 | normal |
| chr10 | 28100001 | 28200000 | 0.049 | 1.172 | normal |
| chr10 | 28200001 | 28300000 | 0.057 | 0.935 | normal |
| chr10 | 28300001 | 28400000 | 0.022 | 0.865 | normal |
| chr10 | 28400001 | 28500000 | 0.041 | 1.173 | normal |
| chr10 | 28500001 | 28600000 | 0.102 | 1.096 | normal |
| chr10 | 28600001 | 28700000 | 0.064 | 1.118 | normal |
| chr10 | 28700001 | 28800000 | 0.036 | 1.014 | normal |
| chr10 | 28800001 | 28900000 | 0.101 | 1.337 | normal |
| chr10 | 28900001 | 29000000 | 0.061 | 1.476 | normal |
| chr10 | 29000001 | 29100000 | 0.049 | 0.811 | normal |
| chr10 | 29100001 | 29200000 | 0.075 | 1.634 | normal |
| chr10 | 29200001 | 29300000 | 0.086 | 1.218 | normal |
| chr10 | 29300001 | 29400000 | 0.074 | 0.835 | normal |
| chr10 | 29400001 | 29500000 | 0.208 | 1.562 | sig    |
| chr10 | 29500001 | 29600000 | 0.079 | 1.263 | normal |
| chr10 | 29600001 | 29700000 | 0.172 | 2.389 | sig    |
| chr10 | 29700001 | 29800000 | 0.201 | 1.430 | normal |
| chr10 | 29800001 | 29900000 | 0.128 | 1.151 | normal |
| chr10 | 29900001 | 30000000 | 0.067 | 1.158 | normal |
| chr10 | 30000001 | 30100000 | 0.090 | 1.493 | normal |
| chr10 | 30100001 | 30200000 | 0.096 | 0.948 | normal |
| chr10 | 30200001 | 30300000 | 0.108 | 1.255 | normal |
| chr10 | 30300001 | 30400000 | 0.142 | 0.705 | normal |
| chr10 | 30400001 | 30500000 | 0.140 | 0.887 | normal |
| chr10 | 30500001 | 30600000 | 0.071 | 0.740 | normal |
| chr10 | 30600001 | 30700000 | 0.041 | 0.795 | normal |
| chr10 | 30700001 | 30800000 | 0.026 | 0.886 | normal |
| chr10 | 30800001 | 30900000 | 0.034 | 0.769 | normal |
| chr10 | 30900001 | 31000000 | 0.031 | 0.708 | normal |
| chr10 | 31000001 | 31100000 | 0.031 | 0.757 | normal |
| chr10 | 31100001 | 31200000 | 0.030 | 0.715 | normal |
| chr10 | 31200001 | 31300000 | 0.028 | 0.802 | normal |
| chr10 | 31300001 | 31400000 | 0.109 | 0.778 | normal |
| chr10 | 31400001 | 31500000 | 0.120 | 1.182 | normal |
| chr10 | 31500001 | 31600000 | 0.035 | 0.954 | normal |
| chr10 | 31600001 | 31700000 | 0.075 | 1.135 | normal |

|       |          |          |       |       |        |
|-------|----------|----------|-------|-------|--------|
| chr10 | 31700001 | 31800000 | 0.063 | 1.256 | normal |
| chr10 | 31800001 | 31900000 | 0.152 | 1.036 | normal |
| chr10 | 31900001 | 32000000 | 0.107 | 0.640 | normal |
| chr10 | 32000001 | 32100000 | 0.079 | 1.386 | normal |
| chr10 | 32100001 | 32200000 | 0.089 | 0.978 | normal |
| chr10 | 32200001 | 32300000 | 0.073 | 1.017 | normal |
| chr10 | 32300001 | 32400000 | 0.078 | 1.104 | normal |
| chr10 | 32400001 | 32500000 | 0.051 | 1.000 | normal |
| chr10 | 32500001 | 32600000 | 0.206 | 2.547 | sig    |
| chr10 | 32600001 | 32700000 | 0.214 | 2.793 | sig    |
| chr10 | 32700001 | 32800000 | 0.029 | 0.924 | normal |
| chr10 | 32800001 | 32900000 | 0.082 | 1.576 | normal |
| chr10 | 32900001 | 33000000 | 0.083 | 0.729 | normal |
| chr10 | 33000001 | 33100000 | 0.106 | 1.257 | normal |
| chr10 | 33100001 | 33200000 | 0.102 | 1.667 | normal |
| chr10 | 33200001 | 33300000 | 0.085 | 1.383 | normal |
| chr10 | 33300001 | 33400000 | 0.083 | 1.202 | normal |
| chr10 | 33400001 | 33500000 | 0.103 | 1.237 | normal |
| chr10 | 33500001 | 33600000 | 0.121 | 0.794 | normal |
| chr10 | 33600001 | 33700000 | 0.108 | 1.154 | normal |
| chr10 | 33700001 | 33800000 | 0.075 | 1.172 | normal |
| chr10 | 33800001 | 33900000 | 0.097 | 1.060 | normal |
| chr10 | 33900001 | 34000000 | 0.029 | 1.111 | normal |
| chr10 | 34000001 | 34100000 | 0.036 | 0.985 | normal |
| chr10 | 34100001 | 34200000 | 0.078 | 1.114 | normal |
| chr10 | 34200001 | 34300000 | 0.234 | 1.389 | normal |
| chr10 | 34300001 | 34400000 | 0.068 | 0.973 | normal |
| chr10 | 34400001 | 34500000 | 0.038 | 0.983 | normal |
| chr10 | 34500001 | 34600000 | 0.104 | 1.680 | normal |
| chr10 | 34600001 | 34700000 | 0.112 | 1.161 | normal |
| chr10 | 34700001 | 34800000 | 0.129 | 1.156 | normal |
| chr10 | 34800001 | 34900000 | 0.062 | 1.243 | normal |
| chr10 | 34900001 | 35000000 | 0.078 | 1.310 | normal |
| chr10 | 35000001 | 35100000 | 0.123 | 1.381 | normal |
| chr10 | 35100001 | 35200000 | 0.070 | 1.560 | normal |
| chr10 | 35200001 | 35300000 | 0.152 | 1.443 | normal |
| chr10 | 35300001 | 35400000 | 0.128 | 1.159 | normal |
| chr10 | 35400001 | 35500000 | 0.068 | 1.091 | normal |
| chr10 | 35500001 | 35600000 | 0.047 | 1.036 | normal |
| chr10 | 35600001 | 35700000 | 0.070 | 1.449 | normal |
| chr10 | 35700001 | 35800000 | 0.102 | 2.670 | normal |
| chr10 | 35800001 | 35900000 | 0.076 | 1.616 | normal |
| chr10 | 35900001 | 36000000 | 0.129 | 1.129 | normal |
| chr10 | 36000001 | 36100000 | 0.180 | 0.914 | normal |

|       |          |          |       |       |        |
|-------|----------|----------|-------|-------|--------|
| chr10 | 36100001 | 36200000 | 0.029 | 0.984 | normal |
| chr10 | 36200001 | 36300000 | 0.081 | 1.027 | normal |
| chr10 | 36300001 | 36400000 | 0.095 | 1.109 | normal |
| chr10 | 36400001 | 36500000 | 0.166 | 0.770 | normal |
| chr10 | 36500001 | 36600000 | 0.066 | 1.134 | normal |
| chr10 | 36600001 | 36700000 | 0.050 | 1.299 | normal |
| chr10 | 36700001 | 36800000 | 0.046 | 1.189 | normal |
| chr10 | 36800001 | 36900000 | 0.027 | 1.074 | normal |
| chr10 | 36900001 | 37000000 | 0.024 | 0.955 | normal |
| chr10 | 37000001 | 37100000 | 0.039 | 1.060 | normal |
| chr10 | 37100001 | 37200000 | 0.040 | 1.049 | normal |
| chr10 | 37200001 | 37300000 | 0.072 | 1.064 | normal |
| chr10 | 37300001 | 37400000 | 0.043 | 1.104 | normal |
| chr10 | 37400001 | 37500000 | 0.018 | 1.013 | normal |
| chr10 | 37500001 | 37600000 | 0.032 | 1.005 | normal |
| chr10 | 37600001 | 37700000 | 0.040 | 1.084 | normal |
| chr10 | 37700001 | 37800000 | 0.017 | 1.087 | normal |
| chr10 | 37800001 | 37900000 | 0.041 | 0.958 | normal |
| chr10 | 37900001 | 38000000 | 0.025 | 0.964 | normal |
| chr10 | 38000001 | 38100000 | 0.025 | 0.905 | normal |
| chr10 | 38100001 | 38200000 | 0.028 | 1.037 | normal |
| chr10 | 38200001 | 38300000 | 0.056 | 0.946 | normal |
| chr10 | 38300001 | 38400000 | 0.060 | 1.389 | normal |
| chr10 | 38400001 | 38500000 | 0.047 | 1.101 | normal |
| chr10 | 38500001 | 38600000 | 0.079 | 1.080 | normal |
| chr10 | 38600001 | 38700000 | 0.066 | 1.179 | normal |
| chr10 | 38700001 | 38800000 | 0.049 | 1.101 | normal |
| chr10 | 38800001 | 38900000 | 0.062 | 0.737 | normal |
| chr10 | 38900001 | 39000000 | 0.040 | 1.315 | normal |
| chr10 | 39000001 | 39100000 | 0.072 | 1.159 | normal |
| chr10 | 39100001 | 39200000 | 0.032 | 1.092 | normal |
| chr10 | 39200001 | 39300000 | 0.056 | 1.240 | normal |
| chr10 | 39300001 | 39400000 | 0.024 | 0.947 | normal |
| chr10 | 39400001 | 39500000 | 0.059 | 1.208 | normal |
| chr10 | 39500001 | 39600000 | 0.091 | 1.627 | normal |
| chr10 | 39600001 | 39700000 | 0.104 | 1.507 | normal |
| chr10 | 39700001 | 39800000 | 0.073 | 1.139 | normal |
| chr10 | 39800001 | 39900000 | 0.090 | 1.260 | normal |
| chr10 | 39900001 | 40000000 | 0.091 | 1.390 | normal |
| chr10 | 40000001 | 40100000 | 0.057 | 1.208 | normal |
| chr10 | 40100001 | 40200000 | 0.053 | 1.019 | normal |
| chr10 | 40200001 | 40300000 | 0.112 | 0.769 | normal |
| chr10 | 40300001 | 40400000 | 0.119 | 0.741 | normal |
| chr10 | 40400001 | 40500000 | 0.046 | 1.297 | normal |

|       |          |          |       |       |        |
|-------|----------|----------|-------|-------|--------|
| chr10 | 40500001 | 40600000 | 0.083 | 1.331 | normal |
| chr10 | 40600001 | 40700000 | 0.064 | 1.050 | normal |
| chr10 | 40700001 | 40800000 | 0.080 | 0.735 | normal |
| chr10 | 40800001 | 40900000 | 0.177 | 1.320 | normal |
| chr10 | 40900001 | 41000000 | 0.066 | 1.421 | normal |
| chr10 | 41000001 | 41100000 | 0.042 | 1.025 | normal |
| chr10 | 41100001 | 41200000 | 0.075 | 0.839 | normal |
| chr10 | 41200001 | 41300000 | 0.061 | 1.502 | normal |
| chr10 | 41300001 | 41400000 | 0.106 | 0.905 | normal |
| chr10 | 41400001 | 41500000 | 0.088 | 0.811 | normal |
| chr10 | 41500001 | 41600000 | 0.039 | 1.103 | normal |
| chr10 | 41600001 | 41700000 | 0.048 | 1.074 | normal |
| chr10 | 41700001 | 41800000 | 0.040 | 1.099 | normal |
| chr10 | 41800001 | 41900000 | 0.071 | 1.191 | normal |
| chr10 | 41900001 | 42000000 | 0.044 | 1.057 | normal |
| chr10 | 42000001 | 42100000 | 0.093 | 1.115 | normal |
| chr10 | 42100001 | 42200000 | 0.075 | 1.045 | normal |
| chr10 | 42200001 | 42300000 | 0.105 | 1.042 | normal |
| chr10 | 42300001 | 42400000 | 0.163 | 1.889 | sig    |
| chr10 | 42400001 | 42500000 | 0.049 | 0.957 | normal |
| chr10 | 42500001 | 42600000 | 0.052 | 1.012 | normal |
| chr10 | 42600001 | 42700000 | 0.043 | 0.996 | normal |
| chr10 | 42700001 | 42800000 | 0.066 | 1.301 | normal |
| chr10 | 42800001 | 42900000 | 0.037 | 1.255 | normal |
| chr10 | 42900001 | 43000000 | 0.046 | 1.097 | normal |
| chr10 | 43000001 | 43100000 | 0.070 | 1.317 | normal |
| chr10 | 43100001 | 43200000 | 0.102 | 1.022 | normal |
| chr10 | 43200001 | 43300000 | 0.014 | 0.941 | normal |
| chr10 | 43300001 | 43400000 | 0.031 | 0.926 | normal |
| chr10 | 43400001 | 43500000 | 0.034 | 0.919 | normal |
| chr10 | 43500001 | 43600000 | 0.014 | 1.038 | normal |
| chr10 | 43600001 | 43700000 | 0.050 | 1.046 | normal |
| chr10 | 43700001 | 43800000 | 0.053 | 0.961 | normal |
| chr10 | 43800001 | 43900000 | 0.069 | 0.918 | normal |
| chr10 | 43900001 | 44000000 | 0.070 | 1.157 | normal |
| chr10 | 44000001 | 44100000 | 0.132 | 0.717 | normal |
| chr10 | 44100001 | 44200000 | 0.065 | 1.571 | normal |
| chr10 | 44200001 | 44300000 | 0.053 | 0.968 | normal |
| chr10 | 44300001 | 44400000 | 0.034 | 0.996 | normal |
| chr10 | 44400001 | 44500000 | 0.045 | 1.036 | normal |
| chr10 | 44500001 | 44600000 | 0.052 | 1.088 | normal |
| chr10 | 44600001 | 44700000 | 0.066 | 1.131 | normal |
| chr10 | 44700001 | 44800000 | 0.079 | 0.922 | normal |
| chr10 | 44800001 | 44900000 | 0.056 | 0.945 | normal |

|       |          |          |       |       |        |
|-------|----------|----------|-------|-------|--------|
| chr10 | 44900001 | 45000000 | 0.064 | 1.267 | normal |
| chr10 | 45000001 | 45100000 | 0.057 | 0.994 | normal |
| chr10 | 45100001 | 45200000 | 0.060 | 0.769 | normal |
| chr10 | 45200001 | 45300000 | 0.020 | 0.990 | normal |
| chr10 | 45300001 | 45400000 | 0.050 | 0.940 | normal |
| chr10 | 45400001 | 45500000 | 0.093 | 0.985 | normal |
| chr10 | 45500001 | 45600000 | 0.099 | 0.938 | normal |
| chr10 | 45600001 | 45700000 | 0.067 | 0.820 | normal |
| chr10 | 45700001 | 45800000 | 0.071 | 1.045 | normal |
| chr10 | 45800001 | 45900000 | 0.040 | 1.108 | normal |
| chr10 | 45900001 | 46000000 | 0.147 | 1.021 | normal |
| chr10 | 46000001 | 46100000 | 0.096 | 0.838 | normal |
| chr10 | 46100001 | 46200000 | 0.096 | 1.010 | normal |
| chr10 | 46200001 | 46300000 | 0.060 | 1.012 | normal |
| chr10 | 46300001 | 46400000 | 0.076 | 1.644 | normal |
| chr10 | 46400001 | 46500000 | 0.092 | 1.098 | normal |
| chr10 | 46500001 | 46600000 | 0.043 | 1.025 | normal |
| chr10 | 46600001 | 46700000 | 0.050 | 1.035 | normal |
| chr10 | 46700001 | 46800000 | 0.095 | 1.309 | normal |
| chr10 | 46800001 | 46900000 | 0.098 | 0.950 | normal |
| chr10 | 46900001 | 47000000 | 0.087 | 1.015 | normal |
| chr10 | 47000001 | 47100000 | 0.054 | 0.954 | normal |
| chr10 | 47100001 | 47200000 | 0.179 | 0.645 | normal |
| chr10 | 47200001 | 47300000 | 0.203 | 0.712 | normal |
| chr10 | 47300001 | 47400000 | 0.121 | 0.950 | normal |
| chr10 | 47400001 | 47500000 | 0.071 | 1.022 | normal |
| chr10 | 47500001 | 47600000 | 0.076 | 1.069 | normal |
| chr10 | 47600001 | 47700000 | 0.095 | 1.030 | normal |
| chr10 | 47700001 | 47800000 | 0.082 | 1.060 | normal |
| chr10 | 47800001 | 47900000 | 0.034 | 0.946 | normal |
| chr10 | 47900001 | 48000000 | 0.106 | 1.985 | normal |
| chr10 | 48000001 | 48100000 | 0.081 | 0.934 | normal |
| chr10 | 48100001 | 48200000 | 0.053 | 1.141 | normal |
| chr10 | 48200001 | 48300000 | 0.016 | 0.881 | normal |
| chr10 | 48300001 | 48400000 | 0.032 | 1.018 | normal |
| chr10 | 48400001 | 48500000 | 0.107 | 0.852 | normal |
| chr10 | 48500001 | 48600000 | 0.085 | 1.042 | normal |
| chr10 | 48600001 | 48700000 | 0.029 | 1.122 | normal |
| chr10 | 48700001 | 48800000 | 0.044 | 0.958 | normal |
| chr10 | 48800001 | 48900000 | 0.071 | 0.946 | normal |
| chr10 | 48900001 | 49000000 | 0.042 | 0.937 | normal |
| chr10 | 49000001 | 49100000 | 0.049 | 0.989 | normal |
| chr10 | 49100001 | 49200000 | 0.078 | 1.019 | normal |
| chr10 | 49200001 | 49300000 | 0.063 | 1.104 | normal |



|       |          |          |       |       |        |
|-------|----------|----------|-------|-------|--------|
| chr10 | 49300001 | 49400000 | 0.044 | 1.073 | normal |
| chr10 | 49400001 | 49500000 | 0.047 | 1.112 | normal |
| chr10 | 49500001 | 49600000 | 0.038 | 1.036 | normal |
| chr10 | 49600001 | 49700000 | 0.045 | 0.909 | normal |
| chr10 | 49700001 | 49800000 | 0.030 | 0.959 | normal |
| chr10 | 49800001 | 49900000 | 0.049 | 0.808 | normal |
| chr10 | 49900001 | 50000000 | 0.057 | 1.011 | normal |
| chr10 | 50000001 | 50100000 | 0.074 | 0.903 | normal |
| chr10 | 50100001 | 50200000 | 0.116 | 0.841 | normal |
| chr10 | 50200001 | 50300000 | 0.125 | 0.844 | normal |
| chr10 | 50300001 | 50400000 | 0.145 | 0.763 | normal |
| chr10 | 50400001 | 50500000 | 0.149 | 0.675 | normal |
| chr10 | 50500001 | 50600000 | 0.065 | 2.367 | normal |
| chr10 | 50600001 | 50700000 | 0.000 | 1.123 | normal |
| chr10 | 50700001 | 50800000 | 0.051 | 1.214 | normal |
| chr10 | 50800001 | 50900000 | 0.119 | 0.760 | normal |
| chr10 | 50900001 | 51000000 | 0.074 | 1.233 | normal |
| chr10 | 51000001 | 51100000 | 0.090 | 0.906 | normal |
| chr10 | 51100001 | 51200000 | 0.044 | 0.970 | normal |
| chr10 | 51200001 | 51300000 | 0.096 | 1.503 | normal |
| chr10 | 51300001 | 51400000 | 0.033 | 1.086 | normal |
| chr10 | 51400001 | 51500000 | 0.061 | 1.271 | normal |
| chr10 | 51500001 | 51600000 | 0.062 | 1.230 | normal |
| chr10 | 51600001 | 51700000 | 0.047 | 0.950 | normal |
| chr10 | 51700001 | 51800000 | 0.056 | 0.993 | normal |
| chr10 | 51800001 | 51900000 | 0.069 | 1.103 | normal |
| chr10 | 51900001 | 52000000 | 0.136 | 1.285 | normal |
| chr10 | 52000001 | 52100000 | 0.066 | 1.060 | normal |
| chr10 | 52100001 | 52200000 | 0.120 | 1.050 | normal |
| chr10 | 52200001 | 52300000 | 0.040 | 0.905 | normal |
| chr10 | 52300001 | 52400000 | 0.027 | 1.057 | normal |
| chr10 | 52400001 | 52500000 | 0.043 | 1.159 | normal |
| chr10 | 52500001 | 52600000 | 0.039 | 1.154 | normal |
| chr10 | 52600001 | 52700000 | 0.047 | 1.082 | normal |
| chr10 | 52700001 | 52800000 | 0.036 | 1.130 | normal |
| chr10 | 52800001 | 52900000 | 0.035 | 1.139 | normal |
| chr10 | 52900001 | 53000000 | 0.037 | 1.082 | normal |
| chr10 | 53000001 | 53100000 | 0.204 | 0.435 | normal |
| chr10 | 53100001 | 53200000 | 0.120 | 0.659 | normal |
| chr10 | 53200001 | 53300000 | 0.068 | 1.316 | normal |
| chr10 | 53300001 | 53400000 | 0.065 | 1.257 | normal |
| chr10 | 53400001 | 53500000 | 0.054 | 1.289 | normal |
| chr10 | 53500001 | 53600000 | 0.073 | 1.340 | normal |
| chr10 | 53600001 | 53700000 | 0.036 | 1.329 | normal |

|       |          |          |       |       |        |
|-------|----------|----------|-------|-------|--------|
| chr10 | 53700001 | 53800000 | 0.056 | 1.387 | normal |
| chr10 | 53800001 | 53900000 | 0.074 | 1.576 | normal |
| chr10 | 53900001 | 54000000 | 0.014 | 1.020 | normal |
| chr10 | 54000001 | 54100000 | 0.052 | 1.304 | normal |
| chr10 | 54100001 | 54200000 | 0.013 | 0.950 | normal |
| chr10 | 54200001 | 54300000 | 0.060 | 0.864 | normal |
| chr10 | 54300001 | 54400000 | 0.028 | 0.938 | normal |
| chr10 | 54400001 | 54500000 | 0.037 | 1.287 | normal |
| chr10 | 54500001 | 54600000 | 0.048 | 1.083 | normal |
| chr10 | 54600001 | 54700000 | 0.036 | 1.117 | normal |
| chr10 | 54700001 | 54800000 | 0.064 | 1.099 | normal |
| chr10 | 54800001 | 54900000 | 0.041 | 0.712 | normal |
| chr10 | 54900001 | 55000000 | 0.043 | 0.938 | normal |
| chr10 | 55000001 | 55100000 | 0.038 | 1.247 | normal |
| chr10 | 55100001 | 55200000 | 0.057 | 1.276 | normal |
| chr10 | 55200001 | 55300000 | 0.068 | 1.141 | normal |
| chr10 | 55300001 | 55400000 | 0.037 | 1.080 | normal |
| chr11 | 1        | 100000   | 0.020 | 1.085 | normal |
| chr11 | 100001   | 200000   | 0.018 | 1.146 | normal |
| chr11 | 200001   | 300000   | 0.019 | 0.967 | normal |
| chr11 | 300001   | 400000   | 0.026 | 0.928 | normal |
| chr11 | 400001   | 500000   | 0.030 | 1.031 | normal |
| chr11 | 500001   | 600000   | 0.039 | 1.093 | normal |
| chr11 | 600001   | 700000   | 0.049 | 0.873 | normal |
| chr11 | 700001   | 800000   | 0.069 | 1.243 | normal |
| chr11 | 800001   | 900000   | 0.029 | 0.984 | normal |
| chr11 | 900001   | 1000000  | 0.048 | 0.947 | normal |
| chr11 | 1000001  | 1100000  | 0.041 | 1.009 | normal |
| chr11 | 1100001  | 1200000  | 0.053 | 0.913 | normal |
| chr11 | 1200001  | 1300000  | 0.048 | 0.925 | normal |
| chr11 | 1300001  | 1400000  | 0.041 | 1.023 | normal |
| chr11 | 1400001  | 1500000  | 0.046 | 1.119 | normal |
| chr11 | 1500001  | 1600000  | 0.060 | 0.976 | normal |
| chr11 | 1600001  | 1700000  | 0.085 | 1.081 | normal |
| chr11 | 1700001  | 1800000  | 0.036 | 1.087 | normal |
| chr11 | 1800001  | 1900000  | 0.029 | 1.037 | normal |
| chr11 | 1900001  | 2000000  | 0.065 | 0.982 | normal |
| chr11 | 2000001  | 2100000  | 0.081 | 1.059 | normal |
| chr11 | 2100001  | 2200000  | 0.065 | 0.956 | normal |
| chr11 | 2200001  | 2300000  | 0.060 | 1.534 | normal |
| chr11 | 2300001  | 2400000  | 0.017 | 1.011 | normal |
| chr11 | 2400001  | 2500000  | 0.049 | 0.824 | normal |
| chr11 | 2500001  | 2600000  | 0.024 | 1.095 | normal |
| chr11 | 2600001  | 2700000  | 0.040 | 1.003 | normal |

|       |         |         |       |       |        |
|-------|---------|---------|-------|-------|--------|
| chr11 | 2700001 | 2800000 | 0.031 | 1.102 | normal |
| chr11 | 2800001 | 2900000 | 0.030 | 1.041 | normal |
| chr11 | 2900001 | 3000000 | 0.017 | 1.193 | normal |
| chr11 | 3000001 | 3100000 | 0.092 | 1.072 | normal |
| chr11 | 3100001 | 3200000 | 0.064 | 1.248 | normal |
| chr11 | 3200001 | 3300000 | 0.026 | 1.111 | normal |
| chr11 | 3300001 | 3400000 | 0.047 | 1.306 | normal |
| chr11 | 3400001 | 3500000 | 0.043 | 1.081 | normal |
| chr11 | 3500001 | 3600000 | 0.039 | 0.891 | normal |
| chr11 | 3600001 | 3700000 | 0.034 | 0.999 | normal |
| chr11 | 3700001 | 3800000 | 0.066 | 1.003 | normal |
| chr11 | 3800001 | 3900000 | 0.057 | 1.157 | normal |
| chr11 | 3900001 | 4000000 | 0.032 | 1.073 | normal |
| chr11 | 4000001 | 4100000 | 0.034 | 1.065 | normal |
| chr11 | 4100001 | 4200000 | 0.020 | 1.003 | normal |
| chr11 | 4200001 | 4300000 | 0.101 | 0.744 | normal |
| chr11 | 4300001 | 4400000 | 0.038 | 1.150 | normal |
| chr11 | 4400001 | 4500000 | 0.063 | 0.939 | normal |
| chr11 | 4500001 | 4600000 | 0.027 | 1.092 | normal |
| chr11 | 4600001 | 4700000 | 0.035 | 1.319 | normal |
| chr11 | 4700001 | 4800000 | 0.045 | 1.486 | normal |
| chr11 | 4800001 | 4900000 | 0.039 | 1.179 | normal |
| chr11 | 4900001 | 5000000 | 0.064 | 1.087 | normal |
| chr11 | 5000001 | 5100000 | 0.062 | 1.047 | normal |
| chr11 | 5100001 | 5200000 | 0.074 | 1.149 | normal |
| chr11 | 5200001 | 5300000 | 0.038 | 0.981 | normal |
| chr11 | 5300001 | 5400000 | 0.054 | 0.921 | normal |
| chr11 | 5400001 | 5500000 | 0.041 | 1.036 | normal |
| chr11 | 5500001 | 5600000 | 0.072 | 1.205 | normal |
| chr11 | 5600001 | 5700000 | 0.081 | 0.924 | normal |
| chr11 | 5700001 | 5800000 | 0.061 | 1.184 | normal |
| chr11 | 5800001 | 5900000 | 0.112 | 0.483 | normal |
| chr11 | 5900001 | 6000000 | 0.055 | 1.001 | normal |
| chr11 | 6000001 | 6100000 | 0.074 | 1.257 | normal |
| chr11 | 6100001 | 6200000 | 0.050 | 1.071 | normal |
| chr11 | 6200001 | 6300000 | 0.077 | 1.147 | normal |
| chr11 | 6300001 | 6400000 | 0.084 | 0.996 | normal |
| chr11 | 6400001 | 6500000 | 0.087 | 1.182 | normal |
| chr11 | 6500001 | 6600000 | 0.072 | 0.889 | normal |
| chr11 | 6600001 | 6700000 | 0.034 | 1.073 | normal |
| chr11 | 6700001 | 6800000 | 0.026 | 1.052 | normal |
| chr11 | 6800001 | 6900000 | 0.027 | 0.931 | normal |
| chr11 | 6900001 | 7000000 | 0.035 | 1.033 | normal |
| chr11 | 7000001 | 7100000 | 0.007 | 1.009 | normal |

|       |          |          |       |       |        |
|-------|----------|----------|-------|-------|--------|
| chr11 | 7100001  | 7200000  | 0.039 | 1.089 | normal |
| chr11 | 7200001  | 7300000  | 0.077 | 0.773 | normal |
| chr11 | 7300001  | 7400000  | 0.057 | 1.001 | normal |
| chr11 | 7400001  | 7500000  | 0.061 | 1.107 | normal |
| chr11 | 7500001  | 7600000  | 0.035 | 0.897 | normal |
| chr11 | 7600001  | 7700000  | 0.028 | 0.962 | normal |
| chr11 | 7700001  | 7800000  | 0.034 | 1.020 | normal |
| chr11 | 7800001  | 7900000  | 0.061 | 0.957 | normal |
| chr11 | 7900001  | 8000000  | 0.057 | 1.148 | normal |
| chr11 | 8000001  | 8100000  | 0.036 | 1.039 | normal |
| chr11 | 8100001  | 8200000  | 0.021 | 0.999 | normal |
| chr11 | 8200001  | 8300000  | 0.035 | 1.000 | normal |
| chr11 | 8300001  | 8400000  | 0.054 | 0.878 | normal |
| chr11 | 8400001  | 8500000  | 0.057 | 1.191 | normal |
| chr11 | 8500001  | 8600000  | 0.025 | 1.074 | normal |
| chr11 | 8600001  | 8700000  | 0.027 | 0.939 | normal |
| chr11 | 8700001  | 8800000  | 0.023 | 0.937 | normal |
| chr11 | 8800001  | 8900000  | 0.030 | 0.813 | normal |
| chr11 | 8900001  | 9000000  | 0.059 | 1.063 | normal |
| chr11 | 9000001  | 9100000  | 0.096 | 0.799 | normal |
| chr11 | 9100001  | 9200000  | 0.072 | 0.850 | normal |
| chr11 | 9200001  | 9300000  | 0.069 | 0.896 | normal |
| chr11 | 9300001  | 9400000  | 0.065 | 0.803 | normal |
| chr11 | 9400001  | 9500000  | 0.073 | 0.947 | normal |
| chr11 | 9500001  | 9600000  | 0.078 | 0.872 | normal |
| chr11 | 9600001  | 9700000  | 0.032 | 0.920 | normal |
| chr11 | 9700001  | 9800000  | 0.046 | 0.909 | normal |
| chr11 | 9800001  | 9900000  | 0.048 | 0.933 | normal |
| chr11 | 9900001  | 10000000 | 0.046 | 0.723 | normal |
| chr11 | 10000001 | 10100000 | 0.049 | 0.918 | normal |
| chr11 | 10100001 | 10200000 | 0.118 | 0.853 | normal |
| chr11 | 10200001 | 10300000 | 0.048 | 0.989 | normal |
| chr11 | 10300001 | 10400000 | 0.084 | 0.787 | normal |
| chr11 | 10400001 | 10500000 | 0.120 | 1.889 | normal |
| chr11 | 10500001 | 10600000 | 0.087 | 1.173 | normal |
| chr11 | 10600001 | 10700000 | 0.061 | 0.955 | normal |
| chr11 | 10700001 | 10800000 | 0.071 | 1.085 | normal |
| chr11 | 10800001 | 10900000 | 0.104 | 0.900 | normal |
| chr11 | 10900001 | 11000000 | 0.087 | 1.519 | normal |
| chr11 | 11000001 | 11100000 | 0.121 | 1.104 | normal |
| chr11 | 11100001 | 11200000 | 0.081 | 1.783 | normal |
| chr11 | 11200001 | 11300000 | 0.117 | 0.968 | normal |
| chr11 | 11300001 | 11400000 | 0.090 | 1.086 | normal |
| chr11 | 11400001 | 11500000 | 0.093 | 1.162 | normal |

|       |          |          |       |       |        |
|-------|----------|----------|-------|-------|--------|
| chr11 | 11500001 | 11600000 | 0.088 | 0.925 | normal |
| chr11 | 11600001 | 11700000 | 0.072 | 0.954 | normal |
| chr11 | 11700001 | 11800000 | 0.121 | 0.929 | normal |
| chr11 | 11800001 | 11900000 | 0.097 | 1.035 | normal |
| chr11 | 11900001 | 12000000 | 0.089 | 1.003 | normal |
| chr11 | 12000001 | 12100000 | 0.098 | 1.045 | normal |
| chr11 | 12100001 | 12200000 | 0.070 | 0.974 | normal |
| chr11 | 12200001 | 12300000 | 0.103 | 0.903 | normal |
| chr11 | 12300001 | 12400000 | 0.080 | 0.917 | normal |
| chr11 | 12400001 | 12500000 | 0.089 | 0.933 | normal |
| chr11 | 12500001 | 12600000 | 0.100 | 0.864 | normal |
| chr11 | 12600001 | 12700000 | 0.056 | 1.038 | normal |
| chr11 | 12700001 | 12800000 | 0.045 | 0.893 | normal |
| chr11 | 12800001 | 12900000 | 0.076 | 1.127 | normal |
| chr11 | 12900001 | 13000000 | 0.029 | 1.191 | normal |
| chr11 | 13000001 | 13100000 | 0.104 | 1.277 | normal |
| chr11 | 13100001 | 13200000 | 0.117 | 1.319 | normal |
| chr11 | 13200001 | 13300000 | 0.124 | 1.123 | normal |
| chr11 | 13300001 | 13400000 | 0.144 | 0.946 | normal |
| chr11 | 13400001 | 13500000 | 0.116 | 0.909 | normal |
| chr11 | 13500001 | 13600000 | 0.161 | 0.739 | normal |
| chr11 | 13600001 | 13700000 | 0.139 | 0.859 | normal |
| chr11 | 13700001 | 13800000 | 0.118 | 1.011 | normal |
| chr11 | 13800001 | 13900000 | 0.077 | 1.010 | normal |
| chr11 | 13900001 | 14000000 | 0.099 | 1.056 | normal |
| chr11 | 14000001 | 14100000 | 0.083 | 1.010 | normal |
| chr11 | 14100001 | 14200000 | 0.076 | 1.088 | normal |
| chr11 | 14200001 | 14300000 | 0.123 | 0.890 | normal |
| chr11 | 14300001 | 14400000 | 0.108 | 0.920 | normal |
| chr11 | 14400001 | 14500000 | 0.138 | 0.970 | normal |
| chr11 | 14500001 | 14600000 | 0.150 | 1.225 | normal |
| chr11 | 14600001 | 14700000 | 0.229 | 0.878 | normal |
| chr11 | 14700001 | 14800000 | 0.246 | 0.804 | normal |
| chr11 | 14800001 | 14900000 | 0.211 | 0.858 | normal |
| chr11 | 14900001 | 15000000 | 0.237 | 0.790 | normal |
| chr11 | 15000001 | 15100000 | 0.235 | 0.799 | normal |
| chr11 | 15100001 | 15200000 | 0.199 | 0.836 | normal |
| chr11 | 15200001 | 15300000 | 0.076 | 1.120 | normal |
| chr11 | 15300001 | 15400000 | 0.093 | 1.004 | normal |
| chr11 | 15400001 | 15500000 | 0.099 | 0.945 | normal |
| chr11 | 15500001 | 15600000 | 0.168 | 1.297 | normal |
| chr11 | 15600001 | 15700000 | 0.081 | 0.971 | normal |
| chr11 | 15700001 | 15800000 | 0.134 | 0.645 | normal |
| chr11 | 15800001 | 15900000 | 0.103 | 0.916 | normal |

|       |          |          |        |       |        |
|-------|----------|----------|--------|-------|--------|
| chr11 | 15900001 | 16000000 | 0.032  | 1.257 | normal |
| chr11 | 16000001 | 16100000 | 0.020  | 1.079 | normal |
| chr11 | 16100001 | 16200000 | 0.045  | 1.111 | normal |
| chr11 | 16200001 | 16300000 | 0.078  | 0.983 | normal |
| chr11 | 16300001 | 16400000 | 0.100  | 1.278 | normal |
| chr11 | 16400001 | 16500000 | 0.187  | 1.854 | sig    |
| chr11 | 16500001 | 16600000 | 0.167  | 2.202 | sig    |
| chr11 | 16600001 | 16700000 | 0.144  | 0.727 | normal |
| chr11 | 16700001 | 16800000 | -0.003 | 1.017 | normal |
| chr11 | 16800001 | 16900000 | -0.005 | 1.027 | normal |
| chr11 | 16900001 | 17000000 | 0.116  | 0.721 | normal |
| chr11 | 17000001 | 17100000 | 0.111  | 0.970 | normal |
| chr11 | 17100001 | 17200000 | 0.108  | 1.027 | normal |
| chr11 | 17200001 | 17300000 | 0.107  | 1.083 | normal |
| chr11 | 17300001 | 17400000 | 0.115  | 0.985 | normal |
| chr11 | 17400001 | 17500000 | 0.168  | 1.717 | sig    |
| chr11 | 17500001 | 17600000 | 0.129  | 0.886 | normal |
| chr11 | 17600001 | 17700000 | 0.055  | 1.285 | normal |
| chr11 | 17700001 | 17800000 | 0.230  | 1.988 | sig    |
| chr11 | 17800001 | 17900000 | 0.054  | 1.058 | normal |
| chr11 | 17900001 | 18000000 | 0.092  | 0.787 | normal |
| chr11 | 18000001 | 18100000 | 0.102  | 1.001 | normal |
| chr11 | 18100001 | 18200000 | 0.098  | 0.928 | normal |
| chr11 | 18200001 | 18300000 | 0.228  | 0.809 | normal |
| chr11 | 18300001 | 18400000 | 0.211  | 1.110 | normal |
| chr11 | 18400001 | 18500000 | 0.066  | 1.033 | normal |
| chr11 | 18500001 | 18600000 | 0.126  | 1.483 | normal |
| chr11 | 18600001 | 18700000 | 0.092  | 1.092 | normal |
| chr11 | 18700001 | 18800000 | 0.140  | 0.741 | normal |
| chr11 | 18800001 | 18900000 | 0.175  | 0.697 | normal |
| chr11 | 18900001 | 19000000 | 0.071  | 0.921 | normal |
| chr11 | 19000001 | 19100000 | 0.096  | 1.093 | normal |
| chr11 | 19100001 | 19200000 | 0.089  | 0.880 | normal |
| chr11 | 19200001 | 19300000 | 0.148  | 0.637 | normal |
| chr11 | 19300001 | 19400000 | 0.091  | 0.833 | normal |
| chr11 | 19400001 | 19500000 | 0.089  | 0.844 | normal |
| chr11 | 19500001 | 19600000 | 0.127  | 0.644 | normal |
| chr11 | 19600001 | 19700000 | 0.102  | 1.147 | normal |
| chr11 | 19700001 | 19800000 | 0.114  | 0.756 | normal |
| chr11 | 19800001 | 19900000 | 0.127  | 0.668 | normal |
| chr11 | 19900001 | 20000000 | 0.010  | 0.982 | normal |
| chr11 | 20000001 | 20100000 | 0.028  | 1.166 | normal |
| chr11 | 20100001 | 20200000 | 0.047  | 1.110 | normal |
| chr11 | 20200001 | 20300000 | 0.085  | 0.949 | normal |

|       |          |          |       |       |        |
|-------|----------|----------|-------|-------|--------|
| chr11 | 20300001 | 20400000 | 0.162 | 0.931 | normal |
| chr11 | 20400001 | 20500000 | 0.141 | 0.873 | normal |
| chr11 | 20500001 | 20600000 | 0.062 | 1.326 | normal |
| chr11 | 20600001 | 20700000 | 0.021 | 1.172 | normal |
| chr11 | 20700001 | 20800000 | 0.035 | 1.020 | normal |
| chr11 | 20800001 | 20900000 | 0.062 | 0.957 | normal |
| chr11 | 20900001 | 21000000 | 0.088 | 1.267 | normal |
| chr11 | 21000001 | 21100000 | 0.098 | 0.834 | normal |
| chr11 | 21100001 | 21200000 | 0.027 | 1.049 | normal |
| chr11 | 21200001 | 21300000 | 0.009 | 0.997 | normal |
| chr11 | 21300001 | 21400000 | 0.011 | 1.005 | normal |
| chr11 | 21400001 | 21500000 | 0.078 | 1.325 | normal |
| chr11 | 21500001 | 21600000 | 0.082 | 1.174 | normal |
| chr11 | 21600001 | 21700000 | 0.105 | 1.199 | normal |
| chr11 | 21700001 | 21800000 | 0.083 | 1.247 | normal |
| chr11 | 21800001 | 21900000 | 0.104 | 1.099 | normal |
| chr11 | 21900001 | 22000000 | 0.131 | 1.126 | normal |
| chr11 | 22000001 | 22100000 | 0.146 | 1.088 | normal |
| chr11 | 22100001 | 22200000 | 0.151 | 0.830 | normal |
| chr11 | 22200001 | 22300000 | 0.137 | 1.035 | normal |
| chr11 | 22300001 | 22400000 | 0.078 | 1.006 | normal |
| chr11 | 22400001 | 22500000 | 0.100 | 0.919 | normal |
| chr11 | 22500001 | 22600000 | 0.180 | 0.914 | normal |
| chr11 | 22600001 | 22700000 | 0.140 | 1.215 | normal |
| chr11 | 22700001 | 22800000 | 0.137 | 0.814 | normal |
| chr11 | 22800001 | 22900000 | 0.071 | 0.791 | normal |
| chr11 | 22900001 | 23000000 | 0.115 | 0.933 | normal |
| chr11 | 23000001 | 23100000 | 0.120 | 0.992 | normal |
| chr11 | 23100001 | 23200000 | 0.162 | 1.527 | sig    |
| chr11 | 23200001 | 23300000 | 0.204 | 1.767 | sig    |
| chr11 | 23300001 | 23400000 | 0.124 | 0.975 | normal |
| chr11 | 23400001 | 23500000 | 0.162 | 0.829 | normal |
| chr11 | 23500001 | 23600000 | 0.163 | 1.066 | normal |
| chr11 | 23600001 | 23700000 | 0.124 | 0.854 | normal |
| chr11 | 23700001 | 23800000 | 0.128 | 0.996 | normal |
| chr11 | 23800001 | 23900000 | 0.172 | 1.162 | normal |
| chr11 | 23900001 | 24000000 | 0.117 | 1.093 | normal |
| chr11 | 24000001 | 24100000 | 0.194 | 0.878 | normal |
| chr11 | 24100001 | 24200000 | 0.143 | 0.629 | normal |
| chr11 | 24200001 | 24300000 | 0.126 | 0.764 | normal |
| chr11 | 24300001 | 24400000 | 0.061 | 1.213 | normal |
| chr11 | 24400001 | 24500000 | 0.066 | 1.234 | normal |
| chr11 | 24500001 | 24600000 | 0.060 | 0.993 | normal |
| chr11 | 24600001 | 24700000 | 0.070 | 0.908 | normal |

|       |          |          |       |       |        |
|-------|----------|----------|-------|-------|--------|
| chr11 | 24700001 | 24800000 | 0.075 | 0.860 | normal |
| chr11 | 24800001 | 24900000 | 0.083 | 0.859 | normal |
| chr11 | 24900001 | 25000000 | 0.077 | 0.937 | normal |
| chr11 | 25000001 | 25100000 | 0.120 | 0.993 | normal |
| chr11 | 25100001 | 25200000 | 0.070 | 0.926 | normal |
| chr11 | 25200001 | 25300000 | 0.149 | 0.693 | normal |
| chr11 | 25300001 | 25400000 | 0.182 | 0.608 | normal |
| chr11 | 25400001 | 25500000 | 0.225 | 0.479 | normal |
| chr11 | 25500001 | 25600000 | 0.089 | 0.773 | normal |
| chr11 | 25600001 | 25700000 | 0.050 | 1.062 | normal |
| chr11 | 25700001 | 25800000 | 0.084 | 0.915 | normal |
| chr11 | 25800001 | 25900000 | 0.103 | 1.025 | normal |
| chr11 | 25900001 | 26000000 | 0.135 | 0.833 | normal |
| chr11 | 26000001 | 26100000 | 0.152 | 0.854 | normal |
| chr11 | 26100001 | 26200000 | 0.137 | 0.796 | normal |
| chr11 | 26200001 | 26300000 | 0.070 | 0.983 | normal |
| chr11 | 26300001 | 26400000 | 0.071 | 1.032 | normal |
| chr11 | 26400001 | 26500000 | 0.079 | 0.883 | normal |
| chr11 | 26500001 | 26600000 | 0.197 | 1.026 | normal |
| chr11 | 26600001 | 26700000 | 0.105 | 0.973 | normal |
| chr11 | 26700001 | 26800000 | 0.093 | 0.916 | normal |
| chr11 | 26800001 | 26900000 | 0.100 | 1.003 | normal |
| chr11 | 26900001 | 27000000 | 0.090 | 1.146 | normal |
| chr11 | 27000001 | 27100000 | 0.072 | 1.432 | normal |
| chr11 | 27100001 | 27200000 | 0.044 | 1.099 | normal |
| chr11 | 27200001 | 27300000 | 0.081 | 1.181 | normal |
| chr11 | 27300001 | 27400000 | 0.123 | 1.098 | normal |
| chr11 | 27400001 | 27500000 | 0.093 | 1.064 | normal |
| chr11 | 27500001 | 27600000 | 0.105 | 1.021 | normal |
| chr11 | 27600001 | 27700000 | 0.101 | 1.161 | normal |
| chr11 | 27700001 | 27800000 | 0.193 | 0.865 | normal |
| chr11 | 27800001 | 27900000 | 0.056 | 0.930 | normal |
| chr11 | 27900001 | 28000000 | 0.154 | 0.624 | normal |
| chr11 | 28000001 | 28100000 | 0.227 | 0.542 | normal |
| chr11 | 28100001 | 28200000 | 0.135 | 0.959 | normal |
| chr11 | 28200001 | 28300000 | 0.160 | 1.013 | normal |
| chr11 | 28300001 | 28400000 | 0.059 | 0.828 | normal |
| chr11 | 28400001 | 28500000 | 0.174 | 1.844 | sig    |
| chr11 | 28500001 | 28600000 | 0.160 | 1.765 | sig    |
| chr11 | 28600001 | 28700000 | 0.101 | 0.927 | normal |
| chr11 | 28700001 | 28800000 | 0.115 | 0.810 | normal |
| chr11 | 28800001 | 28900000 | 0.134 | 0.932 | normal |
| chr11 | 28900001 | 29000000 | 0.126 | 1.412 | normal |
| chr11 | 29000001 | 29100000 | 0.173 | 1.039 | normal |



|       |          |          |       |       |        |
|-------|----------|----------|-------|-------|--------|
| chr11 | 29100001 | 29200000 | 0.116 | 1.259 | normal |
| chr11 | 29200001 | 29300000 | 0.029 | 0.922 | normal |
| chr11 | 29300001 | 29400000 | 0.100 | 0.928 | normal |
| chr11 | 29400001 | 29500000 | 0.111 | 1.331 | normal |
| chr11 | 29500001 | 29600000 | 0.107 | 1.732 | normal |
| chr11 | 29600001 | 29700000 | 0.120 | 0.529 | normal |
| chr11 | 29700001 | 29800000 | 0.090 | 0.825 | normal |
| chr11 | 29800001 | 29900000 | 0.059 | 0.935 | normal |
| chr11 | 29900001 | 30000000 | 0.113 | 0.989 | normal |
| chr11 | 30000001 | 30100000 | 0.120 | 1.381 | normal |
| chr11 | 30100001 | 30200000 | 0.117 | 0.933 | normal |
| chr11 | 30200001 | 30300000 | 0.089 | 0.884 | normal |
| chr11 | 30300001 | 30400000 | 0.155 | 1.723 | sig    |
| chr11 | 30400001 | 30500000 | 0.072 | 1.136 | normal |
| chr11 | 30500001 | 30600000 | 0.090 | 0.908 | normal |
| chr11 | 30600001 | 30700000 | 0.021 | 0.855 | normal |
| chr11 | 30700001 | 30800000 | 0.058 | 0.885 | normal |
| chr11 | 30800001 | 30900000 | 0.072 | 1.174 | normal |
| chr11 | 30900001 | 31000000 | 0.078 | 0.989 | normal |
| chr11 | 31000001 | 31100000 | 0.317 | 0.902 | normal |
| chr11 | 31100001 | 31200000 | 0.169 | 0.944 | normal |
| chr11 | 31200001 | 31300000 | 0.104 | 1.111 | normal |
| chr11 | 31300001 | 31400000 | 0.060 | 1.188 | normal |
| chr11 | 31400001 | 31500000 | 0.042 | 1.205 | normal |
| chr11 | 31500001 | 31600000 | 0.121 | 0.707 | normal |
| chr11 | 31600001 | 31700000 | 0.239 | 0.927 | normal |
| chr11 | 31700001 | 31800000 | 0.252 | 1.123 | normal |
| chr11 | 31800001 | 31900000 | 0.145 | 0.832 | normal |
| chr11 | 31900001 | 32000000 | 0.155 | 1.096 | normal |
| chr11 | 32000001 | 32100000 | 0.138 | 0.925 | normal |
| chr11 | 32100001 | 32200000 | 0.142 | 1.081 | normal |
| chr11 | 32200001 | 32300000 | 0.054 | 1.047 | normal |
| chr11 | 32300001 | 32400000 | 0.121 | 0.776 | normal |
| chr11 | 32400001 | 32500000 | 0.115 | 0.764 | normal |
| chr11 | 32500001 | 32600000 | 0.121 | 0.834 | normal |
| chr11 | 32600001 | 32700000 | 0.078 | 0.942 | normal |
| chr11 | 32700001 | 32800000 | 0.121 | 0.819 | normal |
| chr11 | 32800001 | 32900000 | 0.071 | 1.128 | normal |
| chr11 | 32900001 | 33000000 | 0.108 | 1.097 | normal |
| chr11 | 33000001 | 33100000 | 0.097 | 0.895 | normal |
| chr11 | 33100001 | 33200000 | 0.083 | 0.740 | normal |
| chr11 | 33200001 | 33300000 | 0.129 | 0.663 | normal |
| chr11 | 33300001 | 33400000 | 0.148 | 0.784 | normal |
| chr11 | 33400001 | 33500000 | 0.067 | 0.779 | normal |

|       |          |          |       |       |        |
|-------|----------|----------|-------|-------|--------|
| chr11 | 33500001 | 33600000 | 0.120 | 1.056 | normal |
| chr11 | 33600001 | 33700000 | 0.098 | 0.980 | normal |
| chr11 | 33700001 | 33800000 | 0.124 | 0.698 | normal |
| chr11 | 33800001 | 33900000 | 0.101 | 1.008 | normal |
| chr11 | 33900001 | 34000000 | 0.175 | 0.642 | normal |
| chr11 | 34000001 | 34100000 | 0.092 | 0.803 | normal |
| chr11 | 34100001 | 34200000 | 0.050 | 0.947 | normal |
| chr11 | 34200001 | 34300000 | 0.085 | 0.842 | normal |
| chr11 | 34300001 | 34400000 | 0.045 | 1.118 | normal |
| chr11 | 34400001 | 34500000 | 0.050 | 0.955 | normal |
| chr11 | 34500001 | 34600000 | 0.079 | 0.954 | normal |
| chr11 | 34600001 | 34700000 | 0.080 | 0.846 | normal |
| chr11 | 34700001 | 34800000 | 0.074 | 1.019 | normal |
| chr11 | 34800001 | 34900000 | 0.065 | 0.949 | normal |
| chr11 | 34900001 | 35000000 | 0.053 | 1.193 | normal |
| chr11 | 35000001 | 35100000 | 0.096 | 0.489 | normal |
| chr11 | 35100001 | 35200000 | 0.059 | 0.979 | normal |
| chr11 | 35200001 | 35300000 | 0.056 | 0.941 | normal |
| chr11 | 35300001 | 35400000 | 0.099 | 0.828 | normal |
| chr11 | 35400001 | 35500000 | 0.082 | 0.738 | normal |
| chr11 | 35500001 | 35600000 | 0.081 | 0.977 | normal |
| chr11 | 35600001 | 35700000 | 0.105 | 0.916 | normal |
| chr11 | 35700001 | 35800000 | 0.022 | 0.856 | normal |
| chr11 | 35800001 | 35900000 | 0.092 | 0.693 | normal |
| chr11 | 35900001 | 36000000 | 0.103 | 0.846 | normal |
| chr11 | 36000001 | 36100000 | 0.088 | 0.979 | normal |
| chr11 | 36100001 | 36200000 | 0.102 | 1.099 | normal |
| chr11 | 36200001 | 36300000 | 0.082 | 0.966 | normal |
| chr11 | 36300001 | 36400000 | 0.036 | 0.905 | normal |
| chr11 | 36400001 | 36500000 | 0.068 | 0.729 | normal |
| chr11 | 36500001 | 36600000 | 0.090 | 0.830 | normal |
| chr11 | 36600001 | 36700000 | 0.129 | 0.739 | normal |
| chr11 | 36700001 | 36800000 | 0.124 | 0.797 | normal |
| chr11 | 36800001 | 36900000 | 0.141 | 0.508 | normal |
| chr11 | 36900001 | 37000000 | 0.105 | 0.928 | normal |
| chr11 | 37000001 | 37100000 | 0.098 | 0.698 | normal |
| chr11 | 37100001 | 37200000 | 0.074 | 0.870 | normal |
| chr11 | 37200001 | 37300000 | 0.079 | 0.856 | normal |
| chr11 | 37300001 | 37400000 | 0.042 | 1.058 | normal |
| chr11 | 37400001 | 37500000 | 0.060 | 1.090 | normal |
| chr11 | 37500001 | 37600000 | 0.088 | 0.847 | normal |
| chr11 | 37600001 | 37700000 | 0.124 | 0.979 | normal |
| chr11 | 37700001 | 37800000 | 0.080 | 1.582 | normal |
| chr11 | 37800001 | 37900000 | 0.072 | 1.175 | normal |

|       |          |          |       |       |        |
|-------|----------|----------|-------|-------|--------|
| chr11 | 37900001 | 38000000 | 0.087 | 1.015 | normal |
| chr11 | 38000001 | 38100000 | 0.096 | 1.049 | normal |
| chr11 | 38100001 | 38200000 | 0.123 | 0.909 | normal |
| chr11 | 38200001 | 38300000 | 0.160 | 0.617 | normal |
| chr11 | 38300001 | 38400000 | 0.255 | 0.448 | normal |
| chr11 | 38400001 | 38500000 | 0.054 | 1.153 | normal |
| chr11 | 38500001 | 38600000 | 0.082 | 1.425 | normal |
| chr11 | 38600001 | 38700000 | 0.046 | 0.954 | normal |
| chr11 | 38700001 | 38800000 | 0.055 | 1.051 | normal |
| chr11 | 38800001 | 38900000 | 0.093 | 0.773 | normal |
| chr11 | 38900001 | 39000000 | 0.069 | 1.197 | normal |
| chr11 | 39000001 | 39100000 | 0.216 | 0.627 | normal |
| chr11 | 39100001 | 39200000 | 0.190 | 0.647 | normal |
| chr11 | 39200001 | 39300000 | 0.142 | 0.735 | normal |
| chr11 | 39300001 | 39400000 | 0.115 | 1.089 | normal |
| chr11 | 39400001 | 39500000 | 0.039 | 0.715 | normal |
| chr11 | 39500001 | 39600000 | 0.044 | 1.052 | normal |
| chr11 | 39600001 | 39700000 | 0.180 | 1.322 | normal |
| chr11 | 39700001 | 39800000 | 0.265 | 1.488 | normal |
| chr11 | 39800001 | 39900000 | 0.273 | 1.483 | normal |
| chr11 | 39900001 | 40000000 | 0.179 | 1.220 | normal |
| chr11 | 40000001 | 40100000 | 0.095 | 1.130 | normal |
| chr11 | 40100001 | 40200000 | 0.076 | 1.112 | normal |
| chr11 | 40200001 | 40300000 | 0.099 | 0.869 | normal |
| chr11 | 40300001 | 40400000 | 0.135 | 0.723 | normal |
| chr11 | 40400001 | 40500000 | 0.120 | 0.872 | normal |
| chr11 | 40500001 | 40600000 | 0.046 | 0.980 | normal |
| chr11 | 40600001 | 40700000 | 0.097 | 1.046 | normal |
| chr11 | 40700001 | 40800000 | 0.137 | 0.793 | normal |
| chr11 | 40800001 | 40900000 | 0.165 | 0.751 | normal |
| chr11 | 40900001 | 41000000 | 0.094 | 1.032 | normal |
| chr11 | 41000001 | 41100000 | 0.142 | 0.913 | normal |
| chr11 | 41100001 | 41200000 | 0.081 | 0.866 | normal |
| chr11 | 41200001 | 41300000 | 0.077 | 0.915 | normal |
| chr11 | 41300001 | 41400000 | 0.134 | 1.025 | normal |
| chr11 | 41400001 | 41500000 | 0.208 | 0.724 | normal |
| chr11 | 41500001 | 41600000 | 0.082 | 1.054 | normal |
| chr11 | 41600001 | 41700000 | 0.084 | 0.933 | normal |
| chr11 | 41700001 | 41800000 | 0.051 | 0.897 | normal |
| chr11 | 41800001 | 41900000 | 0.073 | 0.840 | normal |
| chr11 | 41900001 | 42000000 | 0.126 | 0.785 | normal |
| chr11 | 42000001 | 42100000 | 0.058 | 1.007 | normal |
| chr11 | 42100001 | 42200000 | 0.039 | 1.061 | normal |
| chr11 | 42200001 | 42300000 | 0.145 | 0.970 | normal |

|       |          |          |       |       |        |
|-------|----------|----------|-------|-------|--------|
| chr11 | 42300001 | 42400000 | 0.062 | 1.323 | normal |
| chr11 | 42400001 | 42500000 | 0.129 | 1.629 | normal |
| chr11 | 42500001 | 42600000 | 0.116 | 0.937 | normal |
| chr11 | 42600001 | 42700000 | 0.215 | 0.423 | normal |
| chr11 | 42700001 | 42800000 | 0.192 | 0.694 | normal |
| chr11 | 42800001 | 42900000 | 0.125 | 1.108 | normal |
| chr11 | 42900001 | 43000000 | 0.144 | 1.338 | normal |
| chr11 | 43000001 | 43100000 | 0.080 | 0.941 | normal |
| chr11 | 43100001 | 43200000 | 0.156 | 0.933 | normal |
| chr11 | 43200001 | 43300000 | 0.111 | 1.258 | normal |
| chr11 | 43300001 | 43400000 | 0.113 | 1.397 | normal |
| chr11 | 43400001 | 43500000 | 0.094 | 1.136 | normal |
| chr11 | 43500001 | 43600000 | 0.100 | 1.436 | normal |
| chr11 | 43600001 | 43700000 | 0.229 | 0.648 | normal |
| chr11 | 43700001 | 43800000 | 0.312 | 0.309 | normal |
| chr11 | 43800001 | 43900000 | 0.147 | 0.898 | normal |
| chr11 | 43900001 | 44000000 | 0.145 | 0.867 | normal |
| chr11 | 44000001 | 44100000 | 0.104 | 0.838 | normal |
| chr11 | 44100001 | 44200000 | 0.110 | 1.217 | normal |
| chr11 | 44200001 | 44300000 | 0.132 | 0.971 | normal |
| chr11 | 44300001 | 44400000 | 0.219 | 1.136 | normal |
| chr11 | 44400001 | 44500000 | 0.082 | 1.139 | normal |
| chr11 | 44500001 | 44600000 | 0.099 | 0.868 | normal |
| chr11 | 44600001 | 44700000 | 0.043 | 1.085 | normal |
| chr11 | 44700001 | 44800000 | 0.097 | 1.139 | normal |
| chr11 | 44800001 | 44900000 | 0.163 | 0.770 | normal |
| chr11 | 44900001 | 45000000 | 0.099 | 1.584 | normal |
| chr11 | 45000001 | 45100000 | 0.149 | 1.037 | normal |
| chr11 | 45100001 | 45200000 | 0.168 | 1.119 | normal |
| chr11 | 45200001 | 45300000 | 0.096 | 1.120 | normal |
| chr11 | 45300001 | 45400000 | 0.083 | 0.995 | normal |
| chr11 | 45400001 | 45500000 | 0.075 | 1.209 | normal |
| chr11 | 45500001 | 45600000 | 0.080 | 1.570 | normal |
| chr11 | 45600001 | 45700000 | 0.079 | 0.970 | normal |
| chr11 | 45700001 | 45800000 | 0.074 | 1.017 | normal |
| chr11 | 45800001 | 45900000 | 0.144 | 1.318 | normal |
| chr11 | 45900001 | 46000000 | 0.153 | 0.900 | normal |
| chr12 | 1        | 100000   | 0.017 | 1.160 | normal |
| chr12 | 100001   | 200000   | 0.038 | 0.944 | normal |
| chr12 | 200001   | 300000   | 0.100 | 0.830 | normal |
| chr12 | 300001   | 400000   | 0.085 | 0.866 | normal |
| chr12 | 400001   | 500000   | 0.098 | 0.581 | normal |
| chr12 | 500001   | 600000   | 0.095 | 1.024 | normal |
| chr12 | 600001   | 700000   | 0.131 | 0.803 | normal |

|       |         |         |       |       |        |
|-------|---------|---------|-------|-------|--------|
| chr12 | 700001  | 800000  | 0.173 | 0.633 | normal |
| chr12 | 800001  | 900000  | 0.108 | 0.687 | normal |
| chr12 | 900001  | 1000000 | 0.125 | 1.119 | normal |
| chr12 | 1000001 | 1100000 | 0.083 | 0.896 | normal |
| chr12 | 1100001 | 1200000 | 0.141 | 1.038 | normal |
| chr12 | 1200001 | 1300000 | 0.059 | 0.831 | normal |
| chr12 | 1300001 | 1400000 | 0.089 | 0.841 | normal |
| chr12 | 1400001 | 1500000 | 0.058 | 1.018 | normal |
| chr12 | 1500001 | 1600000 | 0.089 | 1.454 | normal |
| chr12 | 1600001 | 1700000 | 0.126 | 0.841 | normal |
| chr12 | 1700001 | 1800000 | 0.195 | 2.619 | sig    |
| chr12 | 1800001 | 1900000 | 0.079 | 3.351 | normal |
| chr12 | 1900001 | 2000000 | 0.086 | 2.490 | normal |
| chr12 | 2000001 | 2100000 | 0.076 | 0.801 | normal |
| chr12 | 2100001 | 2200000 | 0.139 | 0.744 | normal |
| chr12 | 2200001 | 2300000 | 0.118 | 1.210 | normal |
| chr12 | 2300001 | 2400000 | 0.122 | 1.378 | normal |
| chr12 | 2400001 | 2500000 | 0.100 | 0.911 | normal |
| chr12 | 2500001 | 2600000 | 0.089 | 1.901 | normal |
| chr12 | 2600001 | 2700000 | 0.069 | 0.924 | normal |
| chr12 | 2700001 | 2800000 | 0.079 | 1.035 | normal |
| chr12 | 2800001 | 2900000 | 0.110 | 1.407 | normal |
| chr12 | 2900001 | 3000000 | 0.113 | 0.808 | normal |
| chr12 | 3000001 | 3100000 | 0.104 | 1.054 | normal |
| chr12 | 3100001 | 3200000 | 0.101 | 1.191 | normal |
| chr12 | 3200001 | 3300000 | 0.070 | 1.144 | normal |
| chr12 | 3300001 | 3400000 | 0.043 | 0.988 | normal |
| chr12 | 3400001 | 3500000 | 0.029 | 0.929 | normal |
| chr12 | 3500001 | 3600000 | 0.057 | 0.968 | normal |
| chr12 | 3600001 | 3700000 | 0.049 | 0.971 | normal |
| chr12 | 3700001 | 3800000 | 0.063 | 1.045 | normal |
| chr12 | 3800001 | 3900000 | 0.068 | 0.941 | normal |
| chr12 | 3900001 | 4000000 | 0.113 | 0.796 | normal |
| chr12 | 4000001 | 4100000 | 0.112 | 0.991 | normal |
| chr12 | 4100001 | 4200000 | 0.083 | 1.098 | normal |
| chr12 | 4200001 | 4300000 | 0.082 | 1.057 | normal |
| chr12 | 4300001 | 4400000 | 0.135 | 0.904 | normal |
| chr12 | 4400001 | 4500000 | 0.111 | 1.011 | normal |
| chr12 | 4500001 | 4600000 | 0.139 | 1.276 | normal |
| chr12 | 4600001 | 4700000 | 0.107 | 1.320 | normal |
| chr12 | 4700001 | 4800000 | 0.048 | 1.476 | normal |
| chr12 | 4800001 | 4900000 | 0.081 | 0.875 | normal |
| chr12 | 4900001 | 5000000 | 0.145 | 0.896 | normal |
| chr12 | 5000001 | 5100000 | 0.126 | 0.901 | normal |

|       |         |         |       |       |        |
|-------|---------|---------|-------|-------|--------|
| chr12 | 5100001 | 5200000 | 0.133 | 1.053 | normal |
| chr12 | 5200001 | 5300000 | 0.057 | 1.331 | normal |
| chr12 | 5300001 | 5400000 | 0.041 | 1.244 | normal |
| chr12 | 5400001 | 5500000 | 0.047 | 0.888 | normal |
| chr12 | 5500001 | 5600000 | 0.044 | 0.850 | normal |
| chr12 | 5600001 | 5700000 | 0.039 | 1.080 | normal |
| chr12 | 5700001 | 5800000 | 0.046 | 0.820 | normal |
| chr12 | 5800001 | 5900000 | 0.021 | 0.829 | normal |
| chr12 | 5900001 | 6000000 | 0.036 | 0.798 | normal |
| chr12 | 6000001 | 6100000 | 0.037 | 0.682 | normal |
| chr12 | 6100001 | 6200000 | 0.026 | 1.166 | normal |
| chr12 | 6200001 | 6300000 | 0.038 | 0.889 | normal |
| chr12 | 6300001 | 6400000 | 0.042 | 0.953 | normal |
| chr12 | 6400001 | 6500000 | 0.041 | 1.010 | normal |
| chr12 | 6500001 | 6600000 | 0.048 | 0.921 | normal |
| chr12 | 6600001 | 6700000 | 0.035 | 1.099 | normal |
| chr12 | 6700001 | 6800000 | 0.044 | 1.019 | normal |
| chr12 | 6800001 | 6900000 | 0.057 | 0.988 | normal |
| chr12 | 6900001 | 7000000 | 0.049 | 1.220 | normal |
| chr12 | 7000001 | 7100000 | 0.022 | 1.219 | normal |
| chr12 | 7100001 | 7200000 | 0.032 | 1.075 | normal |
| chr12 | 7200001 | 7300000 | 0.011 | 0.972 | normal |
| chr12 | 7300001 | 7400000 | 0.023 | 0.972 | normal |
| chr12 | 7400001 | 7500000 | 0.040 | 0.817 | normal |
| chr12 | 7500001 | 7600000 | 0.032 | 1.097 | normal |
| chr12 | 7600001 | 7700000 | 0.039 | 0.725 | normal |
| chr12 | 7700001 | 7800000 | 0.025 | 1.047 | normal |
| chr12 | 7800001 | 7900000 | 0.042 | 1.308 | normal |
| chr12 | 7900001 | 8000000 | 0.029 | 1.427 | normal |
| chr12 | 8000001 | 8100000 | 0.043 | 1.001 | normal |
| chr12 | 8100001 | 8200000 | 0.042 | 1.237 | normal |
| chr12 | 8200001 | 8300000 | 0.068 | 1.451 | normal |
| chr12 | 8300001 | 8400000 | 0.048 | 1.082 | normal |
| chr12 | 8400001 | 8500000 | 0.062 | 0.938 | normal |
| chr12 | 8500001 | 8600000 | 0.005 | 0.996 | normal |
| chr12 | 8600001 | 8700000 | 0.039 | 1.093 | normal |
| chr12 | 8700001 | 8800000 | 0.048 | 1.065 | normal |
| chr12 | 8800001 | 8900000 | 0.010 | 1.026 | normal |
| chr12 | 8900001 | 9000000 | 0.019 | 0.985 | normal |
| chr12 | 9000001 | 9100000 | 0.079 | 0.986 | normal |
| chr12 | 9100001 | 9200000 | 0.090 | 1.245 | normal |
| chr12 | 9200001 | 9300000 | 0.065 | 1.759 | normal |
| chr12 | 9300001 | 9400000 | 0.087 | 0.931 | normal |
| chr12 | 9400001 | 9500000 | 0.135 | 0.815 | normal |

|       |          |          |       |       |        |
|-------|----------|----------|-------|-------|--------|
| chr12 | 9500001  | 9600000  | 0.121 | 1.028 | normal |
| chr12 | 9600001  | 9700000  | 0.083 | 1.399 | normal |
| chr12 | 9700001  | 9800000  | 0.104 | 2.057 | normal |
| chr12 | 9800001  | 9900000  | 0.079 | 0.927 | normal |
| chr12 | 9900001  | 10000000 | 0.047 | 1.042 | normal |
| chr12 | 10000001 | 10100000 | 0.050 | 1.051 | normal |
| chr12 | 10100001 | 10200000 | 0.087 | 0.963 | normal |
| chr12 | 10200001 | 10300000 | 0.164 | 1.554 | sig    |
| chr12 | 10300001 | 10400000 | 0.031 | 0.886 | normal |
| chr12 | 10400001 | 10500000 | 0.089 | 0.713 | normal |
| chr12 | 10500001 | 10600000 | 0.094 | 1.033 | normal |
| chr12 | 10600001 | 10700000 | 0.025 | 1.029 | normal |
| chr12 | 10700001 | 10800000 | 0.041 | 1.100 | normal |
| chr12 | 10800001 | 10900000 | 0.032 | 1.249 | normal |
| chr12 | 10900001 | 11000000 | 0.041 | 1.287 | normal |
| chr12 | 11000001 | 11100000 | 0.046 | 1.646 | normal |
| chr12 | 11100001 | 11200000 | 0.060 | 1.266 | normal |
| chr12 | 11200001 | 11300000 | 0.131 | 0.737 | normal |
| chr12 | 11300001 | 11400000 | 0.043 | 0.998 | normal |
| chr12 | 11400001 | 11500000 | 0.040 | 1.221 | normal |
| chr12 | 11500001 | 11600000 | 0.053 | 1.064 | normal |
| chr12 | 11600001 | 11700000 | 0.021 | 1.106 | normal |
| chr12 | 11700001 | 11800000 | 0.082 | 1.038 | normal |
| chr12 | 11800001 | 11900000 | 0.060 | 1.112 | normal |
| chr12 | 11900001 | 12000000 | 0.063 | 0.725 | normal |
| chr12 | 12000001 | 12100000 | 0.080 | 0.948 | normal |
| chr12 | 12100001 | 12200000 | 0.036 | 1.000 | normal |
| chr12 | 12200001 | 12300000 | 0.087 | 1.160 | normal |
| chr12 | 12300001 | 12400000 | 0.076 | 1.100 | normal |
| chr12 | 12400001 | 12500000 | 0.075 | 1.112 | normal |
| chr12 | 12500001 | 12600000 | 0.099 | 1.353 | normal |
| chr12 | 12600001 | 12700000 | 0.066 | 1.161 | normal |
| chr12 | 12700001 | 12800000 | 0.099 | 1.137 | normal |
| chr12 | 12800001 | 12900000 | 0.141 | 1.753 | normal |
| chr12 | 12900001 | 13000000 | 0.107 | 1.283 | normal |
| chr12 | 13000001 | 13100000 | 0.081 | 1.223 | normal |
| chr12 | 13100001 | 13200000 | 0.105 | 1.098 | normal |
| chr12 | 13200001 | 13300000 | 0.068 | 1.043 | normal |
| chr12 | 13300001 | 13400000 | 0.059 | 0.954 | normal |
| chr12 | 13400001 | 13500000 | 0.090 | 1.007 | normal |
| chr12 | 13500001 | 13600000 | 0.070 | 1.093 | normal |
| chr12 | 13600001 | 13700000 | 0.049 | 0.961 | normal |
| chr12 | 13700001 | 13800000 | 0.066 | 1.141 | normal |
| chr12 | 13800001 | 13900000 | 0.091 | 1.113 | normal |

|       |          |          |       |       |        |
|-------|----------|----------|-------|-------|--------|
| chr12 | 13900001 | 14000000 | 0.102 | 1.323 | normal |
| chr12 | 14000001 | 14100000 | 0.057 | 1.365 | normal |
| chr12 | 14100001 | 14200000 | 0.123 | 0.981 | normal |
| chr12 | 14200001 | 14300000 | 0.083 | 1.371 | normal |
| chr12 | 14300001 | 14400000 | 0.054 | 1.451 | normal |
| chr12 | 14400001 | 14500000 | 0.040 | 1.358 | normal |
| chr12 | 14500001 | 14600000 | 0.033 | 1.319 | normal |
| chr12 | 14600001 | 14700000 | 0.057 | 1.294 | normal |
| chr12 | 14700001 | 14800000 | 0.078 | 1.144 | normal |
| chr12 | 14800001 | 14900000 | 0.081 | 1.154 | normal |
| chr12 | 14900001 | 15000000 | 0.084 | 1.236 | normal |
| chr12 | 15000001 | 15100000 | 0.088 | 1.036 | normal |
| chr12 | 15100001 | 15200000 | 0.102 | 1.304 | normal |
| chr12 | 15200001 | 15300000 | 0.154 | 1.251 | normal |
| chr12 | 15300001 | 15400000 | 0.128 | 0.877 | normal |
| chr12 | 15400001 | 15500000 | 0.101 | 1.017 | normal |
| chr12 | 15500001 | 15600000 | 0.075 | 1.117 | normal |
| chr12 | 15600001 | 15700000 | 0.061 | 1.093 | normal |
| chr12 | 15700001 | 15800000 | 0.066 | 1.029 | normal |
| chr12 | 15800001 | 15900000 | 0.045 | 1.030 | normal |
| chr12 | 15900001 | 16000000 | 0.047 | 0.957 | normal |
| chr12 | 16000001 | 16100000 | 0.115 | 1.268 | normal |
| chr12 | 16100001 | 16200000 | 0.085 | 1.658 | normal |
| chr12 | 16200001 | 16300000 | 0.089 | 1.083 | normal |
| chr12 | 16300001 | 16400000 | 0.060 | 0.987 | normal |
| chr12 | 16400001 | 16500000 | 0.046 | 1.003 | normal |
| chr12 | 16500001 | 16600000 | 0.061 | 0.948 | normal |
| chr12 | 16600001 | 16700000 | 0.048 | 1.410 | normal |
| chr12 | 16700001 | 16800000 | 0.064 | 1.607 | normal |
| chr12 | 16800001 | 16900000 | 0.083 | 1.142 | normal |
| chr12 | 16900001 | 17000000 | 0.165 | 0.518 | normal |
| chr12 | 17000001 | 17100000 | 0.060 | 0.951 | normal |
| chr12 | 17100001 | 17200000 | 0.042 | 1.024 | normal |
| chr12 | 17200001 | 17300000 | 0.048 | 1.090 | normal |
| chr12 | 17300001 | 17400000 | 0.063 | 1.187 | normal |
| chr12 | 17400001 | 17500000 | 0.058 | 1.042 | normal |
| chr12 | 17500001 | 17600000 | 0.084 | 1.351 | normal |
| chr12 | 17600001 | 17700000 | 0.113 | 2.471 | normal |
| chr12 | 17700001 | 17800000 | 0.137 | 2.138 | normal |
| chr12 | 17800001 | 17900000 | 0.065 | 1.118 | normal |
| chr12 | 17900001 | 18000000 | 0.048 | 1.490 | normal |
| chr12 | 18000001 | 18100000 | 0.039 | 1.308 | normal |
| chr12 | 18100001 | 18200000 | 0.038 | 1.037 | normal |
| chr12 | 18200001 | 18300000 | 0.063 | 1.165 | normal |



|       |          |          |       |       |        |
|-------|----------|----------|-------|-------|--------|
| chr12 | 18300001 | 18400000 | 0.016 | 1.043 | normal |
| chr12 | 18400001 | 18500000 | 0.061 | 1.205 | normal |
| chr12 | 18500001 | 18600000 | 0.084 | 1.326 | normal |
| chr12 | 18600001 | 18700000 | 0.126 | 0.870 | normal |
| chr12 | 18700001 | 18800000 | 0.056 | 1.124 | normal |
| chr12 | 18800001 | 18900000 | 0.057 | 1.362 | normal |
| chr12 | 18900001 | 19000000 | 0.045 | 2.284 | normal |
| chr12 | 19000001 | 19100000 | 0.048 | 1.131 | normal |
| chr12 | 19100001 | 19200000 | 0.025 | 0.975 | normal |
| chr12 | 19200001 | 19300000 | 0.040 | 1.056 | normal |
| chr12 | 19300001 | 19400000 | 0.060 | 1.033 | normal |
| chr12 | 19400001 | 19500000 | 0.048 | 1.006 | normal |
| chr12 | 19500001 | 19600000 | 0.084 | 1.004 | normal |
| chr12 | 19600001 | 19700000 | 0.149 | 1.270 | normal |
| chr12 | 19700001 | 19800000 | 0.081 | 0.881 | normal |
| chr12 | 19800001 | 19900000 | 0.044 | 0.690 | normal |
| chr12 | 19900001 | 20000000 | 0.172 | 1.126 | normal |
| chr12 | 20000001 | 20100000 | 0.137 | 1.274 | normal |
| chr12 | 20100001 | 20200000 | 0.068 | 1.033 | normal |
| chr12 | 20200001 | 20300000 | 0.106 | 0.977 | normal |
| chr12 | 20300001 | 20400000 | 0.104 | 1.007 | normal |
| chr12 | 20400001 | 20500000 | 0.044 | 1.187 | normal |
| chr12 | 20500001 | 20600000 | 0.015 | 1.042 | normal |
| chr12 | 20600001 | 20700000 | 0.015 | 0.963 | normal |
| chr12 | 20700001 | 20800000 | 0.020 | 1.099 | normal |
| chr12 | 20800001 | 20900000 | 0.073 | 1.840 | normal |
| chr12 | 20900001 | 21000000 | 0.043 | 1.315 | normal |
| chr12 | 21000001 | 21100000 | 0.031 | 1.041 | normal |
| chr12 | 21100001 | 21200000 | 0.089 | 1.444 | normal |
| chr12 | 21200001 | 21300000 | 0.039 | 1.146 | normal |
| chr12 | 21300001 | 21400000 | 0.072 | 1.855 | normal |
| chr12 | 21400001 | 21500000 | 0.088 | 2.160 | normal |
| chr12 | 21500001 | 21600000 | 0.031 | 0.903 | normal |
| chr12 | 21600001 | 21700000 | 0.015 | 0.715 | normal |
| chr12 | 21700001 | 21800000 | 0.019 | 0.789 | normal |
| chr12 | 21800001 | 21900000 | 0.031 | 0.846 | normal |
| chr12 | 21900001 | 22000000 | 0.058 | 0.974 | normal |
| chr12 | 22000001 | 22100000 | 0.035 | 1.391 | normal |
| chr12 | 22100001 | 22200000 | 0.009 | 1.203 | normal |
| chr12 | 22200001 | 22300000 | 0.015 | 1.082 | normal |
| chr12 | 22300001 | 22400000 | 0.058 | 1.037 | normal |
| chr12 | 22400001 | 22500000 | 0.101 | 0.976 | normal |
| chr12 | 22500001 | 22600000 | 0.107 | 1.118 | normal |
| chr12 | 22600001 | 22700000 | 0.154 | 1.393 | normal |

|       |          |          |       |       |        |
|-------|----------|----------|-------|-------|--------|
| chr12 | 22700001 | 22800000 | 0.031 | 1.130 | normal |
| chr12 | 22800001 | 22900000 | 0.112 | 1.088 | normal |
| chr12 | 22900001 | 23000000 | 0.110 | 0.913 | normal |
| chr12 | 23000001 | 23100000 | 0.026 | 0.929 | normal |
| chr12 | 23100001 | 23200000 | 0.020 | 0.883 | normal |
| chr12 | 23200001 | 23300000 | 0.043 | 0.956 | normal |
| chr12 | 23300001 | 23400000 | 0.049 | 0.916 | normal |
| chr12 | 23400001 | 23500000 | 0.091 | 0.970 | normal |
| chr12 | 23500001 | 23600000 | 0.198 | 0.871 | normal |
| chr12 | 23600001 | 23700000 | 0.141 | 1.254 | normal |
| chr12 | 23700001 | 23800000 | 0.045 | 1.093 | normal |
| chr12 | 23800001 | 23900000 | 0.049 | 1.075 | normal |
| chr12 | 23900001 | 24000000 | 0.075 | 0.869 | normal |
| chr12 | 24000001 | 24100000 | 0.075 | 0.958 | normal |
| chr12 | 24100001 | 24200000 | 0.070 | 1.182 | normal |
| chr12 | 24200001 | 24300000 | 0.125 | 1.076 | normal |
| chr12 | 24300001 | 24400000 | 0.119 | 1.025 | normal |
| chr12 | 24400001 | 24500000 | 0.096 | 1.160 | normal |
| chr12 | 24500001 | 24600000 | 0.077 | 1.084 | normal |
| chr12 | 24600001 | 24700000 | 0.205 | 0.576 | normal |
| chr12 | 24700001 | 24800000 | 0.208 | 1.625 | sig    |
| chr12 | 24800001 | 24900000 | 0.049 | 1.337 | normal |
| chr12 | 24900001 | 25000000 | 0.056 | 1.781 | normal |
| chr12 | 25000001 | 25100000 | 0.096 | 1.389 | normal |
| chr12 | 25100001 | 25200000 | 0.236 | 0.965 | normal |
| chr12 | 25200001 | 25300000 | 0.103 | 0.983 | normal |
| chr12 | 25300001 | 25400000 | 0.044 | 1.409 | normal |
| chr12 | 25400001 | 25500000 | 0.089 | 0.901 | normal |
| chr12 | 25500001 | 25600000 | 0.084 | 1.055 | normal |
| chr12 | 25600001 | 25700000 | 0.109 | 0.891 | normal |
| chr12 | 25700001 | 25800000 | 0.105 | 0.932 | normal |
| chr12 | 25800001 | 25900000 | 0.108 | 1.223 | normal |
| chr12 | 25900001 | 26000000 | 0.045 | 1.134 | normal |
| chr12 | 26000001 | 26100000 | 0.065 | 1.199 | normal |
| chr12 | 26100001 | 26200000 | 0.069 | 1.125 | normal |
| chr12 | 26200001 | 26300000 | 0.214 | 0.545 | normal |
| chr12 | 26300001 | 26400000 | 0.050 | 1.866 | normal |
| chr12 | 26400001 | 26500000 | 0.104 | 1.102 | normal |
| chr12 | 26500001 | 26600000 | 0.072 | 0.938 | normal |
| chr12 | 26600001 | 26700000 | 0.054 | 1.082 | normal |
| chr12 | 26700001 | 26800000 | 0.086 | 1.148 | normal |
| chr12 | 26800001 | 26900000 | 0.079 | 0.781 | normal |
| chr12 | 26900001 | 27000000 | 0.047 | 1.153 | normal |
| chr12 | 27000001 | 27100000 | 0.080 | 0.919 | normal |

|       |          |          |       |       |        |
|-------|----------|----------|-------|-------|--------|
| chr12 | 27100001 | 27200000 | 0.078 | 0.999 | normal |
| chr12 | 27200001 | 27300000 | 0.048 | 1.000 | normal |
| chr12 | 27300001 | 27400000 | 0.100 | 1.344 | normal |
| chr12 | 27400001 | 27500000 | 0.181 | 0.856 | normal |
| chr12 | 27500001 | 27600000 | 0.049 | 0.937 | normal |
| chr12 | 27600001 | 27700000 | 0.050 | 0.935 | normal |
| chr12 | 27700001 | 27800000 | 0.144 | 0.576 | normal |
| chr12 | 27800001 | 27900000 | 0.040 | 0.871 | normal |
| chr12 | 27900001 | 28000000 | 0.066 | 0.881 | normal |
| chr12 | 28000001 | 28100000 | 0.124 | 0.713 | normal |
| chr12 | 28100001 | 28200000 | 0.109 | 1.036 | normal |
| chr12 | 28200001 | 28300000 | 0.095 | 0.953 | normal |
| chr12 | 28300001 | 28400000 | 0.061 | 1.596 | normal |
| chr12 | 28400001 | 28500000 | 0.203 | 0.608 | normal |
| chr12 | 28500001 | 28600000 | 0.069 | 1.476 | normal |
| chr12 | 28600001 | 28700000 | 0.042 | 0.958 | normal |
| chr12 | 28700001 | 28800000 | 0.135 | 1.039 | normal |
| chr12 | 28800001 | 28900000 | 0.079 | 1.084 | normal |
| chr12 | 28900001 | 29000000 | 0.088 | 1.554 | normal |
| chr12 | 29000001 | 29100000 | 0.125 | 1.811 | normal |
| chr12 | 29100001 | 29200000 | 0.126 | 0.966 | normal |
| chr12 | 29200001 | 29300000 | 0.102 | 0.947 | normal |
| chr12 | 29300001 | 29400000 | 0.202 | 0.471 | normal |
| chr12 | 29400001 | 29500000 | 0.104 | 1.232 | normal |
| chr12 | 29500001 | 29600000 | 0.100 | 1.112 | normal |
| chr12 | 29600001 | 29700000 | 0.093 | 0.970 | normal |
| chr12 | 29700001 | 29800000 | 0.106 | 1.172 | normal |
| chr12 | 29800001 | 29900000 | 0.069 | 1.309 | normal |
| chr12 | 29900001 | 30000000 | 0.033 | 1.103 | normal |
| chr12 | 30000001 | 30100000 | 0.093 | 1.362 | normal |
| chr12 | 30100001 | 30200000 | 0.085 | 1.188 | normal |
| chr12 | 30200001 | 30300000 | 0.091 | 1.078 | normal |
| chr12 | 30300001 | 30400000 | 0.044 | 1.097 | normal |
| chr12 | 30400001 | 30500000 | 0.071 | 0.956 | normal |
| chr12 | 30500001 | 30600000 | 0.053 | 1.062 | normal |
| chr12 | 30600001 | 30700000 | 0.072 | 0.887 | normal |
| chr12 | 30700001 | 30800000 | 0.100 | 0.906 | normal |
| chr12 | 30800001 | 30900000 | 0.032 | 1.128 | normal |
| chr12 | 30900001 | 31000000 | 0.037 | 1.115 | normal |
| chr12 | 31000001 | 31100000 | 0.051 | 1.373 | normal |
| chr12 | 31100001 | 31200000 | 0.022 | 1.354 | normal |
| chr12 | 31200001 | 31300000 | 0.024 | 1.032 | normal |
| chr12 | 31300001 | 31400000 | 0.031 | 1.348 | normal |
| chr12 | 31400001 | 31500000 | 0.023 | 1.264 | normal |

|       |          |          |       |       |        |
|-------|----------|----------|-------|-------|--------|
| chr12 | 31500001 | 31600000 | 0.031 | 1.158 | normal |
| chr12 | 31600001 | 31700000 | 0.042 | 1.035 | normal |
| chr12 | 31700001 | 31800000 | 0.053 | 0.869 | normal |
| chr12 | 31800001 | 31900000 | 0.042 | 0.970 | normal |
| chr12 | 31900001 | 32000000 | 0.034 | 1.089 | normal |
| chr12 | 32000001 | 32100000 | 0.050 | 1.040 | normal |
| chr12 | 32100001 | 32200000 | 0.108 | 1.955 | normal |
| chr12 | 32200001 | 32300000 | 0.071 | 1.439 | normal |
| chr12 | 32300001 | 32400000 | 0.070 | 1.166 | normal |
| chr12 | 32400001 | 32500000 | 0.085 | 1.330 | normal |
| chr12 | 32500001 | 32600000 | 0.019 | 1.099 | normal |
| chr12 | 32600001 | 32700000 | 0.062 | 1.110 | normal |
| chr12 | 32700001 | 32800000 | 0.029 | 1.210 | normal |
| chr12 | 32800001 | 32900000 | 0.099 | 1.029 | normal |
| chr12 | 32900001 | 33000000 | 0.075 | 1.022 | normal |
| chr12 | 33000001 | 33100000 | 0.128 | 0.851 | normal |
| chr12 | 33100001 | 33200000 | 0.066 | 0.838 | normal |
| chr12 | 33200001 | 33300000 | 0.089 | 0.707 | normal |
| chr12 | 33300001 | 33400000 | 0.074 | 0.910 | normal |
| chr12 | 33400001 | 33500000 | 0.063 | 1.069 | normal |
| chr12 | 33500001 | 33600000 | 0.061 | 1.120 | normal |
| chr12 | 33600001 | 33700000 | 0.076 | 1.275 | normal |
| chr12 | 33700001 | 33800000 | 0.048 | 1.205 | normal |
| chr12 | 33800001 | 33900000 | 0.036 | 0.892 | normal |
| chr12 | 33900001 | 34000000 | 0.109 | 0.898 | normal |
| chr12 | 34000001 | 34100000 | 0.058 | 0.941 | normal |
| chr12 | 34100001 | 34200000 | 0.068 | 1.023 | normal |
| chr12 | 34200001 | 34300000 | 0.072 | 1.130 | normal |
| chr12 | 34300001 | 34400000 | 0.079 | 1.057 | normal |
| chr12 | 34400001 | 34500000 | 0.091 | 1.344 | normal |
| chr12 | 34500001 | 34600000 | 0.060 | 1.078 | normal |
| chr12 | 34600001 | 34700000 | 0.126 | 0.971 | normal |
| chr12 | 34700001 | 34800000 | 0.053 | 1.204 | normal |
| chr12 | 34800001 | 34900000 | 0.094 | 0.937 | normal |
| chr12 | 34900001 | 35000000 | 0.105 | 1.245 | normal |
| chr12 | 35000001 | 35100000 | 0.072 | 1.087 | normal |
| chr12 | 35100001 | 35200000 | 0.075 | 1.360 | normal |
| chr12 | 35200001 | 35300000 | 0.040 | 1.052 | normal |
| chr12 | 35300001 | 35400000 | 0.052 | 0.973 | normal |
| chr12 | 35400001 | 35500000 | 0.091 | 1.071 | normal |
| chr12 | 35500001 | 35600000 | 0.083 | 1.307 | normal |
| chr12 | 35600001 | 35700000 | 0.046 | 1.097 | normal |
| chr12 | 35700001 | 35800000 | 0.047 | 1.086 | normal |
| chr12 | 35800001 | 35900000 | 0.071 | 1.012 | normal |

|       |          |          |       |       |        |
|-------|----------|----------|-------|-------|--------|
| chr12 | 35900001 | 36000000 | 0.094 | 0.840 | normal |
| chr12 | 36000001 | 36100000 | 0.056 | 0.919 | normal |
| chr12 | 36100001 | 36200000 | 0.081 | 0.955 | normal |
| chr12 | 36200001 | 36300000 | 0.111 | 0.799 | normal |
| chr12 | 36300001 | 36400000 | 0.119 | 0.758 | normal |
| chr12 | 36400001 | 36500000 | 0.054 | 1.004 | normal |
| chr12 | 36500001 | 36600000 | 0.052 | 1.230 | normal |
| chr12 | 36600001 | 36700000 | 0.046 | 1.117 | normal |
| chr12 | 36700001 | 36800000 | 0.088 | 0.838 | normal |
| chr12 | 36800001 | 36900000 | 0.063 | 1.112 | normal |
| chr12 | 36900001 | 37000000 | 0.073 | 1.084 | normal |
| chr12 | 37000001 | 37100000 | 0.056 | 1.572 | normal |
| chr12 | 37100001 | 37200000 | 0.055 | 1.064 | normal |
| chr12 | 37200001 | 37300000 | 0.104 | 0.821 | normal |
| chr12 | 37300001 | 37400000 | 0.115 | 0.882 | normal |
| chr12 | 37400001 | 37500000 | 0.070 | 1.005 | normal |
| chr12 | 37500001 | 37600000 | 0.109 | 0.826 | normal |
| chr12 | 37600001 | 37700000 | 0.074 | 0.998 | normal |
| chr12 | 37700001 | 37800000 | 0.107 | 0.949 | normal |
| chr12 | 37800001 | 37900000 | 0.080 | 0.931 | normal |
| chr12 | 37900001 | 38000000 | 0.071 | 1.071 | normal |
| chr12 | 38000001 | 38100000 | 0.136 | 0.884 | normal |
| chr12 | 38100001 | 38200000 | 0.111 | 1.242 | normal |
| chr12 | 38200001 | 38300000 | 0.081 | 0.816 | normal |
| chr12 | 38300001 | 38400000 | 0.122 | 0.939 | normal |
| chr12 | 38400001 | 38500000 | 0.102 | 1.010 | normal |
| chr12 | 38500001 | 38600000 | 0.242 | 0.593 | normal |
| chr12 | 38600001 | 38700000 | 0.142 | 0.750 | normal |
| chr12 | 38700001 | 38800000 | 0.157 | 0.771 | normal |
| chr12 | 38800001 | 38900000 | 0.079 | 0.970 | normal |
| chr12 | 38900001 | 39000000 | 0.097 | 1.018 | normal |
| chr12 | 39000001 | 39100000 | 0.060 | 1.016 | normal |
| chr12 | 39100001 | 39200000 | 0.072 | 0.947 | normal |
| chr12 | 39200001 | 39300000 | 0.109 | 0.884 | normal |
| chr12 | 39300001 | 39400000 | 0.075 | 0.912 | normal |
| chr12 | 39400001 | 39500000 | 0.263 | 0.602 | normal |
| chr12 | 39500001 | 39600000 | 0.062 | 0.649 | normal |
| chr12 | 39600001 | 39700000 | 0.088 | 1.070 | normal |
| chr12 | 39700001 | 39800000 | 0.095 | 1.156 | normal |
| chr12 | 39800001 | 39900000 | 0.043 | 1.454 | normal |
| chr12 | 39900001 | 40000000 | 0.034 | 1.013 | normal |
| chr12 | 40000001 | 40100000 | 0.121 | 1.233 | normal |
| chr12 | 40100001 | 40200000 | 0.101 | 1.014 | normal |
| chr12 | 40200001 | 40300000 | 0.076 | 0.965 | normal |

|       |          |          |        |       |        |
|-------|----------|----------|--------|-------|--------|
| chr12 | 40300001 | 40400000 | 0.059  | 1.885 | normal |
| chr12 | 40400001 | 40500000 | 0.109  | 0.915 | normal |
| chr12 | 40500001 | 40600000 | 0.089  | 0.846 | normal |
| chr12 | 40600001 | 40700000 | 0.081  | 0.668 | normal |
| chr12 | 40700001 | 40800000 | 0.065  | 0.889 | normal |
| chr12 | 40800001 | 40900000 | 0.057  | 0.980 | normal |
| chr12 | 40900001 | 41000000 | 0.029  | 1.073 | normal |
| chr12 | 41000001 | 41100000 | 0.074  | 0.811 | normal |
| chr12 | 41100001 | 41200000 | 0.055  | 0.861 | normal |
| chr12 | 41200001 | 41300000 | 0.038  | 0.994 | normal |
| chr12 | 41300001 | 41400000 | 0.053  | 0.910 | normal |
| chr12 | 41400001 | 41500000 | 0.027  | 0.957 | normal |
| chr12 | 41500001 | 41600000 | 0.003  | 0.950 | normal |
| chr12 | 41600001 | 41700000 | 0.046  | 1.031 | normal |
| chr12 | 41700001 | 41800000 | 0.064  | 0.945 | normal |
| chr12 | 41800001 | 41900000 | 0.017  | 0.884 | normal |
| chr12 | 41900001 | 42000000 | 0.050  | 0.964 | normal |
| chr12 | 42000001 | 42100000 | 0.073  | 0.990 | normal |
| chr12 | 42100001 | 42200000 | 0.048  | 1.015 | normal |
| chr12 | 42200001 | 42300000 | 0.025  | 1.160 | normal |
| chr12 | 42300001 | 42400000 | 0.053  | 1.081 | normal |
| chr12 | 42400001 | 42500000 | 0.079  | 0.924 | normal |
| chr12 | 42500001 | 42600000 | 0.036  | 1.171 | normal |
| chr12 | 42600001 | 42700000 | -0.001 | 1.059 | normal |
| chr12 | 42700001 | 42800000 | 0.121  | 1.135 | normal |
| chr12 | 42800001 | 42900000 | 0.133  | 1.327 | normal |
| chr12 | 42900001 | 43000000 | 0.085  | 1.095 | normal |
| chr12 | 43000001 | 43100000 | 0.076  | 1.386 | normal |
| chr12 | 43100001 | 43200000 | 0.080  | 1.136 | normal |
| chr12 | 43200001 | 43300000 | 0.055  | 1.073 | normal |
| chr12 | 43300001 | 43400000 | 0.031  | 1.045 | normal |
| chr12 | 43400001 | 43500000 | 0.061  | 1.098 | normal |
| chr12 | 43500001 | 43600000 | 0.097  | 1.167 | normal |
| chr12 | 43600001 | 43700000 | 0.087  | 0.932 | normal |
| chr12 | 43700001 | 43800000 | 0.074  | 1.082 | normal |
| chr12 | 43800001 | 43900000 | 0.112  | 1.091 | normal |
| chr12 | 43900001 | 44000000 | 0.164  | 1.023 | normal |
| chr12 | 44000001 | 44100000 | 0.060  | 1.155 | normal |
| chr12 | 44100001 | 44200000 | 0.103  | 1.007 | normal |
| chr12 | 44200001 | 44300000 | 0.050  | 1.079 | normal |
| chr12 | 44300001 | 44400000 | 0.055  | 1.098 | normal |
| chr12 | 44400001 | 44500000 | 0.125  | 3.049 | normal |
| chr12 | 44500001 | 44600000 | 0.069  | 1.491 | normal |
| chr12 | 44600001 | 44700000 | 0.116  | 1.120 | normal |

|       |          |          |       |       |        |
|-------|----------|----------|-------|-------|--------|
| chr12 | 44700001 | 44800000 | 0.121 | 0.899 | normal |
| chr13 | 1        | 100000   | 0.033 | 1.337 | normal |
| chr13 | 100001   | 200000   | 0.021 | 1.447 | normal |
| chr13 | 200001   | 300000   | 0.044 | 1.291 | normal |
| chr13 | 300001   | 400000   | 0.035 | 1.095 | normal |
| chr13 | 400001   | 500000   | 0.085 | 0.701 | normal |
| chr13 | 500001   | 600000   | 0.032 | 0.988 | normal |
| chr13 | 600001   | 700000   | 0.029 | 1.049 | normal |
| chr13 | 700001   | 800000   | 0.050 | 1.029 | normal |
| chr13 | 800001   | 900000   | 0.046 | 1.077 | normal |
| chr13 | 900001   | 1000000  | 0.033 | 1.057 | normal |
| chr13 | 1000001  | 1100000  | 0.026 | 1.235 | normal |
| chr13 | 1100001  | 1200000  | 0.026 | 1.496 | normal |
| chr13 | 1200001  | 1300000  | 0.021 | 1.227 | normal |
| chr13 | 1300001  | 1400000  | 0.065 | 1.559 | normal |
| chr13 | 1400001  | 1500000  | 0.034 | 1.147 | normal |
| chr13 | 1500001  | 1600000  | 0.041 | 1.344 | normal |
| chr13 | 1600001  | 1700000  | 0.057 | 1.164 | normal |
| chr13 | 1700001  | 1800000  | 0.045 | 1.067 | normal |
| chr13 | 1800001  | 1900000  | 0.044 | 1.157 | normal |
| chr13 | 1900001  | 2000000  | 0.048 | 1.340 | normal |
| chr13 | 2000001  | 2100000  | 0.031 | 1.197 | normal |
| chr13 | 2100001  | 2200000  | 0.041 | 1.201 | normal |
| chr13 | 2200001  | 2300000  | 0.014 | 1.179 | normal |
| chr13 | 2300001  | 2400000  | 0.061 | 1.308 | normal |
| chr13 | 2400001  | 2500000  | 0.044 | 0.997 | normal |
| chr13 | 2500001  | 2600000  | 0.034 | 1.160 | normal |
| chr13 | 2600001  | 2700000  | 0.034 | 1.198 | normal |
| chr13 | 2700001  | 2800000  | 0.036 | 1.159 | normal |
| chr13 | 2800001  | 2900000  | 0.022 | 0.986 | normal |
| chr13 | 2900001  | 3000000  | 0.008 | 1.047 | normal |
| chr13 | 3000001  | 3100000  | 0.014 | 1.099 | normal |
| chr13 | 3100001  | 3200000  | 0.037 | 1.066 | normal |
| chr13 | 3200001  | 3300000  | 0.039 | 1.150 | normal |
| chr13 | 3300001  | 3400000  | 0.124 | 1.453 | normal |
| chr13 | 3400001  | 3500000  | 0.035 | 1.050 | normal |
| chr13 | 3500001  | 3600000  | 0.016 | 1.031 | normal |
| chr13 | 3600001  | 3700000  | 0.022 | 1.162 | normal |
| chr13 | 3700001  | 3800000  | 0.032 | 0.988 | normal |
| chr13 | 3800001  | 3900000  | 0.031 | 1.265 | normal |
| chr13 | 3900001  | 4000000  | 0.043 | 1.705 | normal |
| chr13 | 4000001  | 4100000  | 0.034 | 1.494 | normal |
| chr13 | 4100001  | 4200000  | 0.034 | 1.314 | normal |
| chr13 | 4200001  | 4300000  | 0.044 | 1.068 | normal |

|       |         |         |       |       |        |
|-------|---------|---------|-------|-------|--------|
| chr13 | 4300001 | 4400000 | 0.079 | 1.412 | normal |
| chr13 | 4400001 | 4500000 | 0.054 | 1.430 | normal |
| chr13 | 4500001 | 4600000 | 0.079 | 1.144 | normal |
| chr13 | 4600001 | 4700000 | 0.103 | 0.934 | normal |
| chr13 | 4700001 | 4800000 | 0.045 | 1.037 | normal |
| chr13 | 4800001 | 4900000 | 0.057 | 0.778 | normal |
| chr13 | 4900001 | 5000000 | 0.084 | 1.139 | normal |
| chr13 | 5000001 | 5100000 | 0.065 | 0.813 | normal |
| chr13 | 5100001 | 5200000 | 0.026 | 1.121 | normal |
| chr13 | 5200001 | 5300000 | 0.044 | 1.376 | normal |
| chr13 | 5300001 | 5400000 | 0.033 | 1.206 | normal |
| chr13 | 5400001 | 5500000 | 0.057 | 1.038 | normal |
| chr13 | 5500001 | 5600000 | 0.101 | 1.161 | normal |
| chr13 | 5600001 | 5700000 | 0.132 | 1.219 | normal |
| chr13 | 5700001 | 5800000 | 0.079 | 1.437 | normal |
| chr13 | 5800001 | 5900000 | 0.081 | 0.828 | normal |
| chr13 | 5900001 | 6000000 | 0.056 | 1.082 | normal |
| chr13 | 6000001 | 6100000 | 0.058 | 1.362 | normal |
| chr13 | 6100001 | 6200000 | 0.073 | 1.504 | normal |
| chr13 | 6200001 | 6300000 | 0.045 | 1.336 | normal |
| chr13 | 6300001 | 6400000 | 0.079 | 1.076 | normal |
| chr13 | 6400001 | 6500000 | 0.133 | 1.073 | normal |
| chr13 | 6500001 | 6600000 | 0.155 | 0.680 | normal |
| chr13 | 6600001 | 6700000 | 0.088 | 1.041 | normal |
| chr13 | 6700001 | 6800000 | 0.077 | 1.337 | normal |
| chr13 | 6800001 | 6900000 | 0.048 | 1.098 | normal |
| chr13 | 6900001 | 7000000 | 0.085 | 0.826 | normal |
| chr13 | 7000001 | 7100000 | 0.075 | 0.970 | normal |
| chr13 | 7100001 | 7200000 | 0.091 | 0.889 | normal |
| chr13 | 7200001 | 7300000 | 0.170 | 0.596 | normal |
| chr13 | 7300001 | 7400000 | 0.034 | 1.116 | normal |
| chr13 | 7400001 | 7500000 | 0.093 | 0.594 | normal |
| chr13 | 7500001 | 7600000 | 0.090 | 0.693 | normal |
| chr13 | 7600001 | 7700000 | 0.079 | 0.872 | normal |
| chr13 | 7700001 | 7800000 | 0.072 | 0.903 | normal |
| chr13 | 7800001 | 7900000 | 0.017 | 1.081 | normal |
| chr13 | 7900001 | 8000000 | 0.027 | 0.969 | normal |
| chr13 | 8000001 | 8100000 | 0.004 | 1.062 | normal |
| chr13 | 8100001 | 8200000 | 0.048 | 1.164 | normal |
| chr13 | 8200001 | 8300000 | 0.059 | 1.918 | normal |
| chr13 | 8300001 | 8400000 | 0.034 | 1.119 | normal |
| chr13 | 8400001 | 8500000 | 0.031 | 1.131 | normal |
| chr13 | 8500001 | 8600000 | 0.022 | 0.952 | normal |
| chr13 | 8600001 | 8700000 | 0.022 | 1.142 | normal |



|       |          |          |       |       |        |
|-------|----------|----------|-------|-------|--------|
| chr13 | 8700001  | 8800000  | 0.053 | 0.834 | normal |
| chr13 | 8800001  | 8900000  | 0.052 | 0.993 | normal |
| chr13 | 8900001  | 9000000  | 0.065 | 1.060 | normal |
| chr13 | 9000001  | 9100000  | 0.046 | 1.174 | normal |
| chr13 | 9100001  | 9200000  | 0.010 | 1.068 | normal |
| chr13 | 9200001  | 9300000  | 0.041 | 1.020 | normal |
| chr13 | 9300001  | 9400000  | 0.092 | 1.205 | normal |
| chr13 | 9400001  | 9500000  | 0.075 | 1.149 | normal |
| chr13 | 9500001  | 9600000  | 0.028 | 0.803 | normal |
| chr13 | 9600001  | 9700000  | 0.046 | 0.961 | normal |
| chr13 | 9700001  | 9800000  | 0.147 | 0.599 | normal |
| chr13 | 9800001  | 9900000  | 0.099 | 0.950 | normal |
| chr13 | 9900001  | 10000000 | 0.078 | 1.158 | normal |
| chr13 | 10000001 | 10100000 | 0.046 | 1.119 | normal |
| chr13 | 10100001 | 10200000 | 0.037 | 0.905 | normal |
| chr13 | 10200001 | 10300000 | 0.031 | 1.025 | normal |
| chr13 | 10300001 | 10400000 | 0.060 | 1.216 | normal |
| chr13 | 10400001 | 10500000 | 0.041 | 1.097 | normal |
| chr13 | 10500001 | 10600000 | 0.067 | 1.148 | normal |
| chr13 | 10600001 | 10700000 | 0.054 | 0.800 | normal |
| chr13 | 10700001 | 10800000 | 0.035 | 1.257 | normal |
| chr13 | 10800001 | 10900000 | 0.092 | 0.760 | normal |
| chr13 | 10900001 | 11000000 | 0.118 | 0.670 | normal |
| chr13 | 11000001 | 11100000 | 0.044 | 1.100 | normal |
| chr13 | 11100001 | 11200000 | 0.048 | 1.026 | normal |
| chr13 | 11200001 | 11300000 | 0.053 | 1.815 | normal |
| chr13 | 11300001 | 11400000 | 0.016 | 0.910 | normal |
| chr13 | 11400001 | 11500000 | 0.032 | 0.971 | normal |
| chr13 | 11500001 | 11600000 | 0.066 | 1.694 | normal |
| chr13 | 11600001 | 11700000 | 0.073 | 1.465 | normal |
| chr13 | 11700001 | 11800000 | 0.085 | 0.796 | normal |
| chr13 | 11800001 | 11900000 | 0.110 | 1.227 | normal |
| chr13 | 11900001 | 12000000 | 0.080 | 0.968 | normal |
| chr13 | 12000001 | 12100000 | 0.030 | 1.131 | normal |
| chr13 | 12100001 | 12200000 | 0.042 | 1.069 | normal |
| chr13 | 12200001 | 12300000 | 0.075 | 0.905 | normal |
| chr13 | 12300001 | 12400000 | 0.079 | 1.169 | normal |
| chr13 | 12400001 | 12500000 | 0.031 | 0.969 | normal |
| chr13 | 12500001 | 12600000 | 0.052 | 1.517 | normal |
| chr13 | 12600001 | 12700000 | 0.109 | 1.165 | normal |
| chr13 | 12700001 | 12800000 | 0.202 | 0.899 | normal |
| chr13 | 12800001 | 12900000 | 0.147 | 0.722 | normal |
| chr13 | 12900001 | 13000000 | 0.054 | 1.009 | normal |
| chr13 | 13000001 | 13100000 | 0.065 | 1.089 | normal |

|       |          |          |       |       |        |
|-------|----------|----------|-------|-------|--------|
| chr13 | 13100001 | 13200000 | 0.068 | 1.213 | normal |
| chr13 | 13200001 | 13300000 | 0.104 | 1.164 | normal |
| chr13 | 13300001 | 13400000 | 0.148 | 0.998 | normal |
| chr13 | 13400001 | 13500000 | 0.101 | 1.047 | normal |
| chr13 | 13500001 | 13600000 | 0.095 | 1.049 | normal |
| chr13 | 13600001 | 13700000 | 0.101 | 1.079 | normal |
| chr13 | 13700001 | 13800000 | 0.092 | 0.798 | normal |
| chr13 | 13800001 | 13900000 | 0.044 | 0.763 | normal |
| chr13 | 13900001 | 14000000 | 0.033 | 1.036 | normal |
| chr13 | 14000001 | 14100000 | 0.021 | 1.244 | normal |
| chr13 | 14100001 | 14200000 | 0.054 | 1.628 | normal |
| chr13 | 14200001 | 14300000 | 0.031 | 0.956 | normal |
| chr13 | 14300001 | 14400000 | 0.047 | 0.806 | normal |
| chr13 | 14400001 | 14500000 | 0.064 | 0.848 | normal |
| chr13 | 14500001 | 14600000 | 0.068 | 1.015 | normal |
| chr13 | 14600001 | 14700000 | 0.057 | 0.989 | normal |
| chr13 | 14700001 | 14800000 | 0.100 | 0.808 | normal |
| chr13 | 14800001 | 14900000 | 0.066 | 1.500 | normal |
| chr13 | 14900001 | 15000000 | 0.107 | 1.631 | normal |
| chr13 | 15000001 | 15100000 | 0.090 | 0.802 | normal |
| chr13 | 15100001 | 15200000 | 0.060 | 0.963 | normal |
| chr13 | 15200001 | 15300000 | 0.058 | 1.548 | normal |
| chr13 | 15300001 | 15400000 | 0.039 | 1.130 | normal |
| chr13 | 15400001 | 15500000 | 0.039 | 1.050 | normal |
| chr13 | 15500001 | 15600000 | 0.039 | 1.080 | normal |
| chr13 | 15600001 | 15700000 | 0.064 | 1.117 | normal |
| chr13 | 15700001 | 15800000 | 0.071 | 0.790 | normal |
| chr13 | 15800001 | 15900000 | 0.076 | 0.715 | normal |
| chr13 | 15900001 | 16000000 | 0.076 | 1.012 | normal |
| chr13 | 16000001 | 16100000 | 0.047 | 1.130 | normal |
| chr13 | 16100001 | 16200000 | 0.057 | 1.330 | normal |
| chr13 | 16200001 | 16300000 | 0.060 | 1.208 | normal |
| chr13 | 16300001 | 16400000 | 0.043 | 1.187 | normal |
| chr13 | 16400001 | 16500000 | 0.066 | 1.476 | normal |
| chr13 | 16500001 | 16600000 | 0.059 | 1.449 | normal |
| chr13 | 16600001 | 16700000 | 0.060 | 1.403 | normal |
| chr13 | 16700001 | 16800000 | 0.060 | 1.272 | normal |
| chr13 | 16800001 | 16900000 | 0.051 | 1.271 | normal |
| chr13 | 16900001 | 17000000 | 0.055 | 1.298 | normal |
| chr13 | 17000001 | 17100000 | 0.060 | 1.248 | normal |
| chr13 | 17100001 | 17200000 | 0.066 | 0.886 | normal |
| chr13 | 17200001 | 17300000 | 0.073 | 0.954 | normal |
| chr13 | 17300001 | 17400000 | 0.048 | 1.021 | normal |
| chr13 | 17400001 | 17500000 | 0.040 | 1.071 | normal |

|       |          |          |       |       |        |
|-------|----------|----------|-------|-------|--------|
| chr13 | 17500001 | 17600000 | 0.094 | 1.108 | normal |
| chr13 | 17600001 | 17700000 | 0.151 | 0.927 | normal |
| chr13 | 17700001 | 17800000 | 0.066 | 0.957 | normal |
| chr13 | 17800001 | 17900000 | 0.027 | 1.022 | normal |
| chr13 | 17900001 | 18000000 | 0.007 | 0.986 | normal |
| chr13 | 18000001 | 18100000 | 0.019 | 1.029 | normal |
| chr13 | 18100001 | 18200000 | 0.037 | 1.069 | normal |
| chr13 | 18200001 | 18300000 | 0.057 | 1.019 | normal |
| chr13 | 18300001 | 18400000 | 0.034 | 1.130 | normal |
| chr13 | 18400001 | 18500000 | 0.029 | 1.054 | normal |
| chr13 | 18500001 | 18600000 | 0.034 | 0.891 | normal |
| chr13 | 18600001 | 18700000 | 0.017 | 0.978 | normal |
| chr13 | 18700001 | 18800000 | 0.071 | 1.806 | normal |
| chr13 | 18800001 | 18900000 | 0.037 | 1.039 | normal |
| chr13 | 18900001 | 19000000 | 0.168 | 0.291 | normal |
| chr13 | 19000001 | 19100000 | 0.031 | 1.095 | normal |
| chr13 | 19100001 | 19200000 | 0.051 | 1.076 | normal |
| chr13 | 19200001 | 19300000 | 0.051 | 1.289 | normal |
| chr13 | 19300001 | 19400000 | 0.060 | 1.368 | normal |
| chr13 | 19400001 | 19500000 | 0.056 | 0.462 | normal |
| chr13 | 19500001 | 19600000 | 0.027 | 0.959 | normal |
| chr13 | 19600001 | 19700000 | 0.047 | 1.010 | normal |
| chr13 | 19700001 | 19800000 | 0.045 | 1.100 | normal |
| chr13 | 19800001 | 19900000 | 0.036 | 1.286 | normal |
| chr13 | 19900001 | 20000000 | 0.041 | 1.345 | normal |
| chr13 | 20000001 | 20100000 | 0.053 | 1.412 | normal |
| chr13 | 20100001 | 20200000 | 0.055 | 1.437 | normal |
| chr13 | 20200001 | 20300000 | 0.060 | 1.343 | normal |
| chr13 | 20300001 | 20400000 | 0.055 | 1.314 | normal |
| chr13 | 20400001 | 20500000 | 0.057 | 1.401 | normal |
| chr13 | 20500001 | 20600000 | 0.082 | 1.529 | normal |
| chr13 | 20600001 | 20700000 | 0.104 | 1.816 | normal |
| chr13 | 20700001 | 20800000 | 0.064 | 0.923 | normal |
| chr13 | 20800001 | 20900000 | 0.043 | 0.554 | normal |
| chr13 | 20900001 | 21000000 | 0.080 | 1.316 | normal |
| chr13 | 21000001 | 21100000 | 0.090 | 1.469 | normal |
| chr13 | 21100001 | 21200000 | 0.062 | 1.369 | normal |
| chr13 | 21200001 | 21300000 | 0.059 | 1.327 | normal |
| chr13 | 21300001 | 21400000 | 0.032 | 0.919 | normal |
| chr13 | 21400001 | 21500000 | 0.042 | 1.227 | normal |
| chr13 | 21500001 | 21600000 | 0.012 | 1.049 | normal |
| chr13 | 21600001 | 21700000 | 0.000 | 0.980 | normal |
| chr13 | 21700001 | 21800000 | 0.075 | 1.019 | normal |
| chr13 | 21800001 | 21900000 | 0.065 | 1.167 | normal |

|       |          |          |       |       |        |
|-------|----------|----------|-------|-------|--------|
| chr13 | 21900001 | 22000000 | 0.140 | 0.799 | normal |
| chr13 | 22000001 | 22100000 | 0.050 | 1.227 | normal |
| chr13 | 22100001 | 22200000 | 0.027 | 1.603 | normal |
| chr13 | 22200001 | 22300000 | 0.055 | 1.534 | normal |
| chr13 | 22300001 | 22400000 | 0.070 | 1.686 | normal |
| chr13 | 22400001 | 22500000 | 0.060 | 1.602 | normal |
| chr13 | 22500001 | 22600000 | 0.092 | 1.572 | normal |
| chr13 | 22600001 | 22700000 | 0.069 | 1.354 | normal |
| chr13 | 22700001 | 22800000 | 0.044 | 1.020 | normal |
| chr13 | 22800001 | 22900000 | 0.030 | 0.846 | normal |
| chr13 | 22900001 | 23000000 | 0.030 | 0.842 | normal |
| chr13 | 23000001 | 23100000 | 0.115 | 0.715 | normal |
| chr13 | 23100001 | 23200000 | 0.110 | 0.835 | normal |
| chr13 | 23200001 | 23300000 | 0.099 | 0.867 | normal |
| chr13 | 23300001 | 23400000 | 0.075 | 0.995 | normal |
| chr13 | 23400001 | 23500000 | 0.059 | 1.156 | normal |
| chr13 | 23500001 | 23600000 | 0.062 | 1.865 | normal |
| chr13 | 23600001 | 23700000 | 0.035 | 1.241 | normal |
| chr13 | 23700001 | 23800000 | 0.026 | 1.013 | normal |
| chr13 | 23800001 | 23900000 | 0.055 | 1.300 | normal |
| chr13 | 23900001 | 24000000 | 0.025 | 1.063 | normal |
| chr13 | 24000001 | 24100000 | 0.049 | 0.991 | normal |
| chr13 | 24100001 | 24200000 | 0.066 | 0.919 | normal |
| chr13 | 24200001 | 24300000 | 0.073 | 1.798 | normal |
| chr13 | 24300001 | 24400000 | 0.029 | 1.090 | normal |
| chr13 | 24400001 | 24500000 | 0.073 | 1.220 | normal |
| chr13 | 24500001 | 24600000 | 0.059 | 0.924 | normal |
| chr13 | 24600001 | 24700000 | 0.075 | 0.738 | normal |
| chr13 | 24700001 | 24800000 | 0.189 | 1.198 | normal |
| chr13 | 24800001 | 24900000 | 0.084 | 0.979 | normal |
| chr13 | 24900001 | 25000000 | 0.063 | 0.978 | normal |
| chr13 | 25000001 | 25100000 | 0.050 | 1.318 | normal |
| chr13 | 25100001 | 25200000 | 0.075 | 1.365 | normal |
| chr13 | 25200001 | 25300000 | 0.021 | 0.900 | normal |
| chr13 | 25300001 | 25400000 | 0.062 | 1.552 | normal |
| chr13 | 25400001 | 25500000 | 0.046 | 1.203 | normal |
| chr13 | 25500001 | 25600000 | 0.044 | 1.005 | normal |
| chr13 | 25600001 | 25700000 | 0.063 | 0.996 | normal |
| chr13 | 25700001 | 25800000 | 0.021 | 0.913 | normal |
| chr13 | 25800001 | 25900000 | 0.107 | 0.614 | normal |
| chr13 | 25900001 | 26000000 | 0.053 | 1.182 | normal |
| chr13 | 26000001 | 26100000 | 0.052 | 0.640 | normal |
| chr13 | 26100001 | 26200000 | 0.036 | 1.038 | normal |
| chr13 | 26200001 | 26300000 | 0.093 | 0.666 | normal |

|       |          |          |       |       |        |
|-------|----------|----------|-------|-------|--------|
| chr13 | 26300001 | 26400000 | 0.052 | 0.778 | normal |
| chr13 | 26400001 | 26500000 | 0.043 | 1.045 | normal |
| chr13 | 26500001 | 26600000 | 0.029 | 1.122 | normal |
| chr13 | 26600001 | 26700000 | 0.087 | 1.453 | normal |
| chr13 | 26700001 | 26800000 | 0.113 | 1.320 | normal |
| chr13 | 26800001 | 26900000 | 0.075 | 1.678 | normal |
| chr13 | 26900001 | 27000000 | 0.070 | 0.937 | normal |
| chr13 | 27000001 | 27100000 | 0.023 | 1.050 | normal |
| chr13 | 27100001 | 27200000 | 0.039 | 1.059 | normal |
| chr13 | 27200001 | 27300000 | 0.045 | 1.283 | normal |
| chr13 | 27300001 | 27400000 | 0.078 | 1.338 | normal |
| chr13 | 27400001 | 27500000 | 0.043 | 1.098 | normal |
| chr13 | 27500001 | 27600000 | 0.059 | 1.151 | normal |
| chr13 | 27600001 | 27700000 | 0.032 | 1.135 | normal |
| chr13 | 27700001 | 27800000 | 0.041 | 0.992 | normal |
| chr13 | 27800001 | 27900000 | 0.045 | 0.989 | normal |
| chr13 | 27900001 | 28000000 | 0.085 | 1.018 | normal |
| chr13 | 28000001 | 28100000 | 0.090 | 1.141 | normal |
| chr13 | 28100001 | 28200000 | 0.110 | 1.278 | normal |
| chr13 | 28200001 | 28300000 | 0.072 | 1.475 | normal |
| chr13 | 28300001 | 28400000 | 0.062 | 1.104 | normal |
| chr13 | 28400001 | 28500000 | 0.063 | 1.487 | normal |
| chr13 | 28500001 | 28600000 | 0.062 | 1.190 | normal |
| chr13 | 28600001 | 28700000 | 0.061 | 0.752 | normal |
| chr13 | 28700001 | 28800000 | 0.070 | 1.031 | normal |
| chr13 | 28800001 | 28900000 | 0.071 | 1.070 | normal |
| chr13 | 28900001 | 29000000 | 0.032 | 1.004 | normal |
| chr13 | 29000001 | 29100000 | 0.052 | 1.193 | normal |
| chr13 | 29100001 | 29200000 | 0.075 | 1.036 | normal |
| chr13 | 29200001 | 29300000 | 0.082 | 0.881 | normal |
| chr13 | 29300001 | 29400000 | 0.059 | 1.236 | normal |
| chr13 | 29400001 | 29500000 | 0.037 | 1.179 | normal |
| chr13 | 29500001 | 29600000 | 0.040 | 0.959 | normal |
| chr13 | 29600001 | 29700000 | 0.059 | 2.022 | normal |
| chr13 | 29700001 | 29800000 | 0.057 | 1.537 | normal |
| chr13 | 29800001 | 29900000 | 0.052 | 1.321 | normal |
| chr13 | 29900001 | 30000000 | 0.040 | 0.945 | normal |
| chr13 | 30000001 | 30100000 | 0.032 | 1.032 | normal |
| chr13 | 30100001 | 30200000 | 0.039 | 1.014 | normal |
| chr13 | 30200001 | 30300000 | 0.014 | 1.071 | normal |
| chr13 | 30300001 | 30400000 | 0.066 | 1.058 | normal |
| chr13 | 30400001 | 30500000 | 0.042 | 0.969 | normal |
| chr13 | 30500001 | 30600000 | 0.048 | 1.070 | normal |
| chr13 | 30600001 | 30700000 | 0.060 | 1.032 | normal |

|       |          |          |       |       |        |
|-------|----------|----------|-------|-------|--------|
| chr13 | 30700001 | 30800000 | 0.032 | 0.961 | normal |
| chr13 | 30800001 | 30900000 | 0.037 | 0.940 | normal |
| chr13 | 30900001 | 31000000 | 0.027 | 1.003 | normal |
| chr13 | 31000001 | 31100000 | 0.056 | 1.070 | normal |
| chr13 | 31100001 | 31200000 | 0.065 | 1.200 | normal |
| chr13 | 31200001 | 31300000 | 0.060 | 1.162 | normal |
| chr13 | 31300001 | 31400000 | 0.035 | 1.042 | normal |
| chr13 | 31400001 | 31500000 | 0.045 | 1.048 | normal |
| chr13 | 31500001 | 31600000 | 0.044 | 0.947 | normal |
| chr13 | 31600001 | 31700000 | 0.057 | 1.237 | normal |
| chr13 | 31700001 | 31800000 | 0.066 | 1.073 | normal |
| chr13 | 31800001 | 31900000 | 0.078 | 0.918 | normal |
| chr13 | 31900001 | 32000000 | 0.056 | 1.025 | normal |
| chr13 | 32000001 | 32100000 | 0.090 | 1.440 | normal |
| chr13 | 32100001 | 32200000 | 0.061 | 1.063 | normal |
| chr13 | 32200001 | 32300000 | 0.076 | 0.904 | normal |
| chr13 | 32300001 | 32400000 | 0.040 | 1.033 | normal |
| chr13 | 32400001 | 32500000 | 0.047 | 0.915 | normal |
| chr13 | 32500001 | 32600000 | 0.065 | 1.509 | normal |
| chr13 | 32600001 | 32700000 | 0.054 | 0.994 | normal |
| chr13 | 32700001 | 32800000 | 0.051 | 1.052 | normal |
| chr13 | 32800001 | 32900000 | 0.076 | 1.305 | normal |
| chr13 | 32900001 | 33000000 | 0.073 | 1.196 | normal |
| chr13 | 33000001 | 33100000 | 0.069 | 1.214 | normal |
| chr13 | 33100001 | 33200000 | 0.050 | 1.146 | normal |
| chr13 | 33200001 | 33300000 | 0.069 | 1.074 | normal |
| chr13 | 33300001 | 33400000 | 0.053 | 1.073 | normal |
| chr13 | 33400001 | 33500000 | 0.052 | 1.100 | normal |
| chr13 | 33500001 | 33600000 | 0.060 | 1.301 | normal |
| chr13 | 33600001 | 33700000 | 0.040 | 1.183 | normal |
| chr13 | 33700001 | 33800000 | 0.019 | 1.219 | normal |
| chr13 | 33800001 | 33900000 | 0.014 | 1.047 | normal |
| chr13 | 33900001 | 34000000 | 0.021 | 1.028 | normal |
| chr13 | 34000001 | 34100000 | 0.026 | 1.098 | normal |
| chr13 | 34100001 | 34200000 | 0.013 | 1.085 | normal |
| chr13 | 34200001 | 34300000 | 0.025 | 1.022 | normal |
| chr13 | 34300001 | 34400000 | 0.025 | 1.036 | normal |
| chr13 | 34400001 | 34500000 | 0.050 | 1.065 | normal |
| chr13 | 34500001 | 34600000 | 0.050 | 0.976 | normal |
| chr13 | 34600001 | 34700000 | 0.050 | 1.376 | normal |
| chr13 | 34700001 | 34800000 | 0.074 | 1.434 | normal |
| chr13 | 34800001 | 34900000 | 0.051 | 1.584 | normal |
| chr13 | 34900001 | 35000000 | 0.040 | 1.285 | normal |
| chr13 | 35000001 | 35100000 | 0.018 | 1.102 | normal |

|       |          |          |       |       |        |
|-------|----------|----------|-------|-------|--------|
| chr13 | 35100001 | 35200000 | 0.062 | 1.167 | normal |
| chr13 | 35200001 | 35300000 | 0.070 | 1.030 | normal |
| chr13 | 35300001 | 35400000 | 0.034 | 1.059 | normal |
| chr13 | 35400001 | 35500000 | 0.032 | 0.960 | normal |
| chr13 | 35500001 | 35600000 | 0.054 | 1.284 | normal |
| chr13 | 35600001 | 35700000 | 0.027 | 1.532 | normal |
| chr13 | 35700001 | 35800000 | 0.062 | 1.435 | normal |
| chr13 | 35800001 | 35900000 | 0.063 | 1.808 | normal |
| chr13 | 35900001 | 36000000 | 0.031 | 1.323 | normal |
| chr13 | 36000001 | 36100000 | 0.037 | 1.391 | normal |
| chr13 | 36100001 | 36200000 | 0.085 | 0.987 | normal |
| chr13 | 36200001 | 36300000 | 0.042 | 1.157 | normal |
| chr13 | 36300001 | 36400000 | 0.042 | 1.107 | normal |
| chr13 | 36400001 | 36500000 | 0.052 | 1.069 | normal |
| chr13 | 36500001 | 36600000 | 0.037 | 1.119 | normal |
| chr13 | 36600001 | 36700000 | 0.038 | 1.074 | normal |
| chr13 | 36700001 | 36800000 | 0.036 | 1.076 | normal |
| chr13 | 36800001 | 36900000 | 0.047 | 1.102 | normal |
| chr13 | 36900001 | 37000000 | 0.064 | 1.406 | normal |
| chr13 | 37000001 | 37100000 | 0.063 | 1.758 | normal |
| chr13 | 37100001 | 37200000 | 0.032 | 1.089 | normal |
| chr13 | 37200001 | 37300000 | 0.034 | 1.251 | normal |
| chr13 | 37300001 | 37400000 | 0.059 | 1.184 | normal |
| chr13 | 37400001 | 37500000 | 0.036 | 1.009 | normal |
| chr13 | 37500001 | 37600000 | 0.056 | 1.749 | normal |
| chr13 | 37600001 | 37700000 | 0.059 | 1.142 | normal |
| chr13 | 37700001 | 37800000 | 0.067 | 3.026 | normal |
| chr13 | 37800001 | 37900000 | 0.029 | 1.194 | normal |
| chr13 | 37900001 | 38000000 | 0.022 | 1.140 | normal |
| chr13 | 38000001 | 38100000 | 0.053 | 1.231 | normal |
| chr13 | 38100001 | 38200000 | 0.021 | 1.229 | normal |
| chr13 | 38200001 | 38300000 | 0.041 | 1.067 | normal |
| chr13 | 38300001 | 38400000 | 0.079 | 1.071 | normal |
| chr13 | 38400001 | 38500000 | 0.066 | 1.176 | normal |
| chr13 | 38500001 | 38600000 | 0.085 | 0.884 | normal |
| chr13 | 38600001 | 38700000 | 0.082 | 0.920 | normal |
| chr13 | 38700001 | 38800000 | 0.067 | 1.490 | normal |
| chr13 | 38800001 | 38900000 | 0.049 | 1.096 | normal |
| chr13 | 38900001 | 39000000 | 0.089 | 0.984 | normal |
| chr13 | 39000001 | 39100000 | 0.109 | 0.888 | normal |
| chr13 | 39100001 | 39200000 | 0.047 | 1.507 | normal |
| chr13 | 39200001 | 39300000 | 0.078 | 1.280 | normal |
| chr13 | 39300001 | 39400000 | 0.101 | 0.986 | normal |
| chr13 | 39400001 | 39500000 | 0.085 | 1.205 | normal |

|       |          |          |       |       |        |
|-------|----------|----------|-------|-------|--------|
| chr13 | 39500001 | 39600000 | 0.065 | 1.151 | normal |
| chr13 | 39600001 | 39700000 | 0.073 | 1.084 | normal |
| chr13 | 39700001 | 39800000 | 0.094 | 1.158 | normal |
| chr13 | 39800001 | 39900000 | 0.088 | 1.294 | normal |
| chr13 | 39900001 | 40000000 | 0.108 | 1.332 | normal |
| chr13 | 40000001 | 40100000 | 0.128 | 1.892 | normal |
| chr13 | 40100001 | 40200000 | 0.037 | 1.138 | normal |
| chr13 | 40200001 | 40300000 | 0.094 | 0.859 | normal |
| chr13 | 40300001 | 40400000 | 0.176 | 0.665 | normal |
| chr13 | 40400001 | 40500000 | 0.060 | 1.044 | normal |
| chr13 | 40500001 | 40600000 | 0.027 | 1.018 | normal |
| chr13 | 40600001 | 40700000 | 0.099 | 0.806 | normal |
| chr13 | 40700001 | 40800000 | 0.067 | 0.888 | normal |
| chr13 | 40800001 | 40900000 | 0.065 | 0.881 | normal |
| chr14 | 1        | 100000   | 0.033 | 1.258 | normal |
| chr14 | 100001   | 200000   | 0.063 | 1.332 | normal |
| chr14 | 200001   | 300000   | 0.082 | 1.108 | normal |
| chr14 | 300001   | 400000   | 0.057 | 1.376 | normal |
| chr14 | 400001   | 500000   | 0.072 | 1.459 | normal |
| chr14 | 500001   | 600000   | 0.061 | 1.569 | normal |
| chr14 | 600001   | 700000   | 0.080 | 1.289 | normal |
| chr14 | 700001   | 800000   | 0.072 | 1.104 | normal |
| chr14 | 800001   | 900000   | 0.079 | 1.105 | normal |
| chr14 | 900001   | 1000000  | 0.050 | 1.083 | normal |
| chr14 | 1000001  | 1100000  | 0.098 | 1.016 | normal |
| chr14 | 1100001  | 1200000  | 0.182 | 0.693 | normal |
| chr14 | 1200001  | 1300000  | 0.211 | 0.671 | normal |
| chr14 | 1300001  | 1400000  | 0.143 | 1.141 | normal |
| chr14 | 1400001  | 1500000  | 0.100 | 1.144 | normal |
| chr14 | 1500001  | 1600000  | 0.054 | 0.959 | normal |
| chr14 | 1600001  | 1700000  | 0.014 | 0.976 | normal |
| chr14 | 1700001  | 1800000  | 0.083 | 0.819 | normal |
| chr14 | 1800001  | 1900000  | 0.065 | 0.813 | normal |
| chr14 | 1900001  | 2000000  | 0.148 | 0.749 | normal |
| chr14 | 2000001  | 2100000  | 0.121 | 1.127 | normal |
| chr14 | 2100001  | 2200000  | 0.098 | 0.990 | normal |
| chr14 | 2200001  | 2300000  | 0.061 | 1.015 | normal |
| chr14 | 2300001  | 2400000  | 0.119 | 0.723 | normal |
| chr14 | 2400001  | 2500000  | 0.095 | 0.849 | normal |
| chr14 | 2500001  | 2600000  | 0.107 | 0.857 | normal |
| chr14 | 2600001  | 2700000  | 0.214 | 0.507 | normal |
| chr14 | 2700001  | 2800000  | 0.080 | 0.793 | normal |
| chr14 | 2800001  | 2900000  | 0.121 | 1.018 | normal |
| chr14 | 2900001  | 3000000  | 0.124 | 0.675 | normal |



|       |         |         |       |       |        |
|-------|---------|---------|-------|-------|--------|
| chr14 | 3000001 | 3100000 | 0.105 | 0.905 | normal |
| chr14 | 3100001 | 3200000 | 0.079 | 0.926 | normal |
| chr14 | 3200001 | 3300000 | 0.078 | 0.889 | normal |
| chr14 | 3300001 | 3400000 | 0.083 | 0.971 | normal |
| chr14 | 3400001 | 3500000 | 0.079 | 0.906 | normal |
| chr14 | 3500001 | 3600000 | 0.080 | 0.894 | normal |
| chr14 | 3600001 | 3700000 | 0.086 | 0.972 | normal |
| chr14 | 3700001 | 3800000 | 0.078 | 0.992 | normal |
| chr14 | 3800001 | 3900000 | 0.127 | 0.967 | normal |
| chr14 | 3900001 | 4000000 | 0.057 | 1.245 | normal |
| chr14 | 4000001 | 4100000 | 0.087 | 0.986 | normal |
| chr14 | 4100001 | 4200000 | 0.123 | 0.562 | normal |
| chr14 | 4200001 | 4300000 | 0.081 | 0.986 | normal |
| chr14 | 4300001 | 4400000 | 0.061 | 0.842 | normal |
| chr14 | 4400001 | 4500000 | 0.057 | 1.028 | normal |
| chr14 | 4500001 | 4600000 | 0.061 | 0.715 | normal |
| chr14 | 4600001 | 4700000 | 0.051 | 1.240 | normal |
| chr14 | 4700001 | 4800000 | 0.104 | 1.111 | normal |
| chr14 | 4800001 | 4900000 | 0.107 | 0.843 | normal |
| chr14 | 4900001 | 5000000 | 0.087 | 0.896 | normal |
| chr14 | 5000001 | 5100000 | 0.087 | 0.892 | normal |
| chr14 | 5100001 | 5200000 | 0.104 | 0.817 | normal |
| chr14 | 5200001 | 5300000 | 0.078 | 1.071 | normal |
| chr14 | 5300001 | 5400000 | 0.072 | 0.786 | normal |
| chr14 | 5400001 | 5500000 | 0.074 | 0.967 | normal |
| chr14 | 5500001 | 5600000 | 0.145 | 0.900 | normal |
| chr14 | 5600001 | 5700000 | 0.051 | 1.008 | normal |
| chr14 | 5700001 | 5800000 | 0.076 | 0.963 | normal |
| chr14 | 5800001 | 5900000 | 0.121 | 0.907 | normal |
| chr14 | 5900001 | 6000000 | 0.125 | 1.138 | normal |
| chr14 | 6000001 | 6100000 | 0.131 | 0.928 | normal |
| chr14 | 6100001 | 6200000 | 0.087 | 1.033 | normal |
| chr14 | 6200001 | 6300000 | 0.139 | 0.824 | normal |
| chr14 | 6300001 | 6400000 | 0.105 | 0.830 | normal |
| chr14 | 6400001 | 6500000 | 0.107 | 0.774 | normal |
| chr14 | 6500001 | 6600000 | 0.087 | 1.023 | normal |
| chr14 | 6600001 | 6700000 | 0.095 | 1.146 | normal |
| chr14 | 6700001 | 6800000 | 0.072 | 0.831 | normal |
| chr14 | 6800001 | 6900000 | 0.076 | 1.000 | normal |
| chr14 | 6900001 | 7000000 | 0.116 | 0.841 | normal |
| chr14 | 7000001 | 7100000 | 0.144 | 0.907 | normal |
| chr14 | 7100001 | 7200000 | 0.166 | 0.829 | normal |
| chr14 | 7200001 | 7300000 | 0.115 | 0.963 | normal |
| chr14 | 7300001 | 7400000 | 0.163 | 1.168 | normal |

|       |          |          |       |       |        |
|-------|----------|----------|-------|-------|--------|
| chr14 | 7400001  | 7500000  | 0.095 | 1.084 | normal |
| chr14 | 7500001  | 7600000  | 0.110 | 0.958 | normal |
| chr14 | 7600001  | 7700000  | 0.181 | 0.936 | normal |
| chr14 | 7700001  | 7800000  | 0.146 | 0.836 | normal |
| chr14 | 7800001  | 7900000  | 0.057 | 1.282 | normal |
| chr14 | 7900001  | 8000000  | 0.043 | 1.013 | normal |
| chr14 | 8000001  | 8100000  | 0.091 | 1.011 | normal |
| chr14 | 8100001  | 8200000  | 0.116 | 0.656 | normal |
| chr14 | 8200001  | 8300000  | 0.107 | 1.003 | normal |
| chr14 | 8300001  | 8400000  | 0.106 | 0.914 | normal |
| chr14 | 8400001  | 8500000  | 0.144 | 0.828 | normal |
| chr14 | 8500001  | 8600000  | 0.207 | 0.744 | normal |
| chr14 | 8600001  | 8700000  | 0.319 | 0.717 | normal |
| chr14 | 8700001  | 8800000  | 0.193 | 0.693 | normal |
| chr14 | 8800001  | 8900000  | 0.135 | 1.667 | normal |
| chr14 | 8900001  | 9000000  | 0.112 | 1.122 | normal |
| chr14 | 9000001  | 9100000  | 0.150 | 0.565 | normal |
| chr14 | 9100001  | 9200000  | 0.108 | 0.968 | normal |
| chr14 | 9200001  | 9300000  | 0.227 | 0.706 | normal |
| chr14 | 9300001  | 9400000  | 0.083 | 0.965 | normal |
| chr14 | 9400001  | 9500000  | 0.050 | 0.915 | normal |
| chr14 | 9500001  | 9600000  | 0.071 | 0.820 | normal |
| chr14 | 9600001  | 9700000  | 0.044 | 1.012 | normal |
| chr14 | 9700001  | 9800000  | 0.099 | 1.026 | normal |
| chr14 | 9800001  | 9900000  | 0.121 | 0.920 | normal |
| chr14 | 9900001  | 10000000 | 0.064 | 1.062 | normal |
| chr14 | 10000001 | 10100000 | 0.085 | 0.899 | normal |
| chr14 | 10100001 | 10200000 | 0.085 | 1.124 | normal |
| chr14 | 10200001 | 10300000 | 0.119 | 0.777 | normal |
| chr14 | 10300001 | 10400000 | 0.102 | 0.983 | normal |
| chr14 | 10400001 | 10500000 | 0.126 | 0.867 | normal |
| chr14 | 10500001 | 10600000 | 0.108 | 0.916 | normal |
| chr14 | 10600001 | 10700000 | 0.082 | 0.969 | normal |
| chr14 | 10700001 | 10800000 | 0.134 | 1.020 | normal |
| chr14 | 10800001 | 10900000 | 0.139 | 0.885 | normal |
| chr14 | 10900001 | 11000000 | 0.093 | 1.377 | normal |
| chr14 | 11000001 | 11100000 | 0.083 | 1.081 | normal |
| chr14 | 11100001 | 11200000 | 0.047 | 1.069 | normal |
| chr14 | 11200001 | 11300000 | 0.054 | 1.043 | normal |
| chr14 | 11300001 | 11400000 | 0.097 | 0.953 | normal |
| chr14 | 11400001 | 11500000 | 0.072 | 1.039 | normal |
| chr14 | 11500001 | 11600000 | 0.073 | 1.075 | normal |
| chr14 | 11600001 | 11700000 | 0.067 | 1.050 | normal |
| chr14 | 11700001 | 11800000 | 0.101 | 1.011 | normal |

|       |          |          |       |       |        |
|-------|----------|----------|-------|-------|--------|
| chr14 | 11800001 | 11900000 | 0.022 | 1.021 | normal |
| chr14 | 11900001 | 12000000 | 0.090 | 0.902 | normal |
| chr14 | 12000001 | 12100000 | 0.052 | 0.979 | normal |
| chr14 | 12100001 | 12200000 | 0.069 | 1.056 | normal |
| chr14 | 12200001 | 12300000 | 0.085 | 1.056 | normal |
| chr14 | 12300001 | 12400000 | 0.095 | 1.284 | normal |
| chr14 | 12400001 | 12500000 | 0.097 | 1.427 | normal |
| chr14 | 12500001 | 12600000 | 0.119 | 0.843 | normal |
| chr14 | 12600001 | 12700000 | 0.124 | 1.057 | normal |
| chr14 | 12700001 | 12800000 | 0.067 | 0.956 | normal |
| chr14 | 12800001 | 12900000 | 0.060 | 0.965 | normal |
| chr14 | 12900001 | 13000000 | 0.050 | 1.082 | normal |
| chr14 | 13000001 | 13100000 | 0.038 | 1.093 | normal |
| chr14 | 13100001 | 13200000 | 0.053 | 1.387 | normal |
| chr14 | 13200001 | 13300000 | 0.072 | 2.049 | normal |
| chr14 | 13300001 | 13400000 | 0.038 | 1.146 | normal |
| chr14 | 13400001 | 13500000 | 0.058 | 1.116 | normal |
| chr14 | 13500001 | 13600000 | 0.053 | 1.061 | normal |
| chr14 | 13600001 | 13700000 | 0.089 | 0.938 | normal |
| chr14 | 13700001 | 13800000 | 0.125 | 0.670 | normal |
| chr14 | 13800001 | 13900000 | 0.108 | 1.306 | normal |
| chr14 | 13900001 | 14000000 | 0.095 | 1.021 | normal |
| chr14 | 14000001 | 14100000 | 0.105 | 1.541 | normal |
| chr14 | 14100001 | 14200000 | 0.131 | 1.203 | normal |
| chr14 | 14200001 | 14300000 | 0.125 | 0.983 | normal |
| chr14 | 14300001 | 14400000 | 0.087 | 1.125 | normal |
| chr14 | 14400001 | 14500000 | 0.089 | 0.890 | normal |
| chr14 | 14500001 | 14600000 | 0.112 | 0.939 | normal |
| chr14 | 14600001 | 14700000 | 0.080 | 0.980 | normal |
| chr14 | 14700001 | 14800000 | 0.076 | 1.210 | normal |
| chr14 | 14800001 | 14900000 | 0.108 | 0.751 | normal |
| chr14 | 14900001 | 15000000 | 0.093 | 0.687 | normal |
| chr14 | 15000001 | 15100000 | 0.146 | 0.693 | normal |
| chr14 | 15100001 | 15200000 | 0.046 | 0.935 | normal |
| chr14 | 15200001 | 15300000 | 0.075 | 1.000 | normal |
| chr14 | 15300001 | 15400000 | 0.041 | 0.774 | normal |
| chr14 | 15400001 | 15500000 | 0.080 | 0.861 | normal |
| chr14 | 15500001 | 15600000 | 0.111 | 0.807 | normal |
| chr14 | 15600001 | 15700000 | 0.157 | 1.286 | normal |
| chr14 | 15700001 | 15800000 | 0.160 | 1.076 | normal |
| chr14 | 15800001 | 15900000 | 0.050 | 0.888 | normal |
| chr14 | 15900001 | 16000000 | 0.085 | 1.263 | normal |
| chr14 | 16000001 | 16100000 | 0.064 | 1.001 | normal |
| chr14 | 16100001 | 16200000 | 0.093 | 1.000 | normal |

|       |          |          |       |       |        |
|-------|----------|----------|-------|-------|--------|
| chr14 | 16200001 | 16300000 | 0.128 | 0.723 | normal |
| chr14 | 16300001 | 16400000 | 0.080 | 0.840 | normal |
| chr14 | 16400001 | 16500000 | 0.147 | 0.876 | normal |
| chr14 | 16500001 | 16600000 | 0.088 | 0.994 | normal |
| chr14 | 16600001 | 16700000 | 0.081 | 0.861 | normal |
| chr14 | 16700001 | 16800000 | 0.099 | 1.031 | normal |
| chr14 | 16800001 | 16900000 | 0.122 | 1.029 | normal |
| chr14 | 16900001 | 17000000 | 0.113 | 1.127 | normal |
| chr14 | 17000001 | 17100000 | 0.111 | 1.074 | normal |
| chr14 | 17100001 | 17200000 | 0.169 | 1.241 | normal |
| chr14 | 17200001 | 17300000 | 0.121 | 1.136 | normal |
| chr14 | 17300001 | 17400000 | 0.179 | 1.036 | normal |
| chr14 | 17400001 | 17500000 | 0.132 | 0.719 | normal |
| chr14 | 17500001 | 17600000 | 0.260 | 0.611 | normal |
| chr14 | 17600001 | 17700000 | 0.227 | 0.567 | normal |
| chr14 | 17700001 | 17800000 | 0.120 | 0.734 | normal |
| chr14 | 17800001 | 17900000 | 0.090 | 0.999 | normal |
| chr14 | 17900001 | 18000000 | 0.065 | 0.830 | normal |
| chr14 | 18000001 | 18100000 | 0.030 | 0.955 | normal |
| chr14 | 18100001 | 18200000 | 0.029 | 0.943 | normal |
| chr14 | 18200001 | 18300000 | 0.027 | 0.966 | normal |
| chr14 | 18300001 | 18400000 | 0.153 | 0.619 | normal |
| chr14 | 18400001 | 18500000 | 0.123 | 0.824 | normal |
| chr14 | 18500001 | 18600000 | 0.132 | 1.045 | normal |
| chr14 | 18600001 | 18700000 | 0.164 | 0.968 | normal |
| chr14 | 18700001 | 18800000 | 0.204 | 0.963 | normal |
| chr14 | 18800001 | 18900000 | 0.106 | 1.095 | normal |
| chr14 | 18900001 | 19000000 | 0.106 | 1.392 | normal |
| chr14 | 19000001 | 19100000 | 0.143 | 1.153 | normal |
| chr14 | 19100001 | 19200000 | 0.100 | 1.197 | normal |
| chr14 | 19200001 | 19300000 | 0.161 | 1.978 | sig    |
| chr14 | 19300001 | 19400000 | 0.145 | 1.198 | normal |
| chr14 | 19400001 | 19500000 | 0.068 | 1.168 | normal |
| chr14 | 19500001 | 19600000 | 0.081 | 1.099 | normal |
| chr14 | 19600001 | 19700000 | 0.072 | 1.417 | normal |
| chr14 | 19700001 | 19800000 | 0.073 | 1.220 | normal |
| chr14 | 19800001 | 19900000 | 0.147 | 1.506 | normal |
| chr14 | 19900001 | 20000000 | 0.147 | 1.176 | normal |
| chr14 | 20000001 | 20100000 | 0.058 | 1.153 | normal |
| chr14 | 20100001 | 20200000 | 0.057 | 1.202 | normal |
| chr14 | 20200001 | 20300000 | 0.120 | 1.577 | normal |
| chr14 | 20300001 | 20400000 | 0.102 | 0.902 | normal |
| chr14 | 20400001 | 20500000 | 0.077 | 1.560 | normal |
| chr14 | 20500001 | 20600000 | 0.073 | 0.833 | normal |

|       |          |          |       |       |        |
|-------|----------|----------|-------|-------|--------|
| chr14 | 20600001 | 20700000 | 0.102 | 1.104 | normal |
| chr14 | 20700001 | 20800000 | 0.096 | 1.310 | normal |
| chr14 | 20800001 | 20900000 | 0.089 | 1.354 | normal |
| chr14 | 20900001 | 21000000 | 0.115 | 1.046 | normal |
| chr14 | 21000001 | 21100000 | 0.069 | 1.087 | normal |
| chr14 | 21100001 | 21200000 | 0.042 | 1.154 | normal |
| chr14 | 21200001 | 21300000 | 0.095 | 1.188 | normal |
| chr14 | 21300001 | 21400000 | 0.066 | 1.069 | normal |
| chr14 | 21400001 | 21500000 | 0.061 | 1.156 | normal |
| chr14 | 21500001 | 21600000 | 0.098 | 1.336 | normal |
| chr14 | 21600001 | 21700000 | 0.095 | 1.403 | normal |
| chr14 | 21700001 | 21800000 | 0.114 | 1.144 | normal |
| chr14 | 21800001 | 21900000 | 0.031 | 0.994 | normal |
| chr14 | 21900001 | 22000000 | 0.117 | 1.164 | normal |
| chr14 | 22000001 | 22100000 | 0.071 | 1.213 | normal |
| chr14 | 22100001 | 22200000 | 0.078 | 1.212 | normal |
| chr14 | 22200001 | 22300000 | 0.045 | 1.124 | normal |
| chr14 | 22300001 | 22400000 | 0.048 | 1.173 | normal |
| chr14 | 22400001 | 22500000 | 0.061 | 1.209 | normal |
| chr14 | 22500001 | 22600000 | 0.080 | 1.338 | normal |
| chr14 | 22600001 | 22700000 | 0.081 | 1.009 | normal |
| chr14 | 22700001 | 22800000 | 0.079 | 0.956 | normal |
| chr14 | 22800001 | 22900000 | 0.049 | 1.163 | normal |
| chr14 | 22900001 | 23000000 | 0.030 | 1.129 | normal |
| chr14 | 23000001 | 23100000 | 0.051 | 1.083 | normal |
| chr14 | 23100001 | 23200000 | 0.039 | 0.982 | normal |
| chr14 | 23200001 | 23300000 | 0.091 | 2.097 | normal |
| chr14 | 23300001 | 23400000 | 0.054 | 1.363 | normal |
| chr14 | 23400001 | 23500000 | 0.100 | 1.520 | normal |
| chr14 | 23500001 | 23600000 | 0.122 | 1.083 | normal |
| chr14 | 23600001 | 23700000 | 0.153 | 1.385 | normal |
| chr14 | 23700001 | 23800000 | 0.099 | 1.165 | normal |
| chr14 | 23800001 | 23900000 | 0.033 | 0.868 | normal |
| chr14 | 23900001 | 24000000 | 0.067 | 0.931 | normal |
| chr14 | 24000001 | 24100000 | 0.070 | 1.877 | normal |
| chr14 | 24100001 | 24200000 | 0.095 | 2.316 | normal |
| chr14 | 24200001 | 24300000 | 0.138 | 1.667 | normal |
| chr14 | 24300001 | 24400000 | 0.066 | 1.243 | normal |
| chr14 | 24400001 | 24500000 | 0.053 | 1.798 | normal |
| chr14 | 24500001 | 24600000 | 0.040 | 1.579 | normal |
| chr14 | 24600001 | 24700000 | 0.056 | 1.154 | normal |
| chr14 | 24700001 | 24800000 | 0.087 | 1.056 | normal |
| chr14 | 24800001 | 24900000 | 0.094 | 1.201 | normal |
| chr14 | 24900001 | 25000000 | 0.117 | 1.656 | normal |

|       |          |          |       |       |        |
|-------|----------|----------|-------|-------|--------|
| chr14 | 25000001 | 25100000 | 0.089 | 1.155 | normal |
| chr14 | 25100001 | 25200000 | 0.069 | 1.284 | normal |
| chr14 | 25200001 | 25300000 | 0.069 | 1.111 | normal |
| chr14 | 25300001 | 25400000 | 0.100 | 0.970 | normal |
| chr14 | 25400001 | 25500000 | 0.108 | 2.200 | normal |
| chr14 | 25500001 | 25600000 | 0.070 | 1.851 | normal |
| chr14 | 25600001 | 25700000 | 0.085 | 0.917 | normal |
| chr14 | 25700001 | 25800000 | 0.054 | 1.014 | normal |
| chr14 | 25800001 | 25900000 | 0.069 | 0.900 | normal |
| chr14 | 25900001 | 26000000 | 0.061 | 1.129 | normal |
| chr14 | 26000001 | 26100000 | 0.092 | 1.099 | normal |
| chr14 | 26100001 | 26200000 | 0.056 | 1.276 | normal |
| chr14 | 26200001 | 26300000 | 0.039 | 0.923 | normal |
| chr14 | 26300001 | 26400000 | 0.136 | 0.921 | normal |
| chr14 | 26400001 | 26500000 | 0.049 | 1.119 | normal |
| chr14 | 26500001 | 26600000 | 0.053 | 1.461 | normal |
| chr14 | 26600001 | 26700000 | 0.029 | 0.919 | normal |
| chr14 | 26700001 | 26800000 | 0.064 | 0.777 | normal |
| chr14 | 26800001 | 26900000 | 0.054 | 0.893 | normal |
| chr14 | 26900001 | 27000000 | 0.027 | 0.965 | normal |
| chr14 | 27000001 | 27100000 | 0.045 | 0.795 | normal |
| chr14 | 27100001 | 27200000 | 0.068 | 0.562 | normal |
| chr14 | 27200001 | 27300000 | 0.028 | 0.796 | normal |
| chr14 | 27300001 | 27400000 | 0.100 | 0.732 | normal |
| chr14 | 27400001 | 27500000 | 0.057 | 0.816 | normal |
| chr14 | 27500001 | 27600000 | 0.047 | 0.921 | normal |
| chr14 | 27600001 | 27700000 | 0.074 | 1.032 | normal |
| chr14 | 27700001 | 27800000 | 0.115 | 1.138 | normal |
| chr14 | 27800001 | 27900000 | 0.123 | 1.186 | normal |
| chr14 | 27900001 | 28000000 | 0.064 | 1.135 | normal |
| chr14 | 28000001 | 28100000 | 0.111 | 0.766 | normal |
| chr14 | 28100001 | 28200000 | 0.093 | 0.994 | normal |
| chr14 | 28200001 | 28300000 | 0.069 | 1.119 | normal |
| chr14 | 28300001 | 28400000 | 0.061 | 1.388 | normal |
| chr14 | 28400001 | 28500000 | 0.085 | 0.794 | normal |
| chr14 | 28500001 | 28600000 | 0.107 | 0.614 | normal |
| chr14 | 28600001 | 28700000 | 0.021 | 1.029 | normal |
| chr14 | 28700001 | 28800000 | 0.107 | 0.989 | normal |
| chr14 | 28800001 | 28900000 | 0.062 | 1.080 | normal |
| chr14 | 28900001 | 29000000 | 0.059 | 1.037 | normal |
| chr14 | 29000001 | 29100000 | 0.084 | 0.809 | normal |
| chr14 | 29100001 | 29200000 | 0.070 | 0.891 | normal |
| chr14 | 29200001 | 29300000 | 0.056 | 0.952 | normal |
| chr14 | 29300001 | 29400000 | 0.069 | 1.044 | normal |

|       |          |          |       |       |        |
|-------|----------|----------|-------|-------|--------|
| chr14 | 29400001 | 29500000 | 0.044 | 0.851 | normal |
| chr14 | 29500001 | 29600000 | 0.063 | 0.965 | normal |
| chr14 | 29600001 | 29700000 | 0.036 | 0.998 | normal |
| chr14 | 29700001 | 29800000 | 0.044 | 0.917 | normal |
| chr14 | 29800001 | 29900000 | 0.027 | 0.829 | normal |
| chr14 | 29900001 | 30000000 | 0.020 | 0.853 | normal |
| chr14 | 30000001 | 30100000 | 0.057 | 0.804 | normal |
| chr14 | 30100001 | 30200000 | 0.051 | 1.072 | normal |
| chr14 | 30200001 | 30300000 | 0.043 | 0.988 | normal |
| chr14 | 30300001 | 30400000 | 0.037 | 1.088 | normal |
| chr14 | 30400001 | 30500000 | 0.016 | 0.941 | normal |
| chr14 | 30500001 | 30600000 | 0.057 | 0.960 | normal |
| chr14 | 30600001 | 30700000 | 0.048 | 0.862 | normal |
| chr14 | 30700001 | 30800000 | 0.033 | 0.981 | normal |
| chr14 | 30800001 | 30900000 | 0.042 | 0.865 | normal |
| chr14 | 30900001 | 31000000 | 0.088 | 0.767 | normal |
| chr14 | 31000001 | 31100000 | 0.043 | 1.022 | normal |
| chr14 | 31100001 | 31200000 | 0.033 | 1.017 | normal |
| chr14 | 31200001 | 31300000 | 0.043 | 1.309 | normal |
| chr14 | 31300001 | 31400000 | 0.092 | 0.955 | normal |
| chr14 | 31400001 | 31500000 | 0.054 | 1.050 | normal |
| chr14 | 31500001 | 31600000 | 0.111 | 0.758 | normal |
| chr14 | 31600001 | 31700000 | 0.067 | 0.957 | normal |
| chr14 | 31700001 | 31800000 | 0.071 | 1.071 | normal |
| chr14 | 31800001 | 31900000 | 0.129 | 0.711 | normal |
| chr14 | 31900001 | 32000000 | 0.057 | 0.982 | normal |
| chr14 | 32000001 | 32100000 | 0.044 | 0.919 | normal |
| chr14 | 32100001 | 32200000 | 0.030 | 1.034 | normal |
| chr14 | 32200001 | 32300000 | 0.056 | 1.212 | normal |
| chr14 | 32300001 | 32400000 | 0.119 | 0.876 | normal |
| chr14 | 32400001 | 32500000 | 0.082 | 1.469 | normal |
| chr14 | 32500001 | 32600000 | 0.082 | 1.553 | normal |
| chr14 | 32600001 | 32700000 | 0.076 | 1.878 | normal |
| chr14 | 32700001 | 32800000 | 0.037 | 0.995 | normal |
| chr14 | 32800001 | 32900000 | 0.066 | 0.789 | normal |
| chr14 | 32900001 | 33000000 | 0.024 | 0.935 | normal |
| chr14 | 33000001 | 33100000 | 0.047 | 0.984 | normal |
| chr14 | 33100001 | 33200000 | 0.065 | 0.965 | normal |
| chr14 | 33200001 | 33300000 | 0.048 | 1.030 | normal |
| chr14 | 33300001 | 33400000 | 0.053 | 0.800 | normal |
| chr14 | 33400001 | 33500000 | 0.029 | 1.038 | normal |
| chr14 | 33500001 | 33600000 | 0.034 | 0.919 | normal |
| chr14 | 33600001 | 33700000 | 0.069 | 1.068 | normal |
| chr14 | 33700001 | 33800000 | 0.095 | 1.097 | normal |

|       |          |          |       |       |        |
|-------|----------|----------|-------|-------|--------|
| chr14 | 33800001 | 33900000 | 0.058 | 1.001 | normal |
| chr14 | 33900001 | 34000000 | 0.053 | 1.081 | normal |
| chr14 | 34000001 | 34100000 | 0.143 | 0.727 | normal |
| chr14 | 34100001 | 34200000 | 0.076 | 0.903 | normal |
| chr14 | 34200001 | 34300000 | 0.046 | 0.858 | normal |
| chr14 | 34300001 | 34400000 | 0.067 | 0.825 | normal |
| chr14 | 34400001 | 34500000 | 0.074 | 1.616 | normal |
| chr14 | 34500001 | 34600000 | 0.050 | 1.175 | normal |
| chr14 | 34600001 | 34700000 | 0.033 | 1.177 | normal |
| chr14 | 34700001 | 34800000 | 0.027 | 1.285 | normal |
| chr14 | 34800001 | 34900000 | 0.049 | 1.186 | normal |
| chr14 | 34900001 | 35000000 | 0.101 | 1.188 | normal |
| chr14 | 35000001 | 35100000 | 0.060 | 1.028 | normal |
| chr14 | 35100001 | 35200000 | 0.075 | 1.231 | normal |
| chr14 | 35200001 | 35300000 | 0.071 | 0.867 | normal |
| chr14 | 35300001 | 35400000 | 0.134 | 0.817 | normal |
| chr14 | 35400001 | 35500000 | 0.093 | 1.002 | normal |
| chr14 | 35500001 | 35600000 | 0.122 | 0.938 | normal |
| chr14 | 35600001 | 35700000 | 0.076 | 1.208 | normal |
| chr14 | 35700001 | 35800000 | 0.083 | 0.966 | normal |
| chr14 | 35800001 | 35900000 | 0.066 | 1.046 | normal |
| chr14 | 35900001 | 36000000 | 0.108 | 0.699 | normal |
| chr14 | 36000001 | 36100000 | 0.062 | 1.051 | normal |
| chr14 | 36100001 | 36200000 | 0.049 | 1.240 | normal |
| chr14 | 36200001 | 36300000 | 0.056 | 1.039 | normal |
| chr14 | 36300001 | 36400000 | 0.022 | 0.932 | normal |
| chr14 | 36400001 | 36500000 | 0.087 | 0.777 | normal |
| chr14 | 36500001 | 36600000 | 0.112 | 0.811 | normal |
| chr14 | 36600001 | 36700000 | 0.055 | 0.847 | normal |
| chr14 | 36700001 | 36800000 | 0.032 | 0.864 | normal |
| chr14 | 36800001 | 36900000 | 0.053 | 0.952 | normal |
| chr14 | 36900001 | 37000000 | 0.012 | 1.023 | normal |
| chr14 | 37000001 | 37100000 | 0.110 | 0.716 | normal |
| chr14 | 37100001 | 37200000 | 0.110 | 1.583 | normal |
| chr14 | 37200001 | 37300000 | 0.047 | 1.155 | normal |
| chr14 | 37300001 | 37400000 | 0.055 | 1.517 | normal |
| chr14 | 37400001 | 37500000 | 0.052 | 0.816 | normal |
| chr14 | 37500001 | 37600000 | 0.067 | 1.029 | normal |
| chr14 | 37600001 | 37700000 | 0.045 | 0.851 | normal |
| chr14 | 37700001 | 37800000 | 0.057 | 0.824 | normal |
| chr14 | 37800001 | 37900000 | 0.049 | 0.945 | normal |
| chr14 | 37900001 | 38000000 | 0.056 | 0.859 | normal |
| chr14 | 38000001 | 38100000 | 0.117 | 0.829 | normal |
| chr14 | 38100001 | 38200000 | 0.060 | 0.806 | normal |



|       |          |          |       |       |        |
|-------|----------|----------|-------|-------|--------|
| chr14 | 38200001 | 38300000 | 0.024 | 1.024 | normal |
| chr14 | 38300001 | 38400000 | 0.035 | 1.077 | normal |
| chr14 | 38400001 | 38500000 | 0.081 | 0.996 | normal |
| chr14 | 38500001 | 38600000 | 0.099 | 0.918 | normal |
| chr14 | 38600001 | 38700000 | 0.051 | 1.017 | normal |
| chr14 | 38700001 | 38800000 | 0.073 | 0.896 | normal |
| chr14 | 38800001 | 38900000 | 0.046 | 1.153 | normal |
| chr14 | 38900001 | 39000000 | 0.050 | 1.120 | normal |
| chr14 | 39000001 | 39100000 | 0.045 | 1.115 | normal |
| chr14 | 39100001 | 39200000 | 0.073 | 1.039 | normal |
| chr02 | 1        | 100000   | 0.020 | 1.041 | normal |
| chr02 | 100001   | 200000   | 0.047 | 0.944 | normal |
| chr02 | 200001   | 300000   | 0.057 | 1.190 | normal |
| chr02 | 300001   | 400000   | 0.038 | 1.032 | normal |
| chr02 | 400001   | 500000   | 0.029 | 0.958 | normal |
| chr02 | 500001   | 600000   | 0.063 | 1.121 | normal |
| chr02 | 600001   | 700000   | 0.075 | 1.061 | normal |
| chr02 | 700001   | 800000   | 0.035 | 1.014 | normal |
| chr02 | 800001   | 900000   | 0.061 | 0.861 | normal |
| chr02 | 900001   | 1000000  | 0.054 | 0.955 | normal |
| chr02 | 1000001  | 1100000  | 0.042 | 0.930 | normal |
| chr02 | 1100001  | 1200000  | 0.034 | 0.860 | normal |
| chr02 | 1200001  | 1300000  | 0.040 | 0.920 | normal |
| chr02 | 1300001  | 1400000  | 0.090 | 0.769 | normal |
| chr02 | 1400001  | 1500000  | 0.062 | 1.113 | normal |
| chr02 | 1500001  | 1600000  | 0.052 | 0.997 | normal |
| chr02 | 1600001  | 1700000  | 0.040 | 1.283 | normal |
| chr02 | 1700001  | 1800000  | 0.047 | 1.005 | normal |
| chr02 | 1800001  | 1900000  | 0.045 | 1.078 | normal |
| chr02 | 1900001  | 2000000  | 0.127 | 0.833 | normal |
| chr02 | 2000001  | 2100000  | 0.141 | 0.641 | normal |
| chr02 | 2100001  | 2200000  | 0.049 | 0.898 | normal |
| chr02 | 2200001  | 2300000  | 0.044 | 0.950 | normal |
| chr02 | 2300001  | 2400000  | 0.027 | 0.990 | normal |
| chr02 | 2400001  | 2500000  | 0.069 | 1.186 | normal |
| chr02 | 2500001  | 2600000  | 0.039 | 0.978 | normal |
| chr02 | 2600001  | 2700000  | 0.031 | 0.870 | normal |
| chr02 | 2700001  | 2800000  | 0.028 | 0.853 | normal |
| chr02 | 2800001  | 2900000  | 0.036 | 0.950 | normal |
| chr02 | 2900001  | 3000000  | 0.061 | 1.222 | normal |
| chr02 | 3000001  | 3100000  | 0.049 | 0.974 | normal |
| chr02 | 3100001  | 3200000  | 0.138 | 1.175 | normal |
| chr02 | 3200001  | 3300000  | 0.069 | 1.171 | normal |
| chr02 | 3300001  | 3400000  | 0.038 | 1.023 | normal |

|       |         |         |       |       |        |
|-------|---------|---------|-------|-------|--------|
| chr02 | 3400001 | 3500000 | 0.041 | 0.989 | normal |
| chr02 | 3500001 | 3600000 | 0.027 | 1.049 | normal |
| chr02 | 3600001 | 3700000 | 0.034 | 1.068 | normal |
| chr02 | 3700001 | 3800000 | 0.032 | 1.067 | normal |
| chr02 | 3800001 | 3900000 | 0.058 | 1.077 | normal |
| chr02 | 3900001 | 4000000 | 0.111 | 1.057 | normal |
| chr02 | 4000001 | 4100000 | 0.081 | 1.134 | normal |
| chr02 | 4100001 | 4200000 | 0.154 | 1.221 | normal |
| chr02 | 4200001 | 4300000 | 0.199 | 1.124 | normal |
| chr02 | 4300001 | 4400000 | 0.140 | 1.128 | normal |
| chr02 | 4400001 | 4500000 | 0.069 | 1.131 | normal |
| chr02 | 4500001 | 4600000 | 0.056 | 1.226 | normal |
| chr02 | 4600001 | 4700000 | 0.120 | 1.288 | normal |
| chr02 | 4700001 | 4800000 | 0.107 | 0.963 | normal |
| chr02 | 4800001 | 4900000 | 0.105 | 1.445 | normal |
| chr02 | 4900001 | 5000000 | 0.344 | 0.560 | normal |
| chr02 | 5000001 | 5100000 | 0.067 | 1.128 | normal |
| chr02 | 5100001 | 5200000 | 0.174 | 1.135 | normal |
| chr02 | 5200001 | 5300000 | 0.186 | 1.241 | normal |
| chr02 | 5300001 | 5400000 | 0.213 | 1.023 | normal |
| chr02 | 5400001 | 5500000 | 0.212 | 1.300 | normal |
| chr02 | 5500001 | 5600000 | 0.158 | 0.823 | normal |
| chr02 | 5600001 | 5700000 | 0.106 | 1.068 | normal |
| chr02 | 5700001 | 5800000 | 0.288 | 0.712 | normal |
| chr02 | 5800001 | 5900000 | 0.240 | 0.843 | normal |
| chr02 | 5900001 | 6000000 | 0.053 | 1.015 | normal |
| chr02 | 6000001 | 6100000 | 0.161 | 0.945 | normal |
| chr02 | 6100001 | 6200000 | 0.180 | 0.769 | normal |
| chr02 | 6200001 | 6300000 | 0.131 | 1.070 | normal |
| chr02 | 6300001 | 6400000 | 0.141 | 1.121 | normal |
| chr02 | 6400001 | 6500000 | 0.128 | 1.901 | normal |
| chr02 | 6500001 | 6600000 | 0.059 | 1.089 | normal |
| chr02 | 6600001 | 6700000 | 0.066 | 1.105 | normal |
| chr02 | 6700001 | 6800000 | 0.103 | 1.274 | normal |
| chr02 | 6800001 | 6900000 | 0.111 | 1.925 | normal |
| chr02 | 6900001 | 7000000 | 0.117 | 0.957 | normal |
| chr02 | 7000001 | 7100000 | 0.077 | 0.963 | normal |
| chr02 | 7100001 | 7200000 | 0.185 | 1.885 | sig    |
| chr02 | 7200001 | 7300000 | 0.096 | 1.107 | normal |
| chr02 | 7300001 | 7400000 | 0.062 | 1.229 | normal |
| chr02 | 7400001 | 7500000 | 0.096 | 0.862 | normal |
| chr02 | 7500001 | 7600000 | 0.097 | 1.107 | normal |
| chr02 | 7600001 | 7700000 | 0.097 | 0.936 | normal |
| chr02 | 7700001 | 7800000 | 0.057 | 0.975 | normal |

|       |          |          |       |       |        |
|-------|----------|----------|-------|-------|--------|
| chr02 | 7800001  | 7900000  | 0.137 | 0.960 | normal |
| chr02 | 7900001  | 8000000  | 0.099 | 1.050 | normal |
| chr02 | 8000001  | 8100000  | 0.099 | 0.841 | normal |
| chr02 | 8100001  | 8200000  | 0.118 | 0.699 | normal |
| chr02 | 8200001  | 8300000  | 0.063 | 1.515 | normal |
| chr02 | 8300001  | 8400000  | 0.117 | 0.772 | normal |
| chr02 | 8400001  | 8500000  | 0.033 | 1.199 | normal |
| chr02 | 8500001  | 8600000  | 0.059 | 1.011 | normal |
| chr02 | 8600001  | 8700000  | 0.144 | 1.528 | normal |
| chr02 | 8700001  | 8800000  | 0.040 | 0.919 | normal |
| chr02 | 8800001  | 8900000  | 0.046 | 1.010 | normal |
| chr02 | 8900001  | 9000000  | 0.048 | 1.119 | normal |
| chr02 | 9000001  | 9100000  | 0.090 | 1.025 | normal |
| chr02 | 9100001  | 9200000  | 0.086 | 1.051 | normal |
| chr02 | 9200001  | 9300000  | 0.045 | 1.122 | normal |
| chr02 | 9300001  | 9400000  | 0.085 | 0.954 | normal |
| chr02 | 9400001  | 9500000  | 0.074 | 1.044 | normal |
| chr02 | 9500001  | 9600000  | 0.152 | 1.107 | normal |
| chr02 | 9600001  | 9700000  | 0.187 | 0.707 | normal |
| chr02 | 9700001  | 9800000  | 0.269 | 0.370 | normal |
| chr02 | 9800001  | 9900000  | 0.192 | 0.435 | normal |
| chr02 | 9900001  | 10000000 | 0.122 | 0.864 | normal |
| chr02 | 10000001 | 10100000 | 0.048 | 0.962 | normal |
| chr02 | 10100001 | 10200000 | 0.066 | 1.407 | normal |
| chr02 | 10200001 | 10300000 | 0.111 | 0.947 | normal |
| chr02 | 10300001 | 10400000 | 0.091 | 1.140 | normal |
| chr02 | 10400001 | 10500000 | 0.071 | 0.804 | normal |
| chr02 | 10500001 | 10600000 | 0.083 | 1.090 | normal |
| chr02 | 10600001 | 10700000 | 0.074 | 1.399 | normal |
| chr02 | 10700001 | 10800000 | 0.084 | 1.300 | normal |
| chr02 | 10800001 | 10900000 | 0.094 | 0.769 | normal |
| chr02 | 10900001 | 11000000 | 0.061 | 1.003 | normal |
| chr02 | 11000001 | 11100000 | 0.123 | 0.756 | normal |
| chr02 | 11100001 | 11200000 | 0.055 | 0.973 | normal |
| chr02 | 11200001 | 11300000 | 0.102 | 0.719 | normal |
| chr02 | 11300001 | 11400000 | 0.086 | 1.418 | normal |
| chr02 | 11400001 | 11500000 | 0.104 | 0.903 | normal |
| chr02 | 11500001 | 11600000 | 0.055 | 0.797 | normal |
| chr02 | 11600001 | 11700000 | 0.026 | 0.973 | normal |
| chr02 | 11700001 | 11800000 | 0.036 | 1.012 | normal |
| chr02 | 11800001 | 11900000 | 0.023 | 0.994 | normal |
| chr02 | 11900001 | 12000000 | 0.025 | 1.098 | normal |
| chr02 | 12000001 | 12100000 | 0.087 | 0.768 | normal |
| chr02 | 12100001 | 12200000 | 0.080 | 0.829 | normal |

|       |          |          |       |       |        |
|-------|----------|----------|-------|-------|--------|
| chr02 | 12200001 | 12300000 | 0.082 | 0.919 | normal |
| chr02 | 12300001 | 12400000 | 0.110 | 0.931 | normal |
| chr02 | 12400001 | 12500000 | 0.106 | 0.846 | normal |
| chr02 | 12500001 | 12600000 | 0.104 | 0.939 | normal |
| chr02 | 12600001 | 12700000 | 0.065 | 0.945 | normal |
| chr02 | 12700001 | 12800000 | 0.086 | 1.249 | normal |
| chr02 | 12800001 | 12900000 | 0.096 | 1.341 | normal |
| chr02 | 12900001 | 13000000 | 0.068 | 1.041 | normal |
| chr02 | 13000001 | 13100000 | 0.052 | 1.200 | normal |
| chr02 | 13100001 | 13200000 | 0.055 | 1.015 | normal |
| chr02 | 13200001 | 13300000 | 0.057 | 0.984 | normal |
| chr02 | 13300001 | 13400000 | 0.057 | 1.032 | normal |
| chr02 | 13400001 | 13500000 | 0.044 | 1.625 | normal |
| chr02 | 13500001 | 13600000 | 0.039 | 1.559 | normal |
| chr02 | 13600001 | 13700000 | 0.071 | 0.850 | normal |
| chr02 | 13700001 | 13800000 | 0.010 | 0.987 | normal |
| chr02 | 13800001 | 13900000 | 0.025 | 1.032 | normal |
| chr02 | 13900001 | 14000000 | 0.054 | 0.970 | normal |
| chr02 | 14000001 | 14100000 | 0.032 | 1.005 | normal |
| chr02 | 14100001 | 14200000 | 0.023 | 0.966 | normal |
| chr02 | 14200001 | 14300000 | 0.055 | 0.875 | normal |
| chr02 | 14300001 | 14400000 | 0.048 | 0.936 | normal |
| chr02 | 14400001 | 14500000 | 0.035 | 0.893 | normal |
| chr02 | 14500001 | 14600000 | 0.050 | 1.403 | normal |
| chr02 | 14600001 | 14700000 | 0.048 | 1.187 | normal |
| chr02 | 14700001 | 14800000 | 0.046 | 1.076 | normal |
| chr02 | 14800001 | 14900000 | 0.063 | 0.973 | normal |
| chr02 | 14900001 | 15000000 | 0.078 | 1.049 | normal |
| chr02 | 15000001 | 15100000 | 0.119 | 0.909 | normal |
| chr02 | 15100001 | 15200000 | 0.077 | 0.969 | normal |
| chr02 | 15200001 | 15300000 | 0.132 | 0.762 | normal |
| chr02 | 15300001 | 15400000 | 0.142 | 0.745 | normal |
| chr02 | 15400001 | 15500000 | 0.131 | 0.735 | normal |
| chr02 | 15500001 | 15600000 | 0.144 | 0.704 | normal |
| chr02 | 15600001 | 15700000 | 0.085 | 1.018 | normal |
| chr02 | 15700001 | 15800000 | 0.102 | 1.165 | normal |
| chr02 | 15800001 | 15900000 | 0.148 | 1.593 | normal |
| chr02 | 15900001 | 16000000 | 0.104 | 0.706 | normal |
| chr02 | 16000001 | 16100000 | 0.049 | 0.966 | normal |
| chr02 | 16100001 | 16200000 | 0.034 | 0.998 | normal |
| chr02 | 16200001 | 16300000 | 0.062 | 0.835 | normal |
| chr02 | 16300001 | 16400000 | 0.125 | 1.508 | normal |
| chr02 | 16400001 | 16500000 | 0.055 | 1.102 | normal |
| chr02 | 16500001 | 16600000 | 0.035 | 1.021 | normal |

|       |          |          |       |       |        |
|-------|----------|----------|-------|-------|--------|
| chr02 | 16600001 | 16700000 | 0.121 | 0.877 | normal |
| chr02 | 16700001 | 16800000 | 0.037 | 1.010 | normal |
| chr02 | 16800001 | 16900000 | 0.057 | 1.089 | normal |
| chr02 | 16900001 | 17000000 | 0.065 | 1.062 | normal |
| chr02 | 17000001 | 17100000 | 0.058 | 1.027 | normal |
| chr02 | 17100001 | 17200000 | 0.081 | 0.833 | normal |
| chr02 | 17200001 | 17300000 | 0.147 | 0.678 | normal |
| chr02 | 17300001 | 17400000 | 0.065 | 0.861 | normal |
| chr02 | 17400001 | 17500000 | 0.093 | 1.762 | normal |
| chr02 | 17500001 | 17600000 | 0.051 | 1.134 | normal |
| chr02 | 17600001 | 17700000 | 0.070 | 1.018 | normal |
| chr02 | 17700001 | 17800000 | 0.055 | 0.915 | normal |
| chr02 | 17800001 | 17900000 | 0.067 | 1.235 | normal |
| chr02 | 17900001 | 18000000 | 0.100 | 0.704 | normal |
| chr02 | 18000001 | 18100000 | 0.066 | 1.312 | normal |
| chr02 | 18100001 | 18200000 | 0.048 | 1.272 | normal |
| chr02 | 18200001 | 18300000 | 0.081 | 1.103 | normal |
| chr02 | 18300001 | 18400000 | 0.079 | 0.851 | normal |
| chr02 | 18400001 | 18500000 | 0.105 | 0.671 | normal |
| chr02 | 18500001 | 18600000 | 0.124 | 0.595 | normal |
| chr02 | 18600001 | 18700000 | 0.123 | 0.613 | normal |
| chr02 | 18700001 | 18800000 | 0.119 | 0.640 | normal |
| chr02 | 18800001 | 18900000 | 0.088 | 0.830 | normal |
| chr02 | 18900001 | 19000000 | 0.123 | 0.586 | normal |
| chr02 | 19000001 | 19100000 | 0.114 | 0.673 | normal |
| chr02 | 19100001 | 19200000 | 0.111 | 0.742 | normal |
| chr02 | 19200001 | 19300000 | 0.127 | 0.589 | normal |
| chr02 | 19300001 | 19400000 | 0.123 | 0.630 | normal |
| chr02 | 19400001 | 19500000 | 0.128 | 0.583 | normal |
| chr02 | 19500001 | 19600000 | 0.122 | 0.650 | normal |
| chr02 | 19600001 | 19700000 | 0.130 | 0.608 | normal |
| chr02 | 19700001 | 19800000 | 0.135 | 0.526 | normal |
| chr02 | 19800001 | 19900000 | 0.102 | 0.661 | normal |
| chr02 | 19900001 | 20000000 | 0.050 | 1.183 | normal |
| chr02 | 20000001 | 20100000 | 0.046 | 1.185 | normal |
| chr02 | 20100001 | 20200000 | 0.040 | 1.162 | normal |
| chr02 | 20200001 | 20300000 | 0.033 | 1.401 | normal |
| chr02 | 20300001 | 20400000 | 0.047 | 1.079 | normal |
| chr02 | 20400001 | 20500000 | 0.024 | 1.179 | normal |
| chr02 | 20500001 | 20600000 | 0.052 | 1.159 | normal |
| chr02 | 20600001 | 20700000 | 0.052 | 1.058 | normal |
| chr02 | 20700001 | 20800000 | 0.047 | 1.250 | normal |
| chr02 | 20800001 | 20900000 | 0.052 | 0.885 | normal |
| chr02 | 20900001 | 21000000 | 0.048 | 1.334 | normal |

|       |          |          |       |       |        |
|-------|----------|----------|-------|-------|--------|
| chr02 | 21000001 | 21100000 | 0.042 | 0.946 | normal |
| chr02 | 21100001 | 21200000 | 0.056 | 1.066 | normal |
| chr02 | 21200001 | 21300000 | 0.067 | 1.405 | normal |
| chr02 | 21300001 | 21400000 | 0.055 | 1.181 | normal |
| chr02 | 21400001 | 21500000 | 0.098 | 1.097 | normal |
| chr02 | 21500001 | 21600000 | 0.069 | 1.334 | normal |
| chr02 | 21600001 | 21700000 | 0.038 | 1.204 | normal |
| chr02 | 21700001 | 21800000 | 0.067 | 1.247 | normal |
| chr02 | 21800001 | 21900000 | 0.048 | 1.168 | normal |
| chr02 | 21900001 | 22000000 | 0.064 | 1.206 | normal |
| chr02 | 22000001 | 22100000 | 0.061 | 1.023 | normal |
| chr02 | 22100001 | 22200000 | 0.077 | 0.979 | normal |
| chr02 | 22200001 | 22300000 | 0.062 | 1.041 | normal |
| chr02 | 22300001 | 22400000 | 0.148 | 1.113 | normal |
| chr02 | 22400001 | 22500000 | 0.126 | 1.078 | normal |
| chr02 | 22500001 | 22600000 | 0.108 | 1.017 | normal |
| chr02 | 22600001 | 22700000 | 0.089 | 1.083 | normal |
| chr02 | 22700001 | 22800000 | 0.038 | 1.104 | normal |
| chr02 | 22800001 | 22900000 | 0.041 | 1.043 | normal |
| chr02 | 22900001 | 23000000 | 0.086 | 1.382 | normal |
| chr02 | 23000001 | 23100000 | 0.104 | 1.390 | normal |
| chr02 | 23100001 | 23200000 | 0.084 | 0.990 | normal |
| chr02 | 23200001 | 23300000 | 0.071 | 1.247 | normal |
| chr02 | 23300001 | 23400000 | 0.067 | 1.220 | normal |
| chr02 | 23400001 | 23500000 | 0.014 | 1.001 | normal |
| chr02 | 23500001 | 23600000 | 0.023 | 0.926 | normal |
| chr02 | 23600001 | 23700000 | 0.051 | 0.546 | normal |
| chr02 | 23700001 | 23800000 | 0.033 | 0.525 | normal |
| chr02 | 23800001 | 23900000 | 0.023 | 1.101 | normal |
| chr02 | 23900001 | 24000000 | 0.026 | 1.206 | normal |
| chr02 | 24000001 | 24100000 | 0.031 | 1.066 | normal |
| chr02 | 24100001 | 24200000 | 0.029 | 1.032 | normal |
| chr02 | 24200001 | 24300000 | 0.034 | 0.981 | normal |
| chr02 | 24300001 | 24400000 | 0.044 | 1.044 | normal |
| chr02 | 24400001 | 24500000 | 0.031 | 1.619 | normal |
| chr02 | 24500001 | 24600000 | 0.011 | 1.224 | normal |
| chr02 | 24600001 | 24700000 | 0.025 | 1.232 | normal |
| chr02 | 24700001 | 24800000 | 0.051 | 1.107 | normal |
| chr02 | 24800001 | 24900000 | 0.060 | 1.466 | normal |
| chr02 | 24900001 | 25000000 | 0.047 | 1.014 | normal |
| chr02 | 25000001 | 25100000 | 0.060 | 0.998 | normal |
| chr02 | 25100001 | 25200000 | 0.079 | 0.987 | normal |
| chr02 | 25200001 | 25300000 | 0.065 | 0.923 | normal |
| chr02 | 25300001 | 25400000 | 0.086 | 1.054 | normal |

|       |          |          |       |       |        |
|-------|----------|----------|-------|-------|--------|
| chr02 | 25400001 | 25500000 | 0.104 | 1.089 | normal |
| chr02 | 25500001 | 25600000 | 0.043 | 1.070 | normal |
| chr02 | 25600001 | 25700000 | 0.052 | 1.030 | normal |
| chr02 | 25700001 | 25800000 | 0.087 | 1.484 | normal |
| chr02 | 25800001 | 25900000 | 0.142 | 1.239 | normal |
| chr02 | 25900001 | 26000000 | 0.040 | 1.091 | normal |
| chr02 | 26000001 | 26100000 | 0.073 | 1.529 | normal |
| chr02 | 26100001 | 26200000 | 0.042 | 1.381 | normal |
| chr02 | 26200001 | 26300000 | 0.047 | 1.363 | normal |
| chr02 | 26300001 | 26400000 | 0.030 | 1.012 | normal |
| chr02 | 26400001 | 26500000 | 0.108 | 1.984 | normal |
| chr02 | 26500001 | 26600000 | 0.054 | 1.117 | normal |
| chr02 | 26600001 | 26700000 | 0.050 | 0.959 | normal |
| chr02 | 26700001 | 26800000 | 0.027 | 0.998 | normal |
| chr02 | 26800001 | 26900000 | 0.079 | 2.068 | normal |
| chr02 | 26900001 | 27000000 | 0.051 | 1.411 | normal |
| chr02 | 27000001 | 27100000 | 0.103 | 0.971 | normal |
| chr02 | 27100001 | 27200000 | 0.117 | 1.037 | normal |
| chr02 | 27200001 | 27300000 | 0.054 | 1.175 | normal |
| chr02 | 27300001 | 27400000 | 0.043 | 1.071 | normal |
| chr02 | 27400001 | 27500000 | 0.050 | 1.332 | normal |
| chr02 | 27500001 | 27600000 | 0.027 | 1.132 | normal |
| chr02 | 27600001 | 27700000 | 0.045 | 0.963 | normal |
| chr02 | 27700001 | 27800000 | 0.049 | 1.100 | normal |
| chr02 | 27800001 | 27900000 | 0.031 | 1.151 | normal |
| chr02 | 27900001 | 28000000 | 0.058 | 1.210 | normal |
| chr02 | 28000001 | 28100000 | 0.047 | 1.160 | normal |
| chr02 | 28100001 | 28200000 | 0.030 | 1.019 | normal |
| chr02 | 28200001 | 28300000 | 0.075 | 1.733 | normal |
| chr02 | 28300001 | 28400000 | 0.056 | 1.243 | normal |
| chr02 | 28400001 | 28500000 | 0.043 | 1.110 | normal |
| chr02 | 28500001 | 28600000 | 0.028 | 1.011 | normal |
| chr02 | 28600001 | 28700000 | 0.124 | 0.641 | normal |
| chr02 | 28700001 | 28800000 | 0.091 | 0.831 | normal |
| chr02 | 28800001 | 28900000 | 0.045 | 1.028 | normal |
| chr02 | 28900001 | 29000000 | 0.157 | 0.458 | normal |
| chr02 | 29000001 | 29100000 | 0.047 | 1.003 | normal |
| chr02 | 29100001 | 29200000 | 0.023 | 1.073 | normal |
| chr02 | 29200001 | 29300000 | 0.019 | 1.200 | normal |
| chr02 | 29300001 | 29400000 | 0.031 | 1.069 | normal |
| chr02 | 29400001 | 29500000 | 0.065 | 0.948 | normal |
| chr02 | 29500001 | 29600000 | 0.072 | 1.037 | normal |
| chr02 | 29600001 | 29700000 | 0.061 | 1.223 | normal |
| chr02 | 29700001 | 29800000 | 0.036 | 1.169 | normal |

|       |          |          |       |       |        |
|-------|----------|----------|-------|-------|--------|
| chr02 | 29800001 | 29900000 | 0.027 | 1.085 | normal |
| chr02 | 29900001 | 30000000 | 0.034 | 1.119 | normal |
| chr02 | 30000001 | 30100000 | 0.070 | 1.832 | normal |
| chr02 | 30100001 | 30200000 | 0.098 | 2.051 | normal |
| chr02 | 30200001 | 30300000 | 0.046 | 1.221 | normal |
| chr02 | 30300001 | 30400000 | 0.096 | 1.206 | normal |
| chr02 | 30400001 | 30500000 | 0.025 | 0.945 | normal |
| chr02 | 30500001 | 30600000 | 0.056 | 1.156 | normal |
| chr02 | 30600001 | 30700000 | 0.057 | 1.207 | normal |
| chr02 | 30700001 | 30800000 | 0.027 | 1.139 | normal |
| chr02 | 30800001 | 30900000 | 0.086 | 1.235 | normal |
| chr02 | 30900001 | 31000000 | 0.076 | 1.065 | normal |
| chr02 | 31000001 | 31100000 | 0.084 | 1.221 | normal |
| chr02 | 31100001 | 31200000 | 0.057 | 1.164 | normal |
| chr02 | 31200001 | 31300000 | 0.044 | 1.116 | normal |
| chr02 | 31300001 | 31400000 | 0.046 | 1.018 | normal |
| chr02 | 31400001 | 31500000 | 0.066 | 0.755 | normal |
| chr02 | 31500001 | 31600000 | 0.073 | 0.847 | normal |
| chr02 | 31600001 | 31700000 | 0.040 | 1.001 | normal |
| chr02 | 31700001 | 31800000 | 0.074 | 0.992 | normal |
| chr02 | 31800001 | 31900000 | 0.048 | 1.229 | normal |
| chr02 | 31900001 | 32000000 | 0.065 | 1.126 | normal |
| chr02 | 32000001 | 32100000 | 0.069 | 0.799 | normal |
| chr02 | 32100001 | 32200000 | 0.046 | 1.156 | normal |
| chr02 | 32200001 | 32300000 | 0.039 | 1.093 | normal |
| chr02 | 32300001 | 32400000 | 0.059 | 1.002 | normal |
| chr02 | 32400001 | 32500000 | 0.041 | 0.972 | normal |
| chr02 | 32500001 | 32600000 | 0.096 | 1.231 | normal |
| chr02 | 32600001 | 32700000 | 0.056 | 1.685 | normal |
| chr02 | 32700001 | 32800000 | 0.067 | 1.575 | normal |
| chr02 | 32800001 | 32900000 | 0.065 | 1.068 | normal |
| chr02 | 32900001 | 33000000 | 0.097 | 0.398 | normal |
| chr02 | 33000001 | 33100000 | 0.104 | 0.430 | normal |
| chr02 | 33100001 | 33200000 | 0.094 | 0.545 | normal |
| chr02 | 33200001 | 33300000 | 0.027 | 1.079 | normal |
| chr02 | 33300001 | 33400000 | 0.071 | 0.955 | normal |
| chr02 | 33400001 | 33500000 | 0.047 | 0.988 | normal |
| chr02 | 33500001 | 33600000 | 0.109 | 1.108 | normal |
| chr02 | 33600001 | 33700000 | 0.058 | 0.874 | normal |
| chr02 | 33700001 | 33800000 | 0.076 | 1.057 | normal |
| chr02 | 33800001 | 33900000 | 0.054 | 1.391 | normal |
| chr02 | 33900001 | 34000000 | 0.060 | 0.929 | normal |
| chr02 | 34000001 | 34100000 | 0.087 | 0.896 | normal |
| chr02 | 34100001 | 34200000 | 0.041 | 1.070 | normal |



|       |          |          |       |       |        |
|-------|----------|----------|-------|-------|--------|
| chr02 | 34200001 | 34300000 | 0.068 | 1.014 | normal |
| chr02 | 34300001 | 34400000 | 0.089 | 1.031 | normal |
| chr02 | 34400001 | 34500000 | 0.067 | 1.061 | normal |
| chr02 | 34500001 | 34600000 | 0.102 | 1.078 | normal |
| chr02 | 34600001 | 34700000 | 0.075 | 1.415 | normal |
| chr02 | 34700001 | 34800000 | 0.085 | 1.314 | normal |
| chr02 | 34800001 | 34900000 | 0.159 | 1.737 | sig    |
| chr02 | 34900001 | 35000000 | 0.130 | 1.421 | normal |
| chr02 | 35000001 | 35100000 | 0.032 | 0.913 | normal |
| chr02 | 35100001 | 35200000 | 0.082 | 0.529 | normal |
| chr02 | 35200001 | 35300000 | 0.105 | 0.428 | normal |
| chr02 | 35300001 | 35400000 | 0.091 | 0.518 | normal |
| chr02 | 35400001 | 35500000 | 0.070 | 0.683 | normal |
| chr02 | 35500001 | 35600000 | 0.096 | 0.587 | normal |
| chr02 | 35600001 | 35700000 | 0.096 | 1.066 | normal |
| chr02 | 35700001 | 35800000 | 0.092 | 0.838 | normal |
| chr02 | 35800001 | 35900000 | 0.041 | 1.042 | normal |
| chr02 | 35900001 | 36000000 | 0.039 | 1.099 | normal |
| chr02 | 36000001 | 36100000 | 0.056 | 1.013 | normal |
| chr02 | 36100001 | 36200000 | 0.029 | 1.059 | normal |
| chr02 | 36200001 | 36300000 | 0.073 | 0.821 | normal |
| chr02 | 36300001 | 36400000 | 0.045 | 0.991 | normal |
| chr02 | 36400001 | 36500000 | 0.038 | 1.181 | normal |
| chr02 | 36500001 | 36600000 | 0.006 | 1.053 | normal |
| chr02 | 36600001 | 36700000 | 0.026 | 1.006 | normal |
| chr02 | 36700001 | 36800000 | 0.030 | 1.000 | normal |
| chr02 | 36800001 | 36900000 | 0.032 | 0.996 | normal |
| chr02 | 36900001 | 37000000 | 0.045 | 0.974 | normal |
| chr02 | 37000001 | 37100000 | 0.058 | 0.938 | normal |
| chr02 | 37100001 | 37200000 | 0.074 | 0.860 | normal |
| chr02 | 37200001 | 37300000 | 0.050 | 0.925 | normal |
| chr02 | 37300001 | 37400000 | 0.054 | 0.918 | normal |
| chr02 | 37400001 | 37500000 | 0.064 | 0.842 | normal |
| chr02 | 37500001 | 37600000 | 0.073 | 0.958 | normal |
| chr02 | 37600001 | 37700000 | 0.129 | 0.446 | normal |
| chr02 | 37700001 | 37800000 | 0.035 | 1.026 | normal |
| chr02 | 37800001 | 37900000 | 0.069 | 1.157 | normal |
| chr02 | 37900001 | 38000000 | 0.066 | 1.329 | normal |
| chr02 | 38000001 | 38100000 | 0.027 | 0.959 | normal |
| chr02 | 38100001 | 38200000 | 0.026 | 0.906 | normal |
| chr02 | 38200001 | 38300000 | 0.061 | 0.877 | normal |
| chr02 | 38300001 | 38400000 | 0.100 | 0.853 | normal |
| chr02 | 38400001 | 38500000 | 0.091 | 0.851 | normal |
| chr02 | 38500001 | 38600000 | 0.100 | 1.107 | normal |

|       |          |          |       |       |        |
|-------|----------|----------|-------|-------|--------|
| chr02 | 38600001 | 38700000 | 0.049 | 1.106 | normal |
| chr02 | 38700001 | 38800000 | 0.078 | 1.067 | normal |
| chr15 | 1        | 100000   | 0.073 | 1.810 | normal |
| chr15 | 100001   | 200000   | 0.070 | 1.702 | normal |
| chr15 | 200001   | 300000   | 0.093 | 1.491 | normal |
| chr15 | 300001   | 400000   | 0.174 | 1.623 | sig    |
| chr15 | 400001   | 500000   | 0.053 | 1.552 | normal |
| chr15 | 500001   | 600000   | 0.156 | 1.412 | normal |
| chr15 | 600001   | 700000   | 0.105 | 1.330 | normal |
| chr15 | 700001   | 800000   | 0.129 | 1.577 | normal |
| chr15 | 800001   | 900000   | 0.083 | 1.571 | normal |
| chr15 | 900001   | 1000000  | 0.188 | 1.370 | normal |
| chr15 | 1000001  | 1100000  | 0.030 | 1.165 | normal |
| chr15 | 1100001  | 1200000  | 0.037 | 1.412 | normal |
| chr15 | 1200001  | 1300000  | 0.078 | 1.270 | normal |
| chr15 | 1300001  | 1400000  | 0.111 | 1.410 | normal |
| chr15 | 1400001  | 1500000  | 0.091 | 1.408 | normal |
| chr15 | 1500001  | 1600000  | 0.057 | 1.311 | normal |
| chr15 | 1600001  | 1700000  | 0.061 | 1.422 | normal |
| chr15 | 1700001  | 1800000  | 0.063 | 1.163 | normal |
| chr15 | 1800001  | 1900000  | 0.057 | 1.137 | normal |
| chr15 | 1900001  | 2000000  | 0.086 | 1.114 | normal |
| chr15 | 2000001  | 2100000  | 0.098 | 1.061 | normal |
| chr15 | 2100001  | 2200000  | 0.046 | 0.974 | normal |
| chr15 | 2200001  | 2300000  | 0.085 | 1.074 | normal |
| chr15 | 2300001  | 2400000  | 0.044 | 1.097 | normal |
| chr15 | 2400001  | 2500000  | 0.029 | 1.028 | normal |
| chr15 | 2500001  | 2600000  | 0.057 | 1.213 | normal |
| chr15 | 2600001  | 2700000  | 0.078 | 1.486 | normal |
| chr15 | 2700001  | 2800000  | 0.104 | 0.897 | normal |
| chr15 | 2800001  | 2900000  | 0.051 | 1.122 | normal |
| chr15 | 2900001  | 3000000  | 0.025 | 1.026 | normal |
| chr15 | 3000001  | 3100000  | 0.036 | 0.951 | normal |
| chr15 | 3100001  | 3200000  | 0.072 | 1.232 | normal |
| chr15 | 3200001  | 3300000  | 0.046 | 1.276 | normal |
| chr15 | 3300001  | 3400000  | 0.112 | 1.009 | normal |
| chr15 | 3400001  | 3500000  | 0.076 | 1.185 | normal |
| chr15 | 3500001  | 3600000  | 0.107 | 1.194 | normal |
| chr15 | 3600001  | 3700000  | 0.064 | 1.228 | normal |
| chr15 | 3700001  | 3800000  | 0.094 | 1.515 | normal |
| chr15 | 3800001  | 3900000  | 0.057 | 1.135 | normal |
| chr15 | 3900001  | 4000000  | 0.066 | 0.965 | normal |
| chr15 | 4000001  | 4100000  | 0.164 | 1.038 | normal |
| chr15 | 4100001  | 4200000  | 0.079 | 1.203 | normal |

|       |         |         |       |       |        |
|-------|---------|---------|-------|-------|--------|
| chr15 | 4200001 | 4300000 | 0.020 | 1.125 | normal |
| chr15 | 4300001 | 4400000 | 0.062 | 1.240 | normal |
| chr15 | 4400001 | 4500000 | 0.082 | 1.489 | normal |
| chr15 | 4500001 | 4600000 | 0.045 | 1.318 | normal |
| chr15 | 4600001 | 4700000 | 0.146 | 1.022 | normal |
| chr15 | 4700001 | 4800000 | 0.098 | 1.507 | normal |
| chr15 | 4800001 | 4900000 | 0.067 | 1.046 | normal |
| chr15 | 4900001 | 5000000 | 0.121 | 1.211 | normal |
| chr15 | 5000001 | 5100000 | 0.076 | 1.106 | normal |
| chr15 | 5100001 | 5200000 | 0.034 | 0.944 | normal |
| chr15 | 5200001 | 5300000 | 0.021 | 0.906 | normal |
| chr15 | 5300001 | 5400000 | 0.031 | 0.897 | normal |
| chr15 | 5400001 | 5500000 | 0.016 | 0.685 | normal |
| chr15 | 5500001 | 5600000 | 0.028 | 0.886 | normal |
| chr15 | 5600001 | 5700000 | 0.060 | 1.016 | normal |
| chr15 | 5700001 | 5800000 | 0.045 | 0.876 | normal |
| chr15 | 5800001 | 5900000 | 0.070 | 0.797 | normal |
| chr15 | 5900001 | 6000000 | 0.104 | 1.097 | normal |
| chr15 | 6000001 | 6100000 | 0.058 | 0.788 | normal |
| chr15 | 6100001 | 6200000 | 0.023 | 1.158 | normal |
| chr15 | 6200001 | 6300000 | 0.021 | 0.950 | normal |
| chr15 | 6300001 | 6400000 | 0.023 | 0.950 | normal |
| chr15 | 6400001 | 6500000 | 0.072 | 1.178 | normal |
| chr15 | 6500001 | 6600000 | 0.070 | 0.868 | normal |
| chr15 | 6600001 | 6700000 | 0.067 | 1.016 | normal |
| chr15 | 6700001 | 6800000 | 0.054 | 0.953 | normal |
| chr15 | 6800001 | 6900000 | 0.050 | 1.267 | normal |
| chr15 | 6900001 | 7000000 | 0.093 | 1.193 | normal |
| chr15 | 7000001 | 7100000 | 0.085 | 1.177 | normal |
| chr15 | 7100001 | 7200000 | 0.037 | 1.227 | normal |
| chr15 | 7200001 | 7300000 | 0.113 | 0.918 | normal |
| chr15 | 7300001 | 7400000 | 0.153 | 1.181 | normal |
| chr15 | 7400001 | 7500000 | 0.098 | 1.261 | normal |
| chr15 | 7500001 | 7600000 | 0.115 | 1.081 | normal |
| chr15 | 7600001 | 7700000 | 0.063 | 0.889 | normal |
| chr15 | 7700001 | 7800000 | 0.053 | 1.016 | normal |
| chr15 | 7800001 | 7900000 | 0.049 | 1.131 | normal |
| chr15 | 7900001 | 8000000 | 0.015 | 0.934 | normal |
| chr15 | 8000001 | 8100000 | 0.009 | 1.048 | normal |
| chr15 | 8100001 | 8200000 | 0.010 | 0.973 | normal |
| chr15 | 8200001 | 8300000 | 0.007 | 0.918 | normal |
| chr15 | 8300001 | 8400000 | 0.047 | 0.729 | normal |
| chr15 | 8400001 | 8500000 | 0.093 | 0.777 | normal |
| chr15 | 8500001 | 8600000 | 0.101 | 0.708 | normal |

|       |          |          |       |       |        |
|-------|----------|----------|-------|-------|--------|
| chr15 | 8600001  | 8700000  | 0.099 | 0.751 | normal |
| chr15 | 8700001  | 8800000  | 0.070 | 0.912 | normal |
| chr15 | 8800001  | 8900000  | 0.069 | 0.697 | normal |
| chr15 | 8900001  | 9000000  | 0.166 | 1.842 | sig    |
| chr15 | 9000001  | 9100000  | 0.031 | 0.942 | normal |
| chr15 | 9100001  | 9200000  | 0.086 | 1.023 | normal |
| chr15 | 9200001  | 9300000  | 0.089 | 1.049 | normal |
| chr15 | 9300001  | 9400000  | 0.064 | 1.325 | normal |
| chr15 | 9400001  | 9500000  | 0.144 | 1.795 | normal |
| chr15 | 9500001  | 9600000  | 0.131 | 1.231 | normal |
| chr15 | 9600001  | 9700000  | 0.086 | 1.369 | normal |
| chr15 | 9700001  | 9800000  | 0.115 | 1.066 | normal |
| chr15 | 9800001  | 9900000  | 0.185 | 0.831 | normal |
| chr15 | 9900001  | 10000000 | 0.184 | 0.844 | normal |
| chr15 | 10000001 | 10100000 | 0.138 | 1.740 | normal |
| chr15 | 10100001 | 10200000 | 0.141 | 1.127 | normal |
| chr15 | 10200001 | 10300000 | 0.127 | 0.884 | normal |
| chr15 | 10300001 | 10400000 | 0.031 | 1.121 | normal |
| chr15 | 10400001 | 10500000 | 0.086 | 1.137 | normal |
| chr15 | 10500001 | 10600000 | 0.082 | 0.909 | normal |
| chr15 | 10600001 | 10700000 | 0.088 | 1.104 | normal |
| chr15 | 10700001 | 10800000 | 0.062 | 1.064 | normal |
| chr15 | 10800001 | 10900000 | 0.109 | 0.969 | normal |
| chr15 | 10900001 | 11000000 | 0.039 | 0.960 | normal |
| chr15 | 11000001 | 11100000 | 0.164 | 0.946 | normal |
| chr15 | 11100001 | 11200000 | 0.082 | 1.098 | normal |
| chr15 | 11200001 | 11300000 | 0.126 | 0.843 | normal |
| chr15 | 11300001 | 11400000 | 0.159 | 1.292 | normal |
| chr15 | 11400001 | 11500000 | 0.138 | 0.873 | normal |
| chr15 | 11500001 | 11600000 | 0.163 | 0.866 | normal |
| chr15 | 11600001 | 11700000 | 0.049 | 1.068 | normal |
| chr15 | 11700001 | 11800000 | 0.047 | 0.913 | normal |
| chr15 | 11800001 | 11900000 | 0.054 | 1.083 | normal |
| chr15 | 11900001 | 12000000 | 0.052 | 1.206 | normal |
| chr15 | 12000001 | 12100000 | 0.124 | 1.401 | normal |
| chr15 | 12100001 | 12200000 | 0.252 | 0.893 | normal |
| chr15 | 12200001 | 12300000 | 0.136 | 1.043 | normal |
| chr15 | 12300001 | 12400000 | 0.090 | 1.678 | normal |
| chr15 | 12400001 | 12500000 | 0.077 | 2.427 | normal |
| chr15 | 12500001 | 12600000 | 0.122 | 1.465 | normal |
| chr15 | 12600001 | 12700000 | 0.076 | 1.218 | normal |
| chr15 | 12700001 | 12800000 | 0.134 | 0.716 | normal |
| chr15 | 12800001 | 12900000 | 0.025 | 1.038 | normal |
| chr15 | 12900001 | 13000000 | 0.076 | 1.342 | normal |

|       |          |          |       |       |        |
|-------|----------|----------|-------|-------|--------|
| chr15 | 13000001 | 13100000 | 0.093 | 1.418 | normal |
| chr15 | 13100001 | 13200000 | 0.127 | 1.702 | normal |
| chr15 | 13200001 | 13300000 | 0.073 | 1.118 | normal |
| chr15 | 13300001 | 13400000 | 0.096 | 0.933 | normal |
| chr15 | 13400001 | 13500000 | 0.093 | 1.213 | normal |
| chr15 | 13500001 | 13600000 | 0.049 | 0.858 | normal |
| chr15 | 13600001 | 13700000 | 0.011 | 1.252 | normal |
| chr15 | 13700001 | 13800000 | 0.155 | 0.987 | normal |
| chr15 | 13800001 | 13900000 | 0.183 | 1.127 | normal |
| chr15 | 13900001 | 14000000 | 0.192 | 1.852 | sig    |
| chr15 | 14000001 | 14100000 | 0.146 | 1.414 | normal |
| chr15 | 14100001 | 14200000 | 0.151 | 1.403 | normal |
| chr15 | 14200001 | 14300000 | 0.150 | 1.599 | normal |
| chr15 | 14300001 | 14400000 | 0.095 | 1.177 | normal |
| chr15 | 14400001 | 14500000 | 0.091 | 1.353 | normal |
| chr15 | 14500001 | 14600000 | 0.091 | 1.230 | normal |
| chr15 | 14600001 | 14700000 | 0.125 | 1.324 | normal |
| chr15 | 14700001 | 14800000 | 0.053 | 0.849 | normal |
| chr15 | 14800001 | 14900000 | 0.169 | 0.922 | normal |
| chr15 | 14900001 | 15000000 | 0.250 | 0.925 | normal |
| chr15 | 15000001 | 15100000 | 0.143 | 1.234 | normal |
| chr15 | 15100001 | 15200000 | 0.161 | 1.674 | sig    |
| chr15 | 15200001 | 15300000 | 0.031 | 1.061 | normal |
| chr15 | 15300001 | 15400000 | 0.016 | 1.029 | normal |
| chr15 | 15400001 | 15500000 | 0.067 | 0.923 | normal |
| chr15 | 15500001 | 15600000 | 0.083 | 0.977 | normal |
| chr15 | 15600001 | 15700000 | 0.127 | 1.002 | normal |
| chr15 | 15700001 | 15800000 | 0.097 | 0.918 | normal |
| chr15 | 15800001 | 15900000 | 0.137 | 0.753 | normal |
| chr15 | 15900001 | 16000000 | 0.093 | 0.985 | normal |
| chr15 | 16000001 | 16100000 | 0.098 | 0.951 | normal |
| chr15 | 16100001 | 16200000 | 0.081 | 1.058 | normal |
| chr15 | 16200001 | 16300000 | 0.073 | 1.363 | normal |
| chr15 | 16300001 | 16400000 | 0.065 | 1.179 | normal |
| chr15 | 16400001 | 16500000 | 0.100 | 1.077 | normal |
| chr15 | 16500001 | 16600000 | 0.144 | 1.327 | normal |
| chr15 | 16600001 | 16700000 | 0.209 | 1.736 | sig    |
| chr15 | 16700001 | 16800000 | 0.214 | 1.192 | normal |
| chr15 | 16800001 | 16900000 | 0.058 | 1.213 | normal |
| chr15 | 16900001 | 17000000 | 0.128 | 0.886 | normal |
| chr15 | 17000001 | 17100000 | 0.118 | 0.913 | normal |
| chr15 | 17100001 | 17200000 | 0.105 | 0.896 | normal |
| chr15 | 17200001 | 17300000 | 0.153 | 0.653 | normal |
| chr15 | 17300001 | 17400000 | 0.086 | 0.915 | normal |

|       |          |          |       |       |        |
|-------|----------|----------|-------|-------|--------|
| chr15 | 17400001 | 17500000 | 0.079 | 0.992 | normal |
| chr15 | 17500001 | 17600000 | 0.130 | 0.499 | normal |
| chr15 | 17600001 | 17700000 | 0.076 | 0.964 | normal |
| chr15 | 17700001 | 17800000 | 0.166 | 0.539 | normal |
| chr15 | 17800001 | 17900000 | 0.119 | 0.894 | normal |
| chr15 | 17900001 | 18000000 | 0.085 | 1.149 | normal |
| chr15 | 18000001 | 18100000 | 0.170 | 0.797 | normal |
| chr15 | 18100001 | 18200000 | 0.190 | 2.776 | sig    |
| chr15 | 18200001 | 18300000 | 0.193 | 2.505 | sig    |
| chr15 | 18300001 | 18400000 | 0.103 | 1.054 | normal |
| chr15 | 18400001 | 18500000 | 0.088 | 1.040 | normal |
| chr15 | 18500001 | 18600000 | 0.079 | 1.095 | normal |
| chr15 | 18600001 | 18700000 | 0.078 | 0.881 | normal |
| chr15 | 18700001 | 18800000 | 0.145 | 0.847 | normal |
| chr15 | 18800001 | 18900000 | 0.077 | 1.305 | normal |
| chr15 | 18900001 | 19000000 | 0.042 | 1.099 | normal |
| chr15 | 19000001 | 19100000 | 0.035 | 1.102 | normal |
| chr15 | 19100001 | 19200000 | 0.070 | 0.965 | normal |
| chr15 | 19200001 | 19300000 | 0.026 | 1.062 | normal |
| chr15 | 19300001 | 19400000 | 0.017 | 0.979 | normal |
| chr15 | 19400001 | 19500000 | 0.013 | 0.959 | normal |
| chr15 | 19500001 | 19600000 | 0.220 | 0.594 | normal |
| chr15 | 19600001 | 19700000 | 0.140 | 0.800 | normal |
| chr15 | 19700001 | 19800000 | 0.093 | 0.943 | normal |
| chr15 | 19800001 | 19900000 | 0.138 | 0.937 | normal |
| chr15 | 19900001 | 20000000 | 0.120 | 0.809 | normal |
| chr15 | 20000001 | 20100000 | 0.163 | 0.801 | normal |
| chr15 | 20100001 | 20200000 | 0.144 | 0.683 | normal |
| chr15 | 20200001 | 20300000 | 0.038 | 1.066 | normal |
| chr15 | 20300001 | 20400000 | 0.074 | 1.163 | normal |
| chr15 | 20400001 | 20500000 | 0.101 | 0.925 | normal |
| chr15 | 20500001 | 20600000 | 0.075 | 1.021 | normal |
| chr15 | 20600001 | 20700000 | 0.073 | 1.124 | normal |
| chr15 | 20700001 | 20800000 | 0.022 | 1.022 | normal |
| chr15 | 20800001 | 20900000 | 0.034 | 1.021 | normal |
| chr15 | 20900001 | 21000000 | 0.119 | 1.200 | normal |
| chr15 | 21000001 | 21100000 | 0.081 | 0.969 | normal |
| chr15 | 21100001 | 21200000 | 0.080 | 0.766 | normal |
| chr15 | 21200001 | 21300000 | 0.074 | 1.012 | normal |
| chr15 | 21300001 | 21400000 | 0.246 | 0.447 | normal |
| chr15 | 21400001 | 21500000 | 0.121 | 1.127 | normal |
| chr15 | 21500001 | 21600000 | 0.008 | 0.995 | normal |
| chr15 | 21600001 | 21700000 | 0.011 | 0.862 | normal |
| chr15 | 21700001 | 21800000 | 0.045 | 1.038 | normal |

|       |          |          |       |       |        |
|-------|----------|----------|-------|-------|--------|
| chr15 | 21800001 | 21900000 | 0.146 | 1.400 | normal |
| chr15 | 21900001 | 22000000 | 0.139 | 1.245 | normal |
| chr15 | 22000001 | 22100000 | 0.227 | 0.638 | normal |
| chr15 | 22100001 | 22200000 | 0.130 | 0.783 | normal |
| chr15 | 22200001 | 22300000 | 0.100 | 0.845 | normal |
| chr15 | 22300001 | 22400000 | 0.107 | 1.094 | normal |
| chr15 | 22400001 | 22500000 | 0.066 | 1.150 | normal |
| chr15 | 22500001 | 22600000 | 0.028 | 1.120 | normal |
| chr15 | 22600001 | 22700000 | 0.105 | 0.980 | normal |
| chr15 | 22700001 | 22800000 | 0.232 | 0.531 | normal |
| chr15 | 22800001 | 22900000 | 0.075 | 0.895 | normal |
| chr15 | 22900001 | 23000000 | 0.075 | 0.987 | normal |
| chr15 | 23000001 | 23100000 | 0.179 | 1.541 | sig    |
| chr15 | 23100001 | 23200000 | 0.050 | 1.097 | normal |
| chr15 | 23200001 | 23300000 | 0.013 | 0.975 | normal |
| chr15 | 23300001 | 23400000 | 0.105 | 1.054 | normal |
| chr15 | 23400001 | 23500000 | 0.073 | 1.550 | normal |
| chr15 | 23500001 | 23600000 | 0.043 | 1.008 | normal |
| chr15 | 23600001 | 23700000 | 0.110 | 0.804 | normal |
| chr15 | 23700001 | 23800000 | 0.080 | 0.799 | normal |
| chr15 | 23800001 | 23900000 | 0.033 | 1.102 | normal |
| chr15 | 23900001 | 24000000 | 0.056 | 1.104 | normal |
| chr15 | 24000001 | 24100000 | 0.121 | 0.769 | normal |
| chr15 | 24100001 | 24200000 | 0.082 | 0.802 | normal |
| chr15 | 24200001 | 24300000 | 0.080 | 1.323 | normal |
| chr15 | 24300001 | 24400000 | 0.095 | 1.055 | normal |
| chr15 | 24400001 | 24500000 | 0.045 | 0.949 | normal |
| chr15 | 24500001 | 24600000 | 0.015 | 0.972 | normal |
| chr15 | 24600001 | 24700000 | 0.022 | 0.879 | normal |
| chr15 | 24700001 | 24800000 | 0.082 | 1.167 | normal |
| chr15 | 24800001 | 24900000 | 0.115 | 1.218 | normal |
| chr15 | 24900001 | 25000000 | 0.062 | 1.218 | normal |
| chr15 | 25000001 | 25100000 | 0.135 | 1.490 | normal |
| chr15 | 25100001 | 25200000 | 0.119 | 0.977 | normal |
| chr15 | 25200001 | 25300000 | 0.137 | 1.539 | normal |
| chr15 | 25300001 | 25400000 | 0.084 | 1.404 | normal |
| chr15 | 25400001 | 25500000 | 0.078 | 0.959 | normal |
| chr15 | 25500001 | 25600000 | 0.057 | 1.257 | normal |
| chr15 | 25600001 | 25700000 | 0.115 | 0.928 | normal |
| chr15 | 25700001 | 25800000 | 0.086 | 1.282 | normal |
| chr15 | 25800001 | 25900000 | 0.084 | 0.753 | normal |
| chr15 | 25900001 | 26000000 | 0.032 | 0.985 | normal |
| chr15 | 26000001 | 26100000 | 0.019 | 1.039 | normal |
| chr15 | 26100001 | 26200000 | 0.024 | 0.995 | normal |

|       |          |          |       |       |        |
|-------|----------|----------|-------|-------|--------|
| chr15 | 26200001 | 26300000 | 0.060 | 1.121 | normal |
| chr15 | 26300001 | 26400000 | 0.061 | 1.015 | normal |
| chr15 | 26400001 | 26500000 | 0.088 | 1.051 | normal |
| chr15 | 26500001 | 26600000 | 0.120 | 0.621 | normal |
| chr15 | 26600001 | 26700000 | 0.068 | 1.034 | normal |
| chr15 | 26700001 | 26800000 | 0.035 | 1.031 | normal |
| chr15 | 26800001 | 26900000 | 0.018 | 0.946 | normal |
| chr15 | 26900001 | 27000000 | 0.053 | 1.194 | normal |
| chr15 | 27000001 | 27100000 | 0.051 | 1.117 | normal |
| chr15 | 27100001 | 27200000 | 0.051 | 1.160 | normal |
| chr15 | 27200001 | 27300000 | 0.028 | 0.991 | normal |
| chr15 | 27300001 | 27400000 | 0.129 | 1.035 | normal |
| chr15 | 27400001 | 27500000 | 0.069 | 0.762 | normal |
| chr15 | 27500001 | 27600000 | 0.085 | 1.272 | normal |
| chr15 | 27600001 | 27700000 | 0.067 | 1.247 | normal |
| chr15 | 27700001 | 27800000 | 0.097 | 1.369 | normal |
| chr15 | 27800001 | 27900000 | 0.073 | 1.002 | normal |
| chr15 | 27900001 | 28000000 | 0.116 | 0.811 | normal |
| chr15 | 28000001 | 28100000 | 0.063 | 0.864 | normal |
| chr15 | 28100001 | 28200000 | 0.095 | 0.813 | normal |
| chr15 | 28200001 | 28300000 | 0.049 | 1.173 | normal |
| chr15 | 28300001 | 28400000 | 0.074 | 1.176 | normal |
| chr15 | 28400001 | 28500000 | 0.134 | 1.065 | normal |
| chr15 | 28500001 | 28600000 | 0.111 | 1.246 | normal |
| chr15 | 28600001 | 28700000 | 0.138 | 1.576 | normal |
| chr15 | 28700001 | 28800000 | 0.089 | 1.112 | normal |
| chr15 | 28800001 | 28900000 | 0.063 | 0.956 | normal |
| chr15 | 28900001 | 29000000 | 0.061 | 1.040 | normal |
| chr15 | 29000001 | 29100000 | 0.052 | 0.902 | normal |
| chr15 | 29100001 | 29200000 | 0.063 | 1.026 | normal |
| chr15 | 29200001 | 29300000 | 0.062 | 1.129 | normal |
| chr15 | 29300001 | 29400000 | 0.073 | 1.052 | normal |
| chr15 | 29400001 | 29500000 | 0.115 | 0.931 | normal |
| chr15 | 29500001 | 29600000 | 0.108 | 0.922 | normal |
| chr15 | 29600001 | 29700000 | 0.153 | 0.778 | normal |
| chr15 | 29700001 | 29800000 | 0.085 | 0.837 | normal |
| chr15 | 29800001 | 29900000 | 0.107 | 0.749 | normal |
| chr15 | 29900001 | 30000000 | 0.115 | 0.809 | normal |
| chr15 | 30000001 | 30100000 | 0.106 | 1.004 | normal |
| chr15 | 30100001 | 30200000 | 0.080 | 0.895 | normal |
| chr15 | 30200001 | 30300000 | 0.076 | 1.018 | normal |
| chr15 | 30300001 | 30400000 | 0.047 | 0.987 | normal |
| chr15 | 30400001 | 30500000 | 0.133 | 1.024 | normal |
| chr15 | 30500001 | 30600000 | 0.082 | 0.979 | normal |



|       |          |          |       |       |        |
|-------|----------|----------|-------|-------|--------|
| chr15 | 30600001 | 30700000 | 0.063 | 0.944 | normal |
| chr15 | 30700001 | 30800000 | 0.085 | 1.090 | normal |
| chr15 | 30800001 | 30900000 | 0.078 | 0.903 | normal |
| chr15 | 30900001 | 31000000 | 0.073 | 1.268 | normal |
| chr15 | 31000001 | 31100000 | 0.134 | 1.180 | normal |
| chr15 | 31100001 | 31200000 | 0.118 | 1.366 | normal |
| chr15 | 31200001 | 31300000 | 0.065 | 1.545 | normal |
| chr15 | 31300001 | 31400000 | 0.084 | 1.229 | normal |
| chr15 | 31400001 | 31500000 | 0.103 | 0.829 | normal |
| chr15 | 31500001 | 31600000 | 0.080 | 0.935 | normal |
| chr15 | 31600001 | 31700000 | 0.094 | 0.927 | normal |
| chr15 | 31700001 | 31800000 | 0.083 | 0.814 | normal |
| chr15 | 31800001 | 31900000 | 0.057 | 1.090 | normal |
| chr15 | 31900001 | 32000000 | 0.107 | 1.044 | normal |
| chr15 | 32000001 | 32100000 | 0.060 | 0.957 | normal |
| chr15 | 32100001 | 32200000 | 0.077 | 1.165 | normal |
| chr15 | 32200001 | 32300000 | 0.090 | 1.604 | normal |
| chr15 | 32300001 | 32400000 | 0.067 | 1.075 | normal |
| chr15 | 32400001 | 32500000 | 0.198 | 0.986 | normal |
| chr15 | 32500001 | 32600000 | 0.042 | 1.157 | normal |
| chr15 | 32600001 | 32700000 | 0.041 | 1.013 | normal |
| chr15 | 32700001 | 32800000 | 0.067 | 0.930 | normal |
| chr15 | 32800001 | 32900000 | 0.068 | 1.064 | normal |
| chr15 | 32900001 | 33000000 | 0.087 | 0.824 | normal |
| chr15 | 33000001 | 33100000 | 0.088 | 0.983 | normal |
| chr15 | 33100001 | 33200000 | 0.084 | 1.088 | normal |
| chr15 | 33200001 | 33300000 | 0.036 | 0.916 | normal |
| chr15 | 33300001 | 33400000 | 0.083 | 0.967 | normal |
| chr15 | 33400001 | 33500000 | 0.065 | 0.994 | normal |
| chr15 | 33500001 | 33600000 | 0.032 | 1.018 | normal |
| chr15 | 33600001 | 33700000 | 0.073 | 1.006 | normal |
| chr15 | 33700001 | 33800000 | 0.036 | 0.942 | normal |
| chr15 | 33800001 | 33900000 | 0.077 | 1.103 | normal |
| chr15 | 33900001 | 34000000 | 0.074 | 1.004 | normal |
| chr15 | 34000001 | 34100000 | 0.065 | 0.791 | normal |
| chr15 | 34100001 | 34200000 | 0.079 | 0.980 | normal |
| chr15 | 34200001 | 34300000 | 0.158 | 0.870 | normal |
| chr15 | 34300001 | 34400000 | 0.122 | 1.122 | normal |
| chr15 | 34400001 | 34500000 | 0.111 | 0.924 | normal |
| chr15 | 34500001 | 34600000 | 0.065 | 1.163 | normal |
| chr15 | 34600001 | 34700000 | 0.082 | 0.946 | normal |
| chr15 | 34700001 | 34800000 | 0.048 | 1.042 | normal |
| chr15 | 34800001 | 34900000 | 0.096 | 1.080 | normal |
| chr15 | 34900001 | 35000000 | 0.114 | 1.029 | normal |

|       |          |          |       |       |        |
|-------|----------|----------|-------|-------|--------|
| chr15 | 35000001 | 35100000 | 0.063 | 1.176 | normal |
| chr15 | 35100001 | 35200000 | 0.122 | 1.411 | normal |
| chr15 | 35200001 | 35300000 | 0.199 | 1.272 | normal |
| chr15 | 35300001 | 35400000 | 0.081 | 1.128 | normal |
| chr15 | 35400001 | 35500000 | 0.073 | 1.223 | normal |
| chr15 | 35500001 | 35600000 | 0.061 | 1.019 | normal |
| chr15 | 35600001 | 35700000 | 0.063 | 0.929 | normal |
| chr15 | 35700001 | 35800000 | 0.107 | 1.049 | normal |
| chr15 | 35800001 | 35900000 | 0.075 | 0.922 | normal |
| chr15 | 35900001 | 36000000 | 0.088 | 0.632 | normal |
| chr15 | 36000001 | 36100000 | 0.138 | 1.107 | normal |
| chr15 | 36100001 | 36200000 | 0.053 | 0.899 | normal |
| chr15 | 36200001 | 36300000 | 0.054 | 1.009 | normal |
| chr15 | 36300001 | 36400000 | 0.103 | 0.824 | normal |
| chr15 | 36400001 | 36500000 | 0.065 | 0.923 | normal |
| chr15 | 36500001 | 36600000 | 0.038 | 0.924 | normal |
| chr15 | 36600001 | 36700000 | 0.064 | 0.880 | normal |
| chr15 | 36700001 | 36800000 | 0.091 | 1.064 | normal |
| chr15 | 36800001 | 36900000 | 0.082 | 1.155 | normal |
| chr15 | 36900001 | 37000000 | 0.077 | 0.907 | normal |
| chr15 | 37000001 | 37100000 | 0.159 | 1.240 | normal |
| chr15 | 37100001 | 37200000 | 0.114 | 1.042 | normal |
| chr15 | 37200001 | 37300000 | 0.105 | 1.258 | normal |
| chr15 | 37300001 | 37400000 | 0.115 | 0.813 | normal |
| chr15 | 37400001 | 37500000 | 0.130 | 0.857 | normal |
| chr15 | 37500001 | 37600000 | 0.112 | 0.987 | normal |
| chr15 | 37600001 | 37700000 | 0.108 | 1.075 | normal |
| chr15 | 37700001 | 37800000 | 0.088 | 0.912 | normal |
| chr15 | 37800001 | 37900000 | 0.152 | 1.012 | normal |
| chr15 | 37900001 | 38000000 | 0.091 | 1.036 | normal |
| chr15 | 38000001 | 38100000 | 0.109 | 0.976 | normal |
| chr15 | 38100001 | 38200000 | 0.075 | 1.162 | normal |
| chr15 | 38200001 | 38300000 | 0.069 | 1.008 | normal |
| chr15 | 38300001 | 38400000 | 0.149 | 0.840 | normal |
| chr15 | 38400001 | 38500000 | 0.112 | 0.672 | normal |
| chr15 | 38500001 | 38600000 | 0.119 | 0.628 | normal |
| chr15 | 38600001 | 38700000 | 0.129 | 0.618 | normal |
| chr07 | 1        | 100000   | 0.058 | 1.298 | normal |
| chr07 | 100001   | 200000   | 0.094 | 1.411 | normal |
| chr07 | 200001   | 300000   | 0.048 | 1.060 | normal |
| chr07 | 300001   | 400000   | 0.052 | 0.770 | normal |
| chr07 | 400001   | 500000   | 0.052 | 0.938 | normal |
| chr07 | 500001   | 600000   | 0.070 | 1.163 | normal |
| chr07 | 600001   | 700000   | 0.078 | 1.052 | normal |

|       |         |         |       |       |        |
|-------|---------|---------|-------|-------|--------|
| chr07 | 700001  | 800000  | 0.052 | 1.198 | normal |
| chr07 | 800001  | 900000  | 0.066 | 1.045 | normal |
| chr07 | 900001  | 1000000 | 0.100 | 1.115 | normal |
| chr07 | 1000001 | 1100000 | 0.044 | 0.964 | normal |
| chr07 | 1100001 | 1200000 | 0.099 | 1.192 | normal |
| chr07 | 1200001 | 1300000 | 0.091 | 0.932 | normal |
| chr07 | 1300001 | 1400000 | 0.036 | 1.033 | normal |
| chr07 | 1400001 | 1500000 | 0.045 | 1.141 | normal |
| chr07 | 1500001 | 1600000 | 0.046 | 1.177 | normal |
| chr07 | 1600001 | 1700000 | 0.024 | 1.145 | normal |
| chr07 | 1700001 | 1800000 | 0.034 | 1.094 | normal |
| chr07 | 1800001 | 1900000 | 0.047 | 1.068 | normal |
| chr07 | 1900001 | 2000000 | 0.039 | 1.887 | normal |
| chr07 | 2000001 | 2100000 | 0.066 | 0.891 | normal |
| chr07 | 2100001 | 2200000 | 0.028 | 1.093 | normal |
| chr07 | 2200001 | 2300000 | 0.034 | 1.149 | normal |
| chr07 | 2300001 | 2400000 | 0.021 | 1.057 | normal |
| chr07 | 2400001 | 2500000 | 0.034 | 1.055 | normal |
| chr07 | 2500001 | 2600000 | 0.027 | 0.877 | normal |
| chr07 | 2600001 | 2700000 | 0.036 | 1.200 | normal |
| chr07 | 2700001 | 2800000 | 0.026 | 1.080 | normal |
| chr07 | 2800001 | 2900000 | 0.010 | 0.985 | normal |
| chr07 | 2900001 | 3000000 | 0.022 | 0.959 | normal |
| chr07 | 3000001 | 3100000 | 0.036 | 0.955 | normal |
| chr07 | 3100001 | 3200000 | 0.047 | 0.845 | normal |
| chr07 | 3200001 | 3300000 | 0.042 | 0.980 | normal |
| chr07 | 3300001 | 3400000 | 0.062 | 1.063 | normal |
| chr07 | 3400001 | 3500000 | 0.031 | 1.059 | normal |
| chr07 | 3500001 | 3600000 | 0.020 | 1.027 | normal |
| chr07 | 3600001 | 3700000 | 0.063 | 1.061 | normal |
| chr07 | 3700001 | 3800000 | 0.062 | 1.095 | normal |
| chr07 | 3800001 | 3900000 | 0.049 | 0.889 | normal |
| chr07 | 3900001 | 4000000 | 0.022 | 1.129 | normal |
| chr07 | 4000001 | 4100000 | 0.026 | 1.005 | normal |
| chr07 | 4100001 | 4200000 | 0.019 | 1.093 | normal |
| chr07 | 4200001 | 4300000 | 0.014 | 1.064 | normal |
| chr07 | 4300001 | 4400000 | 0.025 | 1.085 | normal |
| chr07 | 4400001 | 4500000 | 0.034 | 1.022 | normal |
| chr07 | 4500001 | 4600000 | 0.014 | 1.037 | normal |
| chr07 | 4600001 | 4700000 | 0.038 | 0.989 | normal |
| chr07 | 4700001 | 4800000 | 0.029 | 1.147 | normal |
| chr07 | 4800001 | 4900000 | 0.059 | 1.082 | normal |
| chr07 | 4900001 | 5000000 | 0.057 | 0.912 | normal |
| chr07 | 5000001 | 5100000 | 0.069 | 1.720 | normal |

|       |         |         |       |       |        |
|-------|---------|---------|-------|-------|--------|
| chr07 | 5100001 | 5200000 | 0.034 | 1.077 | normal |
| chr07 | 5200001 | 5300000 | 0.034 | 1.174 | normal |
| chr07 | 5300001 | 5400000 | 0.030 | 1.253 | normal |
| chr07 | 5400001 | 5500000 | 0.028 | 1.084 | normal |
| chr07 | 5500001 | 5600000 | 0.051 | 1.154 | normal |
| chr07 | 5600001 | 5700000 | 0.048 | 1.110 | normal |
| chr07 | 5700001 | 5800000 | 0.038 | 0.988 | normal |
| chr07 | 5800001 | 5900000 | 0.045 | 1.164 | normal |
| chr07 | 5900001 | 6000000 | 0.032 | 0.928 | normal |
| chr07 | 6000001 | 6100000 | 0.042 | 1.284 | normal |
| chr07 | 6100001 | 6200000 | 0.030 | 0.994 | normal |
| chr07 | 6200001 | 6300000 | 0.026 | 1.062 | normal |
| chr07 | 6300001 | 6400000 | 0.037 | 1.141 | normal |
| chr07 | 6400001 | 6500000 | 0.027 | 1.051 | normal |
| chr07 | 6500001 | 6600000 | 0.025 | 1.089 | normal |
| chr07 | 6600001 | 6700000 | 0.026 | 1.092 | normal |
| chr07 | 6700001 | 6800000 | 0.025 | 1.078 | normal |
| chr07 | 6800001 | 6900000 | 0.022 | 1.111 | normal |
| chr07 | 6900001 | 7000000 | 0.042 | 1.329 | normal |
| chr07 | 7000001 | 7100000 | 0.035 | 0.965 | normal |
| chr07 | 7100001 | 7200000 | 0.034 | 1.063 | normal |
| chr07 | 7200001 | 7300000 | 0.041 | 1.086 | normal |
| chr07 | 7300001 | 7400000 | 0.044 | 1.278 | normal |
| chr07 | 7400001 | 7500000 | 0.042 | 1.078 | normal |
| chr07 | 7500001 | 7600000 | 0.078 | 1.193 | normal |
| chr07 | 7600001 | 7700000 | 0.024 | 1.046 | normal |
| chr07 | 7700001 | 7800000 | 0.056 | 1.058 | normal |
| chr07 | 7800001 | 7900000 | 0.054 | 1.193 | normal |
| chr07 | 7900001 | 8000000 | 0.032 | 1.123 | normal |
| chr07 | 8000001 | 8100000 | 0.007 | 1.003 | normal |
| chr07 | 8100001 | 8200000 | 0.009 | 0.992 | normal |
| chr07 | 8200001 | 8300000 | 0.040 | 0.942 | normal |
| chr07 | 8300001 | 8400000 | 0.073 | 1.099 | normal |
| chr07 | 8400001 | 8500000 | 0.052 | 0.973 | normal |
| chr07 | 8500001 | 8600000 | 0.048 | 1.116 | normal |
| chr07 | 8600001 | 8700000 | 0.061 | 0.898 | normal |
| chr07 | 8700001 | 8800000 | 0.042 | 0.893 | normal |
| chr07 | 8800001 | 8900000 | 0.061 | 0.896 | normal |
| chr07 | 8900001 | 9000000 | 0.030 | 1.043 | normal |
| chr07 | 9000001 | 9100000 | 0.042 | 1.386 | normal |
| chr07 | 9100001 | 9200000 | 0.042 | 0.867 | normal |
| chr07 | 9200001 | 9300000 | 0.026 | 1.014 | normal |
| chr07 | 9300001 | 9400000 | 0.041 | 0.924 | normal |
| chr07 | 9400001 | 9500000 | 0.015 | 1.027 | normal |

|       |          |          |       |       |        |
|-------|----------|----------|-------|-------|--------|
| chr07 | 9500001  | 9600000  | 0.038 | 0.969 | normal |
| chr07 | 9600001  | 9700000  | 0.034 | 1.040 | normal |
| chr07 | 9700001  | 9800000  | 0.016 | 1.097 | normal |
| chr07 | 9800001  | 9900000  | 0.031 | 1.008 | normal |
| chr07 | 9900001  | 10000000 | 0.035 | 1.105 | normal |
| chr07 | 10000001 | 10100000 | 0.046 | 1.069 | normal |
| chr07 | 10100001 | 10200000 | 0.036 | 1.274 | normal |
| chr07 | 10200001 | 10300000 | 0.038 | 0.977 | normal |
| chr07 | 10300001 | 10400000 | 0.024 | 0.990 | normal |
| chr07 | 10400001 | 10500000 | 0.031 | 1.171 | normal |
| chr07 | 10500001 | 10600000 | 0.047 | 1.192 | normal |
| chr07 | 10600001 | 10700000 | 0.053 | 0.878 | normal |
| chr07 | 10700001 | 10800000 | 0.023 | 1.060 | normal |
| chr07 | 10800001 | 10900000 | 0.086 | 1.198 | normal |
| chr07 | 10900001 | 11000000 | 0.080 | 1.061 | normal |
| chr07 | 11000001 | 11100000 | 0.037 | 1.045 | normal |
| chr07 | 11100001 | 11200000 | 0.064 | 1.099 | normal |
| chr07 | 11200001 | 11300000 | 0.039 | 0.927 | normal |
| chr07 | 11300001 | 11400000 | 0.052 | 0.933 | normal |
| chr07 | 11400001 | 11500000 | 0.051 | 0.966 | normal |
| chr07 | 11500001 | 11600000 | 0.048 | 1.277 | normal |
| chr07 | 11600001 | 11700000 | 0.064 | 1.202 | normal |
| chr07 | 11700001 | 11800000 | 0.089 | 1.077 | normal |
| chr07 | 11800001 | 11900000 | 0.053 | 1.256 | normal |
| chr07 | 11900001 | 12000000 | 0.045 | 1.179 | normal |
| chr07 | 12000001 | 12100000 | 0.032 | 1.211 | normal |
| chr07 | 12100001 | 12200000 | 0.026 | 1.146 | normal |
| chr07 | 12200001 | 12300000 | 0.083 | 1.363 | normal |
| chr07 | 12300001 | 12400000 | 0.115 | 1.086 | normal |
| chr07 | 12400001 | 12500000 | 0.073 | 1.142 | normal |
| chr07 | 12500001 | 12600000 | 0.021 | 1.153 | normal |
| chr07 | 12600001 | 12700000 | 0.066 | 1.100 | normal |
| chr07 | 12700001 | 12800000 | 0.130 | 1.228 | normal |
| chr07 | 12800001 | 12900000 | 0.089 | 1.303 | normal |
| chr07 | 12900001 | 13000000 | 0.053 | 1.041 | normal |
| chr07 | 13000001 | 13100000 | 0.054 | 1.149 | normal |
| chr07 | 13100001 | 13200000 | 0.112 | 0.951 | normal |
| chr07 | 13200001 | 13300000 | 0.049 | 1.203 | normal |
| chr07 | 13300001 | 13400000 | 0.066 | 0.910 | normal |
| chr07 | 13400001 | 13500000 | 0.031 | 1.202 | normal |
| chr07 | 13500001 | 13600000 | 0.035 | 1.012 | normal |
| chr07 | 13600001 | 13700000 | 0.027 | 1.041 | normal |
| chr07 | 13700001 | 13800000 | 0.026 | 1.062 | normal |
| chr07 | 13800001 | 13900000 | 0.051 | 1.470 | normal |

|       |          |          |       |       |        |
|-------|----------|----------|-------|-------|--------|
| chr07 | 13900001 | 14000000 | 0.043 | 1.458 | normal |
| chr07 | 14000001 | 14100000 | 0.033 | 1.289 | normal |
| chr07 | 14100001 | 14200000 | 0.041 | 0.992 | normal |
| chr07 | 14200001 | 14300000 | 0.047 | 1.022 | normal |
| chr07 | 14300001 | 14400000 | 0.063 | 0.961 | normal |
| chr07 | 14400001 | 14500000 | 0.028 | 0.911 | normal |
| chr07 | 14500001 | 14600000 | 0.066 | 1.135 | normal |
| chr07 | 14600001 | 14700000 | 0.048 | 1.345 | normal |
| chr07 | 14700001 | 14800000 | 0.030 | 1.092 | normal |
| chr07 | 14800001 | 14900000 | 0.026 | 1.048 | normal |
| chr07 | 14900001 | 15000000 | 0.052 | 0.990 | normal |
| chr07 | 15000001 | 15100000 | 0.020 | 1.258 | normal |
| chr07 | 15100001 | 15200000 | 0.047 | 0.934 | normal |
| chr07 | 15200001 | 15300000 | 0.033 | 1.168 | normal |
| chr07 | 15300001 | 15400000 | 0.036 | 0.964 | normal |
| chr07 | 15400001 | 15500000 | 0.019 | 1.031 | normal |
| chr07 | 15500001 | 15600000 | 0.024 | 0.960 | normal |
| chr07 | 15600001 | 15700000 | 0.012 | 1.032 | normal |
| chr07 | 15700001 | 15800000 | 0.021 | 0.938 | normal |
| chr07 | 15800001 | 15900000 | 0.009 | 1.001 | normal |
| chr07 | 15900001 | 16000000 | 0.014 | 1.136 | normal |
| chr07 | 16000001 | 16100000 | 0.018 | 1.176 | normal |
| chr07 | 16100001 | 16200000 | 0.036 | 1.086 | normal |
| chr07 | 16200001 | 16300000 | 0.012 | 0.908 | normal |
| chr07 | 16300001 | 16400000 | 0.019 | 0.935 | normal |
| chr07 | 16400001 | 16500000 | 0.026 | 0.971 | normal |
| chr07 | 16500001 | 16600000 | 0.033 | 1.309 | normal |
| chr07 | 16600001 | 16700000 | 0.027 | 1.174 | normal |
| chr07 | 16700001 | 16800000 | 0.051 | 1.016 | normal |
| chr07 | 16800001 | 16900000 | 0.061 | 1.234 | normal |
| chr07 | 16900001 | 17000000 | 0.023 | 1.243 | normal |
| chr07 | 17000001 | 17100000 | 0.036 | 1.188 | normal |
| chr07 | 17100001 | 17200000 | 0.039 | 1.553 | normal |
| chr07 | 17200001 | 17300000 | 0.069 | 1.649 | normal |
| chr07 | 17300001 | 17400000 | 0.053 | 1.011 | normal |
| chr07 | 17400001 | 17500000 | 0.099 | 0.810 | normal |
| chr07 | 17500001 | 17600000 | 0.057 | 0.852 | normal |
| chr07 | 17600001 | 17700000 | 0.035 | 0.882 | normal |
| chr07 | 17700001 | 17800000 | 0.021 | 0.940 | normal |
| chr07 | 17800001 | 17900000 | 0.090 | 0.801 | normal |
| chr07 | 17900001 | 18000000 | 0.127 | 1.942 | normal |
| chr07 | 18000001 | 18100000 | 0.062 | 1.219 | normal |
| chr07 | 18100001 | 18200000 | 0.167 | 1.678 | sig    |
| chr07 | 18200001 | 18300000 | 0.084 | 1.469 | normal |

|       |          |          |       |       |        |
|-------|----------|----------|-------|-------|--------|
| chr07 | 18300001 | 18400000 | 0.052 | 0.910 | normal |
| chr07 | 18400001 | 18500000 | 0.020 | 0.947 | normal |
| chr07 | 18500001 | 18600000 | 0.051 | 1.145 | normal |
| chr07 | 18600001 | 18700000 | 0.027 | 0.905 | normal |
| chr07 | 18700001 | 18800000 | 0.023 | 0.878 | normal |
| chr07 | 18800001 | 18900000 | 0.028 | 0.884 | normal |
| chr07 | 18900001 | 19000000 | 0.049 | 0.822 | normal |
| chr07 | 19000001 | 19100000 | 0.031 | 0.911 | normal |
| chr07 | 19100001 | 19200000 | 0.059 | 0.801 | normal |
| chr07 | 19200001 | 19300000 | 0.095 | 0.606 | normal |
| chr07 | 19300001 | 19400000 | 0.114 | 0.512 | normal |
| chr07 | 19400001 | 19500000 | 0.052 | 0.658 | normal |
| chr07 | 19500001 | 19600000 | 0.039 | 0.893 | normal |
| chr07 | 19600001 | 19700000 | 0.035 | 0.959 | normal |
| chr07 | 19700001 | 19800000 | 0.024 | 1.035 | normal |
| chr07 | 19800001 | 19900000 | 0.071 | 1.085 | normal |
| chr07 | 19900001 | 20000000 | 0.100 | 0.920 | normal |
| chr07 | 20000001 | 20100000 | 0.012 | 1.051 | normal |
| chr07 | 20100001 | 20200000 | 0.038 | 1.307 | normal |
| chr07 | 20200001 | 20300000 | 0.037 | 0.898 | normal |
| chr07 | 20300001 | 20400000 | 0.023 | 0.842 | normal |
| chr07 | 20400001 | 20500000 | 0.025 | 0.887 | normal |
| chr07 | 20500001 | 20600000 | 0.059 | 1.117 | normal |
| chr07 | 20600001 | 20700000 | 0.058 | 1.094 | normal |
| chr07 | 20700001 | 20800000 | 0.060 | 1.110 | normal |
| chr07 | 20800001 | 20900000 | 0.041 | 1.052 | normal |
| chr07 | 20900001 | 21000000 | 0.078 | 1.345 | normal |
| chr07 | 21000001 | 21100000 | 0.075 | 1.365 | normal |
| chr07 | 21100001 | 21200000 | 0.078 | 1.086 | normal |
| chr07 | 21200001 | 21300000 | 0.031 | 0.955 | normal |
| chr07 | 21300001 | 21400000 | 0.053 | 0.966 | normal |
| chr07 | 21400001 | 21500000 | 0.026 | 0.974 | normal |
| chr07 | 21500001 | 21600000 | 0.062 | 1.061 | normal |
| chr07 | 21600001 | 21700000 | 0.079 | 0.892 | normal |
| chr07 | 21700001 | 21800000 | 0.056 | 1.082 | normal |
| chr07 | 21800001 | 21900000 | 0.071 | 1.091 | normal |
| chr07 | 21900001 | 22000000 | 0.070 | 1.419 | normal |
| chr07 | 22000001 | 22100000 | 0.050 | 1.059 | normal |
| chr07 | 22100001 | 22200000 | 0.062 | 0.990 | normal |
| chr07 | 22200001 | 22300000 | 0.055 | 1.010 | normal |
| chr07 | 22300001 | 22400000 | 0.064 | 0.746 | normal |
| chr07 | 22400001 | 22500000 | 0.078 | 0.983 | normal |
| chr07 | 22500001 | 22600000 | 0.074 | 0.910 | normal |
| chr07 | 22600001 | 22700000 | 0.063 | 1.055 | normal |

|       |          |          |       |       |        |
|-------|----------|----------|-------|-------|--------|
| chr07 | 22700001 | 22800000 | 0.089 | 0.968 | normal |
| chr07 | 22800001 | 22900000 | 0.053 | 1.065 | normal |
| chr07 | 22900001 | 23000000 | 0.066 | 1.024 | normal |
| chr07 | 23000001 | 23100000 | 0.057 | 1.161 | normal |
| chr07 | 23100001 | 23200000 | 0.057 | 1.246 | normal |
| chr07 | 23200001 | 23300000 | 0.054 | 1.150 | normal |
| chr07 | 23300001 | 23400000 | 0.080 | 1.145 | normal |
| chr07 | 23400001 | 23500000 | 0.013 | 1.326 | normal |
| chr07 | 23500001 | 23600000 | 0.062 | 1.634 | normal |
| chr07 | 23600001 | 23700000 | 0.045 | 1.022 | normal |
| chr07 | 23700001 | 23800000 | 0.049 | 1.053 | normal |
| chr07 | 23800001 | 23900000 | 0.084 | 1.018 | normal |
| chr07 | 23900001 | 24000000 | 0.067 | 1.049 | normal |
| chr07 | 24000001 | 24100000 | 0.069 | 1.194 | normal |
| chr07 | 24100001 | 24200000 | 0.050 | 1.101 | normal |
| chr07 | 24200001 | 24300000 | 0.061 | 1.070 | normal |
| chr07 | 24300001 | 24400000 | 0.081 | 0.895 | normal |
| chr07 | 24400001 | 24500000 | 0.044 | 1.095 | normal |
| chr07 | 24500001 | 24600000 | 0.065 | 1.127 | normal |
| chr07 | 24600001 | 24700000 | 0.073 | 1.214 | normal |
| chr07 | 24700001 | 24800000 | 0.077 | 1.149 | normal |
| chr07 | 24800001 | 24900000 | 0.027 | 0.937 | normal |
| chr07 | 24900001 | 25000000 | 0.048 | 1.070 | normal |
| chr07 | 25000001 | 25100000 | 0.029 | 1.123 | normal |
| chr07 | 25100001 | 25200000 | 0.033 | 1.080 | normal |
| chr07 | 25200001 | 25300000 | 0.056 | 1.010 | normal |
| chr07 | 25300001 | 25400000 | 0.086 | 0.951 | normal |
| chr07 | 25400001 | 25500000 | 0.046 | 0.989 | normal |
| chr07 | 25500001 | 25600000 | 0.038 | 0.932 | normal |
| chr07 | 25600001 | 25700000 | 0.059 | 0.978 | normal |
| chr07 | 25700001 | 25800000 | 0.061 | 0.953 | normal |
| chr07 | 25800001 | 25900000 | 0.029 | 0.981 | normal |
| chr07 | 25900001 | 26000000 | 0.025 | 1.124 | normal |
| chr07 | 26000001 | 26100000 | 0.061 | 0.883 | normal |
| chr07 | 26100001 | 26200000 | 0.084 | 0.926 | normal |
| chr07 | 26200001 | 26300000 | 0.073 | 0.952 | normal |
| chr07 | 26300001 | 26400000 | 0.036 | 1.145 | normal |
| chr07 | 26400001 | 26500000 | 0.094 | 0.867 | normal |
| chr07 | 26500001 | 26600000 | 0.073 | 0.897 | normal |
| chr07 | 26600001 | 26700000 | 0.041 | 0.950 | normal |
| chr07 | 26700001 | 26800000 | 0.065 | 0.886 | normal |
| chr07 | 26800001 | 26900000 | 0.076 | 0.975 | normal |
| chr07 | 26900001 | 27000000 | 0.022 | 1.033 | normal |
| chr07 | 27000001 | 27100000 | 0.047 | 1.138 | normal |



|       |          |          |       |       |        |
|-------|----------|----------|-------|-------|--------|
| chr07 | 27100001 | 27200000 | 0.041 | 1.034 | normal |
| chr07 | 27200001 | 27300000 | 0.028 | 1.051 | normal |
| chr07 | 27300001 | 27400000 | 0.029 | 0.911 | normal |
| chr07 | 27400001 | 27500000 | 0.046 | 1.046 | normal |
| chr07 | 27500001 | 27600000 | 0.052 | 0.930 | normal |
| chr07 | 27600001 | 27700000 | 0.052 | 1.059 | normal |
| chr07 | 27700001 | 27800000 | 0.046 | 1.053 | normal |
| chr07 | 27800001 | 27900000 | 0.041 | 1.112 | normal |
| chr07 | 27900001 | 28000000 | 0.094 | 1.304 | normal |
| chr07 | 28000001 | 28100000 | 0.016 | 0.753 | normal |
| chr07 | 28100001 | 28200000 | 0.023 | 0.937 | normal |
| chr07 | 28200001 | 28300000 | 0.043 | 1.002 | normal |
| chr07 | 28300001 | 28400000 | 0.050 | 0.954 | normal |
| chr07 | 28400001 | 28500000 | 0.092 | 0.877 | normal |
| chr07 | 28500001 | 28600000 | 0.088 | 1.635 | normal |
| chr07 | 28600001 | 28700000 | 0.055 | 1.729 | normal |
| chr07 | 28700001 | 28800000 | 0.029 | 1.218 | normal |
| chr07 | 28800001 | 28900000 | 0.026 | 1.267 | normal |
| chr07 | 28900001 | 29000000 | 0.007 | 1.046 | normal |
| chr07 | 29000001 | 29100000 | 0.016 | 1.071 | normal |
| chr07 | 29100001 | 29200000 | 0.022 | 1.040 | normal |
| chr07 | 29200001 | 29300000 | 0.039 | 0.844 | normal |
| chr07 | 29300001 | 29400000 | 0.028 | 0.905 | normal |
| chr07 | 29400001 | 29500000 | 0.044 | 1.152 | normal |
| chr07 | 29500001 | 29600000 | 0.043 | 1.173 | normal |
| chr07 | 29600001 | 29700000 | 0.058 | 0.939 | normal |
| chr07 | 29700001 | 29800000 | 0.086 | 1.820 | normal |
| chr07 | 29800001 | 29900000 | 0.051 | 1.258 | normal |
| chr07 | 29900001 | 30000000 | 0.073 | 0.963 | normal |
| chr07 | 30000001 | 30100000 | 0.053 | 1.677 | normal |
| chr07 | 30100001 | 30200000 | 0.041 | 1.022 | normal |
| chr07 | 30200001 | 30300000 | 0.042 | 1.082 | normal |
| chr07 | 30300001 | 30400000 | 0.046 | 1.032 | normal |
| chr07 | 30400001 | 30500000 | 0.093 | 0.954 | normal |
| chr07 | 30500001 | 30600000 | 0.058 | 0.928 | normal |
| chr07 | 30600001 | 30700000 | 0.040 | 1.068 | normal |
| chr07 | 30700001 | 30800000 | 0.042 | 1.301 | normal |
| chr07 | 30800001 | 30900000 | 0.043 | 1.204 | normal |
| chr07 | 30900001 | 31000000 | 0.045 | 1.461 | normal |
| chr07 | 31000001 | 31100000 | 0.029 | 1.054 | normal |
| chr07 | 31100001 | 31200000 | 0.055 | 0.833 | normal |
| chr07 | 31200001 | 31300000 | 0.048 | 0.929 | normal |
| chr07 | 31300001 | 31400000 | 0.084 | 0.906 | normal |
| chr07 | 31400001 | 31500000 | 0.025 | 0.893 | normal |

|       |          |          |       |       |        |
|-------|----------|----------|-------|-------|--------|
| chr07 | 31500001 | 31600000 | 0.051 | 1.094 | normal |
| chr07 | 31600001 | 31700000 | 0.029 | 1.118 | normal |
| chr07 | 31700001 | 31800000 | 0.033 | 0.954 | normal |
| chr07 | 31800001 | 31900000 | 0.039 | 1.042 | normal |
| chr07 | 31900001 | 32000000 | 0.087 | 1.893 | normal |
| chr07 | 32000001 | 32100000 | 0.073 | 0.944 | normal |
| chr07 | 32100001 | 32200000 | 0.079 | 0.914 | normal |
| chr07 | 32200001 | 32300000 | 0.167 | 0.434 | normal |
| chr07 | 32300001 | 32400000 | 0.020 | 1.005 | normal |
| chr07 | 32400001 | 32500000 | 0.044 | 1.057 | normal |
| chr07 | 32500001 | 32600000 | 0.162 | 1.408 | normal |
| chr07 | 32600001 | 32700000 | 0.021 | 0.964 | normal |
| chr07 | 32700001 | 32800000 | 0.095 | 1.091 | normal |
| chr07 | 32800001 | 32900000 | 0.052 | 0.912 | normal |
| chr07 | 32900001 | 33000000 | 0.055 | 0.983 | normal |
| chr07 | 33000001 | 33100000 | 0.060 | 0.950 | normal |
| chr07 | 33100001 | 33200000 | 0.033 | 1.082 | normal |
| chr07 | 33200001 | 33300000 | 0.083 | 0.831 | normal |
| chr07 | 33300001 | 33400000 | 0.072 | 0.971 | normal |
| chr07 | 33400001 | 33500000 | 0.056 | 0.879 | normal |
| chr07 | 33500001 | 33600000 | 0.037 | 1.254 | normal |
| chr07 | 33600001 | 33700000 | 0.033 | 0.858 | normal |
| chr07 | 33700001 | 33800000 | 0.015 | 0.916 | normal |
| chr07 | 33800001 | 33900000 | 0.018 | 0.961 | normal |
| chr07 | 33900001 | 34000000 | 0.060 | 0.734 | normal |
| chr07 | 34000001 | 34100000 | 0.068 | 1.296 | normal |
| chr07 | 34100001 | 34200000 | 0.068 | 0.969 | normal |
| chr07 | 34200001 | 34300000 | 0.016 | 0.991 | normal |
| chr07 | 34300001 | 34400000 | 0.038 | 1.117 | normal |
| chr07 | 34400001 | 34500000 | 0.065 | 1.215 | normal |
| chr07 | 34500001 | 34600000 | 0.039 | 0.936 | normal |
| chr07 | 34600001 | 34700000 | 0.043 | 0.958 | normal |
| chr07 | 34700001 | 34800000 | 0.043 | 1.120 | normal |
| chr07 | 34800001 | 34900000 | 0.055 | 0.691 | normal |
| chr07 | 34900001 | 35000000 | 0.036 | 1.050 | normal |
| chr07 | 35000001 | 35100000 | 0.070 | 1.176 | normal |
| chr07 | 35100001 | 35200000 | 0.036 | 1.295 | normal |
| chr07 | 35200001 | 35300000 | 0.047 | 1.195 | normal |
| chr07 | 35300001 | 35400000 | 0.079 | 0.519 | normal |
| chr07 | 35400001 | 35500000 | 0.218 | 0.536 | normal |
| chr07 | 35500001 | 35600000 | 0.065 | 0.906 | normal |
| chr07 | 35600001 | 35700000 | 0.057 | 0.962 | normal |
| chr07 | 35700001 | 35800000 | 0.053 | 1.017 | normal |
| chr07 | 35800001 | 35900000 | 0.033 | 1.055 | normal |

|       |          |          |        |       |        |
|-------|----------|----------|--------|-------|--------|
| chr07 | 35900001 | 36000000 | 0.059  | 1.078 | normal |
| chr07 | 36000001 | 36100000 | 0.059  | 0.845 | normal |
| chr07 | 36100001 | 36200000 | 0.071  | 1.198 | normal |
| chr07 | 36200001 | 36300000 | 0.093  | 1.235 | normal |
| chr07 | 36300001 | 36400000 | 0.049  | 1.005 | normal |
| chr07 | 36400001 | 36500000 | 0.039  | 0.996 | normal |
| chr07 | 36500001 | 36600000 | 0.013  | 0.997 | normal |
| chr07 | 36600001 | 36700000 | -0.001 | 1.009 | normal |
| chr07 | 36700001 | 36800000 | 0.005  | 1.012 | normal |
| chr07 | 36800001 | 36900000 | 0.015  | 0.917 | normal |
| chr07 | 36900001 | 37000000 | 0.019  | 1.122 | normal |
| chr07 | 37000001 | 37100000 | 0.035  | 1.054 | normal |
| chr07 | 37100001 | 37200000 | 0.088  | 0.888 | normal |
| chr07 | 37200001 | 37300000 | 0.037  | 0.941 | normal |
| chr07 | 37300001 | 37400000 | 0.093  | 0.932 | normal |
| chr07 | 37400001 | 37500000 | 0.071  | 1.019 | normal |
| chr07 | 37500001 | 37600000 | 0.006  | 1.029 | normal |
| chr07 | 37600001 | 37700000 | 0.045  | 0.899 | normal |
| chr07 | 37700001 | 37800000 | 0.045  | 0.997 | normal |
| chr07 | 37800001 | 37900000 | 0.065  | 1.167 | normal |
| chr07 | 37900001 | 38000000 | 0.049  | 1.123 | normal |
| chr07 | 38000001 | 38100000 | 0.050  | 1.075 | normal |
| chr07 | 38100001 | 38200000 | 0.055  | 1.086 | normal |
| chr07 | 38200001 | 38300000 | 0.044  | 1.077 | normal |
| chr07 | 38300001 | 38400000 | 0.058  | 0.945 | normal |
| chr07 | 38400001 | 38500000 | 0.064  | 0.971 | normal |
| chr07 | 38500001 | 38600000 | 0.079  | 0.916 | normal |
| chr06 | 1        | 100000   | 0.071  | 1.532 | normal |
| chr06 | 100001   | 200000   | 0.147  | 1.559 | normal |
| chr06 | 200001   | 300000   | 0.060  | 1.363 | normal |
| chr06 | 300001   | 400000   | 0.123  | 1.246 | normal |
| chr06 | 400001   | 500000   | 0.075  | 1.687 | normal |
| chr06 | 500001   | 600000   | 0.061  | 1.215 | normal |
| chr06 | 600001   | 700000   | 0.044  | 1.263 | normal |
| chr06 | 700001   | 800000   | 0.042  | 0.998 | normal |
| chr06 | 800001   | 900000   | 0.016  | 1.045 | normal |
| chr06 | 900001   | 1000000  | 0.012  | 0.938 | normal |
| chr06 | 1000001  | 1100000  | 0.073  | 0.892 | normal |
| chr06 | 1100001  | 1200000  | 0.059  | 1.036 | normal |
| chr06 | 1200001  | 1300000  | 0.030  | 1.036 | normal |
| chr06 | 1300001  | 1400000  | 0.076  | 1.032 | normal |
| chr06 | 1400001  | 1500000  | 0.082  | 0.866 | normal |
| chr06 | 1500001  | 1600000  | 0.092  | 1.885 | normal |
| chr06 | 1600001  | 1700000  | 0.050  | 0.990 | normal |

|       |         |         |       |       |        |
|-------|---------|---------|-------|-------|--------|
| chr06 | 1700001 | 1800000 | 0.061 | 1.021 | normal |
| chr06 | 1800001 | 1900000 | 0.024 | 1.031 | normal |
| chr06 | 1900001 | 2000000 | 0.022 | 1.090 | normal |
| chr06 | 2000001 | 2100000 | 0.037 | 1.040 | normal |
| chr06 | 2100001 | 2200000 | 0.060 | 1.075 | normal |
| chr06 | 2200001 | 2300000 | 0.063 | 1.095 | normal |
| chr06 | 2300001 | 2400000 | 0.065 | 0.900 | normal |
| chr06 | 2400001 | 2500000 | 0.030 | 1.214 | normal |
| chr06 | 2500001 | 2600000 | 0.021 | 1.055 | normal |
| chr06 | 2600001 | 2700000 | 0.077 | 0.920 | normal |
| chr06 | 2700001 | 2800000 | 0.133 | 0.862 | normal |
| chr06 | 2800001 | 2900000 | 0.061 | 1.165 | normal |
| chr06 | 2900001 | 3000000 | 0.071 | 1.171 | normal |
| chr06 | 3000001 | 3100000 | 0.053 | 0.856 | normal |
| chr06 | 3100001 | 3200000 | 0.042 | 0.794 | normal |
| chr06 | 3200001 | 3300000 | 0.045 | 1.027 | normal |
| chr06 | 3300001 | 3400000 | 0.076 | 1.000 | normal |
| chr06 | 3400001 | 3500000 | 0.114 | 0.774 | normal |
| chr06 | 3500001 | 3600000 | 0.074 | 0.805 | normal |
| chr06 | 3600001 | 3700000 | 0.109 | 0.555 | normal |
| chr06 | 3700001 | 3800000 | 0.139 | 0.912 | normal |
| chr06 | 3800001 | 3900000 | 0.144 | 1.657 | normal |
| chr06 | 3900001 | 4000000 | 0.139 | 1.271 | normal |
| chr06 | 4000001 | 4100000 | 0.192 | 1.130 | normal |
| chr06 | 4100001 | 4200000 | 0.133 | 1.711 | normal |
| chr06 | 4200001 | 4300000 | 0.122 | 1.951 | normal |
| chr06 | 4300001 | 4400000 | 0.116 | 1.948 | normal |
| chr06 | 4400001 | 4500000 | 0.074 | 1.826 | normal |
| chr06 | 4500001 | 4600000 | 0.055 | 1.453 | normal |
| chr06 | 4600001 | 4700000 | 0.121 | 1.234 | normal |
| chr06 | 4700001 | 4800000 | 0.058 | 1.066 | normal |
| chr06 | 4800001 | 4900000 | 0.066 | 0.951 | normal |
| chr06 | 4900001 | 5000000 | 0.204 | 0.703 | normal |
| chr06 | 5000001 | 5100000 | 0.077 | 0.977 | normal |
| chr06 | 5100001 | 5200000 | 0.038 | 1.355 | normal |
| chr06 | 5200001 | 5300000 | 0.032 | 0.944 | normal |
| chr06 | 5300001 | 5400000 | 0.028 | 0.963 | normal |
| chr06 | 5400001 | 5500000 | 0.045 | 0.995 | normal |
| chr06 | 5500001 | 5600000 | 0.022 | 1.003 | normal |
| chr06 | 5600001 | 5700000 | 0.030 | 1.031 | normal |
| chr06 | 5700001 | 5800000 | 0.024 | 0.943 | normal |
| chr06 | 5800001 | 5900000 | 0.034 | 1.088 | normal |
| chr06 | 5900001 | 6000000 | 0.090 | 1.096 | normal |
| chr06 | 6000001 | 6100000 | 0.059 | 1.071 | normal |

|       |          |          |       |       |        |
|-------|----------|----------|-------|-------|--------|
| chr06 | 6100001  | 6200000  | 0.123 | 0.695 | normal |
| chr06 | 6200001  | 6300000  | 0.091 | 0.924 | normal |
| chr06 | 6300001  | 6400000  | 0.109 | 1.024 | normal |
| chr06 | 6400001  | 6500000  | 0.074 | 0.978 | normal |
| chr06 | 6500001  | 6600000  | 0.048 | 1.046 | normal |
| chr06 | 6600001  | 6700000  | 0.100 | 1.239 | normal |
| chr06 | 6700001  | 6800000  | 0.072 | 0.957 | normal |
| chr06 | 6800001  | 6900000  | 0.060 | 0.970 | normal |
| chr06 | 6900001  | 7000000  | 0.097 | 1.304 | normal |
| chr06 | 7000001  | 7100000  | 0.070 | 0.875 | normal |
| chr06 | 7100001  | 7200000  | 0.100 | 1.248 | normal |
| chr06 | 7200001  | 7300000  | 0.093 | 1.203 | normal |
| chr06 | 7300001  | 7400000  | 0.081 | 1.606 | normal |
| chr06 | 7400001  | 7500000  | 0.055 | 1.300 | normal |
| chr06 | 7500001  | 7600000  | 0.055 | 1.117 | normal |
| chr06 | 7600001  | 7700000  | 0.083 | 0.981 | normal |
| chr06 | 7700001  | 7800000  | 0.016 | 0.987 | normal |
| chr06 | 7800001  | 7900000  | 0.025 | 1.019 | normal |
| chr06 | 7900001  | 8000000  | 0.079 | 1.007 | normal |
| chr06 | 8000001  | 8100000  | 0.069 | 0.934 | normal |
| chr06 | 8100001  | 8200000  | 0.101 | 1.202 | normal |
| chr06 | 8200001  | 8300000  | 0.043 | 1.296 | normal |
| chr06 | 8300001  | 8400000  | 0.069 | 1.150 | normal |
| chr06 | 8400001  | 8500000  | 0.138 | 0.863 | normal |
| chr06 | 8500001  | 8600000  | 0.069 | 1.053 | normal |
| chr06 | 8600001  | 8700000  | 0.068 | 0.893 | normal |
| chr06 | 8700001  | 8800000  | 0.082 | 1.011 | normal |
| chr06 | 8800001  | 8900000  | 0.183 | 0.687 | normal |
| chr06 | 8900001  | 9000000  | 0.153 | 1.078 | normal |
| chr06 | 9000001  | 9100000  | 0.057 | 1.546 | normal |
| chr06 | 9100001  | 9200000  | 0.070 | 1.029 | normal |
| chr06 | 9200001  | 9300000  | 0.085 | 1.797 | normal |
| chr06 | 9300001  | 9400000  | 0.102 | 1.113 | normal |
| chr06 | 9400001  | 9500000  | 0.072 | 1.240 | normal |
| chr06 | 9500001  | 9600000  | 0.125 | 0.923 | normal |
| chr06 | 9600001  | 9700000  | 0.212 | 0.555 | normal |
| chr06 | 9700001  | 9800000  | 0.197 | 0.494 | normal |
| chr06 | 9800001  | 9900000  | 0.106 | 0.684 | normal |
| chr06 | 9900001  | 10000000 | 0.135 | 0.734 | normal |
| chr06 | 10000001 | 10100000 | 0.098 | 0.908 | normal |
| chr06 | 10100001 | 10200000 | 0.076 | 0.892 | normal |
| chr06 | 10200001 | 10300000 | 0.067 | 0.913 | normal |
| chr06 | 10300001 | 10400000 | 0.070 | 0.864 | normal |
| chr06 | 10400001 | 10500000 | 0.116 | 0.736 | normal |

|       |          |          |       |       |        |
|-------|----------|----------|-------|-------|--------|
| chr06 | 10500001 | 10600000 | 0.129 | 0.730 | normal |
| chr06 | 10600001 | 10700000 | 0.090 | 0.869 | normal |
| chr06 | 10700001 | 10800000 | 0.126 | 0.699 | normal |
| chr06 | 10800001 | 10900000 | 0.110 | 0.843 | normal |
| chr06 | 10900001 | 11000000 | 0.094 | 0.802 | normal |
| chr06 | 11000001 | 11100000 | 0.102 | 0.644 | normal |
| chr06 | 11100001 | 11200000 | 0.091 | 0.822 | normal |
| chr06 | 11200001 | 11300000 | 0.120 | 1.176 | normal |
| chr06 | 11300001 | 11400000 | 0.076 | 1.012 | normal |
| chr06 | 11400001 | 11500000 | 0.145 | 1.175 | normal |
| chr06 | 11500001 | 11600000 | 0.194 | 1.248 | normal |
| chr06 | 11600001 | 11700000 | 0.168 | 1.535 | sig    |
| chr06 | 11700001 | 11800000 | 0.107 | 1.384 | normal |
| chr06 | 11800001 | 11900000 | 0.116 | 0.905 | normal |
| chr06 | 11900001 | 12000000 | 0.113 | 1.274 | normal |
| chr06 | 12000001 | 12100000 | 0.042 | 0.879 | normal |
| chr06 | 12100001 | 12200000 | 0.074 | 0.918 | normal |
| chr06 | 12200001 | 12300000 | 0.111 | 0.823 | normal |
| chr06 | 12300001 | 12400000 | 0.160 | 0.687 | normal |
| chr06 | 12400001 | 12500000 | 0.095 | 1.032 | normal |
| chr06 | 12500001 | 12600000 | 0.047 | 1.459 | normal |
| chr06 | 12600001 | 12700000 | 0.048 | 1.472 | normal |
| chr06 | 12700001 | 12800000 | 0.085 | 2.469 | normal |
| chr06 | 12800001 | 12900000 | 0.109 | 0.955 | normal |
| chr06 | 12900001 | 13000000 | 0.167 | 0.609 | normal |
| chr06 | 13000001 | 13100000 | 0.119 | 1.086 | normal |
| chr06 | 13100001 | 13200000 | 0.110 | 1.078 | normal |
| chr06 | 13200001 | 13300000 | 0.105 | 0.907 | normal |
| chr06 | 13300001 | 13400000 | 0.082 | 0.956 | normal |
| chr06 | 13400001 | 13500000 | 0.049 | 1.190 | normal |
| chr06 | 13500001 | 13600000 | 0.063 | 1.405 | normal |
| chr06 | 13600001 | 13700000 | 0.157 | 0.821 | normal |
| chr06 | 13700001 | 13800000 | 0.222 | 0.662 | normal |
| chr06 | 13800001 | 13900000 | 0.162 | 0.920 | normal |
| chr06 | 13900001 | 14000000 | 0.173 | 1.174 | normal |
| chr06 | 14000001 | 14100000 | 0.146 | 0.824 | normal |
| chr06 | 14100001 | 14200000 | 0.029 | 1.125 | normal |
| chr06 | 14200001 | 14300000 | 0.095 | 1.718 | normal |
| chr06 | 14300001 | 14400000 | 0.074 | 1.074 | normal |
| chr06 | 14400001 | 14500000 | 0.074 | 0.902 | normal |
| chr06 | 14500001 | 14600000 | 0.023 | 1.080 | normal |
| chr06 | 14600001 | 14700000 | 0.046 | 1.015 | normal |
| chr06 | 14700001 | 14800000 | 0.070 | 0.888 | normal |
| chr06 | 14800001 | 14900000 | 0.027 | 1.045 | normal |

|       |          |          |       |       |        |
|-------|----------|----------|-------|-------|--------|
| chr06 | 14900001 | 15000000 | 0.026 | 1.036 | normal |
| chr06 | 15000001 | 15100000 | 0.019 | 1.073 | normal |
| chr06 | 15100001 | 15200000 | 0.160 | 0.536 | normal |
| chr06 | 15200001 | 15300000 | 0.085 | 2.080 | normal |
| chr06 | 15300001 | 15400000 | 0.093 | 0.877 | normal |
| chr06 | 15400001 | 15500000 | 0.091 | 0.987 | normal |
| chr06 | 15500001 | 15600000 | 0.146 | 0.595 | normal |
| chr06 | 15600001 | 15700000 | 0.068 | 0.819 | normal |
| chr06 | 15700001 | 15800000 | 0.090 | 1.204 | normal |
| chr06 | 15800001 | 15900000 | 0.068 | 1.121 | normal |
| chr06 | 15900001 | 16000000 | 0.072 | 0.782 | normal |
| chr06 | 16000001 | 16100000 | 0.092 | 0.955 | normal |
| chr06 | 16100001 | 16200000 | 0.077 | 0.559 | normal |
| chr06 | 16200001 | 16300000 | 0.064 | 1.378 | normal |
| chr06 | 16300001 | 16400000 | 0.129 | 1.470 | normal |
| chr06 | 16400001 | 16500000 | 0.118 | 1.500 | normal |
| chr06 | 16500001 | 16600000 | 0.074 | 1.060 | normal |
| chr06 | 16600001 | 16700000 | 0.093 | 0.785 | normal |
| chr06 | 16700001 | 16800000 | 0.108 | 0.651 | normal |
| chr06 | 16800001 | 16900000 | 0.131 | 0.809 | normal |
| chr06 | 16900001 | 17000000 | 0.100 | 0.694 | normal |
| chr06 | 17000001 | 17100000 | 0.251 | 1.265 | normal |
| chr06 | 17100001 | 17200000 | 0.114 | 1.125 | normal |
| chr06 | 17200001 | 17300000 | 0.125 | 1.036 | normal |
| chr06 | 17300001 | 17400000 | 0.039 | 1.021 | normal |
| chr06 | 17400001 | 17500000 | 0.043 | 0.942 | normal |
| chr06 | 17500001 | 17600000 | 0.032 | 0.889 | normal |
| chr06 | 17600001 | 17700000 | 0.095 | 0.864 | normal |
| chr06 | 17700001 | 17800000 | 0.081 | 0.741 | normal |
| chr06 | 17800001 | 17900000 | 0.106 | 0.969 | normal |
| chr06 | 17900001 | 18000000 | 0.089 | 0.810 | normal |
| chr06 | 18000001 | 18100000 | 0.088 | 0.967 | normal |
| chr06 | 18100001 | 18200000 | 0.143 | 0.803 | normal |
| chr06 | 18200001 | 18300000 | 0.091 | 0.886 | normal |
| chr06 | 18300001 | 18400000 | 0.026 | 0.917 | normal |
| chr06 | 18400001 | 18500000 | 0.062 | 0.894 | normal |
| chr06 | 18500001 | 18600000 | 0.098 | 1.016 | normal |
| chr06 | 18600001 | 18700000 | 0.098 | 0.938 | normal |
| chr06 | 18700001 | 18800000 | 0.089 | 0.876 | normal |
| chr06 | 18800001 | 18900000 | 0.140 | 0.846 | normal |
| chr06 | 18900001 | 19000000 | 0.093 | 1.069 | normal |
| chr06 | 19000001 | 19100000 | 0.142 | 1.322 | normal |
| chr06 | 19100001 | 19200000 | 0.086 | 1.152 | normal |
| chr06 | 19200001 | 19300000 | 0.097 | 0.989 | normal |

|       |          |          |       |       |        |
|-------|----------|----------|-------|-------|--------|
| chr06 | 19300001 | 19400000 | 0.086 | 0.910 | normal |
| chr06 | 19400001 | 19500000 | 0.093 | 1.087 | normal |
| chr06 | 19500001 | 19600000 | 0.107 | 1.112 | normal |
| chr06 | 19600001 | 19700000 | 0.073 | 0.973 | normal |
| chr06 | 19700001 | 19800000 | 0.095 | 1.669 | normal |
| chr06 | 19800001 | 19900000 | 0.179 | 0.683 | normal |
| chr06 | 19900001 | 20000000 | 0.138 | 2.453 | normal |
| chr06 | 20000001 | 20100000 | 0.076 | 1.134 | normal |
| chr06 | 20100001 | 20200000 | 0.068 | 1.055 | normal |
| chr06 | 20200001 | 20300000 | 0.126 | 0.848 | normal |
| chr06 | 20300001 | 20400000 | 0.194 | 1.391 | normal |
| chr06 | 20400001 | 20500000 | 0.265 | 1.789 | sig    |
| chr06 | 20500001 | 20600000 | 0.127 | 0.907 | normal |
| chr06 | 20600001 | 20700000 | 0.129 | 0.811 | normal |
| chr06 | 20700001 | 20800000 | 0.094 | 0.975 | normal |
| chr06 | 20800001 | 20900000 | 0.039 | 1.036 | normal |
| chr06 | 20900001 | 21000000 | 0.145 | 0.909 | normal |
| chr06 | 21000001 | 21100000 | 0.095 | 1.206 | normal |
| chr06 | 21100001 | 21200000 | 0.086 | 0.854 | normal |
| chr06 | 21200001 | 21300000 | 0.052 | 0.929 | normal |
| chr06 | 21300001 | 21400000 | 0.112 | 1.358 | normal |
| chr06 | 21400001 | 21500000 | 0.078 | 1.044 | normal |
| chr06 | 21500001 | 21600000 | 0.055 | 1.007 | normal |
| chr06 | 21600001 | 21700000 | 0.064 | 1.128 | normal |
| chr06 | 21700001 | 21800000 | 0.082 | 0.982 | normal |
| chr06 | 21800001 | 21900000 | 0.113 | 0.883 | normal |
| chr06 | 21900001 | 22000000 | 0.101 | 0.927 | normal |
| chr06 | 22000001 | 22100000 | 0.146 | 1.268 | normal |
| chr06 | 22100001 | 22200000 | 0.121 | 1.148 | normal |
| chr06 | 22200001 | 22300000 | 0.088 | 1.001 | normal |
| chr06 | 22300001 | 22400000 | 0.065 | 0.979 | normal |
| chr06 | 22400001 | 22500000 | 0.129 | 1.123 | normal |
| chr06 | 22500001 | 22600000 | 0.049 | 1.001 | normal |
| chr06 | 22600001 | 22700000 | 0.095 | 0.823 | normal |
| chr06 | 22700001 | 22800000 | 0.067 | 1.000 | normal |
| chr06 | 22800001 | 22900000 | 0.047 | 0.931 | normal |
| chr06 | 22900001 | 23000000 | 0.099 | 1.602 | normal |
| chr06 | 23000001 | 23100000 | 0.133 | 1.231 | normal |
| chr06 | 23100001 | 23200000 | 0.174 | 1.317 | normal |
| chr06 | 23200001 | 23300000 | 0.081 | 1.349 | normal |
| chr06 | 23300001 | 23400000 | 0.041 | 1.172 | normal |
| chr06 | 23400001 | 23500000 | 0.019 | 1.076 | normal |
| chr06 | 23500001 | 23600000 | 0.030 | 0.946 | normal |
| chr06 | 23600001 | 23700000 | 0.160 | 0.737 | normal |



|       |          |          |       |       |        |
|-------|----------|----------|-------|-------|--------|
| chr06 | 23700001 | 23800000 | 0.126 | 1.425 | normal |
| chr06 | 23800001 | 23900000 | 0.100 | 0.969 | normal |
| chr06 | 23900001 | 24000000 | 0.117 | 1.016 | normal |
| chr06 | 24000001 | 24100000 | 0.158 | 0.704 | normal |
| chr06 | 24100001 | 24200000 | 0.170 | 0.759 | normal |
| chr06 | 24200001 | 24300000 | 0.057 | 1.018 | normal |
| chr06 | 24300001 | 24400000 | 0.097 | 0.963 | normal |
| chr06 | 24400001 | 24500000 | 0.179 | 0.885 | normal |
| chr06 | 24500001 | 24600000 | 0.225 | 0.857 | normal |
| chr06 | 24600001 | 24700000 | 0.180 | 0.772 | normal |
| chr06 | 24700001 | 24800000 | 0.212 | 0.424 | normal |
| chr06 | 24800001 | 24900000 | 0.111 | 0.782 | normal |
| chr06 | 24900001 | 25000000 | 0.040 | 0.983 | normal |
| chr06 | 25000001 | 25100000 | 0.084 | 0.824 | normal |
| chr06 | 25100001 | 25200000 | 0.132 | 0.640 | normal |
| chr06 | 25200001 | 25300000 | 0.123 | 1.703 | normal |
| chr06 | 25300001 | 25400000 | 0.055 | 1.402 | normal |
| chr06 | 25400001 | 25500000 | 0.064 | 1.108 | normal |
| chr06 | 25500001 | 25600000 | 0.053 | 1.041 | normal |
| chr06 | 25600001 | 25700000 | 0.057 | 0.985 | normal |
| chr06 | 25700001 | 25800000 | 0.232 | 1.424 | normal |
| chr06 | 25800001 | 25900000 | 0.053 | 1.213 | normal |
| chr06 | 25900001 | 26000000 | 0.135 | 0.610 | normal |
| chr06 | 26000001 | 26100000 | 0.067 | 0.716 | normal |
| chr06 | 26100001 | 26200000 | 0.063 | 0.840 | normal |
| chr06 | 26200001 | 26300000 | 0.156 | 0.651 | normal |
| chr06 | 26300001 | 26400000 | 0.109 | 1.516 | normal |
| chr06 | 26400001 | 26500000 | 0.098 | 1.806 | normal |
| chr06 | 26500001 | 26600000 | 0.088 | 1.080 | normal |
| chr06 | 26600001 | 26700000 | 0.075 | 1.144 | normal |
| chr06 | 26700001 | 26800000 | 0.127 | 0.999 | normal |
| chr06 | 26800001 | 26900000 | 0.148 | 1.058 | normal |
| chr06 | 26900001 | 27000000 | 0.142 | 0.966 | normal |
| chr06 | 27000001 | 27100000 | 0.167 | 1.008 | normal |
| chr06 | 27100001 | 27200000 | 0.146 | 1.203 | normal |
| chr06 | 27200001 | 27300000 | 0.129 | 1.744 | normal |
| chr06 | 27300001 | 27400000 | 0.048 | 1.405 | normal |
| chr06 | 27400001 | 27500000 | 0.059 | 1.033 | normal |
| chr06 | 27500001 | 27600000 | 0.107 | 1.157 | normal |
| chr06 | 27600001 | 27700000 | 0.033 | 1.697 | normal |
| chr06 | 27700001 | 27800000 | 0.139 | 0.806 | normal |
| chr06 | 27800001 | 27900000 | 0.207 | 0.372 | normal |
| chr06 | 27900001 | 28000000 | 0.129 | 0.969 | normal |
| chr06 | 28000001 | 28100000 | 0.135 | 1.128 | normal |

|       |          |          |       |       |        |
|-------|----------|----------|-------|-------|--------|
| chr06 | 28100001 | 28200000 | 0.150 | 0.969 | normal |
| chr06 | 28200001 | 28300000 | 0.143 | 1.451 | normal |
| chr06 | 28300001 | 28400000 | 0.048 | 1.053 | normal |
| chr06 | 28400001 | 28500000 | 0.121 | 1.180 | normal |
| chr06 | 28500001 | 28600000 | 0.130 | 1.190 | normal |
| chr06 | 28600001 | 28700000 | 0.256 | 0.551 | normal |
| chr06 | 28700001 | 28800000 | 0.093 | 0.926 | normal |
| chr06 | 28800001 | 28900000 | 0.131 | 1.506 | normal |
| chr06 | 28900001 | 29000000 | 0.113 | 0.831 | normal |
| chr06 | 29000001 | 29100000 | 0.088 | 1.175 | normal |
| chr06 | 29100001 | 29200000 | 0.082 | 1.340 | normal |
| chr06 | 29200001 | 29300000 | 0.061 | 1.093 | normal |
| chr06 | 29300001 | 29400000 | 0.071 | 0.937 | normal |
| chr06 | 29400001 | 29500000 | 0.090 | 0.985 | normal |
| chr06 | 29500001 | 29600000 | 0.217 | 0.870 | normal |
| chr06 | 29600001 | 29700000 | 0.095 | 1.114 | normal |
| chr06 | 29700001 | 29800000 | 0.180 | 1.705 | sig    |
| chr06 | 29800001 | 29900000 | 0.157 | 1.008 | normal |
| chr06 | 29900001 | 30000000 | 0.153 | 1.193 | normal |
| chr06 | 30000001 | 30100000 | 0.077 | 0.851 | normal |
| chr06 | 30100001 | 30200000 | 0.087 | 1.392 | normal |
| chr06 | 30200001 | 30300000 | 0.135 | 0.918 | normal |
| chr06 | 30300001 | 30400000 | 0.057 | 1.154 | normal |
| chr06 | 30400001 | 30500000 | 0.043 | 1.212 | normal |
| chr06 | 30500001 | 30600000 | 0.121 | 1.256 | normal |
| chr06 | 30600001 | 30700000 | 0.082 | 1.584 | normal |
| chr06 | 30700001 | 30800000 | 0.185 | 1.158 | normal |
| chr06 | 30800001 | 30900000 | 0.136 | 0.910 | normal |
| chr06 | 30900001 | 31000000 | 0.019 | 1.341 | normal |
| chr06 | 31000001 | 31100000 | 0.070 | 1.399 | normal |
| chr06 | 31100001 | 31200000 | 0.161 | 1.857 | sig    |
| chr06 | 31200001 | 31300000 | 0.143 | 0.989 | normal |
| chr06 | 31300001 | 31400000 | 0.106 | 1.325 | normal |
| chr06 | 31400001 | 31500000 | 0.109 | 0.809 | normal |
| chr06 | 31500001 | 31600000 | 0.145 | 1.153 | normal |
| chr06 | 31600001 | 31700000 | 0.159 | 1.220 | normal |
| chr06 | 31700001 | 31800000 | 0.083 | 1.522 | normal |
| chr06 | 31800001 | 31900000 | 0.092 | 1.586 | normal |
| chr06 | 31900001 | 32000000 | 0.024 | 1.176 | normal |
| chr06 | 32000001 | 32100000 | 0.094 | 1.441 | normal |
| chr06 | 32100001 | 32200000 | 0.227 | 0.693 | normal |
| chr06 | 32200001 | 32300000 | 0.136 | 1.228 | normal |
| chr06 | 32300001 | 32400000 | 0.097 | 1.111 | normal |
| chr06 | 32400001 | 32500000 | 0.128 | 1.254 | normal |

|       |          |          |       |       |        |
|-------|----------|----------|-------|-------|--------|
| chr06 | 32500001 | 32600000 | 0.123 | 1.260 | normal |
| chr06 | 32600001 | 32700000 | 0.171 | 1.352 | normal |
| chr06 | 32700001 | 32800000 | 0.180 | 1.293 | normal |
| chr06 | 32800001 | 32900000 | 0.138 | 1.349 | normal |
| chr06 | 32900001 | 33000000 | 0.088 | 1.486 | normal |
| chr06 | 33000001 | 33100000 | 0.056 | 1.643 | normal |
| chr06 | 33100001 | 33200000 | 0.087 | 1.630 | normal |
| chr06 | 33200001 | 33300000 | 0.140 | 0.976 | normal |
| chr06 | 33300001 | 33400000 | 0.159 | 0.859 | normal |
| chr06 | 33400001 | 33500000 | 0.076 | 1.413 | normal |
| chr06 | 33500001 | 33600000 | 0.025 | 1.045 | normal |
| chr06 | 33600001 | 33700000 | 0.054 | 1.064 | normal |
| chr06 | 33700001 | 33800000 | 0.052 | 1.128 | normal |
| chr06 | 33800001 | 33900000 | 0.210 | 1.218 | normal |
| chr06 | 33900001 | 34000000 | 0.077 | 1.006 | normal |
| chr06 | 34000001 | 34100000 | 0.028 | 0.982 | normal |
| chr06 | 34100001 | 34200000 | 0.022 | 0.985 | normal |
| chr06 | 34200001 | 34300000 | 0.019 | 0.993 | normal |
| chr06 | 34300001 | 34400000 | 0.127 | 1.376 | normal |
| chr06 | 34400001 | 34500000 | 0.075 | 1.050 | normal |
| chr06 | 34500001 | 34600000 | 0.057 | 1.039 | normal |
| chr06 | 34600001 | 34700000 | 0.079 | 1.049 | normal |
| chr06 | 34700001 | 34800000 | 0.062 | 1.045 | normal |
| chr06 | 34800001 | 34900000 | 0.054 | 1.325 | normal |
| chr06 | 34900001 | 35000000 | 0.069 | 1.456 | normal |
| chr06 | 35000001 | 35100000 | 0.122 | 1.035 | normal |
| chr06 | 35100001 | 35200000 | 0.147 | 1.021 | normal |
| chr06 | 35200001 | 35300000 | 0.080 | 1.009 | normal |
| chr06 | 35300001 | 35400000 | 0.078 | 1.065 | normal |
| chr06 | 35400001 | 35500000 | 0.101 | 1.217 | normal |
| chr06 | 35500001 | 35600000 | 0.057 | 1.083 | normal |
| chr06 | 35600001 | 35700000 | 0.034 | 1.108 | normal |
| chr06 | 35700001 | 35800000 | 0.065 | 1.047 | normal |
| chr06 | 35800001 | 35900000 | 0.081 | 1.118 | normal |
| chr06 | 35900001 | 36000000 | 0.107 | 0.866 | normal |
| chr06 | 36000001 | 36100000 | 0.117 | 1.102 | normal |
| chr06 | 36100001 | 36200000 | 0.063 | 1.124 | normal |
| chr06 | 36200001 | 36300000 | 0.089 | 1.079 | normal |
| chr06 | 36300001 | 36400000 | 0.112 | 0.734 | normal |
| chr01 | 1        | 100000   | 0.135 | 0.797 | normal |
| chr01 | 100001   | 200000   | 0.115 | 0.845 | normal |
| chr01 | 200001   | 300000   | 0.074 | 1.095 | normal |
| chr01 | 300001   | 400000   | 0.102 | 1.129 | normal |
| chr01 | 400001   | 500000   | 0.068 | 1.057 | normal |

|       |         |         |       |       |        |
|-------|---------|---------|-------|-------|--------|
| chr01 | 500001  | 600000  | 0.066 | 0.946 | normal |
| chr01 | 600001  | 700000  | 0.097 | 0.829 | normal |
| chr01 | 700001  | 800000  | 0.093 | 0.855 | normal |
| chr01 | 800001  | 900000  | 0.075 | 1.111 | normal |
| chr01 | 900001  | 1000000 | 0.102 | 0.898 | normal |
| chr01 | 1000001 | 1100000 | 0.044 | 1.117 | normal |
| chr01 | 1100001 | 1200000 | 0.041 | 0.867 | normal |
| chr01 | 1200001 | 1300000 | 0.111 | 0.775 | normal |
| chr01 | 1300001 | 1400000 | 0.058 | 0.940 | normal |
| chr01 | 1400001 | 1500000 | 0.042 | 0.937 | normal |
| chr01 | 1500001 | 1600000 | 0.095 | 0.743 | normal |
| chr01 | 1600001 | 1700000 | 0.006 | 1.282 | normal |
| chr01 | 1700001 | 1800000 | 0.009 | 0.815 | normal |
| chr01 | 1800001 | 1900000 | 0.066 | 1.075 | normal |
| chr01 | 1900001 | 2000000 | 0.078 | 1.011 | normal |
| chr01 | 2000001 | 2100000 | 0.055 | 1.008 | normal |
| chr01 | 2100001 | 2200000 | 0.035 | 1.051 | normal |
| chr01 | 2200001 | 2300000 | 0.036 | 1.002 | normal |
| chr01 | 2300001 | 2400000 | 0.025 | 0.941 | normal |
| chr01 | 2400001 | 2500000 | 0.032 | 1.131 | normal |
| chr01 | 2500001 | 2600000 | 0.038 | 1.180 | normal |
| chr01 | 2600001 | 2700000 | 0.041 | 1.078 | normal |
| chr01 | 2700001 | 2800000 | 0.039 | 1.075 | normal |
| chr01 | 2800001 | 2900000 | 0.057 | 0.892 | normal |
| chr01 | 2900001 | 3000000 | 0.070 | 0.791 | normal |
| chr01 | 3000001 | 3100000 | 0.071 | 1.052 | normal |
| chr01 | 3100001 | 3200000 | 0.054 | 0.967 | normal |
| chr01 | 3200001 | 3300000 | 0.054 | 1.221 | normal |
| chr01 | 3300001 | 3400000 | 0.008 | 0.942 | normal |
| chr01 | 3400001 | 3500000 | 0.052 | 0.881 | normal |
| chr01 | 3500001 | 3600000 | 0.084 | 1.253 | normal |
| chr01 | 3600001 | 3700000 | 0.048 | 1.019 | normal |
| chr01 | 3700001 | 3800000 | 0.094 | 1.192 | normal |
| chr01 | 3800001 | 3900000 | 0.074 | 1.286 | normal |
| chr01 | 3900001 | 4000000 | 0.053 | 0.872 | normal |
| chr01 | 4000001 | 4100000 | 0.027 | 0.792 | normal |
| chr01 | 4100001 | 4200000 | 0.065 | 1.191 | normal |
| chr01 | 4200001 | 4300000 | 0.043 | 1.020 | normal |
| chr01 | 4300001 | 4400000 | 0.065 | 1.467 | normal |
| chr01 | 4400001 | 4500000 | 0.137 | 0.876 | normal |
| chr01 | 4500001 | 4600000 | 0.032 | 1.129 | normal |
| chr01 | 4600001 | 4700000 | 0.082 | 1.143 | normal |
| chr01 | 4700001 | 4800000 | 0.045 | 1.085 | normal |
| chr01 | 4800001 | 4900000 | 0.059 | 0.987 | normal |

|       |         |         |       |       |        |
|-------|---------|---------|-------|-------|--------|
| chr01 | 4900001 | 5000000 | 0.040 | 0.963 | normal |
| chr01 | 5000001 | 5100000 | 0.115 | 0.592 | normal |
| chr01 | 5100001 | 5200000 | 0.137 | 1.264 | normal |
| chr01 | 5200001 | 5300000 | 0.101 | 0.661 | normal |
| chr01 | 5300001 | 5400000 | 0.077 | 0.982 | normal |
| chr01 | 5400001 | 5500000 | 0.100 | 1.170 | normal |
| chr01 | 5500001 | 5600000 | 0.094 | 0.960 | normal |
| chr01 | 5600001 | 5700000 | 0.063 | 1.067 | normal |
| chr01 | 5700001 | 5800000 | 0.124 | 1.621 | normal |
| chr01 | 5800001 | 5900000 | 0.041 | 0.693 | normal |
| chr01 | 5900001 | 6000000 | 0.050 | 1.084 | normal |
| chr01 | 6000001 | 6100000 | 0.054 | 1.022 | normal |
| chr01 | 6100001 | 6200000 | 0.082 | 1.213 | normal |
| chr01 | 6200001 | 6300000 | 0.066 | 1.035 | normal |
| chr01 | 6300001 | 6400000 | 0.067 | 1.199 | normal |
| chr01 | 6400001 | 6500000 | 0.194 | 1.335 | normal |
| chr01 | 6500001 | 6600000 | 0.079 | 1.118 | normal |
| chr01 | 6600001 | 6700000 | 0.086 | 1.057 | normal |
| chr01 | 6700001 | 6800000 | 0.062 | 0.900 | normal |
| chr01 | 6800001 | 6900000 | 0.113 | 0.710 | normal |
| chr01 | 6900001 | 7000000 | 0.060 | 0.792 | normal |
| chr01 | 7000001 | 7100000 | 0.059 | 0.864 | normal |
| chr01 | 7100001 | 7200000 | 0.029 | 0.976 | normal |
| chr01 | 7200001 | 7300000 | 0.080 | 0.672 | normal |
| chr01 | 7300001 | 7400000 | 0.026 | 0.962 | normal |
| chr01 | 7400001 | 7500000 | 0.071 | 0.915 | normal |
| chr01 | 7500001 | 7600000 | 0.051 | 0.904 | normal |
| chr01 | 7600001 | 7700000 | 0.046 | 0.883 | normal |
| chr01 | 7700001 | 7800000 | 0.062 | 0.855 | normal |
| chr01 | 7800001 | 7900000 | 0.041 | 1.114 | normal |
| chr01 | 7900001 | 8000000 | 0.078 | 1.541 | normal |
| chr01 | 8000001 | 8100000 | 0.079 | 1.304 | normal |
| chr01 | 8100001 | 8200000 | 0.066 | 0.840 | normal |
| chr01 | 8200001 | 8300000 | 0.148 | 1.224 | normal |
| chr01 | 8300001 | 8400000 | 0.132 | 0.889 | normal |
| chr01 | 8400001 | 8500000 | 0.089 | 0.895 | normal |
| chr01 | 8500001 | 8600000 | 0.166 | 0.800 | normal |
| chr01 | 8600001 | 8700000 | 0.039 | 0.995 | normal |
| chr01 | 8700001 | 8800000 | 0.041 | 0.894 | normal |
| chr01 | 8800001 | 8900000 | 0.222 | 0.523 | normal |
| chr01 | 8900001 | 9000000 | 0.248 | 0.539 | normal |
| chr01 | 9000001 | 9100000 | 0.082 | 0.976 | normal |
| chr01 | 9100001 | 9200000 | 0.159 | 1.406 | normal |
| chr01 | 9200001 | 9300000 | 0.097 | 1.069 | normal |

|       |          |          |       |       |        |
|-------|----------|----------|-------|-------|--------|
| chr01 | 9300001  | 9400000  | 0.061 | 1.063 | normal |
| chr01 | 9400001  | 9500000  | 0.073 | 1.348 | normal |
| chr01 | 9500001  | 9600000  | 0.099 | 1.034 | normal |
| chr01 | 9600001  | 9700000  | 0.053 | 1.158 | normal |
| chr01 | 9700001  | 9800000  | 0.027 | 1.214 | normal |
| chr01 | 9800001  | 9900000  | 0.050 | 1.119 | normal |
| chr01 | 9900001  | 10000000 | 0.088 | 0.844 | normal |
| chr01 | 10000001 | 10100000 | 0.090 | 0.823 | normal |
| chr01 | 10100001 | 10200000 | 0.068 | 0.826 | normal |
| chr01 | 10200001 | 10300000 | 0.113 | 1.127 | normal |
| chr01 | 10300001 | 10400000 | 0.202 | 1.537 | sig    |
| chr01 | 10400001 | 10500000 | 0.084 | 1.246 | normal |
| chr01 | 10500001 | 10600000 | 0.125 | 0.953 | normal |
| chr01 | 10600001 | 10700000 | 0.135 | 0.975 | normal |
| chr01 | 10700001 | 10800000 | 0.132 | 0.971 | normal |
| chr01 | 10800001 | 10900000 | 0.115 | 0.946 | normal |
| chr01 | 10900001 | 11000000 | 0.107 | 0.819 | normal |
| chr01 | 11000001 | 11100000 | 0.129 | 0.670 | normal |
| chr01 | 11100001 | 11200000 | 0.128 | 0.705 | normal |
| chr01 | 11200001 | 11300000 | 0.117 | 0.674 | normal |
| chr01 | 11300001 | 11400000 | 0.127 | 0.709 | normal |
| chr01 | 11400001 | 11500000 | 0.137 | 0.646 | normal |
| chr01 | 11500001 | 11600000 | 0.110 | 0.741 | normal |
| chr01 | 11600001 | 11700000 | 0.135 | 0.672 | normal |
| chr01 | 11700001 | 11800000 | 0.145 | 0.707 | normal |
| chr01 | 11800001 | 11900000 | 0.129 | 0.660 | normal |
| chr01 | 11900001 | 12000000 | 0.103 | 0.745 | normal |
| chr01 | 12000001 | 12100000 | 0.125 | 0.663 | normal |
| chr01 | 12100001 | 12200000 | 0.122 | 0.718 | normal |
| chr01 | 12200001 | 12300000 | 0.099 | 0.806 | normal |
| chr01 | 12300001 | 12400000 | 0.116 | 0.691 | normal |
| chr01 | 12400001 | 12500000 | 0.140 | 0.650 | normal |
| chr01 | 12500001 | 12600000 | 0.132 | 0.677 | normal |
| chr01 | 12600001 | 12700000 | 0.145 | 0.627 | normal |
| chr01 | 12700001 | 12800000 | 0.093 | 1.182 | normal |
| chr01 | 12800001 | 12900000 | 0.068 | 1.004 | normal |
| chr01 | 12900001 | 13000000 | 0.048 | 0.909 | normal |
| chr01 | 13000001 | 13100000 | 0.079 | 1.120 | normal |
| chr01 | 13100001 | 13200000 | 0.038 | 0.978 | normal |
| chr01 | 13200001 | 13300000 | 0.128 | 1.151 | normal |
| chr01 | 13300001 | 13400000 | 0.099 | 0.940 | normal |
| chr01 | 13400001 | 13500000 | 0.137 | 0.762 | normal |
| chr01 | 13500001 | 13600000 | 0.097 | 0.941 | normal |
| chr01 | 13600001 | 13700000 | 0.105 | 1.069 | normal |

|       |          |          |       |       |        |
|-------|----------|----------|-------|-------|--------|
| chr01 | 13700001 | 13800000 | 0.073 | 1.248 | normal |
| chr01 | 13800001 | 13900000 | 0.057 | 1.473 | normal |
| chr01 | 13900001 | 14000000 | 0.084 | 1.379 | normal |
| chr01 | 14000001 | 14100000 | 0.090 | 1.081 | normal |
| chr01 | 14100001 | 14200000 | 0.075 | 1.538 | normal |
| chr01 | 14200001 | 14300000 | 0.049 | 2.059 | normal |
| chr01 | 14300001 | 14400000 | 0.086 | 0.970 | normal |
| chr01 | 14400001 | 14500000 | 0.073 | 1.936 | normal |
| chr01 | 14500001 | 14600000 | 0.074 | 2.668 | normal |
| chr01 | 14600001 | 14700000 | 0.156 | 1.049 | normal |
| chr01 | 14700001 | 14800000 | 0.128 | 0.818 | normal |
| chr01 | 14800001 | 14900000 | 0.060 | 1.012 | normal |
| chr01 | 14900001 | 15000000 | 0.104 | 1.094 | normal |
| chr01 | 15000001 | 15100000 | 0.126 | 1.153 | normal |
| chr01 | 15100001 | 15200000 | 0.073 | 1.225 | normal |
| chr01 | 15200001 | 15300000 | 0.054 | 0.983 | normal |
| chr01 | 15300001 | 15400000 | 0.065 | 1.184 | normal |
| chr01 | 15400001 | 15500000 | 0.068 | 1.889 | normal |
| chr01 | 15500001 | 15600000 | 0.076 | 2.022 | normal |
| chr01 | 15600001 | 15700000 | 0.062 | 1.730 | normal |
| chr01 | 15700001 | 15800000 | 0.069 | 1.598 | normal |
| chr01 | 15800001 | 15900000 | 0.053 | 1.590 | normal |
| chr01 | 15900001 | 16000000 | 0.055 | 1.319 | normal |
| chr01 | 16000001 | 16100000 | 0.067 | 1.569 | normal |
| chr01 | 16100001 | 16200000 | 0.058 | 1.017 | normal |
| chr01 | 16200001 | 16300000 | 0.047 | 1.010 | normal |
| chr01 | 16300001 | 16400000 | 0.151 | 0.659 | normal |
| chr01 | 16400001 | 16500000 | 0.057 | 1.132 | normal |
| chr01 | 16500001 | 16600000 | 0.073 | 1.238 | normal |
| chr01 | 16600001 | 16700000 | 0.077 | 0.803 | normal |
| chr01 | 16700001 | 16800000 | 0.050 | 0.882 | normal |
| chr01 | 16800001 | 16900000 | 0.026 | 1.244 | normal |
| chr01 | 16900001 | 17000000 | 0.072 | 1.295 | normal |
| chr01 | 17000001 | 17100000 | 0.067 | 1.090 | normal |
| chr01 | 17100001 | 17200000 | 0.135 | 1.354 | normal |
| chr01 | 17200001 | 17300000 | 0.119 | 0.875 | normal |
| chr01 | 17300001 | 17400000 | 0.085 | 1.338 | normal |
| chr01 | 17400001 | 17500000 | 0.099 | 1.200 | normal |
| chr01 | 17500001 | 17600000 | 0.108 | 0.977 | normal |
| chr01 | 17600001 | 17700000 | 0.079 | 1.122 | normal |
| chr01 | 17700001 | 17800000 | 0.119 | 0.895 | normal |
| chr01 | 17800001 | 17900000 | 0.116 | 0.950 | normal |
| chr01 | 17900001 | 18000000 | 0.108 | 1.109 | normal |
| chr01 | 18000001 | 18100000 | 0.082 | 1.032 | normal |

|       |          |          |       |       |        |
|-------|----------|----------|-------|-------|--------|
| chr01 | 18100001 | 18200000 | 0.051 | 1.127 | normal |
| chr01 | 18200001 | 18300000 | 0.113 | 1.138 | normal |
| chr01 | 18300001 | 18400000 | 0.104 | 1.190 | normal |
| chr01 | 18400001 | 18500000 | 0.165 | 0.798 | normal |
| chr01 | 18500001 | 18600000 | 0.126 | 1.392 | normal |
| chr01 | 18600001 | 18700000 | 0.128 | 2.502 | normal |
| chr01 | 18700001 | 18800000 | 0.029 | 0.827 | normal |
| chr01 | 18800001 | 18900000 | 0.025 | 0.931 | normal |
| chr01 | 18900001 | 19000000 | 0.039 | 0.985 | normal |
| chr01 | 19000001 | 19100000 | 0.042 | 1.254 | normal |
| chr01 | 19100001 | 19200000 | 0.064 | 1.127 | normal |
| chr01 | 19200001 | 19300000 | 0.085 | 1.040 | normal |
| chr01 | 19300001 | 19400000 | 0.060 | 0.838 | normal |
| chr01 | 19400001 | 19500000 | 0.065 | 0.851 | normal |
| chr01 | 19500001 | 19600000 | 0.091 | 1.240 | normal |
| chr01 | 19600001 | 19700000 | 0.099 | 0.975 | normal |
| chr01 | 19700001 | 19800000 | 0.104 | 1.100 | normal |
| chr01 | 19800001 | 19900000 | 0.144 | 0.896 | normal |
| chr01 | 19900001 | 20000000 | 0.081 | 1.045 | normal |
| chr01 | 20000001 | 20100000 | 0.074 | 0.989 | normal |
| chr01 | 20100001 | 20200000 | 0.052 | 1.244 | normal |
| chr01 | 20200001 | 20300000 | 0.065 | 1.237 | normal |
| chr01 | 20300001 | 20400000 | 0.261 | 1.181 | normal |
| chr01 | 20400001 | 20500000 | 0.112 | 1.014 | normal |
| chr01 | 20500001 | 20600000 | 0.083 | 1.376 | normal |
| chr01 | 20600001 | 20700000 | 0.070 | 0.949 | normal |
| chr01 | 20700001 | 20800000 | 0.082 | 0.920 | normal |
| chr01 | 20800001 | 20900000 | 0.109 | 1.168 | normal |
| chr01 | 20900001 | 21000000 | 0.101 | 0.978 | normal |
| chr01 | 21000001 | 21100000 | 0.100 | 0.958 | normal |
| chr01 | 21100001 | 21200000 | 0.048 | 1.144 | normal |
| chr01 | 21200001 | 21300000 | 0.142 | 0.822 | normal |
| chr01 | 21300001 | 21400000 | 0.076 | 1.217 | normal |
| chr01 | 21400001 | 21500000 | 0.069 | 1.613 | normal |
| chr01 | 21500001 | 21600000 | 0.048 | 1.038 | normal |
| chr01 | 21600001 | 21700000 | 0.057 | 1.006 | normal |
| chr01 | 21700001 | 21800000 | 0.059 | 1.086 | normal |
| chr01 | 21800001 | 21900000 | 0.056 | 1.175 | normal |
| chr01 | 21900001 | 22000000 | 0.079 | 0.883 | normal |
| chr01 | 22000001 | 22100000 | 0.089 | 1.200 | normal |
| chr01 | 22100001 | 22200000 | 0.113 | 1.517 | normal |
| chr01 | 22200001 | 22300000 | 0.041 | 0.981 | normal |
| chr01 | 22300001 | 22400000 | 0.082 | 0.837 | normal |
| chr01 | 22400001 | 22500000 | 0.073 | 1.094 | normal |



|       |          |          |       |       |        |
|-------|----------|----------|-------|-------|--------|
| chr01 | 22500001 | 22600000 | 0.059 | 0.966 | normal |
| chr01 | 22600001 | 22700000 | 0.089 | 1.653 | normal |
| chr01 | 22700001 | 22800000 | 0.100 | 0.934 | normal |
| chr01 | 22800001 | 22900000 | 0.074 | 1.240 | normal |
| chr01 | 22900001 | 23000000 | 0.049 | 1.011 | normal |
| chr01 | 23000001 | 23100000 | 0.098 | 1.559 | normal |
| chr01 | 23100001 | 23200000 | 0.071 | 1.009 | normal |
| chr01 | 23200001 | 23300000 | 0.073 | 1.041 | normal |
| chr01 | 23300001 | 23400000 | 0.107 | 1.025 | normal |
| chr01 | 23400001 | 23500000 | 0.065 | 1.532 | normal |
| chr01 | 23500001 | 23600000 | 0.126 | 0.930 | normal |
| chr01 | 23600001 | 23700000 | 0.053 | 1.027 | normal |
| chr01 | 23700001 | 23800000 | 0.043 | 1.042 | normal |
| chr01 | 23800001 | 23900000 | 0.076 | 1.325 | normal |
| chr01 | 23900001 | 24000000 | 0.096 | 1.075 | normal |
| chr01 | 24000001 | 24100000 | 0.011 | 1.050 | normal |
| chr01 | 24100001 | 24200000 | 0.074 | 0.838 | normal |
| chr01 | 24200001 | 24300000 | 0.154 | 0.661 | normal |
| chr01 | 24300001 | 24400000 | 0.213 | 0.466 | normal |
| chr01 | 24400001 | 24500000 | 0.096 | 1.040 | normal |
| chr01 | 24500001 | 24600000 | 0.074 | 1.507 | normal |
| chr01 | 24600001 | 24700000 | 0.077 | 0.862 | normal |
| chr01 | 24700001 | 24800000 | 0.077 | 1.446 | normal |
| chr01 | 24800001 | 24900000 | 0.086 | 1.340 | normal |
| chr01 | 24900001 | 25000000 | 0.027 | 0.965 | normal |
| chr01 | 25000001 | 25100000 | 0.045 | 0.961 | normal |
| chr01 | 25100001 | 25200000 | 0.036 | 1.046 | normal |
| chr01 | 25200001 | 25300000 | 0.028 | 0.847 | normal |
| chr01 | 25300001 | 25400000 | 0.029 | 1.017 | normal |
| chr01 | 25400001 | 25500000 | 0.086 | 1.159 | normal |
| chr01 | 25500001 | 25600000 | 0.040 | 1.121 | normal |
| chr01 | 25600001 | 25700000 | 0.017 | 1.049 | normal |
| chr01 | 25700001 | 25800000 | 0.033 | 1.053 | normal |
| chr01 | 25800001 | 25900000 | 0.059 | 1.028 | normal |
| chr01 | 25900001 | 26000000 | 0.043 | 1.175 | normal |
| chr01 | 26000001 | 26100000 | 0.044 | 1.027 | normal |
| chr01 | 26100001 | 26200000 | 0.048 | 0.951 | normal |
| chr01 | 26200001 | 26300000 | 0.050 | 0.875 | normal |
| chr01 | 26300001 | 26400000 | 0.057 | 1.050 | normal |
| chr01 | 26400001 | 26500000 | 0.039 | 0.855 | normal |
| chr01 | 26500001 | 26600000 | 0.035 | 0.983 | normal |
| chr01 | 26600001 | 26700000 | 0.063 | 0.968 | normal |
| chr01 | 26700001 | 26800000 | 0.071 | 1.102 | normal |
| chr01 | 26800001 | 26900000 | 0.043 | 1.045 | normal |

|       |          |          |       |       |        |
|-------|----------|----------|-------|-------|--------|
| chr01 | 26900001 | 27000000 | 0.043 | 1.048 | normal |
| chr01 | 27000001 | 27100000 | 0.088 | 1.018 | normal |
| chr01 | 27100001 | 27200000 | 0.083 | 0.939 | normal |
| chr01 | 27200001 | 27300000 | 0.035 | 0.954 | normal |
| chr01 | 27300001 | 27400000 | 0.024 | 0.959 | normal |
| chr01 | 27400001 | 27500000 | 0.066 | 0.956 | normal |
| chr01 | 27500001 | 27600000 | 0.056 | 0.982 | normal |
| chr01 | 27600001 | 27700000 | 0.072 | 0.960 | normal |
| chr01 | 27700001 | 27800000 | 0.047 | 1.043 | normal |
| chr01 | 27800001 | 27900000 | 0.070 | 1.043 | normal |
| chr01 | 27900001 | 28000000 | 0.049 | 1.145 | normal |
| chr01 | 28000001 | 28100000 | 0.094 | 0.688 | normal |
| chr01 | 28100001 | 28200000 | 0.052 | 1.060 | normal |
| chr01 | 28200001 | 28300000 | 0.061 | 0.978 | normal |
| chr01 | 28300001 | 28400000 | 0.069 | 0.922 | normal |
| chr01 | 28400001 | 28500000 | 0.041 | 1.030 | normal |
| chr01 | 28500001 | 28600000 | 0.053 | 0.951 | normal |
| chr01 | 28600001 | 28700000 | 0.068 | 0.978 | normal |
| chr01 | 28700001 | 28800000 | 0.047 | 1.294 | normal |
| chr01 | 28800001 | 28900000 | 0.056 | 0.850 | normal |
| chr01 | 28900001 | 29000000 | 0.022 | 1.055 | normal |
| chr01 | 29000001 | 29100000 | 0.027 | 0.984 | normal |
| chr01 | 29100001 | 29200000 | 0.025 | 0.998 | normal |
| chr01 | 29200001 | 29300000 | 0.016 | 1.019 | normal |
| chr01 | 29300001 | 29400000 | 0.073 | 0.979 | normal |
| chr01 | 29400001 | 29500000 | 0.107 | 0.661 | normal |
| chr01 | 29500001 | 29600000 | 0.073 | 0.841 | normal |
| chr01 | 29600001 | 29700000 | 0.045 | 0.902 | normal |
| chr01 | 29700001 | 29800000 | 0.044 | 0.965 | normal |
| chr01 | 29800001 | 29900000 | 0.047 | 0.897 | normal |
| chr01 | 29900001 | 30000000 | 0.053 | 0.980 | normal |
| chr01 | 30000001 | 30100000 | 0.025 | 0.947 | normal |
| chr01 | 30100001 | 30200000 | 0.042 | 0.815 | normal |
| chr01 | 30200001 | 30300000 | 0.039 | 0.964 | normal |
| chr01 | 30300001 | 30400000 | 0.026 | 0.923 | normal |
| chr01 | 30400001 | 30500000 | 0.048 | 0.922 | normal |
| chr01 | 30500001 | 30600000 | 0.050 | 0.940 | normal |
| chr01 | 30600001 | 30700000 | 0.030 | 0.966 | normal |
| chr01 | 30700001 | 30800000 | 0.027 | 0.956 | normal |
| chr01 | 30800001 | 30900000 | 0.033 | 0.955 | normal |
| chr01 | 30900001 | 31000000 | 0.038 | 1.082 | normal |
| chr01 | 31000001 | 31100000 | 0.024 | 0.992 | normal |
| chr01 | 31100001 | 31200000 | 0.024 | 0.942 | normal |
| chr01 | 31200001 | 31300000 | 0.037 | 1.105 | normal |

|       |          |          |       |       |        |
|-------|----------|----------|-------|-------|--------|
| chr01 | 31300001 | 31400000 | 0.024 | 1.047 | normal |
| chr01 | 31400001 | 31500000 | 0.035 | 1.089 | normal |
| chr01 | 31500001 | 31600000 | 0.046 | 1.142 | normal |
| chr01 | 31600001 | 31700000 | 0.036 | 1.136 | normal |
| chr01 | 31700001 | 31800000 | 0.062 | 0.741 | normal |
| chr01 | 31800001 | 31900000 | 0.049 | 1.019 | normal |
| chr01 | 31900001 | 32000000 | 0.051 | 0.904 | normal |
| chr01 | 32000001 | 32100000 | 0.040 | 0.916 | normal |
| chr01 | 32100001 | 32200000 | 0.050 | 0.928 | normal |
| chr01 | 32200001 | 32300000 | 0.054 | 0.924 | normal |
| chr01 | 32300001 | 32400000 | 0.069 | 0.682 | normal |
| chr01 | 32400001 | 32500000 | 0.081 | 0.784 | normal |
| chr01 | 32500001 | 32600000 | 0.155 | 0.644 | normal |
| chr01 | 32600001 | 32700000 | 0.057 | 1.086 | normal |
| chr01 | 32700001 | 32800000 | 0.093 | 1.219 | normal |
| chr01 | 32800001 | 32900000 | 0.102 | 1.099 | normal |
| chr01 | 32900001 | 33000000 | 0.099 | 0.942 | normal |
| chr01 | 33000001 | 33100000 | 0.117 | 0.805 | normal |
| chr01 | 33100001 | 33200000 | 0.078 | 1.082 | normal |
| chr01 | 33200001 | 33300000 | 0.065 | 1.055 | normal |
| chr01 | 33300001 | 33400000 | 0.084 | 1.139 | normal |
| chr01 | 33400001 | 33500000 | 0.069 | 1.314 | normal |
| chr01 | 33500001 | 33600000 | 0.067 | 0.871 | normal |
| chr01 | 33600001 | 33700000 | 0.080 | 1.154 | normal |
| chr01 | 33700001 | 33800000 | 0.097 | 0.962 | normal |
| chr01 | 33800001 | 33900000 | 0.094 | 0.768 | normal |
| chr01 | 33900001 | 34000000 | 0.078 | 0.820 | normal |
| chr01 | 34000001 | 34100000 | 0.090 | 1.031 | normal |
| chr01 | 34100001 | 34200000 | 0.063 | 1.063 | normal |
| chr01 | 34200001 | 34300000 | 0.067 | 0.952 | normal |
| chr01 | 34300001 | 34400000 | 0.055 | 1.036 | normal |
| chr01 | 34400001 | 34500000 | 0.087 | 1.038 | normal |
| chr01 | 34500001 | 34600000 | 0.094 | 1.096 | normal |
| chr01 | 34600001 | 34700000 | 0.117 | 2.586 | normal |
| chr01 | 34700001 | 34800000 | 0.102 | 1.042 | normal |
| chr01 | 34800001 | 34900000 | 0.067 | 1.393 | normal |
| chr01 | 34900001 | 35000000 | 0.064 | 1.583 | normal |
| chr01 | 35000001 | 35100000 | 0.097 | 1.284 | normal |
| chr01 | 35100001 | 35200000 | 0.112 | 0.854 | normal |
| chr01 | 35200001 | 35300000 | 0.037 | 1.307 | normal |
| chr01 | 35300001 | 35400000 | 0.043 | 0.938 | normal |
| chr01 | 35400001 | 35500000 | 0.067 | 0.925 | normal |
| chr01 | 35500001 | 35600000 | 0.135 | 0.766 | normal |
| chr01 | 35600001 | 35700000 | 0.054 | 1.119 | normal |

|       |          |          |       |       |        |
|-------|----------|----------|-------|-------|--------|
| chr01 | 35700001 | 35800000 | 0.136 | 0.896 | normal |
| chr08 | 1        | 100000   | 0.091 | 0.783 | normal |
| chr08 | 100001   | 200000   | 0.082 | 0.711 | normal |
| chr08 | 200001   | 300000   | 0.110 | 0.524 | normal |
| chr08 | 300001   | 400000   | 0.090 | 0.805 | normal |
| chr08 | 400001   | 500000   | 0.086 | 0.830 | normal |
| chr08 | 500001   | 600000   | 0.071 | 0.984 | normal |
| chr08 | 600001   | 700000   | 0.089 | 0.992 | normal |
| chr08 | 700001   | 800000   | 0.096 | 1.051 | normal |
| chr08 | 800001   | 900000   | 0.101 | 1.123 | normal |
| chr08 | 900001   | 1000000  | 0.074 | 0.879 | normal |
| chr08 | 1000001  | 1100000  | 0.061 | 0.956 | normal |
| chr08 | 1100001  | 1200000  | 0.092 | 0.751 | normal |
| chr08 | 1200001  | 1300000  | 0.073 | 0.729 | normal |
| chr08 | 1300001  | 1400000  | 0.033 | 0.992 | normal |
| chr08 | 1400001  | 1500000  | 0.080 | 0.920 | normal |
| chr08 | 1500001  | 1600000  | 0.041 | 0.911 | normal |
| chr08 | 1600001  | 1700000  | 0.089 | 0.801 | normal |
| chr08 | 1700001  | 1800000  | 0.053 | 1.049 | normal |
| chr08 | 1800001  | 1900000  | 0.051 | 1.019 | normal |
| chr08 | 1900001  | 2000000  | 0.053 | 0.988 | normal |
| chr08 | 2000001  | 2100000  | 0.037 | 0.895 | normal |
| chr08 | 2100001  | 2200000  | 0.020 | 0.914 | normal |
| chr08 | 2200001  | 2300000  | 0.043 | 0.983 | normal |
| chr08 | 2300001  | 2400000  | 0.025 | 0.857 | normal |
| chr08 | 2400001  | 2500000  | 0.055 | 0.920 | normal |
| chr08 | 2500001  | 2600000  | 0.077 | 0.757 | normal |
| chr08 | 2600001  | 2700000  | 0.061 | 0.951 | normal |
| chr08 | 2700001  | 2800000  | 0.086 | 0.926 | normal |
| chr08 | 2800001  | 2900000  | 0.105 | 0.892 | normal |
| chr08 | 2900001  | 3000000  | 0.130 | 0.445 | normal |
| chr08 | 3000001  | 3100000  | 0.086 | 0.884 | normal |
| chr08 | 3100001  | 3200000  | 0.118 | 0.683 | normal |
| chr08 | 3200001  | 3300000  | 0.068 | 0.880 | normal |
| chr08 | 3300001  | 3400000  | 0.104 | 0.843 | normal |
| chr08 | 3400001  | 3500000  | 0.066 | 0.948 | normal |
| chr08 | 3500001  | 3600000  | 0.070 | 0.638 | normal |
| chr08 | 3600001  | 3700000  | 0.088 | 0.649 | normal |
| chr08 | 3700001  | 3800000  | 0.117 | 1.149 | normal |
| chr08 | 3800001  | 3900000  | 0.062 | 0.793 | normal |
| chr08 | 3900001  | 4000000  | 0.104 | 0.866 | normal |
| chr08 | 4000001  | 4100000  | 0.104 | 0.901 | normal |
| chr08 | 4100001  | 4200000  | 0.106 | 1.330 | normal |
| chr08 | 4200001  | 4300000  | 0.078 | 0.957 | normal |

|       |         |         |       |       |        |
|-------|---------|---------|-------|-------|--------|
| chr08 | 4300001 | 4400000 | 0.159 | 0.855 | normal |
| chr08 | 4400001 | 4500000 | 0.086 | 1.032 | normal |
| chr08 | 4500001 | 4600000 | 0.043 | 0.972 | normal |
| chr08 | 4600001 | 4700000 | 0.080 | 1.015 | normal |
| chr08 | 4700001 | 4800000 | 0.078 | 0.925 | normal |
| chr08 | 4800001 | 4900000 | 0.080 | 0.934 | normal |
| chr08 | 4900001 | 5000000 | 0.064 | 0.905 | normal |
| chr08 | 5000001 | 5100000 | 0.056 | 0.925 | normal |
| chr08 | 5100001 | 5200000 | 0.087 | 1.104 | normal |
| chr08 | 5200001 | 5300000 | 0.099 | 1.042 | normal |
| chr08 | 5300001 | 5400000 | 0.112 | 0.812 | normal |
| chr08 | 5400001 | 5500000 | 0.123 | 0.760 | normal |
| chr08 | 5500001 | 5600000 | 0.099 | 0.736 | normal |
| chr08 | 5600001 | 5700000 | 0.075 | 0.958 | normal |
| chr08 | 5700001 | 5800000 | 0.111 | 0.918 | normal |
| chr08 | 5800001 | 5900000 | 0.088 | 0.710 | normal |
| chr08 | 5900001 | 6000000 | 0.041 | 1.145 | normal |
| chr08 | 6000001 | 6100000 | 0.075 | 1.005 | normal |
| chr08 | 6100001 | 6200000 | 0.062 | 0.936 | normal |
| chr08 | 6200001 | 6300000 | 0.164 | 1.355 | normal |
| chr08 | 6300001 | 6400000 | 0.104 | 1.113 | normal |
| chr08 | 6400001 | 6500000 | 0.062 | 0.915 | normal |
| chr08 | 6500001 | 6600000 | 0.075 | 0.852 | normal |
| chr08 | 6600001 | 6700000 | 0.086 | 1.006 | normal |
| chr08 | 6700001 | 6800000 | 0.049 | 0.790 | normal |
| chr08 | 6800001 | 6900000 | 0.080 | 0.896 | normal |
| chr08 | 6900001 | 7000000 | 0.074 | 0.785 | normal |
| chr08 | 7000001 | 7100000 | 0.134 | 1.134 | normal |
| chr08 | 7100001 | 7200000 | 0.104 | 0.784 | normal |
| chr08 | 7200001 | 7300000 | 0.073 | 0.831 | normal |
| chr08 | 7300001 | 7400000 | 0.116 | 1.057 | normal |
| chr08 | 7400001 | 7500000 | 0.088 | 0.804 | normal |
| chr08 | 7500001 | 7600000 | 0.064 | 1.018 | normal |
| chr08 | 7600001 | 7700000 | 0.102 | 1.030 | normal |
| chr08 | 7700001 | 7800000 | 0.070 | 0.997 | normal |
| chr08 | 7800001 | 7900000 | 0.049 | 1.161 | normal |
| chr08 | 7900001 | 8000000 | 0.052 | 1.016 | normal |
| chr08 | 8000001 | 8100000 | 0.097 | 0.748 | normal |
| chr08 | 8100001 | 8200000 | 0.093 | 1.079 | normal |
| chr08 | 8200001 | 8300000 | 0.076 | 1.227 | normal |
| chr08 | 8300001 | 8400000 | 0.074 | 1.214 | normal |
| chr08 | 8400001 | 8500000 | 0.045 | 0.956 | normal |
| chr08 | 8500001 | 8600000 | 0.052 | 0.948 | normal |
| chr08 | 8600001 | 8700000 | 0.072 | 0.828 | normal |

|       |          |          |       |       |        |
|-------|----------|----------|-------|-------|--------|
| chr08 | 8700001  | 8800000  | 0.080 | 0.771 | normal |
| chr08 | 8800001  | 8900000  | 0.044 | 0.972 | normal |
| chr08 | 8900001  | 9000000  | 0.054 | 0.970 | normal |
| chr08 | 9000001  | 9100000  | 0.066 | 0.867 | normal |
| chr08 | 9100001  | 9200000  | 0.068 | 0.998 | normal |
| chr08 | 9200001  | 9300000  | 0.040 | 1.030 | normal |
| chr08 | 9300001  | 9400000  | 0.123 | 0.960 | normal |
| chr08 | 9400001  | 9500000  | 0.062 | 0.933 | normal |
| chr08 | 9500001  | 9600000  | 0.049 | 1.168 | normal |
| chr08 | 9600001  | 9700000  | 0.093 | 1.381 | normal |
| chr08 | 9700001  | 9800000  | 0.086 | 0.829 | normal |
| chr08 | 9800001  | 9900000  | 0.086 | 0.977 | normal |
| chr08 | 9900001  | 10000000 | 0.071 | 0.928 | normal |
| chr08 | 10000001 | 10100000 | 0.064 | 0.971 | normal |
| chr08 | 10100001 | 10200000 | 0.046 | 1.076 | normal |
| chr08 | 10200001 | 10300000 | 0.050 | 1.003 | normal |
| chr08 | 10300001 | 10400000 | 0.050 | 0.941 | normal |
| chr08 | 10400001 | 10500000 | 0.047 | 0.938 | normal |
| chr08 | 10500001 | 10600000 | 0.076 | 1.022 | normal |
| chr08 | 10600001 | 10700000 | 0.120 | 0.729 | normal |
| chr08 | 10700001 | 10800000 | 0.060 | 1.019 | normal |
| chr08 | 10800001 | 10900000 | 0.095 | 0.741 | normal |
| chr08 | 10900001 | 11000000 | 0.050 | 0.810 | normal |
| chr08 | 11000001 | 11100000 | 0.054 | 0.942 | normal |
| chr08 | 11100001 | 11200000 | 0.094 | 1.156 | normal |
| chr08 | 11200001 | 11300000 | 0.073 | 0.904 | normal |
| chr08 | 11300001 | 11400000 | 0.059 | 0.791 | normal |
| chr08 | 11400001 | 11500000 | 0.081 | 0.997 | normal |
| chr08 | 11500001 | 11600000 | 0.079 | 0.962 | normal |
| chr08 | 11600001 | 11700000 | 0.043 | 1.123 | normal |
| chr08 | 11700001 | 11800000 | 0.054 | 1.187 | normal |
| chr08 | 11800001 | 11900000 | 0.071 | 0.966 | normal |
| chr08 | 11900001 | 12000000 | 0.113 | 1.537 | normal |
| chr08 | 12000001 | 12100000 | 0.046 | 1.468 | normal |
| chr08 | 12100001 | 12200000 | 0.043 | 1.317 | normal |
| chr08 | 12200001 | 12300000 | 0.069 | 1.189 | normal |
| chr08 | 12300001 | 12400000 | 0.029 | 1.179 | normal |
| chr08 | 12400001 | 12500000 | 0.059 | 1.014 | normal |
| chr08 | 12500001 | 12600000 | 0.071 | 1.906 | normal |
| chr08 | 12600001 | 12700000 | 0.052 | 1.393 | normal |
| chr08 | 12700001 | 12800000 | 0.042 | 1.329 | normal |
| chr08 | 12800001 | 12900000 | 0.046 | 1.099 | normal |
| chr08 | 12900001 | 13000000 | 0.092 | 1.069 | normal |
| chr08 | 13000001 | 13100000 | 0.056 | 0.807 | normal |

|       |          |          |       |       |        |
|-------|----------|----------|-------|-------|--------|
| chr08 | 13100001 | 13200000 | 0.050 | 0.937 | normal |
| chr08 | 13200001 | 13300000 | 0.030 | 0.961 | normal |
| chr08 | 13300001 | 13400000 | 0.071 | 0.804 | normal |
| chr08 | 13400001 | 13500000 | 0.076 | 0.832 | normal |
| chr08 | 13500001 | 13600000 | 0.036 | 1.022 | normal |
| chr08 | 13600001 | 13700000 | 0.051 | 0.949 | normal |
| chr08 | 13700001 | 13800000 | 0.046 | 1.012 | normal |
| chr08 | 13800001 | 13900000 | 0.054 | 1.011 | normal |
| chr08 | 13900001 | 14000000 | 0.024 | 0.958 | normal |
| chr08 | 14000001 | 14100000 | 0.058 | 0.932 | normal |
| chr08 | 14100001 | 14200000 | 0.042 | 0.996 | normal |
| chr08 | 14200001 | 14300000 | 0.114 | 0.858 | normal |
| chr08 | 14300001 | 14400000 | 0.066 | 1.048 | normal |
| chr08 | 14400001 | 14500000 | 0.085 | 1.134 | normal |
| chr08 | 14500001 | 14600000 | 0.115 | 0.970 | normal |
| chr08 | 14600001 | 14700000 | 0.060 | 0.991 | normal |
| chr08 | 14700001 | 14800000 | 0.046 | 0.890 | normal |
| chr08 | 14800001 | 14900000 | 0.080 | 0.781 | normal |
| chr08 | 14900001 | 15000000 | 0.048 | 0.744 | normal |
| chr08 | 15000001 | 15100000 | 0.010 | 1.057 | normal |
| chr08 | 15100001 | 15200000 | 0.040 | 0.945 | normal |
| chr08 | 15200001 | 15300000 | 0.028 | 0.883 | normal |
| chr08 | 15300001 | 15400000 | 0.069 | 0.765 | normal |
| chr08 | 15400001 | 15500000 | 0.066 | 0.956 | normal |
| chr08 | 15500001 | 15600000 | 0.063 | 0.841 | normal |
| chr08 | 15600001 | 15700000 | 0.071 | 0.776 | normal |
| chr08 | 15700001 | 15800000 | 0.064 | 0.819 | normal |
| chr08 | 15800001 | 15900000 | 0.059 | 1.156 | normal |
| chr08 | 15900001 | 16000000 | 0.050 | 0.865 | normal |
| chr08 | 16000001 | 16100000 | 0.053 | 0.940 | normal |
| chr08 | 16100001 | 16200000 | 0.056 | 0.768 | normal |
| chr08 | 16200001 | 16300000 | 0.026 | 0.804 | normal |
| chr08 | 16300001 | 16400000 | 0.094 | 0.610 | normal |
| chr08 | 16400001 | 16500000 | 0.058 | 0.791 | normal |
| chr08 | 16500001 | 16600000 | 0.067 | 0.623 | normal |
| chr08 | 16600001 | 16700000 | 0.057 | 0.846 | normal |
| chr08 | 16700001 | 16800000 | 0.061 | 0.717 | normal |
| chr08 | 16800001 | 16900000 | 0.050 | 0.857 | normal |
| chr08 | 16900001 | 17000000 | 0.024 | 1.045 | normal |
| chr08 | 17000001 | 17100000 | 0.021 | 0.894 | normal |
| chr08 | 17100001 | 17200000 | 0.014 | 1.056 | normal |
| chr08 | 17200001 | 17300000 | 0.055 | 0.874 | normal |
| chr08 | 17300001 | 17400000 | 0.046 | 0.777 | normal |
| chr08 | 17400001 | 17500000 | 0.136 | 0.390 | normal |

|       |          |          |       |       |        |
|-------|----------|----------|-------|-------|--------|
| chr08 | 17500001 | 17600000 | 0.068 | 0.854 | normal |
| chr08 | 17600001 | 17700000 | 0.049 | 0.849 | normal |
| chr08 | 17700001 | 17800000 | 0.027 | 0.932 | normal |
| chr08 | 17800001 | 17900000 | 0.060 | 0.981 | normal |
| chr08 | 17900001 | 18000000 | 0.067 | 1.336 | normal |
| chr08 | 18000001 | 18100000 | 0.044 | 0.870 | normal |
| chr08 | 18100001 | 18200000 | 0.077 | 0.809 | normal |
| chr08 | 18200001 | 18300000 | 0.064 | 0.793 | normal |
| chr08 | 18300001 | 18400000 | 0.044 | 0.997 | normal |
| chr08 | 18400001 | 18500000 | 0.070 | 1.312 | normal |
| chr08 | 18500001 | 18600000 | 0.043 | 1.004 | normal |
| chr08 | 18600001 | 18700000 | 0.058 | 1.088 | normal |
| chr08 | 18700001 | 18800000 | 0.101 | 1.066 | normal |
| chr08 | 18800001 | 18900000 | 0.042 | 1.386 | normal |
| chr08 | 18900001 | 19000000 | 0.037 | 1.486 | normal |
| chr08 | 19000001 | 19100000 | 0.017 | 0.997 | normal |
| chr08 | 19100001 | 19200000 | 0.094 | 0.809 | normal |
| chr08 | 19200001 | 19300000 | 0.079 | 0.887 | normal |
| chr08 | 19300001 | 19400000 | 0.098 | 0.778 | normal |
| chr08 | 19400001 | 19500000 | 0.133 | 0.785 | normal |
| chr08 | 19500001 | 19600000 | 0.066 | 0.838 | normal |
| chr08 | 19600001 | 19700000 | 0.115 | 0.500 | normal |
| chr08 | 19700001 | 19800000 | 0.107 | 0.392 | normal |
| chr08 | 19800001 | 19900000 | 0.065 | 0.626 | normal |
| chr08 | 19900001 | 20000000 | 0.057 | 0.841 | normal |
| chr08 | 20000001 | 20100000 | 0.119 | 0.716 | normal |
| chr08 | 20100001 | 20200000 | 0.145 | 0.409 | normal |
| chr08 | 20200001 | 20300000 | 0.128 | 0.717 | normal |
| chr08 | 20300001 | 20400000 | 0.066 | 1.146 | normal |
| chr08 | 20400001 | 20500000 | 0.093 | 1.030 | normal |
| chr08 | 20500001 | 20600000 | 0.124 | 0.906 | normal |
| chr08 | 20600001 | 20700000 | 0.069 | 0.961 | normal |
| chr08 | 20700001 | 20800000 | 0.030 | 1.058 | normal |
| chr08 | 20800001 | 20900000 | 0.075 | 0.945 | normal |
| chr08 | 20900001 | 21000000 | 0.073 | 1.156 | normal |
| chr08 | 21000001 | 21100000 | 0.069 | 1.355 | normal |
| chr08 | 21100001 | 21200000 | 0.035 | 1.037 | normal |
| chr08 | 21200001 | 21300000 | 0.066 | 1.016 | normal |
| chr08 | 21300001 | 21400000 | 0.061 | 1.005 | normal |
| chr08 | 21400001 | 21500000 | 0.045 | 1.020 | normal |
| chr08 | 21500001 | 21600000 | 0.059 | 1.008 | normal |
| chr08 | 21600001 | 21700000 | 0.073 | 0.934 | normal |
| chr08 | 21700001 | 21800000 | 0.063 | 0.942 | normal |
| chr08 | 21800001 | 21900000 | 0.055 | 0.883 | normal |



|       |          |          |        |       |        |
|-------|----------|----------|--------|-------|--------|
| chr08 | 21900001 | 22000000 | 0.059  | 0.807 | normal |
| chr08 | 22000001 | 22100000 | 0.089  | 0.774 | normal |
| chr08 | 22100001 | 22200000 | 0.098  | 0.728 | normal |
| chr08 | 22200001 | 22300000 | 0.136  | 0.939 | normal |
| chr08 | 22300001 | 22400000 | 0.068  | 1.071 | normal |
| chr08 | 22400001 | 22500000 | 0.034  | 1.063 | normal |
| chr08 | 22500001 | 22600000 | -0.001 | 0.952 | normal |
| chr08 | 22600001 | 22700000 | 0.016  | 0.950 | normal |
| chr08 | 22700001 | 22800000 | 0.040  | 1.035 | normal |
| chr08 | 22800001 | 22900000 | 0.018  | 1.155 | normal |
| chr08 | 22900001 | 23000000 | 0.008  | 1.275 | normal |
| chr08 | 23000001 | 23100000 | 0.104  | 0.924 | normal |
| chr08 | 23100001 | 23200000 | 0.132  | 0.976 | normal |
| chr08 | 23200001 | 23300000 | 0.083  | 1.074 | normal |
| chr08 | 23300001 | 23400000 | 0.078  | 0.945 | normal |
| chr08 | 23400001 | 23500000 | 0.065  | 0.886 | normal |
| chr08 | 23500001 | 23600000 | 0.038  | 1.103 | normal |
| chr08 | 23600001 | 23700000 | 0.064  | 0.984 | normal |
| chr08 | 23700001 | 23800000 | 0.095  | 1.508 | normal |
| chr08 | 23800001 | 23900000 | 0.059  | 1.188 | normal |
| chr08 | 23900001 | 24000000 | 0.039  | 1.515 | normal |
| chr08 | 24000001 | 24100000 | 0.024  | 0.944 | normal |
| chr08 | 24100001 | 24200000 | 0.044  | 1.238 | normal |
| chr08 | 24200001 | 24300000 | 0.056  | 0.941 | normal |
| chr08 | 24300001 | 24400000 | 0.050  | 0.925 | normal |
| chr08 | 24400001 | 24500000 | 0.077  | 1.249 | normal |
| chr08 | 24500001 | 24600000 | 0.138  | 1.926 | normal |
| chr08 | 24600001 | 24700000 | 0.063  | 1.186 | normal |
| chr08 | 24700001 | 24800000 | 0.042  | 0.932 | normal |
| chr08 | 24800001 | 24900000 | 0.053  | 1.092 | normal |
| chr08 | 24900001 | 25000000 | 0.051  | 0.850 | normal |
| chr08 | 25000001 | 25100000 | 0.072  | 0.962 | normal |
| chr08 | 25100001 | 25200000 | 0.037  | 1.039 | normal |
| chr08 | 25200001 | 25300000 | 0.095  | 0.779 | normal |
| chr08 | 25300001 | 25400000 | 0.039  | 1.350 | normal |
| chr08 | 25400001 | 25500000 | 0.082  | 1.016 | normal |
| chr08 | 25500001 | 25600000 | 0.063  | 0.999 | normal |
| chr08 | 25600001 | 25700000 | 0.051  | 0.890 | normal |
| chr08 | 25700001 | 25800000 | 0.080  | 1.048 | normal |
| chr08 | 25800001 | 25900000 | 0.067  | 1.074 | normal |
| chr08 | 25900001 | 26000000 | 0.053  | 1.058 | normal |
| chr08 | 26000001 | 26100000 | 0.061  | 0.827 | normal |
| chr08 | 26100001 | 26200000 | 0.068  | 0.574 | normal |
| chr08 | 26200001 | 26300000 | 0.076  | 0.837 | normal |

|       |          |          |       |       |        |
|-------|----------|----------|-------|-------|--------|
| chr08 | 26300001 | 26400000 | 0.062 | 0.875 | normal |
| chr08 | 26400001 | 26500000 | 0.060 | 1.081 | normal |
| chr08 | 26500001 | 26600000 | 0.073 | 0.920 | normal |
| chr08 | 26600001 | 26700000 | 0.033 | 1.003 | normal |
| chr08 | 26700001 | 26800000 | 0.061 | 1.086 | normal |
| chr08 | 26800001 | 26900000 | 0.059 | 1.133 | normal |
| chr08 | 26900001 | 27000000 | 0.060 | 1.026 | normal |
| chr08 | 27000001 | 27100000 | 0.032 | 1.328 | normal |
| chr08 | 27100001 | 27200000 | 0.051 | 1.052 | normal |
| chr08 | 27200001 | 27300000 | 0.064 | 0.945 | normal |
| chr08 | 27300001 | 27400000 | 0.097 | 0.610 | normal |
| chr08 | 27400001 | 27500000 | 0.060 | 0.988 | normal |
| chr08 | 27500001 | 27600000 | 0.119 | 0.684 | normal |
| chr08 | 27600001 | 27700000 | 0.150 | 0.790 | normal |
| chr08 | 27700001 | 27800000 | 0.096 | 1.052 | normal |
| chr08 | 27800001 | 27900000 | 0.069 | 1.116 | normal |
| chr08 | 27900001 | 28000000 | 0.015 | 0.938 | normal |
| chr08 | 28000001 | 28100000 | 0.091 | 0.846 | normal |
| chr08 | 28100001 | 28200000 | 0.062 | 0.936 | normal |
| chr08 | 28200001 | 28300000 | 0.093 | 1.044 | normal |
| chr08 | 28300001 | 28400000 | 0.087 | 1.104 | normal |
| chr08 | 28400001 | 28500000 | 0.111 | 0.833 | normal |
| chr08 | 28500001 | 28600000 | 0.083 | 0.779 | normal |
| chr08 | 28600001 | 28700000 | 0.053 | 0.777 | normal |
| chr08 | 28700001 | 28800000 | 0.053 | 0.921 | normal |
| chr08 | 28800001 | 28900000 | 0.048 | 0.993 | normal |
| chr08 | 28900001 | 29000000 | 0.035 | 1.223 | normal |
| chr08 | 29000001 | 29100000 | 0.040 | 0.955 | normal |
| chr08 | 29100001 | 29200000 | 0.067 | 0.980 | normal |
| chr08 | 29200001 | 29300000 | 0.042 | 1.062 | normal |
| chr08 | 29300001 | 29400000 | 0.084 | 1.045 | normal |
| chr08 | 29400001 | 29500000 | 0.072 | 0.998 | normal |
| chr08 | 29500001 | 29600000 | 0.058 | 1.239 | normal |
| chr08 | 29600001 | 29700000 | 0.058 | 1.067 | normal |
| chr08 | 29700001 | 29800000 | 0.023 | 1.064 | normal |
| chr08 | 29800001 | 29900000 | 0.061 | 0.796 | normal |
| chr08 | 29900001 | 30000000 | 0.068 | 0.913 | normal |
| chr08 | 30000001 | 30100000 | 0.028 | 1.133 | normal |
| chr08 | 30100001 | 30200000 | 0.073 | 1.121 | normal |
| chr08 | 30200001 | 30300000 | 0.028 | 1.000 | normal |
| chr08 | 30300001 | 30400000 | 0.029 | 0.965 | normal |
| chr08 | 30400001 | 30500000 | 0.029 | 0.996 | normal |
| chr08 | 30500001 | 30600000 | 0.031 | 1.037 | normal |
| chr08 | 30600001 | 30700000 | 0.048 | 1.167 | normal |

|       |          |          |       |       |        |
|-------|----------|----------|-------|-------|--------|
| chr08 | 30700001 | 30800000 | 0.025 | 1.018 | normal |
| chr08 | 30800001 | 30900000 | 0.024 | 0.941 | normal |
| chr08 | 30900001 | 31000000 | 0.027 | 0.935 | normal |
| chr08 | 31000001 | 31100000 | 0.035 | 0.893 | normal |
| chr08 | 31100001 | 31200000 | 0.024 | 1.091 | normal |
| chr08 | 31200001 | 31300000 | 0.033 | 0.956 | normal |
| chr08 | 31300001 | 31400000 | 0.022 | 0.889 | normal |
| chr08 | 31400001 | 31500000 | 0.022 | 0.923 | normal |
| chr08 | 31500001 | 31600000 | 0.011 | 1.134 | normal |
| chr03 | 1        | 100000   | 0.117 | 1.271 | normal |
| chr03 | 100001   | 200000   | 0.112 | 1.459 | normal |
| chr03 | 200001   | 300000   | 0.117 | 1.647 | normal |
| chr03 | 300001   | 400000   | 0.075 | 1.370 | normal |
| chr03 | 400001   | 500000   | 0.016 | 0.998 | normal |
| chr03 | 500001   | 600000   | 0.044 | 1.041 | normal |
| chr03 | 600001   | 700000   | 0.041 | 1.034 | normal |
| chr03 | 700001   | 800000   | 0.035 | 1.093 | normal |
| chr03 | 800001   | 900000   | 0.092 | 1.627 | normal |
| chr03 | 900001   | 1000000  | 0.088 | 1.041 | normal |
| chr03 | 1000001  | 1100000  | 0.050 | 0.992 | normal |
| chr03 | 1100001  | 1200000  | 0.109 | 1.108 | normal |
| chr03 | 1200001  | 1300000  | 0.092 | 0.952 | normal |
| chr03 | 1300001  | 1400000  | 0.091 | 0.837 | normal |
| chr03 | 1400001  | 1500000  | 0.072 | 0.703 | normal |
| chr03 | 1500001  | 1600000  | 0.094 | 0.966 | normal |
| chr03 | 1600001  | 1700000  | 0.075 | 0.923 | normal |
| chr03 | 1700001  | 1800000  | 0.079 | 0.991 | normal |
| chr03 | 1800001  | 1900000  | 0.067 | 0.905 | normal |
| chr03 | 1900001  | 2000000  | 0.085 | 0.971 | normal |
| chr03 | 2000001  | 2100000  | 0.102 | 1.151 | normal |
| chr03 | 2100001  | 2200000  | 0.096 | 1.116 | normal |
| chr03 | 2200001  | 2300000  | 0.110 | 0.952 | normal |
| chr03 | 2300001  | 2400000  | 0.084 | 0.904 | normal |
| chr03 | 2400001  | 2500000  | 0.069 | 0.999 | normal |
| chr03 | 2500001  | 2600000  | 0.071 | 0.911 | normal |
| chr03 | 2600001  | 2700000  | 0.124 | 0.878 | normal |
| chr03 | 2700001  | 2800000  | 0.137 | 0.739 | normal |
| chr03 | 2800001  | 2900000  | 0.104 | 1.353 | normal |
| chr03 | 2900001  | 3000000  | 0.103 | 1.028 | normal |
| chr03 | 3000001  | 3100000  | 0.138 | 1.063 | normal |
| chr03 | 3100001  | 3200000  | 0.120 | 0.985 | normal |
| chr03 | 3200001  | 3300000  | 0.046 | 1.098 | normal |
| chr03 | 3300001  | 3400000  | 0.071 | 1.216 | normal |
| chr03 | 3400001  | 3500000  | 0.061 | 1.067 | normal |

|       |         |         |       |       |        |
|-------|---------|---------|-------|-------|--------|
| chr03 | 3500001 | 3600000 | 0.076 | 0.974 | normal |
| chr03 | 3600001 | 3700000 | 0.111 | 1.112 | normal |
| chr03 | 3700001 | 3800000 | 0.108 | 1.125 | normal |
| chr03 | 3800001 | 3900000 | 0.030 | 1.039 | normal |
| chr03 | 3900001 | 4000000 | 0.030 | 1.045 | normal |
| chr03 | 4000001 | 4100000 | 0.072 | 1.120 | normal |
| chr03 | 4100001 | 4200000 | 0.185 | 1.528 | sig    |
| chr03 | 4200001 | 4300000 | 0.094 | 1.299 | normal |
| chr03 | 4300001 | 4400000 | 0.038 | 0.853 | normal |
| chr03 | 4400001 | 4500000 | 0.044 | 0.820 | normal |
| chr03 | 4500001 | 4600000 | 0.066 | 1.230 | normal |
| chr03 | 4600001 | 4700000 | 0.049 | 1.054 | normal |
| chr03 | 4700001 | 4800000 | 0.088 | 1.049 | normal |
| chr03 | 4800001 | 4900000 | 0.050 | 1.114 | normal |
| chr03 | 4900001 | 5000000 | 0.096 | 1.091 | normal |
| chr03 | 5000001 | 5100000 | 0.062 | 1.073 | normal |
| chr03 | 5100001 | 5200000 | 0.082 | 1.213 | normal |
| chr03 | 5200001 | 5300000 | 0.131 | 0.989 | normal |
| chr03 | 5300001 | 5400000 | 0.071 | 1.046 | normal |
| chr03 | 5400001 | 5500000 | 0.096 | 0.884 | normal |
| chr03 | 5500001 | 5600000 | 0.088 | 0.987 | normal |
| chr03 | 5600001 | 5700000 | 0.043 | 0.982 | normal |
| chr03 | 5700001 | 5800000 | 0.137 | 1.034 | normal |
| chr03 | 5800001 | 5900000 | 0.101 | 1.014 | normal |
| chr03 | 5900001 | 6000000 | 0.053 | 1.188 | normal |
| chr03 | 6000001 | 6100000 | 0.035 | 1.153 | normal |
| chr03 | 6100001 | 6200000 | 0.109 | 1.458 | normal |
| chr03 | 6200001 | 6300000 | 0.072 | 1.048 | normal |
| chr03 | 6300001 | 6400000 | 0.111 | 0.778 | normal |
| chr03 | 6400001 | 6500000 | 0.051 | 1.115 | normal |
| chr03 | 6500001 | 6600000 | 0.073 | 0.967 | normal |
| chr03 | 6600001 | 6700000 | 0.085 | 1.195 | normal |
| chr03 | 6700001 | 6800000 | 0.099 | 0.910 | normal |
| chr03 | 6800001 | 6900000 | 0.082 | 0.849 | normal |
| chr03 | 6900001 | 7000000 | 0.052 | 0.961 | normal |
| chr03 | 7000001 | 7100000 | 0.094 | 0.769 | normal |
| chr03 | 7100001 | 7200000 | 0.112 | 0.697 | normal |
| chr03 | 7200001 | 7300000 | 0.123 | 0.987 | normal |
| chr03 | 7300001 | 7400000 | 0.074 | 0.859 | normal |
| chr03 | 7400001 | 7500000 | 0.089 | 0.891 | normal |
| chr03 | 7500001 | 7600000 | 0.083 | 0.872 | normal |
| chr03 | 7600001 | 7700000 | 0.041 | 1.041 | normal |
| chr03 | 7700001 | 7800000 | 0.052 | 0.918 | normal |
| chr03 | 7800001 | 7900000 | 0.062 | 1.132 | normal |

|       |          |          |       |       |        |
|-------|----------|----------|-------|-------|--------|
| chr03 | 7900001  | 8000000  | 0.067 | 1.022 | normal |
| chr03 | 8000001  | 8100000  | 0.062 | 0.914 | normal |
| chr03 | 8100001  | 8200000  | 0.117 | 0.788 | normal |
| chr03 | 8200001  | 8300000  | 0.062 | 1.092 | normal |
| chr03 | 8300001  | 8400000  | 0.030 | 1.099 | normal |
| chr03 | 8400001  | 8500000  | 0.051 | 0.897 | normal |
| chr03 | 8500001  | 8600000  | 0.055 | 1.057 | normal |
| chr03 | 8600001  | 8700000  | 0.056 | 0.946 | normal |
| chr03 | 8700001  | 8800000  | 0.065 | 0.885 | normal |
| chr03 | 8800001  | 8900000  | 0.077 | 0.963 | normal |
| chr03 | 8900001  | 9000000  | 0.032 | 0.985 | normal |
| chr03 | 9000001  | 9100000  | 0.055 | 1.067 | normal |
| chr03 | 9100001  | 9200000  | 0.114 | 1.016 | normal |
| chr03 | 9200001  | 9300000  | 0.049 | 0.975 | normal |
| chr03 | 9300001  | 9400000  | 0.009 | 1.056 | normal |
| chr03 | 9400001  | 9500000  | 0.022 | 1.093 | normal |
| chr03 | 9500001  | 9600000  | 0.041 | 0.936 | normal |
| chr03 | 9600001  | 9700000  | 0.034 | 0.827 | normal |
| chr03 | 9700001  | 9800000  | 0.063 | 0.995 | normal |
| chr03 | 9800001  | 9900000  | 0.076 | 1.064 | normal |
| chr03 | 9900001  | 10000000 | 0.121 | 1.056 | normal |
| chr03 | 10000001 | 10100000 | 0.104 | 1.152 | normal |
| chr03 | 10100001 | 10200000 | 0.108 | 1.113 | normal |
| chr03 | 10200001 | 10300000 | 0.135 | 1.582 | normal |
| chr03 | 10300001 | 10400000 | 0.103 | 1.010 | normal |
| chr03 | 10400001 | 10500000 | 0.098 | 1.665 | normal |
| chr03 | 10500001 | 10600000 | 0.097 | 1.083 | normal |
| chr03 | 10600001 | 10700000 | 0.094 | 1.042 | normal |
| chr03 | 10700001 | 10800000 | 0.135 | 1.483 | normal |
| chr03 | 10800001 | 10900000 | 0.053 | 1.263 | normal |
| chr03 | 10900001 | 11000000 | 0.108 | 0.912 | normal |
| chr03 | 11000001 | 11100000 | 0.122 | 1.006 | normal |
| chr03 | 11100001 | 11200000 | 0.172 | 0.780 | normal |
| chr03 | 11200001 | 11300000 | 0.196 | 0.897 | normal |
| chr03 | 11300001 | 11400000 | 0.082 | 0.743 | normal |
| chr03 | 11400001 | 11500000 | 0.102 | 0.892 | normal |
| chr03 | 11500001 | 11600000 | 0.131 | 1.218 | normal |
| chr03 | 11600001 | 11700000 | 0.107 | 0.999 | normal |
| chr03 | 11700001 | 11800000 | 0.108 | 1.019 | normal |
| chr03 | 11800001 | 11900000 | 0.093 | 0.969 | normal |
| chr03 | 11900001 | 12000000 | 0.071 | 0.925 | normal |
| chr03 | 12000001 | 12100000 | 0.064 | 0.706 | normal |
| chr03 | 12100001 | 12200000 | 0.087 | 0.923 | normal |
| chr03 | 12200001 | 12300000 | 0.105 | 0.747 | normal |

|       |          |          |       |       |        |
|-------|----------|----------|-------|-------|--------|
| chr03 | 12300001 | 12400000 | 0.037 | 1.332 | normal |
| chr03 | 12400001 | 12500000 | 0.076 | 0.965 | normal |
| chr03 | 12500001 | 12600000 | 0.024 | 1.046 | normal |
| chr03 | 12600001 | 12700000 | 0.050 | 0.989 | normal |
| chr03 | 12700001 | 12800000 | 0.050 | 0.818 | normal |
| chr03 | 12800001 | 12900000 | 0.184 | 0.626 | normal |
| chr03 | 12900001 | 13000000 | 0.077 | 1.480 | normal |
| chr03 | 13000001 | 13100000 | 0.059 | 2.062 | normal |
| chr03 | 13100001 | 13200000 | 0.102 | 1.239 | normal |
| chr03 | 13200001 | 13300000 | 0.055 | 0.842 | normal |
| chr03 | 13300001 | 13400000 | 0.046 | 0.895 | normal |
| chr03 | 13400001 | 13500000 | 0.076 | 1.527 | normal |
| chr03 | 13500001 | 13600000 | 0.089 | 2.153 | normal |
| chr03 | 13600001 | 13700000 | 0.098 | 0.937 | normal |
| chr03 | 13700001 | 13800000 | 0.095 | 0.990 | normal |
| chr03 | 13800001 | 13900000 | 0.098 | 0.774 | normal |
| chr03 | 13900001 | 14000000 | 0.083 | 0.863 | normal |
| chr03 | 14000001 | 14100000 | 0.084 | 0.905 | normal |
| chr03 | 14100001 | 14200000 | 0.075 | 0.839 | normal |
| chr03 | 14200001 | 14300000 | 0.032 | 1.019 | normal |
| chr03 | 14300001 | 14400000 | 0.020 | 1.228 | normal |
| chr03 | 14400001 | 14500000 | 0.028 | 1.248 | normal |
| chr03 | 14500001 | 14600000 | 0.034 | 1.014 | normal |
| chr03 | 14600001 | 14700000 | 0.025 | 1.043 | normal |
| chr03 | 14700001 | 14800000 | 0.071 | 1.123 | normal |
| chr03 | 14800001 | 14900000 | 0.084 | 0.937 | normal |
| chr03 | 14900001 | 15000000 | 0.076 | 1.196 | normal |
| chr03 | 15000001 | 15100000 | 0.118 | 0.817 | normal |
| chr03 | 15100001 | 15200000 | 0.135 | 0.745 | normal |
| chr03 | 15200001 | 15300000 | 0.105 | 0.808 | normal |
| chr03 | 15300001 | 15400000 | 0.139 | 1.078 | normal |
| chr03 | 15400001 | 15500000 | 0.079 | 0.854 | normal |
| chr03 | 15500001 | 15600000 | 0.028 | 0.928 | normal |
| chr03 | 15600001 | 15700000 | 0.036 | 0.935 | normal |
| chr03 | 15700001 | 15800000 | 0.029 | 1.073 | normal |
| chr03 | 15800001 | 15900000 | 0.045 | 1.016 | normal |
| chr03 | 15900001 | 16000000 | 0.061 | 0.883 | normal |
| chr03 | 16000001 | 16100000 | 0.145 | 0.642 | normal |
| chr03 | 16100001 | 16200000 | 0.099 | 0.844 | normal |
| chr03 | 16200001 | 16300000 | 0.011 | 0.936 | normal |
| chr03 | 16300001 | 16400000 | 0.032 | 0.919 | normal |
| chr03 | 16400001 | 16500000 | 0.105 | 0.835 | normal |
| chr03 | 16500001 | 16600000 | 0.024 | 1.031 | normal |
| chr03 | 16600001 | 16700000 | 0.007 | 1.142 | normal |

|       |          |          |       |       |        |
|-------|----------|----------|-------|-------|--------|
| chr03 | 16700001 | 16800000 | 0.014 | 1.117 | normal |
| chr03 | 16800001 | 16900000 | 0.054 | 0.827 | normal |
| chr03 | 16900001 | 17000000 | 0.031 | 0.957 | normal |
| chr03 | 17000001 | 17100000 | 0.049 | 1.059 | normal |
| chr03 | 17100001 | 17200000 | 0.037 | 1.084 | normal |
| chr03 | 17200001 | 17300000 | 0.050 | 1.022 | normal |
| chr03 | 17300001 | 17400000 | 0.036 | 1.005 | normal |
| chr03 | 17400001 | 17500000 | 0.051 | 1.012 | normal |
| chr03 | 17500001 | 17600000 | 0.075 | 1.144 | normal |
| chr03 | 17600001 | 17700000 | 0.059 | 0.797 | normal |
| chr03 | 17700001 | 17800000 | 0.040 | 0.958 | normal |
| chr03 | 17800001 | 17900000 | 0.055 | 1.011 | normal |
| chr03 | 17900001 | 18000000 | 0.065 | 1.025 | normal |
| chr03 | 18000001 | 18100000 | 0.055 | 1.128 | normal |
| chr03 | 18100001 | 18200000 | 0.050 | 1.015 | normal |
| chr03 | 18200001 | 18300000 | 0.046 | 0.931 | normal |
| chr03 | 18300001 | 18400000 | 0.048 | 0.915 | normal |
| chr03 | 18400001 | 18500000 | 0.120 | 1.051 | normal |
| chr03 | 18500001 | 18600000 | 0.088 | 0.821 | normal |
| chr03 | 18600001 | 18700000 | 0.063 | 0.991 | normal |
| chr03 | 18700001 | 18800000 | 0.022 | 1.042 | normal |
| chr03 | 18800001 | 18900000 | 0.054 | 1.178 | normal |
| chr03 | 18900001 | 19000000 | 0.042 | 1.041 | normal |
| chr03 | 19000001 | 19100000 | 0.049 | 0.870 | normal |
| chr03 | 19100001 | 19200000 | 0.043 | 1.311 | normal |
| chr03 | 19200001 | 19300000 | 0.051 | 1.136 | normal |
| chr03 | 19300001 | 19400000 | 0.048 | 1.032 | normal |
| chr03 | 19400001 | 19500000 | 0.041 | 1.186 | normal |
| chr03 | 19500001 | 19600000 | 0.055 | 1.120 | normal |
| chr03 | 19600001 | 19700000 | 0.049 | 1.006 | normal |
| chr03 | 19700001 | 19800000 | 0.072 | 0.858 | normal |
| chr03 | 19800001 | 19900000 | 0.070 | 1.022 | normal |
| chr03 | 19900001 | 20000000 | 0.036 | 1.072 | normal |
| chr03 | 20000001 | 20100000 | 0.066 | 1.100 | normal |
| chr03 | 20100001 | 20200000 | 0.045 | 0.961 | normal |
| chr03 | 20200001 | 20300000 | 0.061 | 1.231 | normal |
| chr03 | 20300001 | 20400000 | 0.043 | 1.046 | normal |
| chr03 | 20400001 | 20500000 | 0.085 | 1.131 | normal |
| chr03 | 20500001 | 20600000 | 0.046 | 1.214 | normal |
| chr03 | 20600001 | 20700000 | 0.052 | 1.225 | normal |
| chr03 | 20700001 | 20800000 | 0.059 | 1.429 | normal |
| chr03 | 20800001 | 20900000 | 0.072 | 0.955 | normal |
| chr03 | 20900001 | 21000000 | 0.055 | 1.231 | normal |
| chr03 | 21000001 | 21100000 | 0.057 | 1.314 | normal |

|       |          |          |       |       |        |
|-------|----------|----------|-------|-------|--------|
| chr03 | 21100001 | 21200000 | 0.070 | 0.985 | normal |
| chr03 | 21200001 | 21300000 | 0.121 | 0.927 | normal |
| chr03 | 21300001 | 21400000 | 0.114 | 0.977 | normal |
| chr03 | 21400001 | 21500000 | 0.105 | 0.943 | normal |
| chr03 | 21500001 | 21600000 | 0.105 | 0.983 | normal |
| chr03 | 21600001 | 21700000 | 0.096 | 0.953 | normal |
| chr03 | 21700001 | 21800000 | 0.119 | 0.906 | normal |
| chr03 | 21800001 | 21900000 | 0.109 | 0.974 | normal |
| chr03 | 21900001 | 22000000 | 0.127 | 0.876 | normal |
| chr03 | 22000001 | 22100000 | 0.056 | 1.093 | normal |
| chr03 | 22100001 | 22200000 | 0.059 | 1.059 | normal |
| chr03 | 22200001 | 22300000 | 0.141 | 0.976 | normal |
| chr03 | 22300001 | 22400000 | 0.183 | 0.939 | normal |
| chr03 | 22400001 | 22500000 | 0.176 | 0.928 | normal |
| chr03 | 22500001 | 22600000 | 0.155 | 0.915 | normal |
| chr03 | 22600001 | 22700000 | 0.149 | 0.873 | normal |
| chr03 | 22700001 | 22800000 | 0.137 | 0.878 | normal |
| chr03 | 22800001 | 22900000 | 0.145 | 0.815 | normal |
| chr03 | 22900001 | 23000000 | 0.091 | 0.936 | normal |
| chr03 | 23000001 | 23100000 | 0.064 | 0.833 | normal |
| chr03 | 23100001 | 23200000 | 0.067 | 0.835 | normal |
| chr03 | 23200001 | 23300000 | 0.110 | 1.060 | normal |
| chr03 | 23300001 | 23400000 | 0.121 | 1.235 | normal |
| chr03 | 23400001 | 23500000 | 0.037 | 1.082 | normal |
| chr03 | 23500001 | 23600000 | 0.020 | 1.180 | normal |
| chr03 | 23600001 | 23700000 | 0.048 | 1.035 | normal |
| chr03 | 23700001 | 23800000 | 0.041 | 1.005 | normal |
| chr03 | 23800001 | 23900000 | 0.149 | 1.252 | normal |
| chr03 | 23900001 | 24000000 | 0.179 | 0.814 | normal |
| chr03 | 24000001 | 24100000 | 0.076 | 1.078 | normal |
| chr03 | 24100001 | 24200000 | 0.076 | 0.959 | normal |
| chr03 | 24200001 | 24300000 | 0.044 | 1.389 | normal |
| chr03 | 24300001 | 24400000 | 0.059 | 1.381 | normal |
| chr03 | 24400001 | 24500000 | 0.100 | 1.254 | normal |
| chr03 | 24500001 | 24600000 | 0.060 | 1.371 | normal |
| chr03 | 24600001 | 24700000 | 0.019 | 1.484 | normal |
| chr03 | 24700001 | 24800000 | 0.038 | 1.436 | normal |
| chr03 | 24800001 | 24900000 | 0.075 | 1.198 | normal |
| chr03 | 24900001 | 25000000 | 0.028 | 1.115 | normal |
| chr03 | 25000001 | 25100000 | 0.056 | 1.040 | normal |
| chr03 | 25100001 | 25200000 | 0.096 | 1.068 | normal |
| chr03 | 25200001 | 25300000 | 0.131 | 0.810 | normal |
| chr03 | 25300001 | 25400000 | 0.063 | 1.046 | normal |
| chr03 | 25400001 | 25500000 | 0.111 | 1.015 | normal |



|       |          |          |       |       |        |
|-------|----------|----------|-------|-------|--------|
| chr03 | 25500001 | 25600000 | 0.089 | 0.753 | normal |
| chr03 | 25600001 | 25700000 | 0.088 | 1.018 | normal |
| chr03 | 25700001 | 25800000 | 0.085 | 1.449 | normal |
| chr03 | 25800001 | 25900000 | 0.066 | 1.647 | normal |
| chr03 | 25900001 | 26000000 | 0.123 | 0.797 | normal |
| chr03 | 26000001 | 26100000 | 0.043 | 0.904 | normal |
| chr03 | 26100001 | 26200000 | 0.078 | 1.417 | normal |
| chr03 | 26200001 | 26300000 | 0.094 | 0.964 | normal |
| chr03 | 26300001 | 26400000 | 0.062 | 1.029 | normal |
| chr03 | 26400001 | 26500000 | 0.048 | 1.014 | normal |
| chr03 | 26500001 | 26600000 | 0.053 | 1.330 | normal |
| chr03 | 26600001 | 26700000 | 0.050 | 1.193 | normal |
| chr03 | 26700001 | 26800000 | 0.019 | 1.087 | normal |
| chr03 | 26800001 | 26900000 | 0.037 | 1.064 | normal |
| chr03 | 26900001 | 27000000 | 0.038 | 1.144 | normal |
| chr03 | 27000001 | 27100000 | 0.057 | 1.065 | normal |
| chr03 | 27100001 | 27200000 | 0.042 | 0.981 | normal |
| chr03 | 27200001 | 27300000 | 0.055 | 1.478 | normal |
| chr03 | 27300001 | 27400000 | 0.053 | 1.585 | normal |
| chr03 | 27400001 | 27500000 | 0.094 | 0.911 | normal |
| chr03 | 27500001 | 27600000 | 0.072 | 1.423 | normal |
| chr03 | 27600001 | 27700000 | 0.081 | 1.318 | normal |
| chr03 | 27700001 | 27800000 | 0.063 | 1.330 | normal |
| chr03 | 27800001 | 27900000 | 0.076 | 1.044 | normal |
| chr03 | 27900001 | 28000000 | 0.106 | 1.129 | normal |
| chr03 | 28000001 | 28100000 | 0.014 | 0.960 | normal |
| chr03 | 28100001 | 28200000 | 0.070 | 1.340 | normal |
| chr03 | 28200001 | 28300000 | 0.105 | 1.057 | normal |
| chr03 | 28300001 | 28400000 | 0.092 | 1.116 | normal |
| chr03 | 28400001 | 28500000 | 0.101 | 1.006 | normal |
| chr03 | 28500001 | 28600000 | 0.096 | 2.762 | normal |
| chr03 | 28600001 | 28700000 | 0.093 | 0.923 | normal |
| chr03 | 28700001 | 28800000 | 0.147 | 1.239 | normal |
| chr03 | 28800001 | 28900000 | 0.162 | 0.812 | normal |
| chr03 | 28900001 | 29000000 | 0.092 | 0.824 | normal |
| chr03 | 29000001 | 29100000 | 0.159 | 0.655 | normal |
| chr03 | 29100001 | 29200000 | 0.079 | 0.919 | normal |
| chr03 | 29200001 | 29300000 | 0.113 | 1.241 | normal |
| chr03 | 29300001 | 29400000 | 0.105 | 0.980 | normal |
| chr03 | 29400001 | 29500000 | 0.074 | 0.867 | normal |
| chr03 | 29500001 | 29600000 | 0.102 | 1.446 | normal |
| chr03 | 29600001 | 29700000 | 0.073 | 0.995 | normal |
| chr03 | 29700001 | 29800000 | 0.055 | 0.964 | normal |
| chr03 | 29800001 | 29900000 | 0.092 | 1.061 | normal |

|       |          |          |       |       |        |
|-------|----------|----------|-------|-------|--------|
| chr03 | 29900001 | 30000000 | 0.111 | 1.027 | normal |
| chr03 | 30000001 | 30100000 | 0.126 | 0.852 | normal |
| chr03 | 30100001 | 30200000 | 0.059 | 1.156 | normal |
| chr03 | 30200001 | 30300000 | 0.151 | 1.073 | normal |
| chr03 | 30300001 | 30400000 | 0.121 | 0.984 | normal |
| chr03 | 30400001 | 30500000 | 0.186 | 0.647 | normal |
| chr03 | 30500001 | 30600000 | 0.121 | 1.081 | normal |
| chr03 | 30600001 | 30700000 | 0.087 | 0.966 | normal |
| chr03 | 30700001 | 30800000 | 0.116 | 0.857 | normal |
| chr03 | 30800001 | 30900000 | 0.033 | 1.210 | normal |
| chr03 | 30900001 | 31000000 | 0.041 | 0.825 | normal |
| chr04 | 1        | 100000   | 0.040 | 1.152 | normal |
| chr04 | 100001   | 200000   | 0.058 | 1.209 | normal |
| chr04 | 200001   | 300000   | 0.086 | 0.861 | normal |
| chr04 | 300001   | 400000   | 0.060 | 1.560 | normal |
| chr04 | 400001   | 500000   | 0.080 | 1.627 | normal |
| chr04 | 500001   | 600000   | 0.053 | 1.330 | normal |
| chr04 | 600001   | 700000   | 0.097 | 1.214 | normal |
| chr04 | 700001   | 800000   | 0.047 | 1.094 | normal |
| chr04 | 800001   | 900000   | 0.065 | 1.413 | normal |
| chr04 | 900001   | 1000000  | 0.071 | 0.999 | normal |
| chr04 | 1000001  | 1100000  | 0.038 | 0.980 | normal |
| chr04 | 1100001  | 1200000  | 0.072 | 1.124 | normal |
| chr04 | 1200001  | 1300000  | 0.075 | 1.198 | normal |
| chr04 | 1300001  | 1400000  | 0.056 | 1.233 | normal |
| chr04 | 1400001  | 1500000  | 0.053 | 1.119 | normal |
| chr04 | 1500001  | 1600000  | 0.050 | 1.035 | normal |
| chr04 | 1600001  | 1700000  | 0.029 | 1.033 | normal |
| chr04 | 1700001  | 1800000  | 0.077 | 0.917 | normal |
| chr04 | 1800001  | 1900000  | 0.063 | 1.351 | normal |
| chr04 | 1900001  | 2000000  | 0.044 | 1.087 | normal |
| chr04 | 2000001  | 2100000  | 0.019 | 1.037 | normal |
| chr04 | 2100001  | 2200000  | 0.073 | 1.200 | normal |
| chr04 | 2200001  | 2300000  | 0.083 | 1.052 | normal |
| chr04 | 2300001  | 2400000  | 0.079 | 1.496 | normal |
| chr04 | 2400001  | 2500000  | 0.039 | 1.191 | normal |
| chr04 | 2500001  | 2600000  | 0.048 | 1.080 | normal |
| chr04 | 2600001  | 2700000  | 0.050 | 1.320 | normal |
| chr04 | 2700001  | 2800000  | 0.023 | 1.013 | normal |
| chr04 | 2800001  | 2900000  | 0.049 | 1.072 | normal |
| chr04 | 2900001  | 3000000  | 0.049 | 1.059 | normal |
| chr04 | 3000001  | 3100000  | 0.041 | 1.064 | normal |
| chr04 | 3100001  | 3200000  | 0.036 | 0.883 | normal |
| chr04 | 3200001  | 3300000  | 0.052 | 0.853 | normal |

|       |         |         |       |       |        |
|-------|---------|---------|-------|-------|--------|
| chr04 | 3300001 | 3400000 | 0.028 | 1.191 | normal |
| chr04 | 3400001 | 3500000 | 0.032 | 0.978 | normal |
| chr04 | 3500001 | 3600000 | 0.080 | 1.270 | normal |
| chr04 | 3600001 | 3700000 | 0.075 | 1.096 | normal |
| chr04 | 3700001 | 3800000 | 0.068 | 1.015 | normal |
| chr04 | 3800001 | 3900000 | 0.071 | 0.845 | normal |
| chr04 | 3900001 | 4000000 | 0.089 | 0.856 | normal |
| chr04 | 4000001 | 4100000 | 0.095 | 0.955 | normal |
| chr04 | 4100001 | 4200000 | 0.057 | 1.119 | normal |
| chr04 | 4200001 | 4300000 | 0.054 | 0.987 | normal |
| chr04 | 4300001 | 4400000 | 0.047 | 0.986 | normal |
| chr04 | 4400001 | 4500000 | 0.026 | 1.098 | normal |
| chr04 | 4500001 | 4600000 | 0.034 | 0.991 | normal |
| chr04 | 4600001 | 4700000 | 0.030 | 0.983 | normal |
| chr04 | 4700001 | 4800000 | 0.034 | 1.047 | normal |
| chr04 | 4800001 | 4900000 | 0.107 | 0.978 | normal |
| chr04 | 4900001 | 5000000 | 0.089 | 0.888 | normal |
| chr04 | 5000001 | 5100000 | 0.062 | 1.072 | normal |
| chr04 | 5100001 | 5200000 | 0.052 | 1.089 | normal |
| chr04 | 5200001 | 5300000 | 0.062 | 0.976 | normal |
| chr04 | 5300001 | 5400000 | 0.084 | 0.993 | normal |
| chr04 | 5400001 | 5500000 | 0.038 | 0.991 | normal |
| chr04 | 5500001 | 5600000 | 0.060 | 1.216 | normal |
| chr04 | 5600001 | 5700000 | 0.060 | 1.234 | normal |
| chr04 | 5700001 | 5800000 | 0.035 | 1.041 | normal |
| chr04 | 5800001 | 5900000 | 0.037 | 1.110 | normal |
| chr04 | 5900001 | 6000000 | 0.094 | 1.208 | normal |
| chr04 | 6000001 | 6100000 | 0.042 | 1.080 | normal |
| chr04 | 6100001 | 6200000 | 0.039 | 1.152 | normal |
| chr04 | 6200001 | 6300000 | 0.037 | 1.397 | normal |
| chr04 | 6300001 | 6400000 | 0.054 | 1.360 | normal |
| chr04 | 6400001 | 6500000 | 0.060 | 1.259 | normal |
| chr04 | 6500001 | 6600000 | 0.043 | 1.224 | normal |
| chr04 | 6600001 | 6700000 | 0.070 | 1.315 | normal |
| chr04 | 6700001 | 6800000 | 0.052 | 1.288 | normal |
| chr04 | 6800001 | 6900000 | 0.047 | 0.974 | normal |
| chr04 | 6900001 | 7000000 | 0.069 | 0.792 | normal |
| chr04 | 7000001 | 7100000 | 0.114 | 0.914 | normal |
| chr04 | 7100001 | 7200000 | 0.045 | 1.254 | normal |
| chr04 | 7200001 | 7300000 | 0.069 | 1.210 | normal |
| chr04 | 7300001 | 7400000 | 0.062 | 0.877 | normal |
| chr04 | 7400001 | 7500000 | 0.044 | 0.994 | normal |
| chr04 | 7500001 | 7600000 | 0.045 | 1.291 | normal |
| chr04 | 7600001 | 7700000 | 0.054 | 1.157 | normal |

|       |          |          |       |       |        |
|-------|----------|----------|-------|-------|--------|
| chr04 | 7700001  | 7800000  | 0.050 | 0.995 | normal |
| chr04 | 7800001  | 7900000  | 0.084 | 0.684 | normal |
| chr04 | 7900001  | 8000000  | 0.078 | 0.881 | normal |
| chr04 | 8000001  | 8100000  | 0.064 | 0.912 | normal |
| chr04 | 8100001  | 8200000  | 0.068 | 0.938 | normal |
| chr04 | 8200001  | 8300000  | 0.063 | 1.257 | normal |
| chr04 | 8300001  | 8400000  | 0.050 | 0.939 | normal |
| chr04 | 8400001  | 8500000  | 0.109 | 0.901 | normal |
| chr04 | 8500001  | 8600000  | 0.057 | 0.879 | normal |
| chr04 | 8600001  | 8700000  | 0.119 | 0.717 | normal |
| chr04 | 8700001  | 8800000  | 0.083 | 1.001 | normal |
| chr04 | 8800001  | 8900000  | 0.043 | 0.929 | normal |
| chr04 | 8900001  | 9000000  | 0.048 | 1.025 | normal |
| chr04 | 9000001  | 9100000  | 0.047 | 1.000 | normal |
| chr04 | 9100001  | 9200000  | 0.062 | 1.142 | normal |
| chr04 | 9200001  | 9300000  | 0.086 | 1.146 | normal |
| chr04 | 9300001  | 9400000  | 0.107 | 1.424 | normal |
| chr04 | 9400001  | 9500000  | 0.056 | 0.914 | normal |
| chr04 | 9500001  | 9600000  | 0.069 | 0.952 | normal |
| chr04 | 9600001  | 9700000  | 0.085 | 1.414 | normal |
| chr04 | 9700001  | 9800000  | 0.080 | 1.417 | normal |
| chr04 | 9800001  | 9900000  | 0.074 | 1.288 | normal |
| chr04 | 9900001  | 10000000 | 0.061 | 1.065 | normal |
| chr04 | 10000001 | 10100000 | 0.112 | 0.963 | normal |
| chr04 | 10100001 | 10200000 | 0.059 | 1.015 | normal |
| chr04 | 10200001 | 10300000 | 0.046 | 0.938 | normal |
| chr04 | 10300001 | 10400000 | 0.038 | 0.914 | normal |
| chr04 | 10400001 | 10500000 | 0.081 | 0.997 | normal |
| chr04 | 10500001 | 10600000 | 0.052 | 1.110 | normal |
| chr04 | 10600001 | 10700000 | 0.048 | 1.041 | normal |
| chr04 | 10700001 | 10800000 | 0.062 | 0.938 | normal |
| chr04 | 10800001 | 10900000 | 0.121 | 0.586 | normal |
| chr04 | 10900001 | 11000000 | 0.120 | 0.903 | normal |
| chr04 | 11000001 | 11100000 | 0.082 | 1.034 | normal |
| chr04 | 11100001 | 11200000 | 0.082 | 0.902 | normal |
| chr04 | 11200001 | 11300000 | 0.108 | 0.917 | normal |
| chr04 | 11300001 | 11400000 | 0.093 | 0.944 | normal |
| chr04 | 11400001 | 11500000 | 0.063 | 1.168 | normal |
| chr04 | 11500001 | 11600000 | 0.097 | 0.918 | normal |
| chr04 | 11600001 | 11700000 | 0.091 | 1.187 | normal |
| chr04 | 11700001 | 11800000 | 0.066 | 1.110 | normal |
| chr04 | 11800001 | 11900000 | 0.082 | 1.151 | normal |
| chr04 | 11900001 | 12000000 | 0.082 | 1.165 | normal |
| chr04 | 12000001 | 12100000 | 0.082 | 1.186 | normal |

|       |          |          |       |       |        |
|-------|----------|----------|-------|-------|--------|
| chr04 | 12100001 | 12200000 | 0.093 | 1.416 | normal |
| chr04 | 12200001 | 12300000 | 0.086 | 0.976 | normal |
| chr04 | 12300001 | 12400000 | 0.084 | 0.889 | normal |
| chr04 | 12400001 | 12500000 | 0.041 | 1.085 | normal |
| chr04 | 12500001 | 12600000 | 0.058 | 1.125 | normal |
| chr04 | 12600001 | 12700000 | 0.036 | 0.981 | normal |
| chr04 | 12700001 | 12800000 | 0.007 | 1.046 | normal |
| chr04 | 12800001 | 12900000 | 0.034 | 0.968 | normal |
| chr04 | 12900001 | 13000000 | 0.075 | 0.897 | normal |
| chr04 | 13000001 | 13100000 | 0.065 | 0.942 | normal |
| chr04 | 13100001 | 13200000 | 0.081 | 0.820 | normal |
| chr04 | 13200001 | 13300000 | 0.040 | 1.089 | normal |
| chr04 | 13300001 | 13400000 | 0.039 | 1.131 | normal |
| chr04 | 13400001 | 13500000 | 0.071 | 0.909 | normal |
| chr04 | 13500001 | 13600000 | 0.029 | 0.957 | normal |
| chr04 | 13600001 | 13700000 | 0.061 | 1.061 | normal |
| chr04 | 13700001 | 13800000 | 0.080 | 0.989 | normal |
| chr04 | 13800001 | 13900000 | 0.081 | 1.872 | normal |
| chr04 | 13900001 | 14000000 | 0.098 | 1.776 | normal |
| chr04 | 14000001 | 14100000 | 0.072 | 1.232 | normal |
| chr04 | 14100001 | 14200000 | 0.035 | 1.054 | normal |
| chr04 | 14200001 | 14300000 | 0.039 | 1.062 | normal |
| chr04 | 14300001 | 14400000 | 0.054 | 1.164 | normal |
| chr04 | 14400001 | 14500000 | 0.024 | 0.935 | normal |
| chr04 | 14500001 | 14600000 | 0.034 | 0.894 | normal |
| chr04 | 14600001 | 14700000 | 0.074 | 0.789 | normal |
| chr04 | 14700001 | 14800000 | 0.038 | 1.071 | normal |
| chr04 | 14800001 | 14900000 | 0.054 | 1.081 | normal |
| chr04 | 14900001 | 15000000 | 0.092 | 0.926 | normal |
| chr04 | 15000001 | 15100000 | 0.098 | 0.861 | normal |
| chr04 | 15100001 | 15200000 | 0.058 | 1.108 | normal |
| chr04 | 15200001 | 15300000 | 0.070 | 1.304 | normal |
| chr04 | 15300001 | 15400000 | 0.056 | 1.065 | normal |
| chr04 | 15400001 | 15500000 | 0.032 | 1.032 | normal |
| chr04 | 15500001 | 15600000 | 0.031 | 0.991 | normal |
| chr04 | 15600001 | 15700000 | 0.010 | 1.012 | normal |
| chr04 | 15700001 | 15800000 | 0.009 | 0.987 | normal |
| chr04 | 15800001 | 15900000 | 0.010 | 1.005 | normal |
| chr04 | 15900001 | 16000000 | 0.007 | 1.004 | normal |
| chr04 | 16000001 | 16100000 | 0.004 | 0.997 | normal |
| chr04 | 16100001 | 16200000 | 0.009 | 1.001 | normal |
| chr04 | 16200001 | 16300000 | 0.050 | 1.118 | normal |
| chr04 | 16300001 | 16400000 | 0.022 | 0.958 | normal |
| chr04 | 16500001 | 16600000 | 0.094 | 0.746 | normal |

|       |          |          |       |       |        |
|-------|----------|----------|-------|-------|--------|
| chr04 | 16600001 | 16700000 | 0.077 | 0.786 | normal |
| chr04 | 16700001 | 16800000 | 0.028 | 1.017 | normal |
| chr04 | 16800001 | 16900000 | 0.083 | 1.456 | normal |
| chr04 | 16900001 | 17000000 | 0.067 | 1.083 | normal |
| chr04 | 17000001 | 17100000 | 0.168 | 0.515 | normal |
| chr04 | 17100001 | 17200000 | 0.155 | 1.313 | normal |
| chr04 | 17200001 | 17300000 | 0.084 | 0.886 | normal |
| chr04 | 17300001 | 17400000 | 0.064 | 1.231 | normal |
| chr04 | 17400001 | 17500000 | 0.110 | 0.645 | normal |
| chr04 | 17500001 | 17600000 | 0.076 | 1.064 | normal |
| chr04 | 17600001 | 17700000 | 0.083 | 1.074 | normal |
| chr04 | 17700001 | 17800000 | 0.032 | 1.225 | normal |
| chr04 | 17800001 | 17900000 | 0.015 | 1.175 | normal |
| chr04 | 17900001 | 18000000 | 0.031 | 0.994 | normal |
| chr04 | 18000001 | 18100000 | 0.044 | 1.098 | normal |
| chr04 | 18100001 | 18200000 | 0.054 | 1.085 | normal |
| chr04 | 18200001 | 18300000 | 0.043 | 1.264 | normal |
| chr04 | 18300001 | 18400000 | 0.047 | 0.973 | normal |
| chr04 | 18400001 | 18500000 | 0.081 | 0.975 | normal |
| chr04 | 18500001 | 18600000 | 0.050 | 0.928 | normal |
| chr04 | 18600001 | 18700000 | 0.040 | 1.025 | normal |
| chr04 | 18700001 | 18800000 | 0.028 | 1.150 | normal |
| chr04 | 18800001 | 18900000 | 0.018 | 1.108 | normal |
| chr04 | 18900001 | 19000000 | 0.017 | 1.174 | normal |
| chr04 | 19000001 | 19100000 | 0.019 | 1.204 | normal |
| chr04 | 19100001 | 19200000 | 0.025 | 1.204 | normal |
| chr04 | 19200001 | 19300000 | 0.031 | 1.461 | normal |
| chr04 | 19300001 | 19400000 | 0.030 | 1.457 | normal |
| chr04 | 19400001 | 19500000 | 0.035 | 1.469 | normal |
| chr04 | 19500001 | 19600000 | 0.033 | 1.390 | normal |
| chr04 | 19600001 | 19700000 | 0.031 | 1.531 | normal |
| chr04 | 19700001 | 19800000 | 0.031 | 1.230 | normal |
| chr04 | 19800001 | 19900000 | 0.040 | 1.056 | normal |
| chr04 | 19900001 | 20000000 | 0.038 | 1.000 | normal |
| chr04 | 20000001 | 20100000 | 0.037 | 1.060 | normal |
| chr04 | 20100001 | 20200000 | 0.039 | 0.908 | normal |
| chr04 | 20200001 | 20300000 | 0.031 | 1.169 | normal |
| chr04 | 20300001 | 20400000 | 0.053 | 1.216 | normal |
| chr04 | 20400001 | 20500000 | 0.030 | 1.166 | normal |
| chr04 | 20500001 | 20600000 | 0.035 | 1.109 | normal |
| chr04 | 20600001 | 20700000 | 0.055 | 1.550 | normal |
| chr04 | 20700001 | 20800000 | 0.021 | 1.198 | normal |
| chr04 | 20800001 | 20900000 | 0.036 | 1.410 | normal |
| chr04 | 20900001 | 21000000 | 0.043 | 1.756 | normal |

|       |          |          |       |       |        |
|-------|----------|----------|-------|-------|--------|
| chr04 | 21000001 | 21100000 | 0.031 | 1.242 | normal |
| chr04 | 21100001 | 21200000 | 0.083 | 1.173 | normal |
| chr04 | 21200001 | 21300000 | 0.038 | 1.305 | normal |
| chr04 | 21300001 | 21400000 | 0.033 | 1.042 | normal |
| chr04 | 21400001 | 21500000 | 0.054 | 1.371 | normal |
| chr04 | 21500001 | 21600000 | 0.031 | 1.219 | normal |
| chr04 | 21600001 | 21700000 | 0.027 | 1.182 | normal |
| chr04 | 21700001 | 21800000 | 0.030 | 1.273 | normal |
| chr04 | 21800001 | 21900000 | 0.041 | 1.011 | normal |
| chr04 | 21900001 | 22000000 | 0.019 | 1.167 | normal |
| chr04 | 22000001 | 22100000 | 0.020 | 1.162 | normal |
| chr04 | 22100001 | 22200000 | 0.028 | 1.074 | normal |
| chr04 | 22200001 | 22300000 | 0.035 | 1.101 | normal |
| chr04 | 22300001 | 22400000 | 0.033 | 1.171 | normal |
| chr04 | 22400001 | 22500000 | 0.027 | 0.921 | normal |
| chr04 | 22500001 | 22600000 | 0.016 | 1.053 | normal |
| chr04 | 22600001 | 22700000 | 0.015 | 1.084 | normal |
| chr04 | 22700001 | 22800000 | 0.049 | 1.169 | normal |
| chr04 | 22800001 | 22900000 | 0.062 | 0.908 | normal |
| chr04 | 22900001 | 23000000 | 0.032 | 1.102 | normal |
| chr04 | 23000001 | 23100000 | 0.049 | 1.020 | normal |
| chr04 | 23100001 | 23200000 | 0.039 | 1.017 | normal |
| chr04 | 23200001 | 23300000 | 0.026 | 0.926 | normal |
| chr04 | 23300001 | 23400000 | 0.043 | 0.964 | normal |
| chr04 | 23400001 | 23500000 | 0.018 | 1.024 | normal |
| chr04 | 23500001 | 23600000 | 0.045 | 1.156 | normal |
| chr04 | 23600001 | 23700000 | 0.053 | 1.065 | normal |
| chr04 | 23700001 | 23800000 | 0.093 | 1.558 | normal |
| chr04 | 23800001 | 23900000 | 0.045 | 1.173 | normal |
| chr04 | 23900001 | 24000000 | 0.055 | 1.008 | normal |
| chr04 | 24000001 | 24100000 | 0.057 | 1.357 | normal |
| chr04 | 24100001 | 24200000 | 0.036 | 1.040 | normal |
| chr04 | 24200001 | 24300000 | 0.092 | 0.887 | normal |
| chr04 | 24300001 | 24400000 | 0.057 | 1.087 | normal |
| chr04 | 24400001 | 24500000 | 0.104 | 0.874 | normal |
| chr04 | 24500001 | 24600000 | 0.132 | 0.836 | normal |
| chr04 | 24600001 | 24700000 | 0.129 | 0.769 | normal |
| chr04 | 24700001 | 24800000 | 0.112 | 0.799 | normal |
| chr04 | 24800001 | 24900000 | 0.092 | 0.908 | normal |
| chr04 | 24900001 | 25000000 | 0.094 | 0.890 | normal |
| chr04 | 25000001 | 25100000 | 0.086 | 0.768 | normal |
| chr04 | 25100001 | 25200000 | 0.067 | 1.144 | normal |
| chr04 | 25200001 | 25300000 | 0.032 | 1.029 | normal |
| chr04 | 25300001 | 25400000 | 0.078 | 0.842 | normal |

|       |          |          |       |       |        |
|-------|----------|----------|-------|-------|--------|
| chr04 | 25400001 | 25500000 | 0.058 | 0.939 | normal |
| chr04 | 25500001 | 25600000 | 0.126 | 0.789 | normal |
| chr04 | 25600001 | 25700000 | 0.027 | 1.328 | normal |
| chr04 | 25700001 | 25800000 | 0.057 | 1.449 | normal |
| chr04 | 25800001 | 25900000 | 0.022 | 1.104 | normal |
| chr04 | 25900001 | 26000000 | 0.047 | 1.143 | normal |
| chr04 | 26000001 | 26100000 | 0.011 | 0.984 | normal |
| chr04 | 26100001 | 26200000 | 0.047 | 1.962 | normal |
| chr04 | 26200001 | 26300000 | 0.084 | 1.900 | normal |
| chr04 | 26300001 | 26400000 | 0.052 | 1.165 | normal |
| chr04 | 26400001 | 26500000 | 0.019 | 1.084 | normal |
| chr04 | 26500001 | 26600000 | 0.023 | 1.000 | normal |
| chr04 | 26600001 | 26700000 | 0.044 | 1.437 | normal |
| chr04 | 26700001 | 26800000 | 0.081 | 0.678 | normal |
| chr04 | 26800001 | 26900000 | 0.056 | 0.819 | normal |
| chr04 | 26900001 | 27000000 | 0.027 | 0.883 | normal |
| chr04 | 27000001 | 27100000 | 0.030 | 0.969 | normal |
| chr04 | 27100001 | 27200000 | 0.039 | 0.953 | normal |
| chr04 | 27200001 | 27300000 | 0.018 | 0.792 | normal |
| chr04 | 27300001 | 27400000 | 0.019 | 0.837 | normal |
| chr04 | 27400001 | 27500000 | 0.026 | 0.841 | normal |
| chr04 | 27500001 | 27600000 | 0.011 | 0.936 | normal |
| chr04 | 27600001 | 27700000 | 0.011 | 0.927 | normal |
| chr04 | 27700001 | 27800000 | 0.010 | 0.889 | normal |
| chr04 | 27800001 | 27900000 | 0.025 | 0.904 | normal |
| chr04 | 27900001 | 28000000 | 0.021 | 0.917 | normal |
| chr04 | 28000001 | 28100000 | 0.016 | 0.835 | normal |
| chr04 | 28100001 | 28200000 | 0.017 | 0.974 | normal |
| chr04 | 28200001 | 28300000 | 0.010 | 0.927 | normal |
| chr04 | 28300001 | 28400000 | 0.037 | 1.185 | normal |
| chr04 | 28400001 | 28500000 | 0.055 | 1.585 | normal |
| chr04 | 28500001 | 28600000 | 0.044 | 1.223 | normal |
| chr04 | 28600001 | 28700000 | 0.036 | 1.158 | normal |
| chr04 | 28700001 | 28800000 | 0.072 | 1.375 | normal |
| chr04 | 28800001 | 28900000 | 0.025 | 1.040 | normal |
| chr04 | 28900001 | 29000000 | 0.049 | 1.010 | normal |
| chr04 | 29000001 | 29100000 | 0.085 | 0.642 | normal |
| chr04 | 29200001 | 29300000 | 0.028 | 1.262 | normal |
| chr04 | 29300001 | 29400000 | 0.057 | 1.037 | normal |
| chr04 | 29400001 | 29500000 | 0.049 | 0.945 | normal |
| chr04 | 29500001 | 29600000 | 0.053 | 0.977 | normal |
| chr04 | 29600001 | 29700000 | 0.037 | 0.932 | normal |
| chr04 | 29700001 | 29800000 | 0.029 | 0.999 | normal |
| chr04 | 29800001 | 29900000 | 0.033 | 1.197 | normal |



|       |          |          |        |       |        |
|-------|----------|----------|--------|-------|--------|
| chr04 | 29900001 | 30000000 | 0.025  | 1.353 | normal |
| chr16 | 1        | 100000   | 0.016  | 1.011 | normal |
| chr16 | 100001   | 200000   | -0.006 | 0.963 | normal |
| chr16 | 200001   | 300000   | 0.067  | 0.647 | normal |
| chr16 | 300001   | 400000   | 0.043  | 0.998 | normal |
| chr16 | 400001   | 500000   | 0.010  | 0.936 | normal |
| chr16 | 500001   | 600000   | 0.035  | 1.038 | normal |
| chr16 | 600001   | 700000   | 0.019  | 1.136 | normal |
| chr16 | 700001   | 800000   | 0.039  | 1.072 | normal |
| chr16 | 800001   | 900000   | 0.064  | 1.269 | normal |
| chr16 | 900001   | 1000000  | 0.051  | 1.128 | normal |
| chr16 | 1000001  | 1100000  | 0.073  | 0.847 | normal |
| chr16 | 1100001  | 1200000  | 0.042  | 1.046 | normal |
| chr16 | 1200001  | 1300000  | 0.050  | 1.128 | normal |
| chr16 | 1300001  | 1400000  | 0.024  | 0.927 | normal |
| chr16 | 1400001  | 1500000  | 0.013  | 1.027 | normal |
| chr16 | 1500001  | 1600000  | 0.007  | 1.237 | normal |
| chr16 | 1600001  | 1700000  | 0.006  | 1.070 | normal |
| chr16 | 1700001  | 1800000  | 0.001  | 1.132 | normal |
| chr16 | 1800001  | 1900000  | 0.046  | 1.209 | normal |
| chr16 | 1900001  | 2000000  | 0.066  | 1.283 | normal |
| chr16 | 2000001  | 2100000  | 0.065  | 1.349 | normal |
| chr16 | 2100001  | 2200000  | 0.043  | 1.351 | normal |
| chr16 | 2200001  | 2300000  | 0.068  | 1.047 | normal |
| chr16 | 2300001  | 2400000  | 0.070  | 1.000 | normal |
| chr16 | 2400001  | 2500000  | 0.045  | 1.036 | normal |
| chr16 | 2500001  | 2600000  | 0.051  | 0.887 | normal |
| chr16 | 2600001  | 2700000  | 0.044  | 1.027 | normal |
| chr16 | 2700001  | 2800000  | 0.038  | 1.020 | normal |
| chr16 | 2800001  | 2900000  | 0.036  | 1.002 | normal |
| chr16 | 2900001  | 3000000  | 0.085  | 0.849 | normal |
| chr16 | 3000001  | 3100000  | 0.060  | 0.862 | normal |
| chr16 | 3100001  | 3200000  | 0.047  | 0.992 | normal |
| chr16 | 3200001  | 3300000  | 0.070  | 0.915 | normal |
| chr16 | 3300001  | 3400000  | 0.033  | 1.449 | normal |
| chr16 | 3400001  | 3500000  | 0.081  | 1.643 | normal |
| chr16 | 3500001  | 3600000  | 0.054  | 0.741 | normal |
| chr16 | 3600001  | 3700000  | 0.093  | 0.844 | normal |
| chr16 | 3700001  | 3800000  | 0.058  | 0.716 | normal |
| chr16 | 3800001  | 3900000  | 0.031  | 0.960 | normal |
| chr16 | 3900001  | 4000000  | 0.043  | 0.958 | normal |
| chr16 | 4000001  | 4100000  | 0.057  | 1.178 | normal |
| chr16 | 4100001  | 4200000  | 0.059  | 0.986 | normal |
| chr16 | 4200001  | 4300000  | 0.065  | 0.936 | normal |

|       |         |         |       |       |        |
|-------|---------|---------|-------|-------|--------|
| chr16 | 4300001 | 4400000 | 0.079 | 0.915 | normal |
| chr16 | 4400001 | 4500000 | 0.062 | 0.825 | normal |
| chr16 | 4500001 | 4600000 | 0.041 | 0.987 | normal |
| chr16 | 4600001 | 4700000 | 0.049 | 1.285 | normal |
| chr16 | 4700001 | 4800000 | 0.063 | 0.983 | normal |
| chr16 | 4800001 | 4900000 | 0.030 | 1.036 | normal |
| chr16 | 4900001 | 5000000 | 0.012 | 1.027 | normal |
| chr16 | 5000001 | 5100000 | 0.037 | 1.097 | normal |
| chr16 | 5100001 | 5200000 | 0.050 | 1.044 | normal |
| chr16 | 5200001 | 5300000 | 0.053 | 0.922 | normal |
| chr16 | 5300001 | 5400000 | 0.037 | 0.923 | normal |
| chr16 | 5400001 | 5500000 | 0.017 | 0.985 | normal |
| chr16 | 5500001 | 5600000 | 0.020 | 0.948 | normal |
| chr16 | 5600001 | 5700000 | 0.077 | 0.908 | normal |
| chr16 | 5700001 | 5800000 | 0.131 | 0.863 | normal |
| chr16 | 5800001 | 5900000 | 0.054 | 1.120 | normal |
| chr16 | 5900001 | 6000000 | 0.027 | 1.034 | normal |
| chr16 | 6000001 | 6100000 | 0.035 | 0.966 | normal |
| chr16 | 6100001 | 6200000 | 0.041 | 0.883 | normal |
| chr16 | 6200001 | 6300000 | 0.069 | 1.075 | normal |
| chr16 | 6300001 | 6400000 | 0.075 | 1.169 | normal |
| chr16 | 6400001 | 6500000 | 0.047 | 1.101 | normal |
| chr16 | 6500001 | 6600000 | 0.044 | 1.044 | normal |
| chr16 | 6600001 | 6700000 | 0.046 | 1.089 | normal |
| chr16 | 6700001 | 6800000 | 0.057 | 0.987 | normal |
| chr16 | 6800001 | 6900000 | 0.075 | 1.035 | normal |
| chr16 | 6900001 | 7000000 | 0.061 | 1.126 | normal |
| chr16 | 7000001 | 7100000 | 0.051 | 1.127 | normal |
| chr16 | 7100001 | 7200000 | 0.050 | 1.069 | normal |
| chr16 | 7200001 | 7300000 | 0.067 | 1.436 | normal |
| chr16 | 7300001 | 7400000 | 0.078 | 0.698 | normal |
| chr16 | 7400001 | 7500000 | 0.087 | 0.636 | normal |
| chr16 | 7500001 | 7600000 | 0.018 | 0.991 | normal |
| chr16 | 7600001 | 7700000 | 0.058 | 1.011 | normal |
| chr16 | 7700001 | 7800000 | 0.040 | 1.033 | normal |
| chr16 | 7800001 | 7900000 | 0.029 | 1.169 | normal |
| chr16 | 7900001 | 8000000 | 0.049 | 1.014 | normal |
| chr16 | 8000001 | 8100000 | 0.119 | 0.925 | normal |
| chr16 | 8100001 | 8200000 | 0.069 | 1.113 | normal |
| chr16 | 8200001 | 8300000 | 0.090 | 1.487 | normal |
| chr16 | 8300001 | 8400000 | 0.046 | 1.114 | normal |
| chr16 | 8400001 | 8500000 | 0.077 | 1.218 | normal |
| chr16 | 8500001 | 8600000 | 0.089 | 1.103 | normal |
| chr16 | 8600001 | 8700000 | 0.075 | 0.911 | normal |

|       |          |          |       |       |        |
|-------|----------|----------|-------|-------|--------|
| chr16 | 8700001  | 8800000  | 0.079 | 1.009 | normal |
| chr16 | 8800001  | 8900000  | 0.068 | 1.172 | normal |
| chr16 | 8900001  | 9000000  | 0.063 | 0.855 | normal |
| chr16 | 9000001  | 9100000  | 0.059 | 0.902 | normal |
| chr16 | 9100001  | 9200000  | 0.046 | 1.195 | normal |
| chr16 | 9200001  | 9300000  | 0.060 | 1.216 | normal |
| chr16 | 9300001  | 9400000  | 0.103 | 1.224 | normal |
| chr16 | 9400001  | 9500000  | 0.088 | 0.802 | normal |
| chr16 | 9500001  | 9600000  | 0.094 | 0.765 | normal |
| chr16 | 9600001  | 9700000  | 0.101 | 0.628 | normal |
| chr16 | 9700001  | 9800000  | 0.071 | 0.827 | normal |
| chr16 | 9800001  | 9900000  | 0.047 | 0.991 | normal |
| chr16 | 9900001  | 10000000 | 0.080 | 1.053 | normal |
| chr16 | 10000001 | 10100000 | 0.118 | 1.102 | normal |
| chr16 | 10100001 | 10200000 | 0.038 | 1.126 | normal |
| chr16 | 10200001 | 10300000 | 0.047 | 1.117 | normal |
| chr16 | 10300001 | 10400000 | 0.137 | 2.200 | normal |
| chr16 | 10400001 | 10500000 | 0.069 | 1.153 | normal |
| chr16 | 10500001 | 10600000 | 0.046 | 0.983 | normal |
| chr16 | 10600001 | 10700000 | 0.156 | 1.336 | normal |
| chr16 | 10700001 | 10800000 | 0.055 | 0.982 | normal |
| chr16 | 10800001 | 10900000 | 0.032 | 1.319 | normal |
| chr16 | 10900001 | 11000000 | 0.042 | 1.253 | normal |
| chr16 | 11000001 | 11100000 | 0.011 | 1.252 | normal |
| chr16 | 11100001 | 11200000 | 0.014 | 1.052 | normal |
| chr16 | 11200001 | 11300000 | 0.031 | 1.253 | normal |
| chr16 | 11300001 | 11400000 | 0.044 | 1.041 | normal |
| chr16 | 11400001 | 11500000 | 0.025 | 1.157 | normal |
| chr16 | 11500001 | 11600000 | 0.026 | 1.009 | normal |
| chr16 | 11600001 | 11700000 | 0.027 | 0.978 | normal |
| chr16 | 11700001 | 11800000 | 0.151 | 0.894 | normal |
| chr16 | 11800001 | 11900000 | 0.072 | 1.666 | normal |
| chr16 | 11900001 | 12000000 | 0.100 | 0.861 | normal |
| chr16 | 12000001 | 12100000 | 0.022 | 1.215 | normal |
| chr16 | 12100001 | 12200000 | 0.059 | 0.727 | normal |
| chr16 | 12200001 | 12300000 | 0.058 | 0.885 | normal |
| chr16 | 12300001 | 12400000 | 0.053 | 0.982 | normal |
| chr16 | 12400001 | 12500000 | 0.070 | 0.806 | normal |
| chr16 | 12500001 | 12600000 | 0.017 | 1.585 | normal |
| chr16 | 12600001 | 12700000 | 0.080 | 0.973 | normal |
| chr16 | 12700001 | 12800000 | 0.077 | 1.187 | normal |
| chr16 | 12800001 | 12900000 | 0.030 | 0.999 | normal |
| chr16 | 12900001 | 13000000 | 0.092 | 2.411 | normal |
| chr16 | 13000001 | 13100000 | 0.095 | 2.437 | normal |

|       |          |          |       |       |        |
|-------|----------|----------|-------|-------|--------|
| chr16 | 13100001 | 13200000 | 0.060 | 1.409 | normal |
| chr16 | 13200001 | 13300000 | 0.069 | 2.039 | normal |
| chr16 | 13300001 | 13400000 | 0.100 | 1.041 | normal |
| chr16 | 13400001 | 13500000 | 0.109 | 0.764 | normal |
| chr16 | 13500001 | 13600000 | 0.104 | 1.018 | normal |
| chr16 | 13600001 | 13700000 | 0.075 | 0.850 | normal |
| chr16 | 13700001 | 13800000 | 0.052 | 1.062 | normal |
| chr16 | 13800001 | 13900000 | 0.062 | 1.130 | normal |
| chr16 | 13900001 | 14000000 | 0.036 | 1.135 | normal |
| chr16 | 14000001 | 14100000 | 0.075 | 1.209 | normal |
| chr16 | 14100001 | 14200000 | 0.047 | 0.947 | normal |
| chr16 | 14200001 | 14300000 | 0.081 | 0.574 | normal |
| chr16 | 14300001 | 14400000 | 0.041 | 0.760 | normal |
| chr16 | 14400001 | 14500000 | 0.077 | 0.886 | normal |
| chr16 | 14500001 | 14600000 | 0.070 | 0.830 | normal |
| chr16 | 14600001 | 14700000 | 0.056 | 1.038 | normal |
| chr16 | 14700001 | 14800000 | 0.085 | 0.699 | normal |
| chr16 | 14800001 | 14900000 | 0.093 | 0.794 | normal |
| chr16 | 14900001 | 15000000 | 0.053 | 1.387 | normal |
| chr16 | 15000001 | 15100000 | 0.113 | 1.175 | normal |
| chr16 | 15100001 | 15200000 | 0.079 | 1.064 | normal |
| chr16 | 15200001 | 15300000 | 0.055 | 1.130 | normal |
| chr16 | 15300001 | 15400000 | 0.071 | 1.110 | normal |
| chr16 | 15400001 | 15500000 | 0.031 | 0.996 | normal |
| chr16 | 15500001 | 15600000 | 0.039 | 0.951 | normal |
| chr16 | 15600001 | 15700000 | 0.033 | 0.943 | normal |
| chr16 | 15700001 | 15800000 | 0.038 | 0.979 | normal |
| chr16 | 15800001 | 15900000 | 0.042 | 0.886 | normal |
| chr16 | 15900001 | 16000000 | 0.031 | 0.946 | normal |
| chr16 | 16000001 | 16100000 | 0.075 | 1.055 | normal |
| chr16 | 16100001 | 16200000 | 0.060 | 1.089 | normal |
| chr16 | 16200001 | 16300000 | 0.071 | 0.907 | normal |
| chr16 | 16300001 | 16400000 | 0.090 | 0.821 | normal |
| chr16 | 16400001 | 16500000 | 0.013 | 1.037 | normal |
| chr16 | 16500001 | 16600000 | 0.024 | 0.650 | normal |
| chr16 | 16600001 | 16700000 | 0.065 | 1.034 | normal |
| chr16 | 16700001 | 16800000 | 0.055 | 0.823 | normal |
| chr16 | 16800001 | 16900000 | 0.058 | 1.181 | normal |
| chr16 | 16900001 | 17000000 | 0.111 | 0.871 | normal |
| chr16 | 17000001 | 17100000 | 0.084 | 1.016 | normal |
| chr16 | 17100001 | 17200000 | 0.064 | 1.150 | normal |
| chr16 | 17200001 | 17300000 | 0.096 | 1.633 | normal |
| chr16 | 17300001 | 17400000 | 0.050 | 1.390 | normal |
| chr16 | 17400001 | 17500000 | 0.060 | 1.339 | normal |

|       |          |          |       |       |        |
|-------|----------|----------|-------|-------|--------|
| chr16 | 17500001 | 17600000 | 0.121 | 1.265 | normal |
| chr16 | 17600001 | 17700000 | 0.057 | 1.185 | normal |
| chr16 | 17700001 | 17800000 | 0.050 | 1.235 | normal |
| chr16 | 17800001 | 17900000 | 0.106 | 0.955 | normal |
| chr16 | 17900001 | 18000000 | 0.099 | 1.246 | normal |
| chr16 | 18000001 | 18100000 | 0.066 | 1.464 | normal |
| chr16 | 18100001 | 18200000 | 0.071 | 1.078 | normal |
| chr16 | 18200001 | 18300000 | 0.062 | 1.059 | normal |
| chr16 | 18300001 | 18400000 | 0.064 | 1.185 | normal |
| chr16 | 18400001 | 18500000 | 0.053 | 1.053 | normal |
| chr16 | 18500001 | 18600000 | 0.073 | 0.859 | normal |
| chr16 | 18600001 | 18700000 | 0.084 | 0.801 | normal |
| chr16 | 18700001 | 18800000 | 0.098 | 0.685 | normal |
| chr16 | 18800001 | 18900000 | 0.093 | 0.926 | normal |
| chr16 | 18900001 | 19000000 | 0.074 | 0.815 | normal |
| chr16 | 19000001 | 19100000 | 0.126 | 1.373 | normal |
| chr16 | 19100001 | 19200000 | 0.033 | 1.003 | normal |
| chr16 | 19200001 | 19300000 | 0.056 | 0.924 | normal |
| chr16 | 19300001 | 19400000 | 0.147 | 1.020 | normal |
| chr16 | 19400001 | 19500000 | 0.083 | 0.816 | normal |
| chr16 | 19500001 | 19600000 | 0.103 | 1.030 | normal |
| chr16 | 19600001 | 19700000 | 0.064 | 1.017 | normal |
| chr16 | 19700001 | 19800000 | 0.071 | 0.845 | normal |
| chr16 | 19800001 | 19900000 | 0.165 | 1.425 | normal |
| chr16 | 19900001 | 20000000 | 0.053 | 0.862 | normal |
| chr16 | 20000001 | 20100000 | 0.038 | 0.956 | normal |
| chr16 | 20100001 | 20200000 | 0.039 | 1.003 | normal |
| chr16 | 20200001 | 20300000 | 0.028 | 0.983 | normal |
| chr16 | 20300001 | 20400000 | 0.033 | 0.857 | normal |
| chr16 | 20400001 | 20500000 | 0.063 | 0.843 | normal |
| chr16 | 20500001 | 20600000 | 0.071 | 1.029 | normal |
| chr16 | 20600001 | 20700000 | 0.063 | 0.880 | normal |
| chr16 | 20700001 | 20800000 | 0.093 | 1.238 | normal |
| chr16 | 20800001 | 20900000 | 0.107 | 0.946 | normal |
| chr16 | 20900001 | 21000000 | 0.039 | 0.990 | normal |
| chr16 | 21000001 | 21100000 | 0.036 | 1.200 | normal |
| chr16 | 21100001 | 21200000 | 0.039 | 0.921 | normal |
| chr16 | 21200001 | 21300000 | 0.078 | 1.058 | normal |
| chr16 | 21300001 | 21400000 | 0.068 | 1.003 | normal |
| chr16 | 21400001 | 21500000 | 0.067 | 0.991 | normal |
| chr16 | 21500001 | 21600000 | 0.110 | 1.643 | normal |
| chr16 | 21600001 | 21700000 | 0.068 | 0.952 | normal |
| chr16 | 21700001 | 21800000 | 0.067 | 1.130 | normal |
| chr16 | 21800001 | 21900000 | 0.094 | 1.036 | normal |

|       |          |          |       |       |        |
|-------|----------|----------|-------|-------|--------|
| chr16 | 21900001 | 22000000 | 0.057 | 0.961 | normal |
| chr16 | 22000001 | 22100000 | 0.104 | 0.633 | normal |
| chr16 | 22100001 | 22200000 | 0.108 | 0.715 | normal |
| chr16 | 22200001 | 22300000 | 0.087 | 0.786 | normal |
| chr16 | 22300001 | 22400000 | 0.065 | 0.863 | normal |
| chr16 | 22400001 | 22500000 | 0.016 | 0.898 | normal |
| chr16 | 22500001 | 22600000 | 0.024 | 0.864 | normal |
| chr16 | 22600001 | 22700000 | 0.049 | 0.910 | normal |
| chr16 | 22700001 | 22800000 | 0.044 | 1.048 | normal |
| chr16 | 22800001 | 22900000 | 0.131 | 0.767 | normal |
| chr16 | 22900001 | 23000000 | 0.143 | 0.788 | normal |
| chr16 | 23000001 | 23100000 | 0.107 | 1.113 | normal |
| chr16 | 23100001 | 23200000 | 0.046 | 1.001 | normal |
| chr16 | 23200001 | 23300000 | 0.059 | 0.887 | normal |
| chr16 | 23300001 | 23400000 | 0.123 | 0.496 | normal |
| chr16 | 23400001 | 23500000 | 0.141 | 1.262 | normal |
| chr16 | 23500001 | 23600000 | 0.065 | 1.268 | normal |
| chr16 | 23600001 | 23700000 | 0.091 | 1.283 | normal |
| chr16 | 23700001 | 23800000 | 0.084 | 1.737 | normal |
| chr16 | 23800001 | 23900000 | 0.010 | 1.035 | normal |
| chr16 | 23900001 | 24000000 | 0.061 | 0.920 | normal |
| chr16 | 24000001 | 24100000 | 0.063 | 0.893 | normal |
| chr16 | 24100001 | 24200000 | 0.034 | 0.982 | normal |
| chr16 | 24200001 | 24300000 | 0.059 | 0.922 | normal |
| chr16 | 24300001 | 24400000 | 0.061 | 1.200 | normal |
| chr16 | 24400001 | 24500000 | 0.064 | 1.226 | normal |
| chr16 | 24500001 | 24600000 | 0.076 | 1.326 | normal |
| chr16 | 24600001 | 24700000 | 0.074 | 1.410 | normal |
| chr16 | 24700001 | 24800000 | 0.108 | 0.650 | normal |
| chr16 | 24800001 | 24900000 | 0.049 | 0.939 | normal |
| chr16 | 24900001 | 25000000 | 0.063 | 0.833 | normal |
| chr16 | 25000001 | 25100000 | 0.059 | 0.933 | normal |
| chr16 | 25100001 | 25200000 | 0.067 | 0.861 | normal |
| chr16 | 25200001 | 25300000 | 0.031 | 0.971 | normal |
| chr05 | 1        | 100000   | 0.019 | 0.969 | normal |
| chr05 | 100001   | 200000   | 0.036 | 1.056 | normal |
| chr05 | 200001   | 300000   | 0.015 | 1.074 | normal |
| chr05 | 300001   | 400000   | 0.066 | 0.945 | normal |
| chr05 | 400001   | 500000   | 0.087 | 0.974 | normal |
| chr05 | 500001   | 600000   | 0.072 | 1.198 | normal |
| chr05 | 600001   | 700000   | 0.060 | 0.828 | normal |
| chr05 | 700001   | 800000   | 0.071 | 1.099 | normal |
| chr05 | 800001   | 900000   | 0.056 | 1.106 | normal |
| chr05 | 900001   | 1000000  | 0.032 | 0.886 | normal |

|       |         |         |       |       |        |
|-------|---------|---------|-------|-------|--------|
| chr05 | 1000001 | 1100000 | 0.044 | 0.920 | normal |
| chr05 | 1100001 | 1200000 | 0.058 | 0.861 | normal |
| chr05 | 1200001 | 1300000 | 0.049 | 0.948 | normal |
| chr05 | 1300001 | 1400000 | 0.065 | 0.955 | normal |
| chr05 | 1400001 | 1500000 | 0.034 | 0.989 | normal |
| chr05 | 1500001 | 1600000 | 0.029 | 1.047 | normal |
| chr05 | 1600001 | 1700000 | 0.027 | 0.892 | normal |
| chr05 | 1700001 | 1800000 | 0.023 | 1.202 | normal |
| chr05 | 1800001 | 1900000 | 0.037 | 0.979 | normal |
| chr05 | 1900001 | 2000000 | 0.072 | 1.010 | normal |
| chr05 | 2000001 | 2100000 | 0.028 | 1.047 | normal |
| chr05 | 2100001 | 2200000 | 0.033 | 1.331 | normal |
| chr05 | 2200001 | 2300000 | 0.030 | 0.919 | normal |
| chr05 | 2300001 | 2400000 | 0.027 | 1.040 | normal |
| chr05 | 2400001 | 2500000 | 0.044 | 0.882 | normal |
| chr05 | 2500001 | 2600000 | 0.069 | 0.933 | normal |
| chr05 | 2600001 | 2700000 | 0.035 | 0.941 | normal |
| chr05 | 2700001 | 2800000 | 0.022 | 1.001 | normal |
| chr05 | 2800001 | 2900000 | 0.053 | 0.969 | normal |
| chr05 | 2900001 | 3000000 | 0.048 | 0.867 | normal |
| chr05 | 3000001 | 3100000 | 0.066 | 1.137 | normal |
| chr05 | 3100001 | 3200000 | 0.100 | 0.702 | normal |
| chr05 | 3200001 | 3300000 | 0.030 | 1.122 | normal |
| chr05 | 3300001 | 3400000 | 0.050 | 1.010 | normal |
| chr05 | 3400001 | 3500000 | 0.082 | 0.750 | normal |
| chr05 | 3500001 | 3600000 | 0.054 | 1.033 | normal |
| chr05 | 3600001 | 3700000 | 0.096 | 1.064 | normal |
| chr05 | 3700001 | 3800000 | 0.055 | 0.927 | normal |
| chr05 | 3800001 | 3900000 | 0.068 | 0.744 | normal |
| chr05 | 3900001 | 4000000 | 0.055 | 0.947 | normal |
| chr05 | 4000001 | 4100000 | 0.041 | 0.896 | normal |
| chr05 | 4100001 | 4200000 | 0.072 | 1.113 | normal |
| chr05 | 4200001 | 4300000 | 0.060 | 0.975 | normal |
| chr05 | 4300001 | 4400000 | 0.050 | 0.943 | normal |
| chr05 | 4400001 | 4500000 | 0.027 | 0.982 | normal |
| chr05 | 4500001 | 4600000 | 0.033 | 1.027 | normal |
| chr05 | 4600001 | 4700000 | 0.042 | 1.008 | normal |
| chr05 | 4700001 | 4800000 | 0.022 | 0.969 | normal |
| chr05 | 4800001 | 4900000 | 0.052 | 0.829 | normal |
| chr05 | 4900001 | 5000000 | 0.035 | 0.970 | normal |
| chr05 | 5000001 | 5100000 | 0.055 | 0.844 | normal |
| chr05 | 5100001 | 5200000 | 0.048 | 0.663 | normal |
| chr05 | 5200001 | 5300000 | 0.023 | 0.887 | normal |
| chr05 | 5300001 | 5400000 | 0.066 | 1.045 | normal |

|       |         |         |       |       |        |
|-------|---------|---------|-------|-------|--------|
| chr05 | 5400001 | 5500000 | 0.049 | 1.189 | normal |
| chr05 | 5500001 | 5600000 | 0.042 | 1.080 | normal |
| chr05 | 5600001 | 5700000 | 0.031 | 1.029 | normal |
| chr05 | 5700001 | 5800000 | 0.041 | 1.304 | normal |
| chr05 | 5800001 | 5900000 | 0.052 | 1.149 | normal |
| chr05 | 5900001 | 6000000 | 0.118 | 1.192 | normal |
| chr05 | 6000001 | 6100000 | 0.104 | 1.108 | normal |
| chr05 | 6100001 | 6200000 | 0.113 | 1.142 | normal |
| chr05 | 6200001 | 6300000 | 0.098 | 0.804 | normal |
| chr05 | 6300001 | 6400000 | 0.074 | 1.084 | normal |
| chr05 | 6400001 | 6500000 | 0.138 | 0.914 | normal |
| chr05 | 6500001 | 6600000 | 0.121 | 0.805 | normal |
| chr05 | 6600001 | 6700000 | 0.118 | 0.811 | normal |
| chr05 | 6700001 | 6800000 | 0.060 | 1.098 | normal |
| chr05 | 6800001 | 6900000 | 0.164 | 0.833 | normal |
| chr05 | 6900001 | 7000000 | 0.097 | 1.227 | normal |
| chr05 | 7000001 | 7100000 | 0.141 | 1.291 | normal |
| chr05 | 7100001 | 7200000 | 0.113 | 1.216 | normal |
| chr05 | 7200001 | 7300000 | 0.082 | 1.205 | normal |
| chr05 | 7300001 | 7400000 | 0.090 | 1.084 | normal |
| chr05 | 7400001 | 7500000 | 0.140 | 0.701 | normal |
| chr05 | 7500001 | 7600000 | 0.102 | 1.205 | normal |
| chr05 | 7600001 | 7700000 | 0.126 | 0.868 | normal |
| chr05 | 7700001 | 7800000 | 0.077 | 0.978 | normal |
| chr05 | 7800001 | 7900000 | 0.085 | 0.932 | normal |
| chr05 | 7900001 | 8000000 | 0.113 | 0.924 | normal |
| chr05 | 8000001 | 8100000 | 0.227 | 0.589 | normal |
| chr05 | 8100001 | 8200000 | 0.114 | 0.838 | normal |
| chr05 | 8200001 | 8300000 | 0.076 | 0.906 | normal |
| chr05 | 8300001 | 8400000 | 0.096 | 0.970 | normal |
| chr05 | 8400001 | 8500000 | 0.071 | 1.098 | normal |
| chr05 | 8500001 | 8600000 | 0.119 | 0.770 | normal |
| chr05 | 8600001 | 8700000 | 0.069 | 0.907 | normal |
| chr05 | 8700001 | 8800000 | 0.087 | 0.984 | normal |
| chr05 | 8800001 | 8900000 | 0.074 | 1.021 | normal |
| chr05 | 8900001 | 9000000 | 0.099 | 0.981 | normal |
| chr05 | 9000001 | 9100000 | 0.100 | 0.987 | normal |
| chr05 | 9100001 | 9200000 | 0.088 | 0.974 | normal |
| chr05 | 9200001 | 9300000 | 0.083 | 1.093 | normal |
| chr05 | 9300001 | 9400000 | 0.056 | 0.927 | normal |
| chr05 | 9400001 | 9500000 | 0.146 | 0.646 | normal |
| chr05 | 9500001 | 9600000 | 0.079 | 1.278 | normal |
| chr05 | 9600001 | 9700000 | 0.073 | 1.113 | normal |
| chr05 | 9700001 | 9800000 | 0.111 | 0.985 | normal |



|       |          |          |       |       |        |
|-------|----------|----------|-------|-------|--------|
| chr05 | 9800001  | 9900000  | 0.059 | 1.091 | normal |
| chr05 | 9900001  | 10000000 | 0.195 | 0.598 | normal |
| chr05 | 10000001 | 10100000 | 0.089 | 0.982 | normal |
| chr05 | 10100001 | 10200000 | 0.058 | 1.021 | normal |
| chr05 | 10200001 | 10300000 | 0.049 | 1.179 | normal |
| chr05 | 10300001 | 10400000 | 0.077 | 0.912 | normal |
| chr05 | 10400001 | 10500000 | 0.079 | 1.026 | normal |
| chr05 | 10500001 | 10600000 | 0.067 | 1.008 | normal |
| chr05 | 10600001 | 10700000 | 0.055 | 1.081 | normal |
| chr05 | 10700001 | 10800000 | 0.104 | 0.920 | normal |
| chr05 | 10800001 | 10900000 | 0.111 | 0.795 | normal |
| chr05 | 10900001 | 11000000 | 0.136 | 0.887 | normal |
| chr05 | 11000001 | 11100000 | 0.054 | 1.013 | normal |
| chr05 | 11100001 | 11200000 | 0.059 | 1.078 | normal |
| chr05 | 11200001 | 11300000 | 0.060 | 0.842 | normal |
| chr05 | 11300001 | 11400000 | 0.063 | 0.967 | normal |
| chr05 | 11400001 | 11500000 | 0.056 | 0.878 | normal |
| chr05 | 11500001 | 11600000 | 0.050 | 1.084 | normal |
| chr05 | 11600001 | 11700000 | 0.077 | 0.985 | normal |
| chr05 | 11700001 | 11800000 | 0.089 | 0.693 | normal |
| chr05 | 11800001 | 11900000 | 0.072 | 0.834 | normal |
| chr05 | 11900001 | 12000000 | 0.049 | 1.082 | normal |
| chr05 | 12000001 | 12100000 | 0.180 | 0.778 | normal |
| chr05 | 12100001 | 12200000 | 0.144 | 0.892 | normal |
| chr05 | 12200001 | 12300000 | 0.081 | 0.984 | normal |
| chr05 | 12300001 | 12400000 | 0.134 | 0.641 | normal |
| chr05 | 12400001 | 12500000 | 0.151 | 0.726 | normal |
| chr05 | 12500001 | 12600000 | 0.117 | 0.781 | normal |
| chr05 | 12600001 | 12700000 | 0.077 | 1.039 | normal |
| chr05 | 12700001 | 12800000 | 0.097 | 0.845 | normal |
| chr05 | 12800001 | 12900000 | 0.030 | 1.052 | normal |
| chr05 | 12900001 | 13000000 | 0.051 | 1.147 | normal |
| chr05 | 13000001 | 13100000 | 0.064 | 1.066 | normal |
| chr05 | 13100001 | 13200000 | 0.107 | 0.865 | normal |
| chr05 | 13200001 | 13300000 | 0.073 | 1.051 | normal |
| chr05 | 13300001 | 13400000 | 0.054 | 1.027 | normal |
| chr05 | 13400001 | 13500000 | 0.085 | 0.902 | normal |
| chr05 | 13500001 | 13600000 | 0.077 | 1.105 | normal |
| chr05 | 13600001 | 13700000 | 0.086 | 0.968 | normal |
| chr05 | 13700001 | 13800000 | 0.048 | 1.164 | normal |
| chr05 | 13800001 | 13900000 | 0.038 | 1.009 | normal |
| chr05 | 13900001 | 14000000 | 0.044 | 0.919 | normal |
| chr05 | 14000001 | 14100000 | 0.075 | 1.398 | normal |
| chr05 | 14100001 | 14200000 | 0.100 | 2.104 | normal |

|       |          |          |       |       |        |
|-------|----------|----------|-------|-------|--------|
| chr05 | 14200001 | 14300000 | 0.062 | 1.995 | normal |
| chr05 | 14300001 | 14400000 | 0.066 | 2.493 | normal |
| chr05 | 14400001 | 14500000 | 0.079 | 1.104 | normal |
| chr05 | 14500001 | 14600000 | 0.101 | 0.904 | normal |
| chr05 | 14600001 | 14700000 | 0.045 | 1.017 | normal |
| chr05 | 14700001 | 14800000 | 0.081 | 1.357 | normal |
| chr05 | 14800001 | 14900000 | 0.047 | 1.116 | normal |
| chr05 | 14900001 | 15000000 | 0.066 | 1.158 | normal |
| chr05 | 15000001 | 15100000 | 0.062 | 1.354 | normal |
| chr05 | 15100001 | 15200000 | 0.060 | 0.992 | normal |
| chr05 | 15200001 | 15300000 | 0.086 | 0.937 | normal |
| chr05 | 15300001 | 15400000 | 0.072 | 0.980 | normal |
| chr05 | 15400001 | 15500000 | 0.024 | 0.991 | normal |
| chr05 | 15500001 | 15600000 | 0.069 | 1.239 | normal |
| chr05 | 15600001 | 15700000 | 0.059 | 1.017 | normal |
| chr05 | 15700001 | 15800000 | 0.073 | 1.021 | normal |
| chr05 | 15800001 | 15900000 | 0.163 | 1.886 | sig    |
| chr05 | 15900001 | 16000000 | 0.161 | 1.831 | sig    |
| chr05 | 16000001 | 16100000 | 0.149 | 1.563 | normal |
| chr05 | 16100001 | 16200000 | 0.168 | 2.100 | sig    |
| chr05 | 16200001 | 16300000 | 0.174 | 1.976 | sig    |
| chr05 | 16300001 | 16400000 | 0.112 | 1.277 | normal |
| chr05 | 16400001 | 16500000 | 0.172 | 1.986 | sig    |
| chr05 | 16500001 | 16600000 | 0.098 | 1.534 | normal |
| chr05 | 16600001 | 16700000 | 0.025 | 1.006 | normal |
| chr05 | 16700001 | 16800000 | 0.035 | 1.353 | normal |
| chr05 | 16800001 | 16900000 | 0.017 | 0.978 | normal |
| chr05 | 16900001 | 17000000 | 0.027 | 1.048 | normal |
| chr05 | 17000001 | 17100000 | 0.039 | 0.880 | normal |
| chr05 | 17100001 | 17200000 | 0.023 | 1.031 | normal |
| chr05 | 17200001 | 17300000 | 0.049 | 1.524 | normal |
| chr05 | 17300001 | 17400000 | 0.063 | 1.307 | normal |
| chr05 | 17400001 | 17500000 | 0.076 | 0.730 | normal |
| chr05 | 17500001 | 17600000 | 0.054 | 0.856 | normal |
| chr05 | 17600001 | 17700000 | 0.051 | 1.703 | normal |
| chr05 | 17700001 | 17800000 | 0.063 | 1.631 | normal |
| chr05 | 17800001 | 17900000 | 0.063 | 1.039 | normal |
| chr05 | 17900001 | 18000000 | 0.059 | 1.244 | normal |
| chr05 | 18000001 | 18100000 | 0.063 | 1.283 | normal |
| chr05 | 18100001 | 18200000 | 0.075 | 0.993 | normal |
| chr05 | 18200001 | 18300000 | 0.149 | 0.472 | normal |
| chr05 | 18300001 | 18400000 | 0.076 | 0.815 | normal |
| chr05 | 18400001 | 18500000 | 0.038 | 1.202 | normal |
| chr05 | 18500001 | 18600000 | 0.053 | 1.213 | normal |

|                     |          |          |       |       |        |
|---------------------|----------|----------|-------|-------|--------|
| chr05               | 18600001 | 18700000 | 0.115 | 0.571 | normal |
| chr05               | 18700001 | 18800000 | 0.126 | 0.582 | normal |
| chr05               | 18800001 | 18900000 | 0.060 | 1.026 | normal |
| chr05               | 18900001 | 19000000 | 0.034 | 1.022 | normal |
| chr05               | 19000001 | 19100000 | 0.056 | 0.968 | normal |
| chr05               | 19100001 | 19200000 | 0.079 | 1.001 | normal |
| chr05               | 19200001 | 19300000 | 0.048 | 0.904 | normal |
| chr05               | 19300001 | 19400000 | 0.094 | 0.784 | normal |
| chr05               | 19400001 | 19500000 | 0.067 | 1.083 | normal |
| chr05               | 19500001 | 19600000 | 0.206 | 0.479 | normal |
| chr05               | 19600001 | 19700000 | 0.093 | 0.801 | normal |
| chr05               | 19700001 | 19800000 | 0.103 | 0.780 | normal |
| chr05               | 19800001 | 19900000 | 0.199 | 0.346 | normal |
| chr05               | 19900001 | 20000000 | 0.054 | 0.940 | normal |
| chr05               | 20000001 | 20100000 | 0.146 | 0.638 | normal |
| chr05               | 20100001 | 20200000 | 0.091 | 1.063 | normal |
| chr05               | 20200001 | 20300000 | 0.063 | 0.894 | normal |
| chr05               | 20300001 | 20400000 | 0.056 | 0.932 | normal |
| chr05               | 20400001 | 20500000 | 0.080 | 0.873 | normal |
| chr05               | 20500001 | 20600000 | 0.032 | 1.001 | normal |
| chr05               | 20600001 | 20700000 | 0.018 | 0.982 | normal |
| chr05               | 20700001 | 20800000 | 0.032 | 1.119 | normal |
| chr05               | 20800001 | 20900000 | 0.033 | 1.124 | normal |
| Between populations |          |          | 0.075 | 1.061 |        |
