# Supplementary material for: Chromosome-scale assembly reveals asymmetric paleo-subgenome evolution and targets for the acceleration of fungal resistance breeding in the nut crop, pecan
Source: PubMed Central journal article supplement — Plant Commun. 2021 Sep 24;2(6):100247. doi: 10.1016/j.xplc.2021.100247 (PMC8577110; doi:10.1016/j.xplc.2021.100247), 2021-09-24
Supplement: mmc3.pdf [file mmc3.pdf]

Table S23. Information of candidate genes in the selected regions (Top 5% of *Fst* and  $\pi$  ratio).

| Chromosome | Start | End  | Gene ID      | Gene name | <i>Fst</i> | $\pi$ ratio | Swissprot                                                                                                                        | KEGG                                   | TrEMBL                                                                                                                       | Interpro                                                         | GO |
|------------|-------|------|--------------|-----------|------------|-------------|----------------------------------------------------------------------------------------------------------------------------------|----------------------------------------|------------------------------------------------------------------------------------------------------------------------------|------------------------------------------------------------------|----|
| chr01      | 1032  | 1032 | Cil_01G      | NA        |            |             | NA                                                                                                                               | NA                                     | NA                                                                                                                           | NA                                                               | NA |
|            | 3356  | 9651 | _00471V<br>2 |           |            |             |                                                                                                                                  |                                        |                                                                                                                              |                                                                  |    |
| chr01      | 1033  | 1034 | Cil_01G      | groE      | 0.202      | 1.537       | Q8W486/252/Y1<br>491_ARATH<br>Uncharacterized<br>protein<br>At1g04910<br>OS=Arabidopsis<br>thaliana<br>GN=At1g04910<br>PE=2 SV=1 | K04077/groEL,<br>chaperonin            | W9SH14/377/W9<br>SH14_9ROSA<br>Uncharacterized<br>protein<br>OS=Morus<br>notabilis<br>GN=L484_00496<br>9 PE=4 SV=1           | 1/1/IPR019378;<br>GDP-fucose<br>protein O-<br>fucosyltransferase | NA |
|            | 2020  | 8935 | _00472V<br>2 |           |            |             |                                                                                                                                  |                                        |                                                                                                                              |                                                                  |    |
| chr02      | 7100  | 7105 | Cil_02G      | OXR       | 0.185      | 1.885       | A8KBE0/869/OX<br>R1_XENTR<br>Oxidation<br>resistance protein<br>1 OS=Xenopus<br>tropicalis<br>GN=oxr1 PE=2<br>SV=2               | K20409/WDR5<br>9/repeat-<br>containing | A0A067LEN3/37<br>3/A0A067LEN3_<br>JATCU<br>Uncharacterized<br>protein<br>OS=Jatropha<br>curcas<br>GN=JCGZ_24046<br>PE=4 SV=1 | 1/1/IPR006571;<br>TLDC domain                                    | NA |
|            | 290   | 352  | _00494V<br>2 |           |            |             |                                                                                                                                  |                                        |                                                                                                                              |                                                                  |    |

|      |      |         |      |                 |                 |                     |
|------|------|---------|------|-----------------|-----------------|---------------------|
| 7107 | 7116 | Cil_02G | ASN  | Q9LFU1/578/AS   | W9QNB5/584/W    | GO:0004066;         |
| 050  | 378  | _00495V | S3/A | NS3_ARATH       | 9QNB5_9ROSA     | asparagine          |
|      |      | 2       | SNB  | Asparagine      | Glutamine-      | synthase            |
|      |      |         |      | synthetase      | dependent       | (glutamine-         |
|      |      |         |      | [glutamine-     | asparagine      | hydrolyzing)        |
|      |      |         |      | hydrolyzing] 3  | synthetase 2    | activity;           |
|      |      |         |      | OS=Arabidopsis  | OS=Morus        | function GO:00065   |
|      |      |         |      | thaliana        | notabilis       | 29; asparagine      |
|      |      |         |      | GN=ASN3 PE=2    | GN=L484_02211   | biosynthetic        |
|      |      |         |      | SV=1            | 5 PE=4 SV=1     | process; process    |
|      |      |         |      |                 |                 | GO:0000139;         |
|      |      |         |      |                 |                 | Golgi membrane;     |
|      |      |         |      |                 |                 | component GO:00     |
|      |      |         |      |                 |                 | 05351;              |
|      |      |         |      |                 |                 | sugar:proton        |
|      |      |         |      |                 |                 | symporter activity; |
|      |      |         |      |                 |                 | function GO:00086   |
|      |      |         |      |                 |                 | 43; carbohydrate    |
|      |      |         |      |                 |                 | transport;          |
|      |      |         |      |                 |                 | process GO:00160    |
|      |      |         |      |                 |                 | 21; integral        |
|      |      |         |      |                 |                 | component of        |
|      |      |         |      |                 |                 | membrane;           |
|      |      |         |      |                 |                 | component           |
| 7137 | 7147 | Cil_02G | CST  | Q8LES0/304/CST  | K7L6H4/307/K7   |                     |
| 608  | 647  | _00496V | R5   | R5_ARATH        | L6H4_SOYBN      |                     |
|      |      | 2       |      | CMP-sialic acid | Uncharacterized | 1/1/IPR007271;      |
|      |      |         |      | transporter 5   | protein         | Nucleotide-sugar    |
|      |      |         |      | OS=Arabidopsis  | OS=Glycine max  | transporter         |
|      |      |         |      | thaliana        | PE=4 SV=1       |                     |
|      |      |         |      | GN=At5g65000    |                 |                     |
|      |      |         |      | PE=2 SV=1       |                 |                     |

|      |      |                |                     |                                                                                                                                     |                          |                                                                                                                                                   |                                                                                                                 |    |                                                                                                                                                                                                                                                                              |
|------|------|----------------|---------------------|-------------------------------------------------------------------------------------------------------------------------------------|--------------------------|---------------------------------------------------------------------------------------------------------------------------------------------------|-----------------------------------------------------------------------------------------------------------------|----|------------------------------------------------------------------------------------------------------------------------------------------------------------------------------------------------------------------------------------------------------------------------------|
| 7156 | 7161 | Cil_02G_00497V | DOT3                | Q9LFU0/578/DO<br>T3_ARATH<br>BTB/POZ<br>domain-<br>containing protein<br>DOT3<br>OS=Arabidopsis<br>thaliana<br>GN=DOT3 PE=2<br>SV=1 | K03063/PSMC4<br>./26S    | W9QDN1/603/W<br>9QDN1_9ROSA<br>Putative<br>BTB/POZ<br>domain-<br>containing protein<br>DOT3 OS=Morus<br>notabilis<br>GN=L484_02211<br>7 PE=4 SV=1 | 1/1/IPR027356;<br>NPH3 domain                                                                                   | NA | GO:0005525; GTP<br>binding;<br>function GO:00056<br>22; intracellular;<br>component GO:00<br>07165; signal<br>transduction;<br>process GO:00072<br>64; small GTPase<br>mediated signal<br>transduction;<br>process GO:00150<br>31; protein<br>transport;<br>process GO:00160 |
| 7162 | 7167 | Cil_02G_00498V | RAH1E/R<br>AB6<br>A | Q9LFT9/207/RA<br>H1E_ARATH<br>Ras-related<br>protein RABH1e<br>OS=Arabidopsis<br>thaliana<br>GN=RABH1E<br>PE=2 SV=1                 | K07893/RAB6<br>A/protein | M5WJX4/206/M5<br>WJX4_PRUPE<br>Uncharacterized<br>protein<br>OS=Prunus<br>persica<br>GN=PRUPE_ppa<br>011539mg PE=3<br>SV=1                        | 4/IPR003579;<br>Small GTPase<br>superfamily, Rab<br>type/IPR020849;<br>Small GTPase<br>superfamily, Ras<br>type |    |                                                                                                                                                                                                                                                                              |



|      |      |              |     |    |                                                                                                                       |                                                                    |                                                                                                                                                                                              |                                                                   |    |
|------|------|--------------|-----|----|-----------------------------------------------------------------------------------------------------------------------|--------------------------------------------------------------------|----------------------------------------------------------------------------------------------------------------------------------------------------------------------------------------------|-------------------------------------------------------------------|----|
| 4137 | 4144 | Cil_03G      | TRM |    |                                                                                                                       | OS=Theobroma<br>cacao<br>GN=TCM_02689<br>3 PE=4 SV=1               |                                                                                                                                                                                              |                                                                   |    |
| 084  | 042  | _00290V<br>2 | 3   | NA | K15333/TRM3,<br>tRNA                                                                                                  | NA                                                                 | NA                                                                                                                                                                                           | NA                                                                |    |
| 4168 | 4173 | Cil_03G      | ECM |    | Q9SD53/459/Y37<br>20_ARATH<br>UPF0481 protein<br>At3g47200<br>OS=Arabidopsis<br>thaliana<br>GN=At3g47200<br>PE=2 SV=1 | K07393/ECM4,<br>glutathionyl-<br>hydroquinone                      | B9RP72/433/B9R<br>P72_RICCO<br>Putative<br>uncharacterized<br>protein<br>OS=Ricinus<br>communis<br>GN=RCOM_092<br>4580 PE=4 SV=1<br>U5G7Z2/96/U5G<br>7Z2_POPTR<br>Uncharacterized<br>protein | 1/1/IPR004158;<br>Protein of<br>unknown function<br>DUF247, plant | NA |
| 068  | 679  | _00291V<br>2 | 4   |    |                                                                                                                       |                                                                    |                                                                                                                                                                                              |                                                                   |    |
| 4176 | 4177 | Cil_03G      | NA  |    |                                                                                                                       |                                                                    |                                                                                                                                                                                              |                                                                   |    |
| 411  | 643  | _00292V<br>2 |     | NA | K16276/K1627<br>6,/zinc                                                                                               | OS=Populus<br>trichocarpa<br>GN=POPTR_000<br>8s12240g PE=4<br>SV=1 | NA                                                                                                                                                                                           | NA                                                                |    |

|      |      |                |                             |                                                                                                                                 |                                      |                                                                                                                |                                                                                                                      |                                                                                                                                             |
|------|------|----------------|-----------------------------|---------------------------------------------------------------------------------------------------------------------------------|--------------------------------------|----------------------------------------------------------------------------------------------------------------|----------------------------------------------------------------------------------------------------------------------|---------------------------------------------------------------------------------------------------------------------------------------------|
| 4188 | 4193 | Cil_03G_00293V | FRS1<br>1/FH<br>Y3/F<br>AR1 | Q9SY66/680/FRS11_ARATH<br>Protein FAR1-RELATED<br>SEQUENCE 11<br>OS=Arabidopsis thaliana<br>GN=FRS11 PE=2<br>SV=1               | K17604/ZSWI<br>M3/finger             | M5XX99/679/M5XX99_PRUPE<br>Uncharacterized protein<br>OS=Prunus persica<br>GN=PRUPE_ppa002379mg PE=4<br>SV=1   | 5/IPR018289;<br>MULE<br>transposase<br>domain/IPR031052; FHY3/FAR1<br>family                                         | GO:0006355;<br>regulation of transcription,<br>DNA-templated;<br>process GO:0008270; zinc ion<br>binding; function                          |
| 4191 | 4191 | Cil_03G_00294V | NA                          | NA                                                                                                                              | NA                                   | NA                                                                                                             | NA                                                                                                                   | NA                                                                                                                                          |
| 4194 | 4195 | Cil_03G_00295V | M3K<br>3/MA<br>P3K3         | O22042/337/M3K3_ARATH<br>Mitogen-activated protein kinase<br>kinase kinase 3<br>OS=Arabidopsis thaliana<br>GN=ANP3 PE=1<br>SV=1 | K04421/MAP3<br>K3,/mitogen-activated | B9SS78/356/B9S78_RICCO<br>ATP binding protein,<br>putative<br>OS=Ricinus communis<br>GN=RCOM_0618950 PE=4 SV=1 | 4/IPR008271;<br>Serine/threonine-protein kinase,<br>active<br>site/IPR017441;<br>Protein kinase,<br>ATP binding site | GO:0004672;<br>protein kinase activity;<br>function GO:0005524; ATP binding;<br>function GO:0006468; protein<br>phosphorylation;<br>process |
| 4197 | 4198 | Cil_03G_00296V | NA                          | NA                                                                                                                              | NA                                   | A0A067L202/398/A0A067L202_J<br>ATCU<br>Uncharacterized protein                                                 | NA                                                                                                                   | NA                                                                                                                                          |

|       |              |              |                         |                    |       |       |                                                                                                                              |                                                                                                                                                                                     |                                                                                    |                                                                                                                      |    |
|-------|--------------|--------------|-------------------------|--------------------|-------|-------|------------------------------------------------------------------------------------------------------------------------------|-------------------------------------------------------------------------------------------------------------------------------------------------------------------------------------|------------------------------------------------------------------------------------|----------------------------------------------------------------------------------------------------------------------|----|
|       | 1587<br>5804 | 1587<br>9906 | Cil_05G<br>_01245V<br>2 | NA                 |       | NA    | NA                                                                                                                           | OS=Jatropha<br>curcas<br>GN=JCGZ_00264<br>PE=4 SV=1<br>A2ZNX3/491/A2<br>ZNX3_ORYSJ<br>Uncharacterized<br>protein OS=Oryza<br>sativa subsp.<br>japonica<br>GN=OsJ_00252<br>PE=4 SV=1 | NA                                                                                 | NA                                                                                                                   |    |
|       |              |              |                         |                    | 0.163 | 1.886 | O04064/377/FLL<br>H_POPTR<br>Floricaula/leafy<br>homolog<br>OS=Populus<br>trichocarpa<br>GN=FL PE=2<br>SV=2<br>Q8GUQ5/463/BR |                                                                                                                                                                                     |                                                                                    |                                                                                                                      |    |
| chr05 | 1588<br>0858 | 1588<br>3723 | Cil_05G<br>_01246V<br>2 | NA                 |       |       | NA                                                                                                                           | D1MLK1/385/D1<br>MLK1_9ROSI<br>LEAFY-like<br>protein<br>OS=Juglans regia<br>PE=2 SV=3                                                                                               | 1/1/IPR002910;<br>Floricaula/leafy<br>protein                                      | GO:0003677;<br>DNA binding;<br>function GO:00063<br>55; regulation of<br>transcription,<br>DNA-templated;<br>process |    |
|       | 1595<br>1937 | 1595<br>8151 | Cil_05G<br>_01247V<br>2 | BRI1/<br>IRAK<br>4 | 0.161 | 1.831 | II_SOLLC<br>Brassinosteroid<br>LRR receptor<br>kinase<br>OS=Solanum                                                          | K04733/IRAK4<br>/receptor-<br>associated                                                                                                                                            | A0A078E673/192<br>/A0A078E673_B<br>RANA<br>BnaA07g31330D<br>protein<br>OS=Brassica | NA                                                                                                                   | NA |

|      |      |         |        |       |       |    |                   |               |                 |                |                  |  |
|------|------|---------|--------|-------|-------|----|-------------------|---------------|-----------------|----------------|------------------|--|
| 1596 | 1596 | Cil_05G | LRR    |       |       |    | lycopersicum      |               | napus           |                |                  |  |
| 2118 | 4118 | _01248V | recept |       |       |    | GN=CURL3          |               | GN=BnaA07g313   |                |                  |  |
|      |      | 2       | or-    |       |       |    | PE=1 SV=1         |               | 30D PE=4 SV=1   |                |                  |  |
|      |      |         | like/E |       |       |    | Q8VZG8/684/Y4     |               |                 |                |                  |  |
|      |      |         | IX1    |       |       |    | 885_ARATH         |               | A0A067KG50/68   |                |                  |  |
|      |      |         |        |       |       |    | Probable LRR      |               | 1/A0A067KG50_   |                |                  |  |
|      |      |         |        |       |       |    | receptor-like     |               | JATCU           |                |                  |  |
|      |      |         |        |       |       |    | serine/threonine- | K13466/EIX1_2 | Uncharacterized | 1/1/IPR001611; | GO:0005515;      |  |
|      |      |         |        |       |       |    | protein kinase    | /receptor     | protein         | Leucine-rich   | protein binding; |  |
|      |      |         |        |       |       |    | At4g08850         |               | OS=Jatropha     | repeat         | function         |  |
|      |      |         |        |       |       |    | OS=Arabidopsis    |               | curcas          |                |                  |  |
|      |      |         |        |       |       |    | thaliana          |               | GN=JCGZ_10954   |                |                  |  |
|      |      |         |        |       |       |    | GN=At4g08850      |               | PE=4 SV=1       |                |                  |  |
|      |      |         |        |       |       |    | PE=2 SV=3         |               |                 |                |                  |  |
|      |      |         |        |       |       |    |                   |               | M5WEH8/276/M    |                |                  |  |
|      |      |         |        |       |       |    |                   |               | 5WEH8_PRUPE     |                |                  |  |
|      |      |         |        |       |       |    |                   |               | Uncharacterized |                |                  |  |
|      |      |         |        |       |       |    |                   |               | protein         |                |                  |  |
| 1609 | 1610 | Cil_05G | AP4    | 0.168 | 2.100 | NA |                   | K12402/AP4M1  | (Fragment)      | NA             | NA               |  |
| 5491 | 0046 | _01249V | M1     |       |       |    |                   | /complex      | OS=Prunus       |                |                  |  |
|      |      | 2       |        |       |       |    |                   |               | persica         |                |                  |  |
|      |      |         |        |       |       |    |                   |               | GN=PRUPE_ppa    |                |                  |  |
|      |      |         |        |       |       |    |                   |               | 019056mg PE=4   |                |                  |  |
|      |      |         |        |       |       |    |                   |               | SV=1            |                |                  |  |



|      |      |         |      |                                      |                                            |                                                     |                                                                                           |
|------|------|---------|------|--------------------------------------|--------------------------------------------|-----------------------------------------------------|-------------------------------------------------------------------------------------------|
| 1610 | 1612 | Cil_05G | IRX1 | Q940Q8/415/IX1                       | A0A067F2D2/41                              |                                                     |                                                                                           |
| 2819 | 1813 | _01250V | 0    | 0L_ARATH                             | 6/A0A067F2D2_                              |                                                     |                                                                                           |
|      |      | 2       |      | Probable beta-1,4-xylosyltransferase | CITSI                                      |                                                     |                                                                                           |
|      |      |         |      | IRX10L                               | Uncharacterized protein OS=Citrus sinensis | 1/1/IPR004263;                                      | NA                                                                                        |
|      |      |         |      | OS=Arabidopsis thaliana              | GN=CISIN_1g04                              | Exostosin-like                                      |                                                                                           |
|      |      |         |      | GN=IRX10L                            | 8016mg PE=4                                |                                                     |                                                                                           |
|      |      |         |      | PE=2 SV=1                            | SV=1                                       |                                                     |                                                                                           |
|      |      |         |      |                                      | B9RA53/169/B9                              |                                                     |                                                                                           |
|      |      |         |      |                                      | RA53_RICCO                                 |                                                     |                                                                                           |
|      |      |         |      |                                      | Electron transporter,                      | 2/IPR024934;                                        |                                                                                           |
| 1616 | 1616 | Cil_05G | nirA | NA                                   | putative OS=Ricinus communis               | Rubredoxin-like domain/IPR024935; Rubredoxin domain | GO:0005506; iron ion binding; function                                                    |
| 1725 | 3917 | _01251V |      |                                      | GN=RCOM_150                                |                                                     |                                                                                           |
|      |      | 2       |      |                                      | 3210 PE=4 SV=1                             |                                                     |                                                                                           |
|      |      |         |      |                                      |                                            |                                                     |                                                                                           |
|      |      |         |      | Q9FI46/269/CRL                       | A0A061FZN4/26                              |                                                     |                                                                                           |
|      |      |         |      | _ARATH                               | 9/A0A061FZN4_                              |                                                     |                                                                                           |
|      |      |         |      | Chromophore lyase CRL, chloroplastic | THECC                                      | 1/1/IPR010404;                                      | GO:0016829; lyase activity; function GO:001709; protein-phytylcyanobilin linkage; process |
| 1616 | 1616 | Cil_05G | CRL  |                                      | JHL07K02.6                                 | Chromophore lyase CpcT/CpeT                         |                                                                                           |
| 5061 | 9139 | _01252V |      |                                      | protein OS=Theobroma cacao                 |                                                     |                                                                                           |
|      |      | 2       |      | OS=Arabidopsis thaliana GN=CRL       |                                            |                                                     |                                                                                           |
|      |      |         |      | PE=1 SV=1                            |                                            |                                                     |                                                                                           |

|              |              |                         |                          |       |       |                                                                                                                                                         |                              |                                                                                                                                                                                                                                                                                                                   |                                                               |    |
|--------------|--------------|-------------------------|--------------------------|-------|-------|---------------------------------------------------------------------------------------------------------------------------------------------------------|------------------------------|-------------------------------------------------------------------------------------------------------------------------------------------------------------------------------------------------------------------------------------------------------------------------------------------------------------------|---------------------------------------------------------------|----|
| 1621<br>0339 | 1621<br>1361 | Cil_05G<br>_01253V<br>2 | SDA<br>F2/S<br>DHA<br>F2 | 0.174 | 1.976 | Q9FI44/188/SDA<br>F2_ARATH<br>Succinate<br>dehydrogenase<br>assembly factor 2,<br>mitochondrial<br>OS=Arabidopsis<br>thaliana<br>GN=SDHAF2<br>PE=1 SV=1 | K18168/SDHA<br>F2,/succinate | GN=TCM_01477<br>4 PE=3 SV=1<br>A0A061G020/17<br>8/A0A061G020_<br>THECC<br>Uncharacterized<br>protein<br>OS=Theobroma<br>cacao<br>GN=TCM_01477<br>6 PE=4 SV=1<br>U5CX01/417/U5<br>CX01_AMBTC<br>Uncharacterized<br>protein<br>(Fragment)<br>OS=Amborella<br>trichopoda<br>GN=AMTR_s046<br>53p00000520<br>PE=4 SV=1 | 1/1/IPR005631;<br>Flavinator of<br>succinate<br>dehydrogenase | NA |
| 1642<br>9328 | 1643<br>1276 | Cil_05G<br>_01256V<br>2 | CAB<br>39                | 0.172 | 1.986 | NA                                                                                                                                                      | K08272/CAB39<br>,/calcium    | NA                                                                                                                                                                                                                                                                                                                | NA                                                            | NA |
| 1645<br>0437 | 1645<br>1043 | Cil_05G<br>_01257V<br>2 | NA                       |       |       | NA                                                                                                                                                      | NA                           | NA                                                                                                                                                                                                                                                                                                                | NA                                                            | NA |



|      |      |         |      |                |                 |                     |  |                    |
|------|------|---------|------|----------------|-----------------|---------------------|--|--------------------|
| 1163 | 1163 | Cil_06G | RNH  | P0C2F6/610/RN  | M5VP36/450/M5   |                     |  |                    |
| 1390 | 9084 | _00581V | X1   | HX1_ARATH      | VP36_PRUPE      |                     |  |                    |
|      |      | 2       |      | Putative       | Uncharacterized |                     |  |                    |
|      |      |         |      | ribonuclease H | protein         | 1/1/IPR026960;      |  |                    |
|      |      |         |      | protein        | (Fragment)      | Reverse             |  | NA                 |
|      |      |         |      | At1g65750      | OS=Prunus       | transcriptase zinc- |  |                    |
|      |      |         |      | OS=Arabidopsis | persica         | binding domain      |  |                    |
|      |      |         |      | thaliana       | GN=PRUPE_ppa    |                     |  |                    |
|      |      |         |      | GN=At1g65750   | 014760mg PE=4   |                     |  |                    |
|      |      |         |      | PE=3 SV=1      | SV=1            |                     |  |                    |
|      |      |         |      |                | U5FTI0/443/U5F  |                     |  |                    |
|      |      |         |      |                | TI0_POPTR       |                     |  |                    |
|      |      |         |      |                | Uncharacterized |                     |  |                    |
|      |      |         |      |                | protein         | 1/1/IPR007021;      |  |                    |
| 1164 | 1164 | Cil_06G | UPF1 | NA             | (Fragment)      | Domain of           |  | NA                 |
| 0735 | 2495 | _00582V |      |                | OS=Populus      | unknown function    |  |                    |
|      |      | 2       |      |                | trichocarpa     | DUF659              |  |                    |
|      |      |         |      |                | GN=POPTR_001    |                     |  |                    |
|      |      |         |      |                | 2s046402g PE=4  |                     |  |                    |
|      |      |         |      |                | SV=1            |                     |  |                    |
|      |      |         |      | Q53FA7/328/QO  | W9RDH2/325/W    | 4/IPR013154;        |  | GO:0008270; zinc   |
| 1167 | 1167 | Cil_06G | QQR  | RX_HUMAN       | 9RDH2_9ROSA     | Alcohol             |  | ion binding;       |
| 4044 | 9664 | _00583V | X/NA | Quinone        | Quinone         | dehydrogenase,      |  | function GO:00164  |
|      |      | 2       | DPH  | oxidoreductase | oxidoreductase  | N-                  |  | 91; oxidoreductase |
|      |      |         | 2    | PIG3 OS=Homo   | PIG3 OS=Morus   | terminal/IPR0208    |  | activity;          |
|      |      |         |      | sapiens        | notabilis       | 43; Polyketide      |  | function GO:00551  |





|      |      |              |      |    |                           |                                                                                                                                                                       |                                                           |                              |                                                                                                                                                                                                                                                                                                                                                                                          |
|------|------|--------------|------|----|---------------------------|-----------------------------------------------------------------------------------------------------------------------------------------------------------------------|-----------------------------------------------------------|------------------------------|------------------------------------------------------------------------------------------------------------------------------------------------------------------------------------------------------------------------------------------------------------------------------------------------------------------------------------------------------------------------------------------|
| 2046 | 2047 | Cil_06G      | ATPF |    |                           |                                                                                                                                                                       | 90100 PE=4<br>SV=1                                        |                              | GO:0015986; ATP<br>synthesis coupled<br>proton transport;<br>process GO:00452<br>61; proton-<br>transporting ATP<br>synthase complex,<br>catalytic core F(1);<br>component GO:00<br>46933; proton-<br>transporting ATP<br>synthase activity,<br>rotational<br>mechanism;<br>function GO:00469<br>61; proton-<br>transporting<br>ATPase activity,<br>rotational<br>mechanism;<br>function |
| 2316 | 8903 | _00974V<br>2 | 1G   | NA | K02115/ATPF1<br>G,/F-type | A0A061GFS8/81<br>6/A0A061GFS8_<br>THECC<br>Homeodomain-<br>like superfamily<br>protein, putative<br>isoform 1<br>OS=Theobroma<br>cacao<br>GN=TCM_03022<br>5 PE=4 SV=1 | 1/1/IPR000131;<br>ATPase, F1<br>complex, gamma<br>subunit |                              |                                                                                                                                                                                                                                                                                                                                                                                          |
| 2047 | 2047 | Cil_06G      | ATPa |    |                           |                                                                                                                                                                       | W9RS11/300/W9<br>RS11_9ROSA<br>Uncharacterized            | 1/1/IPR000131;<br>ATPase, F1 | GO:0015986; ATP<br>synthesis coupled<br>proton transport;                                                                                                                                                                                                                                                                                                                                |
| 8979 | 9923 | _00975V<br>2 | se   | NA | NA                        |                                                                                                                                                                       |                                                           |                              |                                                                                                                                                                                                                                                                                                                                                                                          |

|      |      |              |     |                                                                                        |                                                                  |                                                                                                |                                                                                                                                                                                                                                                                                                                             |
|------|------|--------------|-----|----------------------------------------------------------------------------------------|------------------------------------------------------------------|------------------------------------------------------------------------------------------------|-----------------------------------------------------------------------------------------------------------------------------------------------------------------------------------------------------------------------------------------------------------------------------------------------------------------------------|
|      |      |              |     |                                                                                        | protein<br>OS=Morus<br>notabilis<br>GN=L484_01130<br>5 PE=4 SV=1 | complex, gamma<br>subunit                                                                      | process GO:00452<br>61; proton-<br>transporting ATP<br>synthase complex,<br>catalytic core F(1);<br>component GO:00<br>46933; proton-<br>transporting ATP<br>synthase activity,<br>rotational<br>mechanism;<br>function GO:00469<br>61; proton-<br>transporting<br>ATPase activity,<br>rotational<br>mechanism;<br>function |
| 2048 | 2048 | Cil_06G      | MYB | O22059/76/CPC_                                                                         |                                                                  | A0A059DGB6/73                                                                                  |                                                                                                                                                                                                                                                                                                                             |
| 2545 | 3007 | _00976V<br>2 | P   | ARATH<br>Transcription<br>factor CPC<br>OS=Arabidopsis<br>thaliana GN=CPC<br>PE=1 SV=1 | K09422/MYBP/<br>factor                                           | /A0A059DGB6_<br>EUCGR<br>Uncharacterized<br>protein<br>OS=Eucalyptus<br>grandis<br>GN=EUGRSUZ_ | 2/IPR001005;<br>SANT/Myb<br>domain/IPR01787<br>7; Myb-like<br>domain<br>NA                                                                                                                                                                                                                                                  |



|              |              |                         |             |       |       |                                                                                                    |                                     |  |                                                                                                                                 |                                                                                                                   |    |                                                                                                                                                                                                                      |
|--------------|--------------|-------------------------|-------------|-------|-------|----------------------------------------------------------------------------------------------------|-------------------------------------|--|---------------------------------------------------------------------------------------------------------------------------------|-------------------------------------------------------------------------------------------------------------------|----|----------------------------------------------------------------------------------------------------------------------------------------------------------------------------------------------------------------------|
|              |              |                         |             |       |       |                                                                                                    |                                     |  | A01720 PE=4<br>SV=1                                                                                                             |                                                                                                                   |    | GO:0004601;<br>peroxidase<br>activity;<br>function GO:00069<br>79; response to<br>oxidative stress;<br>process GO:00200<br>37; heme binding;<br>function GO:00551<br>14; oxidation-<br>reduction process;<br>process |
| 2049<br>7007 | 2049<br>8709 | Cil_06G<br>_00977V<br>2 | PER4<br>2   |       |       | Q9SB81/330/PER<br>42_ARATH<br>Peroxidase 42<br>OS=Arabidopsis<br>thaliana<br>GN=PER42 PE=1<br>SV=2 | K00430/E1.11.1<br>.7/1.11.1.7       |  | A0A067JMN0/33<br>1/A0A067JMN0_<br>JATCU<br>Peroxidase<br>OS=Jatropha<br>curcas<br>GN=JCGZ_21220<br>PE=3 SV=1                    | 2/IPR000823;<br>Plant<br>peroxidase/IPR00<br>2016; Haem<br>peroxidase,<br>plant/fungal/bacte<br>rial              |    |                                                                                                                                                                                                                      |
| 2971<br>1110 | 2971<br>2618 | Cil_06G<br>_01383V<br>2 | MIM<br>R1_2 | 0.180 | 1.705 | NA                                                                                                 | K18081/MTMR<br>1_2/--               |  | A0A0A0L0Z9/49<br>0/A0A0A0L0Z9_<br>CUCSA<br>Uncharacterized<br>protein<br>OS=Cucumis<br>sativus<br>GN=Csa_4G2962<br>60 PE=4 SV=1 | 2/IPR007700;<br>Protein of<br>unknown function<br>DUF668/IPR0218<br>64; Protein of<br>unknown function<br>DUF3475 | NA |                                                                                                                                                                                                                      |
| 2974<br>6960 | 2974<br>9069 | Cil_06G<br>_01384V<br>2 | DHX<br>37   |       |       | NA                                                                                                 | K14780/DHX37<br>./ATP-<br>dependent |  | B9HBV0/505/B9<br>HBV0_POPTR<br>Uncharacterized                                                                                  | 1/1/IPR006740;<br>Protein of                                                                                      | NA |                                                                                                                                                                                                                      |





|       |              |              |                         |           |       |       |    |    |                                                                                                                  |                                                                                                                                                                                                                                                                                                             |                                                                                                                                           |                                             |
|-------|--------------|--------------|-------------------------|-----------|-------|-------|----|----|------------------------------------------------------------------------------------------------------------------|-------------------------------------------------------------------------------------------------------------------------------------------------------------------------------------------------------------------------------------------------------------------------------------------------------------|-------------------------------------------------------------------------------------------------------------------------------------------|---------------------------------------------|
|       |              |              |                         |           |       |       |    |    | serine/threonine-<br>protein kinase<br>GSO2<br>OS=Arabidopsis<br>thaliana<br>GN=GSO2 PE=2<br>SV=2                | protein<br>OS=Prunus<br>persica<br>GN=PRUPE_ppa<br>026755mg PE=4<br>SV=1                                                                                                                                                                                                                                    |                                                                                                                                           |                                             |
|       |              |              |                         |           |       |       |    |    | Q9C9H7/834/RL<br>P12_ARATH<br>Receptor-like<br>protein 12<br>OS=Arabidopsis<br>thaliana<br>GN=RLP12 PE=2<br>SV=2 | A0A061ER57/10<br>45/A0A061ER57<br>_THECC LRR<br>receptor-like<br>serine/threonine-<br>protein kinase<br>GSO1, putative<br>OS=Theobroma<br>cacao<br>GN=TCM_02164<br>6 PE=4 SV=1<br>A0A061EQX7/12<br>9/A0A061EQX7_<br>THECC 5'-3'<br>exonuclease<br>family protein<br>isoform 2<br>(Fragment)<br>OS=Theobroma | 3/IPR003591;<br>Leucine-rich<br>repeat, typical<br>subtype/IPR0132<br>10; Leucine-rich<br>repeat-containing<br>N-terminal, plant-<br>type | GO:0005515;<br>protein binding;<br>function |
|       | 1817<br>7192 | 1818<br>0451 | Cil_07G<br>_01195V<br>2 | RLP1<br>2 |       |       |    |    | K13468/K1346<br>8./disease                                                                                       |                                                                                                                                                                                                                                                                                                             |                                                                                                                                           |                                             |
| chr09 | 3107<br>180  | 3110<br>238  | Cil_09G<br>_00194V<br>2 | NA        | 0.208 | 2.879 | NA | NA |                                                                                                                  |                                                                                                                                                                                                                                                                                                             | NA                                                                                                                                        | NA                                          |

|             |             |                         |           |                                                                                |                              |                                                                                                                                                                                                                        |                                                                                                                              |                                                                                          |
|-------------|-------------|-------------------------|-----------|--------------------------------------------------------------------------------|------------------------------|------------------------------------------------------------------------------------------------------------------------------------------------------------------------------------------------------------------------|------------------------------------------------------------------------------------------------------------------------------|------------------------------------------------------------------------------------------|
| 3110<br>293 | 3141<br>222 | Cil_09G<br>_00195V<br>2 | POL<br>A  | NA                                                                             | K02335/poIA/polymerase       | cacao<br>GN=TCM_01988<br>3 PE=4 SV=1<br>D7T2D6/441/D7<br>T2D6_VITVI<br>Putative<br>uncharacterized<br>protein OS=Vitis<br>vinifera<br>GN=VIT_05s009<br>4g00430 PE=4<br>SV=1<br>A0A0A0K988/22<br>8/A0A0A0K988_<br>CUCSA | 2/IPR002421; 5'-<br>3' exonuclease, N-<br>terminal/IPR0200<br>46; 5'-3'<br>exonuclease,<br>alpha-helical arch,<br>N-terminal | GO:0003677;<br>DNA binding;<br>function                                                  |
| 3144<br>134 | 3150<br>489 | Cil_09G<br>_00196V<br>2 | NA        | NA                                                                             | NA                           | Uncharacterized<br>protein<br>OS=Cucumis<br>sativus<br>GN=Csa_6G0861<br>60 PE=4 SV=1                                                                                                                                   | 1/1/IPR008881;<br>Trigger factor,<br>ribosome-binding,<br>bacterial                                                          | GO:0006457;<br>protein folding;<br>process GO:00150<br>31; protein<br>transport; process |
| 3151<br>494 | 3153<br>161 | Cil_09G<br>_00197V<br>2 | SRP1<br>4 | O04421/111/SRP<br>14_ARATH<br>Signal recognition<br>particle 14 kDa<br>protein | K03104/SRP14/<br>recognition | I3SA11/120/I3SA<br>11_LOTJA<br>Uncharacterized<br>protein OS=Lotus                                                                                                                                                     | 1/1/IPR003210;<br>Signal recognition<br>particle, SRP14<br>subunit                                                           | GO:0005786;<br>signal recognition<br>particle,<br>endoplasmic<br>reticulum               |

|             |             |                 |      |                                                                                      |                           |                                                                                               |                                                                                                                       |                                                                                                                                                                                                                                   |
|-------------|-------------|-----------------|------|--------------------------------------------------------------------------------------|---------------------------|-----------------------------------------------------------------------------------------------|-----------------------------------------------------------------------------------------------------------------------|-----------------------------------------------------------------------------------------------------------------------------------------------------------------------------------------------------------------------------------|
|             |             |                 |      | OS=Arabidopsis thaliana<br>GN=SRP14 PE=2<br>SV=2                                     |                           | japonicus PE=2<br>SV=1                                                                        |                                                                                                                       | targeting;<br>component GO:006614; SRP-dependent<br>cotranslational<br>protein targeting to membrane;<br>process GO:0008312; 7S RNA<br>binding;<br>function GO:0030942; endoplasmic reticulum signal peptide binding;<br>function |
| 3159<br>113 | 3159<br>838 | Cil_09G_00198V2 | MER  | E7C196/97/MER_ERYCB<br>Methylecgonone reductase<br>OS=Erythroxylum coca PE=1<br>SV=1 | K22374/DMAS1/reductase    | Q5Y381/100/Q5Y381_FRAAN<br>Aldo/keto reductase<br>OS=Fragaria ananassa<br>GN=AKR PE=2<br>SV=1 | 2/IPR001395;<br>Aldo/keto reductase/potassium channel subunit beta/IPR023210;<br>NADP-dependent oxidoreductase domain | NA                                                                                                                                                                                                                                |
| 3163<br>413 | 3164<br>451 | Cil_09G_00199V2 | CHI5 | Q9M2U5/273/CHI5_ARATH<br>Endochitinase                                               | K01183/E3.2.1.14/3.2.1.14 | F6HB09/274/F6HB09_VITVI<br>Putative                                                           | 3/IPR001002;<br>Chitin-binding, type                                                                                  | GO:0004568;<br>chitinase activity;<br>function GO:00060                                                                                                                                                                           |

|              |              |                         |           |       |       |  |  |  |                                                                                                     |                               |  |  |  |                                                                               |                                                                                                                                     |                                                                                                                                                                                                                                                               |                                                                                                                                                                                                                                                                                                                                                                                                                                                                                                 |
|--------------|--------------|-------------------------|-----------|-------|-------|--|--|--|-----------------------------------------------------------------------------------------------------|-------------------------------|--|--|--|-------------------------------------------------------------------------------|-------------------------------------------------------------------------------------------------------------------------------------|---------------------------------------------------------------------------------------------------------------------------------------------------------------------------------------------------------------------------------------------------------------|-------------------------------------------------------------------------------------------------------------------------------------------------------------------------------------------------------------------------------------------------------------------------------------------------------------------------------------------------------------------------------------------------------------------------------------------------------------------------------------------------|
|              |              |                         |           |       |       |  |  |  | EP3<br>OS=Arabidopsis<br>thaliana GN=EP3<br>PE=1 SV=1                                               |                               |  |  |  |                                                                               | uncharacterized<br>protein OS=Vitis<br>vinifera<br>GN=VIT_05s009<br>4g00220 PE=4<br>SV=1                                            | 1/IPR018371;<br>Chitin-binding,<br>type 1, conserved<br>site                                                                                                                                                                                                  | 32; chitin catabolic<br>process;<br>process GO:00080<br>61; chitin binding;<br>function GO:00169<br>98; cell wall<br>macromolecule<br>catabolic process;<br>process<br>GO:0004568;<br>chitinase activity;<br>function GO:00060<br>32; chitin catabolic<br>process;<br>process GO:00080<br>61; chitin binding;<br>function GO:00169<br>98; cell wall<br>macromolecule<br>catabolic process;<br>process<br>GO:0005524; ATP<br>binding;<br>function GO:00068<br>10; transport;<br>process GO:00160 |
| 3189<br>870  | 3190<br>821  | Cil_09G<br>_00200V<br>2 | CHI5      |       |       |  |  |  | Q9M2U5/171/CH<br>I5_ARATH<br>Endochitinase<br>EP3<br>OS=Arabidopsis<br>thaliana GN=EP3<br>PE=1 SV=1 | K01183/E3.2.1.<br>14/3.2.1.14 |  |  |  |                                                                               | F6HAW1/172/F6<br>HAW1_VITVI<br>Putative<br>uncharacterized<br>protein OS=Vitis<br>vinifera<br>GN=VIT_05s009<br>4g00260 PE=4<br>SV=1 | 2/IPR000726;<br>Glycoside<br>hydrolase, family<br>19,<br>catalytic/IPR0010<br>02; Chitin-<br>binding, type 1                                                                                                                                                  | 32; chitin catabolic<br>process;<br>process GO:00080<br>61; chitin binding;<br>function GO:00169<br>98; cell wall<br>macromolecule<br>catabolic process;<br>process<br>GO:0005524; ATP<br>binding;<br>function GO:00068<br>10; transport;<br>process GO:00160                                                                                                                                                                                                                                   |
| 2190<br>3147 | 2191<br>1642 | Cil_09G<br>_01375V<br>2 | ABC<br>B1 | 0.166 | 1.585 |  |  |  | Q9M3B9/1408/A<br>B20B_ARATH<br>ABC transporter<br>B family member<br>20                             | K05658/ABCB<br>1./ATP-binding |  |  |  | A0A097P9R0/14<br>04/A0A097P9R0<br>_HEVBR ABC<br>transporter family<br>protein | 3/IPR003593;<br>AAA+ ATPase<br>domain/IPR01152<br>7; ABC<br>transporter type 1,                                                     | 32; chitin catabolic<br>process;<br>process GO:00080<br>61; chitin binding;<br>function GO:00169<br>98; cell wall<br>macromolecule<br>catabolic process;<br>process<br>GO:0005524; ATP<br>binding;<br>function GO:00068<br>10; transport;<br>process GO:00160 |                                                                                                                                                                                                                                                                                                                                                                                                                                                                                                 |

|      |      |                |     |                                                                                                                         |                           |                                                                                                                   |                                                             |                                                                                                                                                                                                                                                                                                                                                                                        |
|------|------|----------------|-----|-------------------------------------------------------------------------------------------------------------------------|---------------------------|-------------------------------------------------------------------------------------------------------------------|-------------------------------------------------------------|----------------------------------------------------------------------------------------------------------------------------------------------------------------------------------------------------------------------------------------------------------------------------------------------------------------------------------------------------------------------------------------|
|      |      |                |     | OS=Arabidopsis thaliana<br>GN=ABCB20<br>PE=1 SV=1                                                                       |                           | OS=Hevea brasiliensis<br>GN=ABCB20<br>PE=2 SV=1                                                                   | transmembrane domain                                        | 21; integral component of membrane; component GO:0016887; ATPase activity; function GO:0042626; ATPase activity, coupled to transmembrane movement of substances; function GO:0055085; transmembrane transport; process GO:0005524; ATP binding; function GO:0006810; transport; process GO:0016021; integral component of membrane; component GO:0042626; ATPase activity, coupled to |
| 2191 | 2192 | Cil_09G_01376V | ABC | Q9M3B9/280/AB20B_ARATH<br>ABC transporter<br>B family member<br>20<br>OS=Arabidopsis thaliana<br>GN=ABCB20<br>PE=1 SV=1 | K05658/ABCB1,/ATP-binding | A0A0A0KS59/269/A0A0A0KS59_CUCSA<br>Uncharacterized protein<br>OS=Cucumis sativus<br>GN=Csa_5G5057<br>70 PE=4 SV=1 | 1/1/IPR011527; ABC transporter type 1, transmembrane domain | 10; transport; process GO:0016021; integral component of membrane; component GO:0042626; ATPase activity, coupled to                                                                                                                                                                                                                                                                   |



|              |              |                         |            |                                                                                                           |                            |                                                                                                                                                                                                                                                                                |                                                                                                      |                                                                                                                                                                                                                                                                    |
|--------------|--------------|-------------------------|------------|-----------------------------------------------------------------------------------------------------------|----------------------------|--------------------------------------------------------------------------------------------------------------------------------------------------------------------------------------------------------------------------------------------------------------------------------|------------------------------------------------------------------------------------------------------|--------------------------------------------------------------------------------------------------------------------------------------------------------------------------------------------------------------------------------------------------------------------|
| 2192<br>7874 | 2193<br>3714 | Cil_09G<br>_01377V<br>2 | RPL2<br>3a | Q9AT35/152/RL2<br>3A_DAUCA 60S<br>ribosomal protein<br>L23a OS=Daucus<br>carota<br>GN=RPL23A<br>PE=2 SV=1 | K02893/RP-<br>L23Ae,/large | A0A067FK20/15<br>1/A0A067FK20_<br>CITSI<br>Uncharacterized<br>protein OS=Citrus<br>sinensis<br>GN=CISIN_1g03<br>1766mg PE=3<br>SV=1<br>A0A059A962/23<br>4/A0A059A962_<br>EUCGR<br>Uncharacterized<br>protein<br>OS=Eucalyptus<br>grandis<br>GN=EUGRSUZ_<br>J00059 PE=4<br>SV=1 | 3/IPR007750;<br>Protein of<br>unknown function<br>DUF674/IPR0130<br>25; Ribosomal<br>protein L25/L23 | transmembrane<br>movement of<br>substances;<br>function GO:00550<br>85; transmembrane<br>transport; process<br>GO:0003735;<br>structural<br>constituent of<br>ribosome;<br>function GO:00058<br>40; ribosome;<br>component GO:00<br>06412; translation;<br>process |
| 2194<br>1776 | 2194<br>2743 | Cil_09G<br>_01378V<br>2 | NA         | NA                                                                                                        | NA                         | Uncharacterized<br>protein<br>OS=Eucalyptus<br>grandis<br>GN=EUGRSUZ_<br>J00059 PE=4<br>SV=1                                                                                                                                                                                   | 1/1/IPR007750;<br>Protein of<br>unknown function<br>DUF674                                           | NA                                                                                                                                                                                                                                                                 |

|      |      |         |     |                              |                                        |                                                         |                                                                                                                             |
|------|------|---------|-----|------------------------------|----------------------------------------|---------------------------------------------------------|-----------------------------------------------------------------------------------------------------------------------------|
| 2194 | 2194 | Cil_09G | MKP | Q9C5S1/784/MK                | A0A061FMQ2/84                          |                                                         | GO:0003779; actin binding;                                                                                                  |
| 4787 | 7961 | _01379V | 1   | P1_ARATH                     | 9/A0A061FMQ2_                          | 6/IPR020422;                                            | function GO:0004725; protein tyrosine phosphatase activity;                                                                 |
|      |      | 2       |     | Protein-tyrosine-phosphatase | THECC Mitogen-activated protein kinase | Dual specificity protein phosphatase                    | function GO:0006470; protein dephosphorylation; process GO:0008138; protein tyrosine/serine/threonine phosphatase activity; |
|      |      |         |     | MKP1                         | OS=Arabidopsis thaliana                | domain/IPR024950; Dual specificity phosphatase          | function GO:0016311;                                                                                                        |
|      |      |         |     | OS=Arabidopsis thaliana      | GN=MKP1 PE=1 SV=1                      |                                                         | dephosphorylation; process GO:0016791; phosphatase activity; function                                                       |
|      |      |         |     |                              |                                        |                                                         | GO:0006812;                                                                                                                 |
|      |      |         |     |                              |                                        |                                                         | cation transport;                                                                                                           |
|      |      |         |     |                              |                                        |                                                         | process GO:0008324; cation                                                                                                  |
|      |      |         |     |                              |                                        |                                                         | transmembrane                                                                                                               |
| 2195 | 2195 | Cil_09G | MTP | O80632/359/MTP               | W9R2I1/359/W9                          | 2/IPR002524;                                            | GO:0006812;                                                                                                                 |
| 4383 | 8633 | _01380V | 11  | 11_ARATH                     | R2I1_9ROSA                             | Cation efflux protein/IPR027470; Cation efflux protein, | cation transport;                                                                                                           |
|      |      | 2       |     | Metal tolerance protein 11   | OS=Morus                               |                                                         | process GO:0008324; cation                                                                                                  |
|      |      |         |     | OS=Arabidopsis               |                                        |                                                         | transmembrane                                                                                                               |

|      |      |         |      |                |              |                  |                    |                    |
|------|------|---------|------|----------------|--------------|------------------|--------------------|--------------------|
|      |      |         |      | thaliana       |              | notabilis        | cytoplasmic        | transporter        |
|      |      |         |      | GN=MTP11       |              | GN=L484_02541    | domain             | activity;          |
|      |      |         |      | PE=2 SV=1      |              | 8 PE=4 SV=1      |                    | function GO:00160  |
|      |      |         |      |                |              |                  |                    | 21; integral       |
|      |      |         |      |                |              |                  |                    | component of       |
|      |      |         |      |                |              |                  |                    | membrane;          |
|      |      |         |      |                |              |                  |                    | component GO:00    |
|      |      |         |      |                |              |                  |                    | 55085;             |
|      |      |         |      |                |              |                  |                    | transmembrane      |
|      |      |         |      |                |              |                  |                    | transport; process |
|      |      |         |      |                |              | B9SAL5/94/B9S    |                    |                    |
|      |      |         |      |                |              | AL5_RICCO        |                    |                    |
|      |      |         |      |                |              | Putative         | 1/1/IPR006476;     |                    |
| 2197 | 2197 | Cil_09G | ENPP |                |              | uncharacterized  | Conserved          |                    |
| 2260 | 3961 | _01381V | 1_3  | NA             | K01513/ENPP1 | protein          | hypothetical       | NA                 |
|      |      | 2       |      |                | _3,/--       | OS=Ricinus       | protein            |                    |
|      |      |         |      |                |              | communis         | CHP01589, plant    |                    |
|      |      |         |      |                |              | GN=RCOM_110      |                    |                    |
|      |      |         |      |                |              | 3690 PE=4 SV=1   |                    |                    |
|      |      |         |      | Q9FRL8/211/DH  |              | J9WN12/210/J9    | 2/IPR004045;       |                    |
|      |      |         |      | AR2_ARATH      |              | WN12_POPTO       | Glutathione S-     |                    |
| 2197 | 2198 | Cil_09G | DHA  | Glutathione S- |              | Dehydroascorbate | transferase, N-    | GO:0005515;        |
| 6984 | 1485 | _01382V | R2   | transferase    | K21888/DHAR/ | reductase        | terminal/IPR0109   | protein binding;   |
|      |      | 2       |      | DHAR2          | --           | (Fragment)       | 87; Glutathione S- | function           |
|      |      |         |      | OS=Arabidopsis |              | OS=Populus       | transferase, C-    |                    |
|      |      |         |      | thaliana       |              | tomentosa        | terminal-like      |                    |









|              |              |                         |           |                                                                                                                       |                           |                                                                                                                               |                                                                                                    |                                                                                                                                                                                                                                                                                            |
|--------------|--------------|-------------------------|-----------|-----------------------------------------------------------------------------------------------------------------------|---------------------------|-------------------------------------------------------------------------------------------------------------------------------|----------------------------------------------------------------------------------------------------|--------------------------------------------------------------------------------------------------------------------------------------------------------------------------------------------------------------------------------------------------------------------------------------------|
|              |              |                         |           |                                                                                                                       |                           | 014760mg PE=4<br>SV=1                                                                                                         |                                                                                                    | GO:0006855; drug<br>transmembrane<br>transport;<br>process GO:00152<br>38; drug<br>transmembrane<br>transporter<br>activity;<br>function GO:00152<br>97; antiporter<br>activity;<br>function GO:00160<br>20; membrane;<br>component GO:00<br>55085;<br>transmembrane<br>transport; process |
| 1377<br>8612 | 1378<br>0962 | Cil_10G<br>_00536V<br>2 | DTX<br>41 | Q9LYT3/502/DT<br>X41_ARATH<br>Protein<br>DETOXIFICATI<br>ON 41<br>OS=Arabidopsis<br>thaliana<br>GN=DTX41<br>PE=2 SV=1 | K03327/TC.MA<br>TE,/norM, | A0A061DSU4/55<br>0/A0A061DSU4_<br>THECC Protein<br>DETOXIFICATI<br>ON<br>OS=Theobroma<br>cacao<br>GN=TCM_00190<br>5 PE=3 SV=1 | 1/1/IPR002528;<br>Multi<br>antimicrobial<br>extrusion protein                                      |                                                                                                                                                                                                                                                                                            |
| 1378<br>2264 | 1378<br>6905 | Cil_10G<br>_00537V<br>2 | NCL       | NA                                                                                                                    | K11294/NCL,/n<br>ucleolin | A0A061ELV8/34<br>1/A0A061ELV8_<br>THECC<br>Uncharacterized<br>protein<br>OS=Theobroma<br>cacao                                | 2/IPR025558;<br>Domain of<br>unknown function<br>DUF4283/IPR025<br>836; Zinc knuckle<br>CX2CX4HX4C | NA                                                                                                                                                                                                                                                                                         |







|              |              |                         |           |       |       |                                                                                                                                      |                            |                                                                                                                                                       |                                              |                                                                                                                                                                                                             |
|--------------|--------------|-------------------------|-----------|-------|-------|--------------------------------------------------------------------------------------------------------------------------------------|----------------------------|-------------------------------------------------------------------------------------------------------------------------------------------------------|----------------------------------------------|-------------------------------------------------------------------------------------------------------------------------------------------------------------------------------------------------------------|
| 2940<br>3167 | 2940<br>6167 | Cil_10G<br>_01364V<br>2 | PPI1      |       |       | O23144/339/PPI1<br>_ARATH Proton<br>pump-interactor 1<br>OS=Arabidopsis<br>thaliana GN=PPI1<br>PE=1 SV=2                             | NA                         | A0A0A0K9L8/38<br>2/A0A0A0K9L8_<br>CUCSA<br>Uncharacterized<br>protein<br>OS=Cucumis<br>sativus<br>GN=Csa_6G0946<br>80 PE=4 SV=1                       | 1/1/IPR029669;<br>Proton pump-<br>interactor | 87; hydrolase<br>activity; function<br>GO:0005783;<br>endoplasmic<br>reticulum;<br>component GO:00<br>05886; plasma<br>membrane;<br>component GO:00<br>10155; regulation<br>of proton<br>transport; process |
| 2940<br>8532 | 2941<br>2549 | Cil_10G<br>_01365V<br>2 | THF1      | 0.208 | 1.562 | Q7XAB8/289/TH<br>F1_SOLTU<br>Protein<br>THYLAKOID<br>FORMATION1,<br>chloroplastic<br>OS=Solanum<br>tuberosum<br>GN=THF1 PE=2<br>SV=1 | NA                         | A0A061E4M4/29<br>4/A0A061E4M4_<br>THECC<br>Photosystem II<br>reaction center<br>PSB29 protein<br>OS=Theobroma<br>cacao<br>GN=TCM_00792<br>9 PE=3 SV=1 | 1/1/IPR017499;<br>Protein Thf1               | GO:0010207;<br>photosystem II<br>assembly;<br>process GO:00159<br>79; photosynthesis;<br>process                                                                                                            |
| 2943<br>4901 | 2943<br>5098 | Cil_10G<br>_01366V<br>2 | USP3<br>9 |       |       | NA                                                                                                                                   | K12847/USP39,<br>/U4/U6.U5 | NA                                                                                                                                                    | NA                                           | NA                                                                                                                                                                                                          |

|              |              |                         |           |       |       |                           |                                                                                                                            |                                                                                              |                                                                                                                                            |                                                                   |
|--------------|--------------|-------------------------|-----------|-------|-------|---------------------------|----------------------------------------------------------------------------------------------------------------------------|----------------------------------------------------------------------------------------------|--------------------------------------------------------------------------------------------------------------------------------------------|-------------------------------------------------------------------|
| 2946<br>7103 | 2947<br>4023 | Cil_10G<br>_01367V<br>2 | NA        |       | NA    | NA                        | A0A0B2P9L5/82/<br>A0A0B2P9L5_G<br>LYSO<br>Uncharacterized<br>protein<br>OS=Glycine soja<br>GN=glysoja_0379<br>67 PE=4 SV=1 | 1/1/IPR022251;<br>Protein of<br>unknown function<br>wound-induced                            | NA                                                                                                                                         |                                                                   |
| 2961<br>5907 | 2961<br>6751 | Cil_10G<br>_01374V<br>2 | NA        |       | NA    | NA                        | NA                                                                                                                         | NA                                                                                           | NA                                                                                                                                         |                                                                   |
| 2962<br>0962 | 2962<br>3964 | Cil_10G<br>_01375V<br>2 | VAP<br>42 | 0.172 | 2.389 | K01681/ACO,/a<br>conitate | Q8VYN2/294/VA<br>P42_ARATH<br>Vesicle-<br>associated protein<br>4-2<br>OS=Arabidopsis<br>thaliana<br>GN=PVA42<br>PE=1 SV=1 | I3SHF4/265/I3SH<br>F4_LOTJA<br>Uncharacterized<br>protein OS=Lotus<br>japonicus PE=2<br>SV=1 | 2/IPR000535;<br>Major sperm<br>protein (MSP)<br>domain/IPR01676<br>3; Vesicle-<br>associated<br>membrane-<br>protein-associated<br>protein | GO:0005789;<br>endoplasmic<br>reticulum<br>membrane;<br>component |
| 2963<br>0040 | 2963<br>0342 | Cil_10G<br>_01376V<br>2 | NA        |       | NA    | NA                        | A0A061EBE5/10<br>57/A0A061EBE5<br>_THECC<br>Uncharacterized<br>protein<br>OS=Theobroma                                     | NA                                                                                           | NA                                                                                                                                         |                                                                   |

|              |              |                         |             |       |                                                                                                                                          |                                              |                                                                                                                            |                                                                                         |                                                                                                                          |  |
|--------------|--------------|-------------------------|-------------|-------|------------------------------------------------------------------------------------------------------------------------------------------|----------------------------------------------|----------------------------------------------------------------------------------------------------------------------------|-----------------------------------------------------------------------------------------|--------------------------------------------------------------------------------------------------------------------------|--|
|              |              |                         |             |       |                                                                                                                                          |                                              |                                                                                                                            | cacao<br>GN=TCM_01192<br>3 PE=4 SV=1                                                    |                                                                                                                          |  |
| 2966<br>7023 | 2966<br>7802 | Cil_10G<br>_01377V<br>2 | NA          |       | NA                                                                                                                                       | NA                                           | NA                                                                                                                         | NA                                                                                      | NA                                                                                                                       |  |
| 2968<br>5756 | 2970<br>9235 | Cil_10G<br>_01378V<br>2 | VPS1<br>8   |       | P59015/971/VPS<br>18_DANRE<br>Vacuolar protein<br>sorting-associated<br>protein 18<br>homolog<br>OS=Danio rerio<br>GN=vps18 PE=2<br>SV=2 | K20181/VPS18,<br>/vacuolar                   | M5WX82/985/M<br>5WX82_PRUPE<br>Uncharacterized<br>protein<br>OS=Prunus<br>persica<br>GN=PRUPE_ppa<br>000832mg PE=4<br>SV=1 | 3/IPR002885;<br>Pentatricopeptide<br>repeat/IPR007810<br>;<br>Pep3/Vps18/deep<br>orange | GO:0006886;<br>intracellular<br>protein transport;<br>process GO:00161<br>92; vesicle-<br>mediated transport;<br>process |  |
| 3250<br>0194 | 3250<br>1924 | Cil_10G<br>_01474V<br>2 | NA          |       | NA                                                                                                                                       | NA                                           | NA                                                                                                                         | NA                                                                                      | NA                                                                                                                       |  |
| 3250<br>6000 | 3250<br>7142 | Cil_10G<br>_01475V<br>2 | NA          | 0.206 | 2.547                                                                                                                                    | NA                                           | NA                                                                                                                         | NA                                                                                      | NA                                                                                                                       |  |
| 3252<br>3460 | 3253<br>5938 | Cil_10G<br>_01476V<br>2 | SCPL<br>-II |       | NA                                                                                                                                       | K16297/SCPL-<br>II/carboxypeptid<br>ase-like | NA                                                                                                                         | 1/1/IPR004252;<br>Probable<br>transposase,<br>Ptta/En/Spm,<br>plant                     | NA                                                                                                                       |  |





|      |      |         |      |                  |                  |                   |                    |                     |
|------|------|---------|------|------------------|------------------|-------------------|--------------------|---------------------|
| 4236 | 4236 | Cil_10G | EXO  | Q9FHM9/337/EX    |                  | A0A061G0K8/33     |                    | 05840; ribosome;    |
| 6719 | 7750 | _01937V | L3   | OL3_ARATH        | NA               | 8/A0A061G0K8_     |                    | component GO:00     |
|      |      | 2       |      | Protein          |                  | THECC             | 1/1/IPR006766;     | 06412; translation; |
|      |      |         |      | EXORDIUM-like    |                  | EXORDIUM like     | Phosphate-         | process             |
|      |      |         |      | 3 OS=Arabidopsis |                  | 3 OS=Theobroma    | induced protein 1  |                     |
|      |      |         |      | thaliana         |                  | cacao             |                    |                     |
|      |      |         |      | GN=EXL3 PE=2     |                  | GN=TCM_01496      |                    |                     |
|      |      |         |      | SV=1             |                  | 2 PE=4 SV=1       |                    |                     |
|      |      |         |      |                  |                  | U5CW90/85/U5C     |                    |                     |
|      |      |         |      | Q5Z9E5/84/BZR    |                  | W90_AMBTC         |                    |                     |
|      |      |         |      | 3_ORYSJ Protein  |                  | Uncharacterized   | 1/1/IPR008540;     |                     |
| 4238 | 4238 | Cil_10G | BES1 | BZR1 homolog 3   | K14503/BZR1_     | protein           | BES1/BZR1 plant    | NA                  |
| 0004 | 1574 | _01938V | /BZR | OS=Oryza sativa  | 2/resistant      | OS=Amborella      | transcription      |                     |
|      |      | 2       | 1    | subsp. japonica  |                  | trichopoda        | factor, N-terminal |                     |
|      |      |         |      | GN=BZR3 PE=2     |                  | GN=AMTR_s000      |                    |                     |
|      |      |         |      | SV=1             |                  | 59p00136790       |                    |                     |
|      |      |         |      |                  |                  | PE=4 SV=1         |                    |                     |
|      |      |         |      | Q9LE81/1164/IR   |                  | M5XM13/1198/      | 4/IPR002290;       | GO:0004672;         |
| 4238 | 4239 | Cil_10G | IRE  | E_ARATH          | K08789/MAST/     | M5XM13_PRUP       | Serine/threonine/d | protein kinase      |
| 2722 | 5408 | _01939V |      | Probable         | serine/threonine | E Uncharacterized | ual specificity    | activity;           |
|      |      | 2       |      | serine/threonine |                  | protein           | protein kinase,    | function GO:00046   |
|      |      |         |      | protein kinase   |                  | OS=Prunus         | catalytic          | 74; protein         |



|       |      |      |         |                 |              |                |                   |                    |
|-------|------|------|---------|-----------------|--------------|----------------|-------------------|--------------------|
|       |      |      |         | IRE             |              | persica        | domain/IPR00827   | serine/threonine   |
|       |      |      |         | OS=Arabidopsis  |              | GN=PRUPE_ppa   | 1;                | kinase activity;   |
|       |      |      |         | thaliana GN=IRE |              | 000414mg PE=4  | Serine/threonine- | function GO:00055  |
|       |      |      |         | PE=2 SV=1       |              | SV=1           | protein kinase,   | 24; ATP binding;   |
|       |      |      |         |                 |              |                | active site       | function GO:00064  |
|       |      |      |         |                 |              |                |                   | 68; protein        |
|       |      |      |         |                 |              |                |                   | phosphorylation;   |
|       |      |      |         |                 |              |                |                   | process            |
|       |      |      |         | Q50EX6/271/OD   |              | V5K8K7/249/V5  |                   |                    |
|       |      |      |         | O1_PETHY        |              | K8K7_9ROSI     |                   |                    |
|       |      |      |         | Protein         |              | MYB            |                   |                    |
|       | 4239 | 4239 | Cil_10G | ODORANT1        | K09422/MYBP/ | transcription  | 2/IPR001005;      |                    |
|       | 7748 | 9441 | _01940V | OS=Petunia      | factor       | factor 2       | SANT/Myb          | NA                 |
|       |      |      | 2       | hybrida         |              | OS=Betula      | domain/IPR01793   |                    |
|       |      |      |         | GN=ODO1 PE=2    |              | luminifera     | 0; Myb domain     |                    |
|       |      |      |         | SV=1            |              | GN=MYB2 PE=2   |                   |                    |
|       |      |      |         |                 |              | SV=1           |                   |                    |
|       |      |      |         | Q9M9S6/330/UT   |              | A0A061EBJ3/330 |                   |                    |
|       |      |      |         | R3_ARATH        |              | /A0A061EBJ3_T  |                   |                    |
|       |      |      |         | UDP-            |              | HECC UDP-      |                   |                    |
| chr11 | 1640 | 1640 | Cil_11G | galactose/UDP-  | K15275/SLC35 | galactose      | 1/1/IPR013657;    | GO:0055085;        |
|       | 1106 | 4803 | _01297V | glucose         | B1/carrier   | transporter 3  | UAA transporter   | transmembrane      |
|       |      |      | 2       | transporter 3   |              | isoform 1      |                   | transport; process |
|       |      |      |         | OS=Arabidopsis  |              | OS=Theobroma   |                   |                    |
|       |      |      |         | thaliana        |              | cacao          |                   |                    |



|      |      |         |       |    |    |                 |                    |                      |
|------|------|---------|-------|----|----|-----------------|--------------------|----------------------|
| 1656 | 1656 | Cil_11G |       |    |    | trichocarpa     | beta-propeller     |                      |
| 4754 | 5020 | _01301V | NA    | NA | NA | GN=POPTR_001    | repeat             |                      |
|      |      | 2       |       |    |    | 6s14620g PE=4   |                    |                      |
|      |      |         |       |    |    | SV=1            |                    |                      |
|      |      |         |       |    |    |                 |                    | GO:0004672;          |
|      |      |         |       |    |    |                 |                    | protein kinase       |
|      |      |         |       |    |    |                 |                    | activity;            |
|      |      |         |       |    |    |                 |                    | function GO:00047    |
|      |      |         |       |    |    |                 |                    | 15; non-membrane     |
|      |      |         |       |    |    |                 |                    | spanning protein     |
|      |      |         |       |    |    |                 |                    | tyrosine kinase      |
|      |      |         |       |    |    |                 |                    | activity;            |
|      |      |         |       |    |    |                 |                    | function GO:00055    |
| 1657 | 1657 | Cil_11G | E2.7. |    |    | A0A059BG47/73   | 3/IPR001245;       |                      |
| 2998 | 5893 | _01302V | 1.-   |    |    | 5/A0A059BG47_   | Serine-            |                      |
|      |      | 2       | /2.7  |    |    | EUCGR           | threonine/tyrosine |                      |
|      |      |         |       |    |    | Uncharacterized | -protein kinase    |                      |
|      |      |         |       |    |    | protein         | catalytic          |                      |
|      |      |         |       |    |    | OS=Eucalyptus   | domain/IPR01625    |                      |
|      |      |         |       |    |    | grandis         | 1; Tyrosine-       |                      |
|      |      |         |       |    |    | GN=EUGRSUZ_     | protein kinase,    |                      |
|      |      |         |       |    |    | G02533 PE=4     | non-receptor       |                      |
|      |      |         |       |    |    | SV=1            | Jak/Tyk2           |                      |
|      |      |         |       |    |    |                 |                    | phosphorylation;     |
|      |      |         |       |    |    |                 |                    | process GO:00160     |
|      |      |         |       |    |    |                 |                    | 20; membrane;        |
|      |      |         |       |    |    |                 |                    | component GO:00      |
|      |      |         |       |    |    |                 |                    | 35556;               |
|      |      |         |       |    |    |                 |                    | intracellular signal |



|      |      |         |      |                                                                         |                                   |                                             |                                                                                    |                                                                                                                                   |                                                                              |
|------|------|---------|------|-------------------------------------------------------------------------|-----------------------------------|---------------------------------------------|------------------------------------------------------------------------------------|-----------------------------------------------------------------------------------------------------------------------------------|------------------------------------------------------------------------------|
| 1742 | 1742 | Cil_11G | PPR1 | Q0WVK7/734/PP                                                           |                                   |                                             |                                                                                    |                                                                                                                                   |                                                                              |
| 4962 | 7217 | _01346V | 2    | R12_ARATH                                                               |                                   |                                             | F6HPH4/748/F6H                                                                     |                                                                                                                                   |                                                                              |
|      |      |         |      | Pentatricopeptide repeat-containing protein                             |                                   |                                             | PH4_VITVI                                                                          | 2/IPR000048; IQ motif, EF-hand binding site/IPR002885; Pentatricopeptide repeat                                                   | GO:0005515; protein binding; function                                        |
|      |      |         |      | At1g05670, mitochondrial OS=Arabidopsis thaliana GN=At1g05670 PE=2 SV=1 | K17710/PTCD1 /repeat              |                                             | Putative uncharacterized protein OS=Vitis vinifera GN=VIT_01s002 6g01280 PE=4 SV=1 |                                                                                                                                   |                                                                              |
| 1745 | 1746 | Cil_11G | IRAK |                                                                         |                                   |                                             |                                                                                    |                                                                                                                                   |                                                                              |
| 3084 | 0970 | _01347V | 4    | NA                                                                      |                                   |                                             | F6HPH5/292/F6H                                                                     | 2/IPR025287; Wall-associated receptor kinase, galacturonan-binding domain/IPR03287 2; Wall-associated receptor kinase, C-terminal | GO:0030247; polysaccharide binding; function                                 |
|      |      |         |      |                                                                         | K04733/IRAK4 /receptor-associated |                                             | Putative uncharacterized protein OS=Vitis vinifera GN=VIT_01s002 6g01250 PE=4 SV=1 |                                                                                                                                   |                                                                              |
| 1746 | 1747 | Cil_11G | B3G  | Q8RX55/622/B3                                                           |                                   |                                             | A5AJ66/628/A5A                                                                     | 2/IPR001079; Galectin, carbohydrate recognition domain/IPR00265 9; Glycosyl                                                       | GO:0006486; protein glycosylation; process GO:0008378; galactosyltransferase |
| 7017 | 1548 | _01348V | TI   | GTI_ARATH                                                               | K20843/GALT2                      | S/O-galactosyltransferase 18 OS=Arabidopsis | J66_VITVI                                                                          | Putative uncharacterized protein OS=Vitis vinifera                                                                                |                                                                              |

|              |              |                         |           |                                                                                                                                         |                    |                                                                                                                                                                                                                                                                               |                                                                |                                                                                                                                |
|--------------|--------------|-------------------------|-----------|-----------------------------------------------------------------------------------------------------------------------------------------|--------------------|-------------------------------------------------------------------------------------------------------------------------------------------------------------------------------------------------------------------------------------------------------------------------------|----------------------------------------------------------------|--------------------------------------------------------------------------------------------------------------------------------|
|              |              |                         |           | thaliana<br>GN=B3GALT18<br>PE=2 SV=1                                                                                                    |                    | GN=VITISV_023<br>073 PE=4 SV=1                                                                                                                                                                                                                                                | transferase,<br>family 31                                      | se activity;<br>function GO:00160<br>20; membrane;<br>component GO:00<br>30246;<br>carbohydrate<br>binding; function           |
| 1749<br>0651 | 1749<br>2692 | Cil_11G<br>_01349V<br>2 | GPA<br>T6 | O80437/494/GPA<br>T6_ARATH<br>Glycerol-3-<br>phosphate 2-O-<br>acyltransferase 6<br>OS=Arabidopsis<br>thaliana<br>GN=GPAT6<br>PE=1 SV=1 | K13508/GPAT/<br>-- | B9IIF1/501/B9IIF<br>1_POPTR<br>Uncharacterized<br>protein<br>OS=Populus<br>trichocarpa<br>GN=POPTR_001<br>6s06390g PE=4<br>SV=2<br>V4SP43/96/V4SP<br>43_9ROSI<br>Uncharacterized<br>protein<br>(Fragment)<br>OS=Citrus<br>clementina<br>GN=CICLE_v100<br>33320mg PE=4<br>SV=1 | 1/1/IPR002123;<br>Phospholipid/glyc<br>erol<br>acyltransferase | GO:0008152;<br>metabolic process;<br>process GO:00167<br>46; transferase<br>activity,<br>transferring acyl<br>groups; function |
| 1749<br>6404 | 1750<br>6386 | Cil_11G<br>_01350V<br>2 | NA        | NA                                                                                                                                      | NA                 | NA                                                                                                                                                                                                                                                                            | NA                                                             | NA                                                                                                                             |

|              |              |                         |                   |       |       |    |                                                                                                                                           |                                       |                                                                                                                                      |                                                                                                 |                                                                                                                                         |
|--------------|--------------|-------------------------|-------------------|-------|-------|----|-------------------------------------------------------------------------------------------------------------------------------------------|---------------------------------------|--------------------------------------------------------------------------------------------------------------------------------------|-------------------------------------------------------------------------------------------------|-----------------------------------------------------------------------------------------------------------------------------------------|
| 1771<br>1650 | 1771<br>8316 | Cil_11G<br>_01353V<br>2 | LRR<br>C8         |       |       |    | Q40392/899/TM<br>VRN_NICGU<br>TMV resistance<br>protein N<br>OS=Nicotiana<br>glutinosa GN=N<br>PE=1 SV=1                                  | K22038/LRRC8<br>/anion                | M5XSP1/1372/M<br>5XSP1_PRUPE<br>Uncharacterized<br>protein<br>OS=Prunus<br>persica<br>GN=PRUPE_ppa<br>000268mg PE=4<br>SV=1          | 4/IPR002182;<br>NB-<br>ARC/IPR003591;<br>Leucine-rich<br>repeat, typical<br>subtype             | GO:0005515;<br>protein binding;<br>function GO:00071<br>65; signal<br>transduction;<br>process GO:00435<br>31; ADP binding;<br>function |
| 1774<br>6173 | 1775<br>1821 | Cil_11G<br>_01354V<br>2 | LOX<br>1          | 0.230 | 1.988 | NA | NA                                                                                                                                        | K15718/LOX1_<br>5/9S-<br>lipoxygenase | M0TLR3/420/M0<br>TLR3_MUSAM<br>Uncharacterized<br>protein OS=Musa<br>acuminata subsp.<br>malaccensis PE=4<br>SV=1                    | NA                                                                                              | NA                                                                                                                                      |
| 1777<br>6014 | 1778<br>2799 | Cil_11G<br>_01355V<br>2 | SNC1<br>/ERN<br>1 |       |       |    | O23530/1060/SN<br>C1_ARATH<br>Protein<br>SUPPRESSOR<br>OF npr1-1,<br>CONSTITUTIVE<br>1 OS=Arabidopsis<br>thaliana<br>GN=SNC1 PE=1<br>SV=4 | K08852/ERN1/-                         | F6HPI4/1404/F6<br>HPI4_VITVI<br>Putative<br>uncharacterized<br>protein OS=Vitis<br>vinifera<br>GN=VIT_01s002<br>6g01120 PE=4<br>SV=1 | 4/IPR003591;<br>Leucine-rich<br>repeat, typical<br>subtype/IPR0035<br>93; AAA+<br>ATPase domain | GO:0005515;<br>protein binding;<br>function GO:00071<br>65; signal<br>transduction;<br>process GO:00435<br>31; ADP binding;<br>function |

|              |              |                         |      |       |       |    |  |                                                                                                                      |                              |                                                                                                                                       |                                                                                                                                                              |                                                                                                                                                                                        |
|--------------|--------------|-------------------------|------|-------|-------|----|--|----------------------------------------------------------------------------------------------------------------------|------------------------------|---------------------------------------------------------------------------------------------------------------------------------------|--------------------------------------------------------------------------------------------------------------------------------------------------------------|----------------------------------------------------------------------------------------------------------------------------------------------------------------------------------------|
| 2311<br>0482 | 2311<br>9361 | Cil_11G<br>_01521V<br>2 | PTR2 |       |       |    |  | P46032/570/PTR<br>2_ARATH<br>Protein NRT1/<br>PTR FAMILY 8.3<br>OS=Arabidopsis<br>thaliana<br>GN=NPF8.3<br>PE=1 SV=1 | K14638/SLC15<br>A3_4,/solute | A0A061EA41/57<br>0/A0A061EA41_<br>THECC Peptide<br>transporter 2<br>isoform 1<br>OS=Theobroma<br>cacao<br>GN=TCM_01117<br>3 PE=3 SV=1 | 2/IPR000109;<br>Proton-dependent<br>oligopeptide<br>transporter<br>family/IPR01845<br>6; PTR2 family<br>proton/oligopepti<br>de symporter,<br>conserved site | GO:0005215;<br>transporter<br>activity;<br>function GO:00068<br>10; transport;<br>process GO:00068<br>57; oligopeptide<br>transport;<br>process GO:00160<br>20; membrane;<br>component |
| 2315<br>4223 | 2315<br>4567 | Cil_11G<br>_01522V<br>2 | RRP5 | 0.162 | 1.527 | NA |  |                                                                                                                      | K14792/RRP5/<br>rRNA         | NA                                                                                                                                    | NA                                                                                                                                                           | NA                                                                                                                                                                                     |
| 2319<br>0999 | 2319<br>6615 | Cil_11G<br>_01523V<br>2 | PTR2 |       |       |    |  | P46032/584/PTR<br>2_ARATH<br>Protein NRT1/<br>PTR FAMILY 8.3<br>OS=Arabidopsis<br>thaliana<br>GN=NPF8.3<br>PE=1 SV=1 | K14638/SLC15<br>A3_4,/solute | A0A061EA41/58<br>3/A0A061EA41_<br>THECC Peptide<br>transporter 2<br>isoform 1<br>OS=Theobroma<br>cacao<br>GN=TCM_01117<br>3 PE=3 SV=1 | 2/IPR000109;<br>Proton-dependent<br>oligopeptide<br>transporter<br>family/IPR01845<br>6; PTR2 family<br>proton/oligopepti<br>de symporter,<br>conserved site | GO:0005215;<br>transporter<br>activity;<br>function GO:00068<br>10; transport;<br>process GO:00068<br>57; oligopeptide<br>transport;<br>process GO:00160<br>20; membrane;<br>component |



|              |              |                         |                   |       |       |                                                                                                        |                             |                                                                                                                                                                                                                                                                                                                                                                                               |                                                                                 |                                                                                                                           |
|--------------|--------------|-------------------------|-------------------|-------|-------|--------------------------------------------------------------------------------------------------------|-----------------------------|-----------------------------------------------------------------------------------------------------------------------------------------------------------------------------------------------------------------------------------------------------------------------------------------------------------------------------------------------------------------------------------------------|---------------------------------------------------------------------------------|---------------------------------------------------------------------------------------------------------------------------|
| 2323<br>4314 | 2324<br>1077 | Cil_11G<br>_01524V<br>2 | NA                | 0.204 | 1.767 | NA                                                                                                     | NA                          | D7SMG7/226/D7<br>SMG7_VITVI<br>Putative<br>uncharacterized<br>protein OS=Vitis<br>vinifera<br>GN=VIT_01s013<br>7g00060 PE=4<br>SV=1<br>S8D5C6/767/S8D<br>5C6_9LAMI<br>Uncharacterized<br>protein<br>(Fragment)<br>OS=Genlisea<br>aurea<br>GN=M569_02121<br>PE=4 SV=1<br>M0TWQ5/140/M<br>0TWQ5_MUSA<br>M<br>Uncharacterized<br>protein OS=Musa<br>acuminata subsp.<br>malaccensis PE=4<br>SV=1 | NA                                                                              | NA                                                                                                                        |
| 2841<br>3279 | 2841<br>7965 | Cil_11G<br>_01686V<br>2 | SMC<br>6          | 0.174 | 1.844 | NA                                                                                                     | K22804/SMC6/<br>maintenance | protein<br>(Fragment)<br>OS=Genlisea<br>aurea<br>GN=M569_02121<br>PE=4 SV=1<br>M0TWQ5/140/M<br>0TWQ5_MUSA<br>M<br>Uncharacterized<br>protein OS=Musa<br>acuminata subsp.<br>malaccensis PE=4<br>SV=1                                                                                                                                                                                          | 1/1/IPR025836;<br>Zinc knuckle<br>CX2CX4HX4C                                    | NA                                                                                                                        |
| 2843<br>5290 | 2846<br>6439 | Cil_11G<br>_01687V<br>2 | FHY<br>3/FA<br>R1 |       |       | Q9LIE5/661/FHY<br>3_ARATH<br>Protein FAR-RED<br>ELONGATED<br>HYPOCOTYL 3<br>OS=Arabidopsis<br>thaliana | K17604/ZSWI<br>M3/finger    | Uncharacterized<br>protein OS=Musa<br>acuminata subsp.<br>malaccensis PE=4<br>SV=1                                                                                                                                                                                                                                                                                                            | 3/IPR007527;<br>Zinc finger,<br>SWIM-<br>type/IPR031052;<br>FHY3/FAR1<br>family | GO:0006355;<br>regulation of<br>transcription,<br>DNA-templated;<br>process GO:00082<br>70; zinc ion<br>binding; function |





|              |              |                         |      |                                                                                                                                                                                                                                                                                                      |                                |                                                                                                                                                                                                                                                                                                                                                                                                    |                                                      |                                                                                                                            |
|--------------|--------------|-------------------------|------|------------------------------------------------------------------------------------------------------------------------------------------------------------------------------------------------------------------------------------------------------------------------------------------------------|--------------------------------|----------------------------------------------------------------------------------------------------------------------------------------------------------------------------------------------------------------------------------------------------------------------------------------------------------------------------------------------------------------------------------------------------|------------------------------------------------------|----------------------------------------------------------------------------------------------------------------------------|
| 3033<br>0028 | 3033<br>4544 | Cil_11G<br>_01768V<br>2 | DYL  | thaliana<br>GN=MED23<br>PE=1 SV=1<br><br>Q86A88/89/DYL<br>_DICDI Dynein<br>light chain,<br>cytoplasmic<br>OS=Dictyosteliu<br>m discoideum<br>GN=dlcB PE=3<br>SV=1<br><br>Q9LQU4/152/PC<br>R2_ARATH<br>Protein PLANT<br>CADMIUM<br>RESISTANCE 2<br>OS=Arabidopsis<br>thaliana<br>GN=PCR2 PE=1<br>SV=1 | K10418/DYNL<br>L/light         | GN=EUGRSUZ_<br>B02949 PE=4<br>SV=1<br>A0A061E8U7/12<br>8/A0A061E8U7_<br>THECC Dynein<br>light chain type 1<br>family protein<br>OS=Theobroma<br>cacao<br>GN=TCM_01101<br>2 PE=4 SV=1<br>B9HW36/193/B9<br>HW36_POPTR<br>Uncharacterized<br>protein<br>OS=Populus<br>trichocarpa<br>GN=POPTR_001<br>0s11910g PE=4<br>SV=1<br>B9HW36/193/B9<br>HW36_POPTR<br>Uncharacterized<br>protein<br>OS=Populus | 1/1/IPR001372;<br>Dynein light<br>chain, type 1/2    | GO:0005875;<br>microtubule<br>associated<br>complex;<br>component GO:00<br>07017;<br>microtubule-based<br>process; process |
| 3035<br>0760 | 3035<br>3867 | Cil_11G<br>_01769V<br>2 | PCR2 | thaliana<br>GN=PCR2 PE=1<br>SV=1<br><br>Q9LQU4/152/PC<br>R2_ARATH<br>Protein PLANT<br>CADMIUM<br>RESISTANCE 2                                                                                                                                                                                        | NA                             | GN=POPTR_001<br>0s11910g PE=4<br>SV=1<br>B9HW36/193/B9<br>HW36_POPTR<br>Uncharacterized<br>protein<br>OS=Populus                                                                                                                                                                                                                                                                                   | 1/1/IPR006461;<br>PLAC8 motif-<br>containing protein | NA                                                                                                                         |
| 3035<br>6989 | 3035<br>8191 | Cil_11G<br>_01770V<br>2 | PCR2 | thaliana<br>GN=PCR2 PE=1<br>SV=1<br><br>Q9LQU4/152/PC<br>R2_ARATH<br>Protein PLANT<br>CADMIUM<br>RESISTANCE 2                                                                                                                                                                                        | K11153/RDH12<br>/dehydrogenase | GN=POPTR_001<br>0s11910g PE=4<br>SV=1<br>B9HW36/193/B9<br>HW36_POPTR<br>Uncharacterized<br>protein<br>OS=Populus                                                                                                                                                                                                                                                                                   | 1/1/IPR006461;<br>PLAC8 motif-<br>containing protein | NA                                                                                                                         |



GN=PXC2 PE=2  
SV=1

|      |      |         |      |    |                |                   |                   |    |                   |
|------|------|---------|------|----|----------------|-------------------|-------------------|----|-------------------|
| 1755 | 1759 | Cil_12G | SH3  |    |                |                   | A0A061E1V8/56     |    |                   |
| 276  | 187  | _00093V | YL1  | NA | K20523/SH3YL   | ubiquitin-protein | 6/A0A061E1V8_     |    |                   |
|      |      | 2       |      |    | 1/domain-      | ligase RNF25      | THECC E3          | NA | NA                |
|      |      |         |      |    | containing     | OS=Theobroma      |                   |    |                   |
|      |      |         |      |    |                | cacao             |                   |    |                   |
|      |      |         |      |    |                | GN=TCM_00765      |                   |    |                   |
|      |      |         |      |    |                | 7 PE=4 SV=1       |                   |    |                   |
|      |      |         |      |    | P08770/376/TRA | D0UIX2/259/D0     |                   |    |                   |
|      |      |         |      |    | 1_MAIZE        | UIX2_CUCME        |                   |    |                   |
| 1777 | 1785 | Cil_12G | TRA  |    |                | Putative          |                   |    |                   |
| 767  | 080  | _00094V | 1    | NA | NA             | transposase       | NA                | NA | NA                |
|      |      | 2       |      |    | OS=Zea mays    | OS=Cucumis        |                   |    |                   |
|      |      |         |      |    | PE=2 SV=2      | melo PE=4 SV=1    |                   |    |                   |
|      |      |         |      |    | Q5ZKL5/400/PP  | M5XB32/492/M5     |                   |    |                   |
|      |      |         |      |    | CEL_CHICK      | XB32_PRUPE        | 2/IPR002470;      |    | GO:0004252;       |
|      |      |         |      |    | Prolyl         | Uncharacterized   | Peptidase S9A,    |    | serine-type       |
|      |      |         |      |    | endopeptidase- | protein           | prolyl            |    | endopeptidase     |
| 1785 | 1789 | Cil_12G | PPCE |    |                | OS=Prunus         | oligopeptidase/IP |    | activity;         |
| 881  | 813  | _00095V | L/PT |    | K01354/ptrB/B  | persica           | R023302;          |    | function GO:00065 |
|      |      | 2       | RB   |    |                | GN=PRUPE_ppa      | Peptidase S9A, N- |    | 08; proteolysis;  |
|      |      |         |      |    |                | 001738mg PE=4     | terminal domain   |    | process GO:00700  |
|      |      |         |      |    |                | SV=1              |                   |    | 08; serine-type   |



|              |              |                         |            |                                                                                                                                              |                                       |                                                                                                                                                          |                                                             |                                                                                              |
|--------------|--------------|-------------------------|------------|----------------------------------------------------------------------------------------------------------------------------------------------|---------------------------------------|----------------------------------------------------------------------------------------------------------------------------------------------------------|-------------------------------------------------------------|----------------------------------------------------------------------------------------------|
| 1021<br>7434 | 1022<br>0102 | Cil_12G<br>_00573V<br>2 | SDH<br>5   | Q9SX77/257/SD<br>H5_ARATH<br>Succinate<br>dehydrogenase<br>subunit 5,<br>mitochondrial<br>OS=Arabidopsis<br>thaliana<br>GN=SDH5 PE=1<br>SV=1 | NA                                    | 2s12930g PE=4<br>SV=1<br>A0A0A0LP60/24<br>1/A0A0A0LP60_<br>CUCSA<br>Uncharacterized<br>protein<br>OS=Cucumis<br>sativus<br>GN=Csa_2G3600<br>50 PE=4 SV=1 | 1/1/IPR025397;<br>Protein of<br>unknown function<br>DUF4370 | NA                                                                                           |
| 1022<br>8960 | 1023<br>2664 | Cil_12G<br>_00574V<br>2 | HID<br>H   | Q5NUF3/240/HI<br>DH_SOYBN 2-<br>hydroxyisoflavan<br>one dehydratase<br>OS=Glycine max<br>GN=HIDH PE=1<br>SV=1                                | K20506/TCEA/<br>A-converting          | A0A061FC92/32<br>4/A0A061FC92_<br>THECC<br>Alpha/beta-<br>Hydrolases<br>superfamily<br>protein<br>OS=Theobroma<br>cacao<br>GN=TCM_03387<br>8 PE=4 SV=1   | 1/1/IPR013094;<br>Alpha/beta<br>hydrolase fold-3            | GO:0008152;<br>metabolic process;<br>process GO:00167<br>87; hydrolase<br>activity; function |
| 1023<br>4961 | 1023<br>8696 | Cil_12G<br>_00575V<br>2 | PTG<br>ES3 | Q6ID70/150/Y33<br>77_ARATH<br>Uncharacterized                                                                                                | K15730/PTGES<br>3/prostaglandin-<br>E | C6T4G0/150/C6T<br>4G0_SOYBN<br>Uncharacterized                                                                                                           | 1/1/IPR007052;<br>CS domain                                 | NA                                                                                           |



|              |              |                         |          |                                                                                                                   |                              |                                                                                                                                           |                                                        |                                                                                              |
|--------------|--------------|-------------------------|----------|-------------------------------------------------------------------------------------------------------------------|------------------------------|-------------------------------------------------------------------------------------------------------------------------------------------|--------------------------------------------------------|----------------------------------------------------------------------------------------------|
|              |              |                         |          | protein<br>At3g03773<br>OS=Arabidopsis<br>thaliana<br>GN=At3g03773<br>PE=1 SV=1                                   |                              | protein<br>OS=Glycine max<br>PE=2 SV=1                                                                                                    |                                                        |                                                                                              |
|              |              |                         |          | Q9SX78/311/CX<br>E2_ARATH<br>Probable<br>carboxylesterase 2<br>OS=Arabidopsis<br>thaliana<br>GN=CXE2 PE=2<br>SV=1 | K20506/TCEA/<br>A-converting | A0A0D2RIU8/32<br>0/A0A0D2RIU8_<br>GOSRA<br>Uncharacterized<br>protein<br>OS=Gossypium<br>raimondii<br>GN=B456_005G1<br>03700 PE=4<br>SV=1 | 1/1/IPR013094;<br>Alpha/beta<br>hydrolase fold-3       | GO:0008152;<br>metabolic process;<br>process GO:00167<br>87; hydrolase<br>activity; function |
| 1024<br>8171 | 1024<br>9151 | Cil_12G<br>_00576V<br>2 | CXE<br>2 | O48723/403/PLP<br>2_ARATH<br>Patatin-like<br>protein 2<br>OS=Arabidopsis<br>thaliana<br>GN=PLP2 PE=1<br>SV=1      | K06900/K0690<br>0/protein    | F6H012/406/F6H<br>012_VITVI<br>Patatin OS=Vitis<br>vinifera<br>GN=VIT_18s000<br>1g10910 PE=3<br>SV=1                                      | 1/1/IPR002641;<br>Patatin/Phospholi<br>pase A2-related | GO:0006629; lipid<br>metabolic process;<br>process                                           |
| 1028<br>2602 | 1028<br>4705 | Cil_12G<br>_00577V<br>2 | PLP2     |                                                                                                                   |                              |                                                                                                                                           |                                                        |                                                                                              |





|       |            |            |                         |                    |       |       |                                                                                                                 |                           |                                                                                                                       |                                                                                                                                        |                                                                                                                                                                                                                                                                                                                                                                                                 |
|-------|------------|------------|-------------------------|--------------------|-------|-------|-----------------------------------------------------------------------------------------------------------------|---------------------------|-----------------------------------------------------------------------------------------------------------------------|----------------------------------------------------------------------------------------------------------------------------------------|-------------------------------------------------------------------------------------------------------------------------------------------------------------------------------------------------------------------------------------------------------------------------------------------------------------------------------------------------------------------------------------------------|
| chr15 | 2995<br>03 | 3049<br>46 | Cil_15G<br>_00015V<br>2 | GLR<br>36/G<br>RIP | 0.174 | 1.623 | Q84W41/895/GL<br>R36_ARATH<br>Glutamate<br>receptor 3.6<br>OS=Arabidopsis<br>thaliana<br>GN=GLR3.6<br>PE=2 SV=1 | K05387/GRIP/r<br>eceptor, | M5WEL2/935/M<br>5WEL2_PRUPE<br>Glutamate<br>receptor<br>OS=Prunus<br>persica<br>GN=PRUPE_ppa<br>000995mg PE=3<br>SV=1 | 3/IPR001638;<br>Solute-binding<br>protein family<br>3/N-terminal<br>domain of<br>MltF/IPR001828;<br>Receptor, ligand<br>binding region | reticulum<br>targeting;<br>component GO:00<br>06614; SRP-<br>dependent<br>cotranslational<br>protein targeting to<br>membrane;<br>process GO:00083<br>12; 7S RNA<br>binding;<br>function GO:00309<br>42; endoplasmic<br>reticulum signal<br>peptide binding;<br>function<br><br>GO:0004970;<br>ionotropic<br>glutamate receptor<br>activity;<br>function GO:00160<br>20; membrane;<br>component |
|-------|------------|------------|-------------------------|--------------------|-------|-------|-----------------------------------------------------------------------------------------------------------------|---------------------------|-----------------------------------------------------------------------------------------------------------------------|----------------------------------------------------------------------------------------------------------------------------------------|-------------------------------------------------------------------------------------------------------------------------------------------------------------------------------------------------------------------------------------------------------------------------------------------------------------------------------------------------------------------------------------------------|

|      |      |                 |            |                                                                                                       |                       |                                                                                                           |                                                                                                                            |                                                                                                                                                                     |
|------|------|-----------------|------------|-------------------------------------------------------------------------------------------------------|-----------------------|-----------------------------------------------------------------------------------------------------------|----------------------------------------------------------------------------------------------------------------------------|---------------------------------------------------------------------------------------------------------------------------------------------------------------------|
| 3069 | 3109 | Cil_15G_00016V2 | GLR36/GRIP | Q84W41/903/GLR36_ARATH<br>Glutamate receptor 3.6<br>OS=Arabidopsis thaliana<br>GN=GLR3.6<br>PE=2 SV=1 | K05387/GRIP/receptor, | W9RW17/1006/W9RW17_9ROS<br>A Glutamate receptor 3.6<br>OS=Morus notabilis<br>GN=L484_00706<br>2 PE=4 SV=1 | 3/IPR001638;<br>Solute-binding protein family<br>3/N-terminal domain of MltF/IPR001828;<br>Receptor, ligand binding region | GO:0004970;<br>ionotropic glutamate receptor activity;<br>function GO:0016020; membrane; component                                                                  |
| 3224 | 3260 | Cil_15G_00017V2 | GLR36/GRIP | Q84W41/901/GLR36_ARATH<br>Glutamate receptor 3.6<br>OS=Arabidopsis thaliana<br>GN=GLR3.6<br>PE=2 SV=1 | K05387/GRIP/receptor, | D7SWB7/921/D7SWB7_VITVI<br>Glutamate receptor OS=Vitis vinifera<br>GN=VIT_07s003<br>1g02170 PE=3 SV=1     | 3/IPR001638;<br>Solute-binding protein family<br>3/N-terminal domain of MltF/IPR001828;<br>Receptor, ligand binding region | GO:0004970;<br>ionotropic glutamate receptor activity;<br>function GO:0016020; membrane; component                                                                  |
| 3333 | 3367 | Cil_15G_00018V2 | GLR36/GRIP | Q84W41/901/GLR36_ARATH<br>Glutamate receptor 3.6<br>OS=Arabidopsis thaliana<br>GN=GLR3.6<br>PE=2 SV=1 | K05387/GRIP/receptor, | W9RW17/995/W9RW17_9ROSA<br>Glutamate receptor 3.6<br>OS=Morus notabilis<br>GN=L484_00706<br>2 PE=4 SV=1   | 4/IPR001638;<br>Solute-binding protein family<br>3/N-terminal domain of MltF/IPR001828;<br>Receptor, ligand binding region | GO:0004930; G-protein coupled receptor activity;<br>function GO:0004970; ionotropic glutamate receptor activity;<br>function GO:0007186; G-protein coupled receptor |

|      |      |                 |            |       |       |  |                                                                                                                                                                                                                   |                       |                                                                                                                                                                                                                              |                                                                                                                                                                                               |                                                                                                                                                                                                                        |  |
|------|------|-----------------|------------|-------|-------|--|-------------------------------------------------------------------------------------------------------------------------------------------------------------------------------------------------------------------|-----------------------|------------------------------------------------------------------------------------------------------------------------------------------------------------------------------------------------------------------------------|-----------------------------------------------------------------------------------------------------------------------------------------------------------------------------------------------|------------------------------------------------------------------------------------------------------------------------------------------------------------------------------------------------------------------------|--|
| 3581 | 3719 | Cil_15G_00019V2 | GLR36/GRIP |       |       |  | Q84W41/901/GLR36_ARATH<br>Glutamate receptor 3.6<br>OS=Arabidopsis thaliana<br>GN=GLR3.6<br>PE=2 SV=1<br>Q9GZT6/252/CC90B_HUMAN<br>Coiled-coil domain-containing protein 90B,<br>mitochondrial<br>OS=Homo sapiens | K05387/GRIP/receptor, | W9RW17/1001/W9RW17_9ROS<br>A Glutamate receptor 3.6<br>OS=Morus notabilis<br>GN=L484_007062<br>PE=4 SV=1<br>A0A0A0KZG0/258/A0A0A0KZG0_CUCSA<br>Uncharacterized protein<br>OS=Cucumis sativus<br>GN=Csa_4G043920<br>PE=4 SV=1 | 3/IPR001638;<br>Solute-binding protein family<br>3/N-terminal domain of MltF/IPR001828;<br>Receptor, ligand binding region<br>1/1/IPR024461;<br>Coiled-coil domain-containing protein 90-like | signaling pathway; process GO:0016020; membrane; component GO:0016021; integral component of membrane; component<br>GO:0004970; ionotropic glutamate receptor activity; function GO:0016020; membrane; component<br>NA |  |
| 8951 | 8958 | Cil_15G_00555V2 | CC90B      | 0.166 | 1.842 |  |                                                                                                                                                                                                                   | K22137/MCUR1/calcium  |                                                                                                                                                                                                                              |                                                                                                                                                                                               |                                                                                                                                                                                                                        |  |

|             |             |                         |          |  |                                                                                                                                                                                  |                                                                                                                                     |                                                            |    |    |
|-------------|-------------|-------------------------|----------|--|----------------------------------------------------------------------------------------------------------------------------------------------------------------------------------|-------------------------------------------------------------------------------------------------------------------------------------|------------------------------------------------------------|----|----|
|             |             |                         |          |  | GN=CCDC90B<br>PE=1 SV=2                                                                                                                                                          |                                                                                                                                     |                                                            |    |    |
| 8951<br>673 | 8952<br>582 | Cil_15G<br>_00556V<br>2 | NA       |  | NA                                                                                                                                                                               | NA                                                                                                                                  | NA                                                         | NA | NA |
|             |             |                         |          |  |                                                                                                                                                                                  | B9HFD2/234/B9<br>HFD2_POPTR<br>Uncharacterized<br>protein<br>OS=Populus<br>trichocarpa<br>GN=POPTR_000<br>7s13740g PE=4<br>SV=1     |                                                            |    |    |
| 8973<br>404 | 8975<br>815 | Cil_15G<br>_00557V<br>2 | NA       |  | NA                                                                                                                                                                               | NA                                                                                                                                  | NA                                                         | NA | NA |
|             |             |                         |          |  | O14244/686/YEL<br>D_SCHPO<br>Uncharacterized<br>membrane protein<br>C6F6.13c<br>OS=Schizosaccha<br>romyces pombe<br>(strain 972 /<br>ATCC 24843)<br>GN=SPAC6F6.13<br>c PE=3 SV=1 |                                                                                                                                     |                                                            |    |    |
| 8977<br>627 | 8985<br>683 | Cil_15G<br>_00558V<br>2 | YEL<br>D |  | K14773/UTP23/<br>small                                                                                                                                                           | A0A067FUS2/65<br>8/A0A067FUS2_<br>CITSI<br>Uncharacterized<br>protein OS=Citrus<br>sinensis<br>GN=CISIN_1g00<br>6082mg PE=4<br>SV=1 | 1/1/IPR007941;<br>Protein of<br>unknown function<br>DUF726 |    | NA |

|      |      |                |       |       |       |  |                                                                                                                                              |                                  |                                                                                                                |                                                                                                                |                                                                                                               |
|------|------|----------------|-------|-------|-------|--|----------------------------------------------------------------------------------------------------------------------------------------------|----------------------------------|----------------------------------------------------------------------------------------------------------------|----------------------------------------------------------------------------------------------------------------|---------------------------------------------------------------------------------------------------------------|
| 8996 | 9009 | Cil_15G_00559V | IRAK  |       |       |  | Q9SD33/268/U183_ARATH<br>UPF0183 protein<br>At3g51130<br>OS=Arabidopsis thaliana<br>GN=At3g51130<br>PE=2 SV=2                                | K04733/IRAK4/receptor-associated | A0A067LH71/263/A0A067LH71_JATCU<br>Uncharacterized protein<br>OS=Jatropha curcas<br>GN=JCGZ_06481<br>PE=4 SV=1 | 2/IPR005373;<br>Uncharacterised protein family<br>UPF0183/IPR026960; Reverse transcriptase zinc-binding domain | NA                                                                                                            |
| 1395 | 1398 | Cil_15G_00734V | PTAR1 | 0.192 | 1.852 |  | Q7Z6K3/401/PTAR1_HUMAN<br>Protein<br>prenyltransferase alpha subunit repeat-containing protein 1<br>OS=Homo sapiens<br>GN=PTAR1<br>PE=1 SV=2 | K14137/PTAR1/prenyltransferase   | M5WEZ3/417/M5WEZ3_PRUPE<br>Uncharacterized protein<br>OS=Prunus persica<br>GN=PRUPE_ppa021259mg<br>PE=4 SV=1   | 1/1/IPR002088;<br>Protein<br>prenyltransferase, alpha subunit                                                  | GO:0008318;<br>protein<br>prenyltransferase activity;<br>function GO:0018342; protein prenylation;<br>process |
| 1395 | 1400 | Cil_15G_00735V | NA    |       |       |  | NA                                                                                                                                           | NA                               | NA                                                                                                             | NA                                                                                                             | NA                                                                                                            |
| 1665 | 1666 | Cil_15G_00816V | CBSX6 | 0.209 | 1.736 |  | Q8GZA4/422/CBSX6_ARATH<br>CBS domain-                                                                                                        | NA                               | A0A061F5V0/424/A0A061F5V0_THECC                                                                                | 1/1/IPR000644;<br>CBS domain                                                                                   | NA                                                                                                            |



|              |              |                         |                    |       |       |  |                                                                                                                                                                                                                          |                                                                                    |                                                                                                                                                                                                                     |                                                                                                                       |    |    |
|--------------|--------------|-------------------------|--------------------|-------|-------|--|--------------------------------------------------------------------------------------------------------------------------------------------------------------------------------------------------------------------------|------------------------------------------------------------------------------------|---------------------------------------------------------------------------------------------------------------------------------------------------------------------------------------------------------------------|-----------------------------------------------------------------------------------------------------------------------|----|----|
|              |              |                         |                    |       |       |  |                                                                                                                                                                                                                          | containing protein<br>CBSX6<br>OS=Arabidopsis<br>thaliana<br>GN=CBSX6<br>PE=1 SV=1 |                                                                                                                                                                                                                     | Cystathionine<br>beta-synthase<br>family protein<br>isoform 1<br>OS=Theobroma<br>cacao<br>GN=TCM_02527<br>1 PE=4 SV=1 |    |    |
| 1666<br>3309 | 1669<br>0525 | Cil_15G<br>_00817V<br>2 | NA                 |       |       |  | NA                                                                                                                                                                                                                       | NA                                                                                 | NA                                                                                                                                                                                                                  | NA                                                                                                                    | NA | NA |
| 1669<br>6856 | 1669<br>9850 | Cil_15G<br>_00818V<br>2 | RNH<br>X1          |       |       |  | P0C2F6/586/RN<br>HX1_ARATH<br>Putative<br>ribonuclease H<br>protein<br>At1g65750<br>OS=Arabidopsis<br>thaliana<br>GN=At1g65750<br>PE=3 SV=1<br>O00370/482/LOR<br>F2_HUMAN<br>LINE-1<br>retrotransposable<br>element ORF2 | K17535/TNNI3<br>K/kinase                                                           | M5VP36/423/M5<br>VP36_PRUPE<br>Uncharacterized<br>protein<br>(Fragment)<br>OS=Prunus<br>persica<br>GN=PRUPE_ppa<br>014760mg PE=4<br>SV=1<br>S8D906/806/S8D<br>906_9LAMI<br>Uncharacterized<br>protein<br>(Fragment) | 1/1/IPR026960;<br>Reverse<br>transcriptase zinc-<br>binding domain                                                    | NA |    |
| 1810<br>1155 | 1810<br>3927 | Cil_15G<br>_00863V<br>2 | LOR<br>F2/S<br>MC6 | 0.190 | 2.776 |  |                                                                                                                                                                                                                          | K22804/SMC6/<br>maintenance                                                        |                                                                                                                                                                                                                     | 2/IPR025558;<br>Domain of<br>unknown function<br>DUF4283/IPR025                                                       | NA |    |

|              |              |                     |                    |                                                                                                                                                    |                                  |                                                                                                           |                              |    |
|--------------|--------------|---------------------|--------------------|----------------------------------------------------------------------------------------------------------------------------------------------------|----------------------------------|-----------------------------------------------------------------------------------------------------------|------------------------------|----|
|              |              |                     |                    | protein OS=Homo sapiens PE=1 SV=1                                                                                                                  |                                  | OS=Genlisea aurea GN=M569_00896 PE=4 SV=1                                                                 | 836; Zinc knuckle CX2CX4HX4C |    |
|              |              |                     |                    | Q9ASS4/370/Y5838_ARATH Probably inactive leucine-rich repeat receptor-like protein kinase At5g48380 OS=Arabidopsis thaliana GN=At5g48380 PE=1 SV=1 |                                  | A5B9Q7/371/A5B9Q7_VITVI Putative uncharacterized protein OS=Vitis vinifera GN=VITISV_037939 PE=4 SV=1     |                              |    |
| 1815<br>3373 | 1815<br>4173 | Cil_15G_00864V<br>2 | BRI1/<br>IRAK<br>4 |                                                                                                                                                    | K04733/IRAK4/receptor-associated |                                                                                                           | NA                           | NA |
| 1815<br>9341 | 1815<br>9832 | Cil_15G_00865V<br>2 | NA                 | NA                                                                                                                                                 | NA                               | F6HSM6/139/F6HSM6_VITVI Putative uncharacterized protein OS=Vitis vinifera GN=VIT_14s0006g01930 PE=4 SV=1 | NA                           | NA |

---

|              |              |                         |     |       |       |                                                                                          |                                                 |                                                                                                                                                                                                                                                                                                                                                                                        |                                                                   |    |
|--------------|--------------|-------------------------|-----|-------|-------|------------------------------------------------------------------------------------------|-------------------------------------------------|----------------------------------------------------------------------------------------------------------------------------------------------------------------------------------------------------------------------------------------------------------------------------------------------------------------------------------------------------------------------------------------|-------------------------------------------------------------------|----|
| 1817<br>6361 | 1817<br>6826 | Cil_15G<br>_00866V<br>2 | NA  |       |       | NA                                                                                       | NA                                              | A5BB12/139/A5<br>BB12_VITVI<br>Putative<br>uncharacterized<br>protein OS=Vitis<br>vinifera<br>GN=VITISV_024<br>715 PE=4 SV=1<br>A0A067D926/22<br>5/A0A067D926_<br>CITSI<br>Uncharacterized<br>protein<br>(Fragment)<br>OS=Citrus<br>sinensis<br>GN=CISIN_1g04<br>1788mg PE=4<br>SV=1<br>A0A067JDW8/33<br>9/A0A067JDW8_<br>JATCU<br>Uncharacterized<br>protein<br>OS=Jatropha<br>curcas | NA                                                                | NA |
| 1818<br>4400 | 1818<br>9436 | Cil_15G<br>_00867V<br>2 | NA  |       |       | NA                                                                                       | NA                                              |                                                                                                                                                                                                                                                                                                                                                                                        | NA                                                                | NA |
| 1824<br>1674 | 1824<br>2981 | Cil_15G<br>_00868V<br>2 | INV | 0.193 | 2.505 | Q9SD53/457/Y37<br>20_ARATH<br>UPF0481 protein<br>At3g47200<br>OS=Arabidopsis<br>thaliana | K01193/INV,/b<br>eta-<br>fructofuranosida<br>se |                                                                                                                                                                                                                                                                                                                                                                                        | 1/1/IPR004158;<br>Protein of<br>unknown function<br>DUF247, plant | NA |

---

|              |              |                         |     |       |       |  |                                                                                                  |    |                                      |                                                                                                                                                                                                                                                                                                          |                                                                               |                                                                                              |
|--------------|--------------|-------------------------|-----|-------|-------|--|--------------------------------------------------------------------------------------------------|----|--------------------------------------|----------------------------------------------------------------------------------------------------------------------------------------------------------------------------------------------------------------------------------------------------------------------------------------------------------|-------------------------------------------------------------------------------|----------------------------------------------------------------------------------------------|
| 1827<br>6084 | 1828<br>0132 | Cil_15G<br>_00869V<br>2 | NA  |       |       |  | GN=At3g47200<br>PE=2 SV=1                                                                        | NA | K03549/kup/sytem                     | GN=JCGZ_25892<br>PE=4 SV=1<br>M5WQE3/108/M<br>5WQE3_PRUPE<br>Uncharacterized<br>protein<br>(Fragment)<br>OS=Prunus<br>persica<br>GN=PRUPE_ppa<br>015123m2g PE=4<br>SV=1<br>A5AEV7/1238/A<br>5AEV7_VITVI<br>Putative<br>uncharacterized<br>protein OS=Vitis<br>vinifera<br>GN=VITISV_018<br>031 PE=4 SV=1 | 1/1/IPR029480;<br>Transposase-<br>associated domain                           | NA                                                                                           |
| 1828<br>4403 | 1828<br>6129 | Cil_15G<br>_00870V<br>2 | NA  |       |       |  | NA                                                                                               | NA | NA                                   | A0A061DY29/63<br>3/A0A061DY29_<br>THECC DEG<br>protease 2<br>isoform 1<br>OS=Theobroma                                                                                                                                                                                                                   | 1/1/IPR004252;<br>Probable<br>transposase,<br>Ptta/En/Spm,<br>plant           | NA                                                                                           |
| 2300<br>0491 | 2301<br>2641 | Cil_15G<br>_01037V<br>2 | GBE | 0.179 | 1.541 |  | O82261/607/DEG<br>P2_ARATH<br>Protease Do-like<br>2, chloroplastic<br>OS=Arabidopsis<br>thaliana |    | K00700/GBE1,<br>1,4-alpha-<br>glucan | A0A061DY29/63<br>3/A0A061DY29_<br>THECC DEG<br>protease 2<br>isoform 1<br>OS=Theobroma                                                                                                                                                                                                                   | 3/IPR001478;<br>PDZ<br>domain/IPR01572<br>4; Serine<br>endopeptidase<br>DegP2 | GO:0004252;<br>serine-type<br>endopeptidase<br>activity;<br>function GO:00055<br>15; protein |

|              |              |                         |                         |                                                                                                                                                 |                                    |                                                                                                                            |                                                    |                                                                                                                                                                     |
|--------------|--------------|-------------------------|-------------------------|-------------------------------------------------------------------------------------------------------------------------------------------------|------------------------------------|----------------------------------------------------------------------------------------------------------------------------|----------------------------------------------------|---------------------------------------------------------------------------------------------------------------------------------------------------------------------|
|              |              |                         |                         | GN=DEGP2<br>PE=1 SV=2                                                                                                                           |                                    | cacao<br>GN=TCM_00453<br>0 PE=4 SV=1                                                                                       |                                                    | binding;<br>function GO:00065<br>08; proteolysis;<br>process<br>GO:0004499;<br>N,N-<br>dimethylaniline<br>monooxygenase<br>activity;<br>function GO:00506           |
| 2301<br>3451 | 2301<br>5300 | Cil_15G<br>_01038V<br>2 | YUC<br>10/Y<br>UCC<br>A | Q9FVQ0/377/YU<br>C10_ARATH<br>Probable indole-<br>3-pyruvate<br>monooxygenase<br>YUCCA10<br>OS=Arabidopsis<br>thaliana<br>GN=YUC10<br>PE=2 SV=1 | K11816/YUCC<br>A/monooxygena<br>se | M5VJ66/384/M5<br>VJ66_PRUPE<br>Uncharacterized<br>protein<br>OS=Prunus<br>persica<br>GN=PRUPE_ppa<br>007054mg PE=4<br>SV=1 | 1/1/IPR020946;<br>Flavin<br>monooxygenase-<br>like | 60; flavin adenine<br>dinucleotide<br>binding;<br>function GO:00506<br>61; NADP<br>binding;<br>function GO:00551<br>14; oxidation-<br>reduction process;<br>process |
| 2302<br>1173 | 2302<br>4683 | Cil_15G<br>_01039V<br>2 | KIP1-<br>like           | Q66GR8/242/NE<br>T3A_ARATH<br>Protein<br>NETWORKED<br>3A<br>OS=Arabidopsis                                                                      | K20478/GOLG<br>B1/subfamily        | A0A067H6A4/28<br>9/A0A067H6A4_<br>CITSI<br>Uncharacterized<br>protein OS=Citrus<br>sinensis                                | 1/1/IPR011684;<br>KIP1-like                        | NA                                                                                                                                                                  |

|      |      |              |     |                                                                                                                   |                           |                                                                                                                                   |                                                                                                                 |  |                                                                                                                                                                                                                                                                                                                                                                                                               |
|------|------|--------------|-----|-------------------------------------------------------------------------------------------------------------------|---------------------------|-----------------------------------------------------------------------------------------------------------------------------------|-----------------------------------------------------------------------------------------------------------------|--|---------------------------------------------------------------------------------------------------------------------------------------------------------------------------------------------------------------------------------------------------------------------------------------------------------------------------------------------------------------------------------------------------------------|
|      |      |              |     | thaliana<br>GN=NET3A<br>PE=2 SV=1                                                                                 |                           | GN=CISIN_1g04<br>8255mg PE=4<br>SV=1                                                                                              |                                                                                                                 |  |                                                                                                                                                                                                                                                                                                                                                                                                               |
|      |      |              |     |                                                                                                                   |                           |                                                                                                                                   |                                                                                                                 |  | GO:0005774;<br>vacuolar<br>membrane;<br>component GO:00<br>05886; plasma<br>membrane;<br>component GO:00<br>06812; cation<br>transport;<br>process GO:00068<br>14; sodium ion<br>transport;<br>process GO:00068<br>85; regulation of<br>pH;<br>process GO:00096<br>51; response to salt<br>stress;<br>process GO:00152<br>99; solute:proton<br>antiporter activity;<br>function GO:00153<br>85; sodium:proton |
| 2308 | 2310 | Cil_15G      | NHX | Q56XP4/537/NH<br>X2_ARATH<br>Sodium/hydrogen<br>exchanger 2<br>OS=Arabidopsis<br>thaliana<br>GN=NHX2 PE=2<br>SV=2 | K14724/SLC9A<br>8,/solute | A0A0B0NMF6/5<br>21/A0A0B0NMF<br>6_GOSAR<br>Sodium/hydrogen<br>exchanger<br>OS=Gossypium<br>arboreum<br>GN=F383_00537<br>PE=3 SV=1 | 4/IPR018422;<br>Cation/H+<br>exchanger, CPA1<br>family/IPR02987<br>2; Na+/H+<br>exchanger NHX -<br>type, plants |  |                                                                                                                                                                                                                                                                                                                                                                                                               |
| 8448 | 4124 | _01040V<br>2 | 2   |                                                                                                                   |                           |                                                                                                                                   |                                                                                                                 |  |                                                                                                                                                                                                                                                                                                                                                                                                               |

---

antiporter activity;  
function|GO:00160  
21; integral  
component of  
membrane;  
component|GO:00  
55075; potassium  
ion homeostasis;  
process|GO:00550  
85; transmembrane  
transport; process

---
