# Supplementary material for: Chromosome-scale assembly reveals asymmetric paleo-subgenome evolution and targets for the acceleration of fungal resistance breeding in the nut crop, pecan
Source: PubMed Central journal article supplement — Plant Commun. 2021 Sep 24;2(6):100247. doi: 10.1016/j.xplc.2021.100247 (PMC8577110; doi:10.1016/j.xplc.2021.100247), 2021-09-24
Supplement: mmc4.pdf [file mmc4.pdf]

Table S24. Phenotypes of two selected regions including the protein-encoding genes of chitinases (*CHIs*) and ionotropic glutamate receptors (*GRIPs*).

| Gene ID        | Chromosome | Position | mutation type      | Nucleotide change | Amino acid change | sites (S) | Sensistive     |                 | sites (R) | Resistant       |                 | $\pi$ ratio | Fst        | $\pi_S$   | $\pi_R$   |
|----------------|------------|----------|--------------------|-------------------|-------------------|-----------|----------------|-----------------|-----------|-----------------|-----------------|-------------|------------|-----------|-----------|
| Cil_09G_0199V2 | chr09      | 3163608  | missense_variant   | c.196C>G          | p.Pro66Ala        | 112       | C:0.80<br>3571 | G:0.196<br>429  | 60        | C:0.833<br>333  | G:0.166<br>667  | 1.12<br>8   | -<br>0.007 | -         | -         |
|                | chr09      | 3164389  | missense_variant   | c.769G>C          | p.Glu257Gln       | 110       | G:0.74<br>5455 | C:0.254<br>545  | 60        | G:0.933<br>333  | C:0.066<br>6667 | 3.02<br>6   | 0.1<br>01  | -         | -         |
|                | chr09      | 3190099  | missense_variant   | c.230C>T          | p.Ser77Phe        | 112       | C:0.97<br>3214 | T:0.026<br>7857 | 60        | C:0.666<br>667  | T:0.333<br>333  | 0.11<br>6   | 0.3<br>27  | -         | -         |
| Cil_09G_0200V2 | chr09      | 3190114  | missense_variant   | c.245T>C          | p.Leu82Ser        | 112       | T:0.63<br>3929 | C:0.366<br>071  | 58        | T:0.948<br>276  | C:0.051<br>7241 | 4.69<br>2   | 0.2<br>21  | -         | -         |
|                | chr09      | 3190142  | missense_variant   | c.273C>A          | p.His91Gln        | 110       | C:0.36<br>3636 | A:0.636<br>364  | 60        | C:0.033<br>3333 | A:0.966<br>667  | 7.12<br>7   | 0.2<br>48  | -         | -         |
|                | chr09      | 3190203  | missense_variant   | c.334G>A          | p.Gly112Ser       | 112       | G:0.94<br>6429 | A:0.053<br>5714 | 60        | G:0.616<br>667  | A:0.383<br>333  | 0.21<br>3   | 0.3<br>15  | -         | -         |
|                | chr09      | 3190363  | intron_variant     | c.427+67C>T       |                   | 110       | C:0.47<br>2727 | T:0.527<br>273  | 60        | C:0.683<br>333  | T:0.316<br>667  | 1.14<br>3   | 0.0<br>80  | -         | -         |
| Cil_15G_0015V2 | chr15      | 299519   | missense_variant   | c.3416C>T         | p.Pro113Leu       | 112       | G:0.15<br>1786 | A:0.848<br>214  | 60        | G:0.033<br>3333 | A:0.966<br>667  | 3.96<br>4   | 0.0<br>59  | 0.2<br>60 | 0.0<br>66 |
|                | chr15      | 299557   | synonymous_variant | c.3378C>T         | p.Asp1126Asp      | 112       | G:0.29<br>4643 | A:0.705<br>357  | 60        | G:0.15          | A:0.85          | 1.61<br>7   | 0.0<br>45  | 0.4<br>19 | 0.2<br>59 |
|                | chr15      | 299580   | missense_variant   | c.3355C>A         | p.Pro1119Thr      | 112       | G:0.29<br>4643 | T:0.705<br>357  | 60        | G:0.15          | T:0.85          | 1.61<br>7   | 0.0<br>45  | 0.4<br>19 | 0.2<br>59 |

|       |            |                             |                |                  |     |                |                |    |                |                 |           |                |           |           |
|-------|------------|-----------------------------|----------------|------------------|-----|----------------|----------------|----|----------------|-----------------|-----------|----------------|-----------|-----------|
| chr15 | 2995<br>90 | synonymous_variant          | c.3345A><br>G  | p.Leu111<br>5Leu | 112 | T:0.67<br>8571 | C:0.321<br>429 | 60 | T:0.95         | C:0.05          | 4.55<br>6 | 0.1<br>83      | 0.4<br>40 | 0.0<br>97 |
| chr15 | 2997<br>49 | missense_variant            | c.3186A><br>T  | p.Arg106<br>2Ser | 112 | T:0.88<br>3929 | A:0.116<br>071 | 60 | T:0.916<br>667 | A:0.083<br>3333 | 1.33<br>3 | -<br>0.0<br>07 | 0.2<br>07 | 0.1<br>55 |
| chr15 | 2997<br>69 | missense_variant            | c.3166G><br>A  | p.Val105<br>6Ile | 112 | C:0.29<br>4643 | T:0.705<br>357 | 60 | C:0.15         | T:0.85          | 1.61<br>7 | 0.0<br>45      | 0.4<br>19 | 0.2<br>59 |
| chr15 | 2997<br>96 | missense_variant            | c.3139A><br>G  | p.Lys104<br>7Glu | 112 | T:0.88<br>3929 | C:0.116<br>071 | 60 | T:0.916<br>667 | C:0.083<br>3333 | 1.33<br>3 | -<br>0.0<br>07 | 0.2<br>07 | 0.1<br>55 |
| chr15 | 2998<br>74 | missense_variant            | c.3061C><br>G  | p.Gln102<br>1Glu | 112 | G:0.29<br>4643 | C:0.705<br>357 | 60 | G:0.15         | C:0.85          | 1.61<br>7 | 0.0<br>45      | 0.4<br>19 | 0.2<br>59 |
| chr15 | 2999<br>09 | missense_variant            | c.3026T><br>A  | p.Leu100<br>9Gln | 112 | A:0.29<br>4643 | T:0.705<br>357 | 60 | A:0.15         | T:0.85          | 1.61<br>7 | 0.0<br>45      | 0.4<br>19 | 0.2<br>59 |
| chr15 | 3007<br>94 | downstream_gene_vari<br>ant | c.*1765A<br>>T |                  | 112 | A:0.30<br>3571 | T:0.696<br>429 | 60 | A:0.15         | T:0.85          | 1.64<br>5 | 0.0<br>51      | 0.4<br>27 | 0.2<br>59 |
| chr15 | 3008<br>42 | downstream_gene_vari<br>ant | c.*1813A<br>>C |                  | 112 | A:0.29<br>4643 | C:0.705<br>357 | 60 | A:0.15         | C:0.85          | 1.61<br>7 | 0.0<br>45      | 0.4<br>19 | 0.2<br>59 |
| chr15 | 3008<br>82 | downstream_gene_vari<br>ant | c.*1853C<br>>A |                  | 112 | C:0.29<br>4643 | A:0.705<br>357 | 60 | C:0.15         | A:0.85          | 1.61<br>7 | 0.0<br>45      | 0.4<br>19 | 0.2<br>59 |
| chr15 | 3009<br>51 | downstream_gene_vari<br>ant | c.*1922C<br>>T |                  | 110 | C:0.3          | T:0.7          | 60 | C:0.15         | T:0.85          | 1.63<br>4 | 0.0<br>48      | 0.4<br>24 | 0.2<br>59 |
| chr15 | 3009<br>93 | downstream_gene_vari<br>ant | c.*1964A<br>>G |                  | 112 | A:0.29<br>4643 | G:0.705<br>357 | 58 | A:0.155<br>172 | G:0.844<br>828  | 1.57<br>2 | 0.0<br>41      | 0.4<br>19 | 0.2<br>67 |
| chr15 | 3010<br>95 | missense_variant            | c.2772G><br>C  | p.Met92<br>4Ile  | 112 | C:0.30<br>3571 | G:0.696<br>429 | 58 | C:0.155<br>172 | G:0.844<br>828  | 1.59<br>9 | 0.0<br>47      | 0.4<br>27 | 0.2<br>67 |

|       |            |                             |                |                 |     |                |                 |    |                 |                 |           |                |           |           |
|-------|------------|-----------------------------|----------------|-----------------|-----|----------------|-----------------|----|-----------------|-----------------|-----------|----------------|-----------|-----------|
| chr15 | 3011<br>22 | missense_variant            | c.2745C><br>G  | p.His915<br>Gln | 110 | G:0.88<br>1818 | C:0.118<br>182  | 60 | G:0.916<br>667  | C:0.083<br>3333 | 1.35<br>4 | -<br>0.0<br>07 | 0.2<br>10 | 0.1<br>55 |
| chr15 | 3021<br>86 | synonymous_variant          | c.1935A><br>G  | p.Thr645<br>Thr | 112 | T:0.17<br>8571 | C:0.821<br>429  | 60 | T:0.066<br>6667 | C:0.933<br>333  | 2.33<br>9 | 0.0<br>39      | 0.2<br>96 | 0.1<br>27 |
| chr15 | 3022<br>34 | downstream_gene_vari<br>ant | c.*3205C<br>>T |                 | 112 | C:0.28<br>5714 | T:0.714<br>286  | 58 | C:0.155<br>172  | T:0.844<br>828  | 1.54<br>4 | 0.0<br>35      | 0.4<br>12 | 0.2<br>67 |
| chr15 | 3022<br>51 | downstream_gene_vari<br>ant | c.*3222C<br>>A |                 | 112 | C:0.28<br>5714 | A:0.714<br>286  | 58 | C:0.155<br>172  | A:0.844<br>828  | 1.54<br>4 | 0.0<br>35      | 0.4<br>12 | 0.2<br>67 |
| chr15 | 3023<br>80 | downstream_gene_vari<br>ant | c.*3351T<br>>C |                 | 112 | T:0.29<br>4643 | C:0.705<br>357  | 60 | T:0.233<br>333  | C:0.766<br>667  | 1.15<br>3 | -<br>0.0<br>02 | 0.4<br>19 | 0.3<br>64 |
| chr15 | 3023<br>90 | downstream_gene_vari<br>ant | c.*3361G<br>>C |                 | 112 | G:0.17<br>8571 | C:0.821<br>429  | 60 | G:0.066<br>6667 | C:0.933<br>333  | 2.33<br>9 | 0.0<br>39      | 0.2<br>96 | 0.1<br>27 |
| chr15 | 3024<br>27 | downstream_gene_vari<br>ant | c.*3398A<br>>G |                 | 112 | A:0.29<br>4643 | G:0.705<br>357  | 60 | A:0.15          | G:0.85          | 1.61<br>7 | 0.0<br>45      | 0.4<br>19 | 0.2<br>59 |
| chr15 | 3025<br>18 | downstream_gene_vari<br>ant | c.*3489C<br>>T |                 | 112 | C:0.29<br>4643 | T:0.705<br>357  | 60 | C:0.15          | T:0.85          | 1.61<br>7 | 0.0<br>45      | 0.4<br>19 | 0.2<br>59 |
| chr15 | 3027<br>24 | downstream_gene_vari<br>ant | c.*3695A<br>>C |                 | 112 | A:0.91<br>0714 | C:0.089<br>2857 | 60 | A:0.966<br>667  | C:0.033<br>3333 | 2.50<br>4 | 0.0<br>12      | 0.1<br>64 | 0.0<br>66 |
| chr15 | 3027<br>36 | downstream_gene_vari<br>ant | c.*3707C<br>>A |                 | 110 | C:0.29<br>0909 | A:0.709<br>091  | 60 | C:0.15          | A:0.85          | 1.60<br>6 | 0.0<br>43      | 0.4<br>16 | 0.2<br>59 |
| chr15 | 3027<br>77 | downstream_gene_vari<br>ant | c.*3748T<br>>G |                 | 110 | T:0.14<br>5455 | G:0.854<br>545  | 60 | T:0.033<br>3333 | G:0.966<br>667  | 3.82<br>8 | 0.0<br>54      | 0.2<br>51 | 0.0<br>66 |
| chr15 | 3028<br>45 | synonymous_variant          | c.1878T><br>C  | p.Val626<br>Val | 112 | A:0.13<br>3929 | G:0.866<br>071  | 60 | A:0.016<br>6667 | G:0.983<br>333  | 7.02<br>2 | 0.0<br>68      | 0.2<br>34 | 0.0<br>33 |

|                |            |                       |                       |                |                 |                |                |                 |                |                |                 |           |                |           |           |
|----------------|------------|-----------------------|-----------------------|----------------|-----------------|----------------|----------------|-----------------|----------------|----------------|-----------------|-----------|----------------|-----------|-----------|
| Cil_15G_0016V2 | chr15      | 3036<br>63            | synonymous_variant    | c.1146C><br>T  | p.Thr382<br>Thr | 112            | G:0.88<br>3929 | A:0.116<br>071  | 60             | G:0.916<br>667 | A:0.083<br>3333 | 1.33<br>3 | -<br>0.0<br>07 | 0.2<br>07 | 0.1<br>55 |
|                | chr15      | 3041<br>46            | synonymous_variant    | c.663T>G       | p.Ser221<br>Ser | 112            | A:0.91<br>9643 | C:0.080<br>3571 | 60             | A:0.95         | C:0.05          | 1.54<br>4 | -<br>0.0<br>07 | 0.1<br>49 | 0.0<br>97 |
|                | chr15      | 3043<br>23            | synonymous_variant    | c.486T>C       | p.Tyr162<br>Tyr | 112            | A:0.29<br>4643 | G:0.705<br>357  | 60             | A:0.15         | G:0.85          | 1.61<br>7 | 0.0<br>45      | 0.4<br>19 | 0.2<br>59 |
|                | chr15      | 3047<br>76            | missense_variant      | c.171C>A       | p.Asp57<br>Glu  | 110            | G:0.29<br>0909 | T:0.709<br>091  | 60             | G:0.15         | T:0.85          | 1.60<br>6 | 0.0<br>43      | 0.4<br>16 | 0.2<br>59 |
|                | chr15      | 3048<br>81            | synonymous_variant    | c.66T>C        | p.Val22<br>Val  | 112            | A:0.29<br>4643 | G:0.705<br>357  | 60             | A:0.15         | G:0.85          | 1.61<br>7 | 0.0<br>45      | 0.4<br>19 | 0.2<br>59 |
|                | chr15      | 3048<br>93            | synonymous_variant    | c.54A>G        | p.Ser18S<br>er  | 112            | T:0.29<br>4643 | C:0.705<br>357  | 60             | T:0.15         | C:0.85          | 1.61<br>7 | 0.0<br>45      | 0.4<br>19 | 0.2<br>59 |
|                | chr15      | 3070<br>17            | missense_variant      | c.2632G><br>A  | p.Val878<br>Ile | 112            | C:0.30<br>3571 | T:0.696<br>429  | 58             | C:0.189<br>655 | T:0.810<br>345  | 1.36<br>4 | 0.0<br>22      | 0.4<br>27 | 0.3<br>13 |
|                | chr15      | 3070<br>19            | missense_variant      | c.2630G><br>T  | p.Arg877<br>Met | 112            | C:0.30<br>3571 | A:0.696<br>429  | 58             | C:0.189<br>655 | A:0.810<br>345  | 1.36<br>4 | 0.0<br>22      | 0.4<br>27 | 0.3<br>13 |
|                | chr15      | 3073<br>06            | synonymous_variant    | c.2343C><br>T  | p.Leu781<br>Leu | 112            | G:0.29<br>4643 | A:0.705<br>357  | 60             | G:0.183<br>333 | A:0.816<br>667  | 1.37<br>7 | 0.0<br>22      | 0.4<br>19 | 0.3<br>05 |
|                | chr15      | 3076<br>32            | upstream_gene_variant | c.-<br>2686C>T |                 | 112            | G:0.62<br>5    | A:0.375         | 60             | G:0.283<br>333 | A:0.716<br>667  | 1.14<br>5 | 0.1<br>98      | 0.4<br>73 | 0.4<br>13 |
| chr15          | 3076<br>49 | upstream_gene_variant | c.-<br>2703A>G        |                | 112             | T:0.62<br>5    | C:0.375        | 60              | T:0.283<br>333 | C:0.716<br>667 | 1.14<br>5       | 0.1<br>98 | 0.4<br>73      | 0.4<br>13 |           |
| chr15          | 3076<br>92 | upstream_gene_variant | c.-<br>2746A>G        |                | 110             | T:0.62<br>7273 | C:0.372<br>727 | 60              | T:0.283<br>333 | C:0.716<br>667 | 1.14<br>3       | 0.2<br>00 | 0.4<br>72      | 0.4<br>13 |           |

|       |            |                       |                |                 |     |                |                |    |                  |                |           |           |           |           |
|-------|------------|-----------------------|----------------|-----------------|-----|----------------|----------------|----|------------------|----------------|-----------|-----------|-----------|-----------|
| chr15 | 3077<br>41 | upstream_gene_variant | c.-<br>2795A>G |                 | 112 | T:0.62<br>5    | C:0.375        | 60 | T:0.283<br>333   | C:0.716<br>667 | 1.14<br>5 | 0.1<br>98 | 0.4<br>73 | 0.4<br>13 |
| chr15 | 3080<br>84 | synonymous_variant    | c.2157C><br>T  | p.Asp71<br>9Asp | 112 | G:0.72<br>3214 | A:0.276<br>786 | 60 | G:0.583<br>333   | A:0.416<br>667 | 0.81<br>7 | 0.0<br>37 | 0.4<br>04 | 0.4<br>94 |
| chr15 | 3084<br>48 | upstream_gene_variant | c.-<br>3502A>G |                 | 110 | T:0.68<br>1818 | C:0.318<br>182 | 60 | T:0.266<br>667   | C:0.733<br>333 | 1.10<br>1 | 0.2<br>82 | 0.4<br>38 | 0.3<br>98 |
| chr15 | 3084<br>84 | upstream_gene_variant | c.-<br>3538C>T |                 | 112 | G:0.67<br>8571 | A:0.321<br>429 | 60 | G:0.266<br>667   | A:0.733<br>333 | 1.10<br>7 | 0.2<br>78 | 0.4<br>40 | 0.3<br>98 |
| chr15 | 3086<br>62 | upstream_gene_variant | c.-<br>3716G>A |                 | 112 | C:0.67<br>8571 | T:0.321<br>429 | 60 | C:0.9<br>T:0.1   |                | 2.40<br>5 | 0.1<br>17 | 0.4<br>40 | 0.1<br>83 |
| chr15 | 3089<br>59 | synonymous_variant    | c.1650C><br>T  | p.Ser550<br>Ser | 112 | G:0.41<br>0714 | A:0.589<br>286 | 60 | G:0.15<br>A:0.85 |                | 1.88<br>3 | 0.1<br>38 | 0.4<br>88 | 0.2<br>59 |
| chr15 | 3092<br>79 | missense_variant      | c.1499T><br>C  | p.Leu500<br>Ser | 112 | A:0.13<br>3929 | G:0.866<br>071 | 60 | A:0.016<br>6667  | G:0.983<br>333 | 7.02<br>2 | 0.0<br>68 | 0.2<br>34 | 0.0<br>33 |
| chr15 | 3093<br>40 | missense_variant      | c.1438C><br>A  | p.Pro480<br>Thr | 112 | G:0.67<br>8571 | T:0.321<br>429 | 60 | G:0.266<br>667   | T:0.733<br>333 | 1.10<br>7 | 0.2<br>78 | 0.4<br>40 | 0.3<br>98 |
| chr15 | 3097<br>17 | missense_variant      | c.1061T><br>C  | p.Ile354<br>Thr | 112 | A:0.67<br>8571 | G:0.321<br>429 | 60 | A:0.266<br>667   | G:0.733<br>333 | 1.10<br>7 | 0.2<br>78 | 0.4<br>40 | 0.3<br>98 |
| chr15 | 3097<br>29 | missense_variant      | c.1049T><br>C  | p.Leu350<br>Ser | 112 | A:0.67<br>8571 | G:0.321<br>429 | 58 | A:0.275<br>862   | G:0.724<br>138 | 1.08<br>3 | 0.2<br>67 | 0.4<br>40 | 0.4<br>07 |
| chr15 | 3097<br>42 | missense_variant      | c.1036C><br>T  | p.Arg346<br>Cys | 112 | G:0.67<br>8571 | A:0.321<br>429 | 58 | G:0.275<br>862   | A:0.724<br>138 | 1.08<br>3 | 0.2<br>67 | 0.4<br>40 | 0.4<br>07 |
| chr15 | 3098<br>39 | synonymous_variant    | c.939G>A       | p.Gly313<br>Gly | 112 | C:0.68<br>75   | T:0.312<br>5   | 60 | C:0.283<br>333   | T:0.716<br>667 | 1.05<br>0 | 0.2<br>70 | 0.4<br>34 | 0.4<br>13 |
| chr15 | 3100<br>67 | missense_variant      | c.797C>T       | p.Ser266<br>Phe | 112 | G:0.66<br>9643 | A:0.330<br>357 | 60 | G:0.266<br>667   | A:0.733<br>333 | 1.12<br>2 | 0.2<br>67 | 0.4<br>46 | 0.3<br>98 |

|                |        |                                          |                    |                 |                 |                |                |                |                |                 |                 |           |                |           |           |
|----------------|--------|------------------------------------------|--------------------|-----------------|-----------------|----------------|----------------|----------------|----------------|-----------------|-----------------|-----------|----------------|-----------|-----------|
| Cil_15G_0017V2 | chr15  | 310138                                   | missense_variant   | c.726A>T        | p.Glu242<br>Asp | 112            | T:0.67<br>8571 | A:0.321<br>429 | 60             | T:0.95          | A:0.05          | 4.55<br>6 | 0.1<br>83      | 0.4<br>40 | 0.0<br>97 |
|                | chr15  | 310382                                   | missense_variant   | c.482G>A        | p.Gly161<br>Glu | 112            | C:0.66<br>9643 | T:0.330<br>357 | 60             | C:0.266<br>667  | T:0.733<br>333  | 1.12<br>2 | 0.2<br>67      | 0.4<br>46 | 0.3<br>98 |
|                | chr15  | 310443                                   | synonymous_variant | c.421C>A        | p.Arg141<br>Arg | 112            | G:0.88<br>3929 | T:0.116<br>071 | 60             | G:0.9           | T:0.1           | 1.13<br>1 | -<br>0.0<br>12 | 0.2<br>07 | 0.1<br>83 |
|                | chr15  | 310669                                   | intron_variant     | c.259+34<br>G>A |                 | 112            | C:0.67<br>8571 | T:0.321<br>429 | 60             | C:0.266<br>667  | T:0.733<br>333  | 1.10<br>7 | 0.2<br>78      | 0.4<br>40 | 0.3<br>98 |
|                | chr15  | 310678                                   | intron_variant     | c.259+25<br>A>T |                 | 112            | T:0.67<br>8571 | A:0.321<br>429 | 60             | T:0.916<br>667  | A:0.083<br>3333 | 2.83<br>3 | 0.1<br>37      | 0.4<br>40 | 0.1<br>55 |
|                | chr15  | 310683                                   | intron_variant     | c.259+20<br>G>A |                 | 112            | C:0.67<br>8571 | T:0.321<br>429 | 60             | C:0.266<br>667  | T:0.733<br>333  | 1.10<br>7 | 0.2<br>78      | 0.4<br>40 | 0.3<br>98 |
|                | chr15  | 310802                                   | missense_variant   | c.160C>G        | p.His54<br>Asp  | 112            | G:0.66<br>9643 | C:0.330<br>357 | 60             | G:0.266<br>667  | C:0.733<br>333  | 1.12<br>2 | 0.2<br>67      | 0.4<br>46 | 0.3<br>98 |
|                | chr15  | 310900                                   | missense_variant   | c.62T>C         | p.Val21<br>Ala  | 112            | A:0.13<br>3929 | G:0.866<br>071 | 60             | A:0.016<br>6667 | G:0.983<br>333  | 7.02<br>2 | 0.0<br>68      | 0.2<br>34 | 0.0<br>33 |
|                | chr15  | 322495                                   | missense_variant   | c.2631G><br>A   | p.Met87<br>Ile  | 110            | C:0.83<br>6364 | T:0.163<br>636 | 60             | C:0.333<br>333  | T:0.666<br>667  | 0.61<br>1 | 0.4<br>20      | 0.2<br>76 | 0.4<br>52 |
|                | chr15  | 322572                                   | missense_variant   | c.2554C><br>A   | p.Gln852<br>Lys | 112            | G:0.83<br>9286 | T:0.160<br>714 | 60             | G:0.95          | T:0.05          | 2.81<br>8 | 0.0<br>45      | 0.2<br>72 | 0.0<br>97 |
| chr15          | 323615 | splice_region_variant&<br>intron_variant | c.1909+8<br>T>A    |                 | 112             | A:0.33<br>0357 | T:0.669<br>643 | 60             | A:0.133<br>333 | T:0.866<br>667  | 1.89<br>9       | 0.0<br>88 | 0.4<br>46      | 0.2<br>35 |           |
| chr15          | 324197 | intron_variant                           | c.1600-<br>39T>C   |                 | 112             | A:0.33<br>0357 | G:0.669<br>643 | 60             | A:0.15         | G:0.85          | 1.72<br>2       | 0.0<br>72 | 0.4<br>46      | 0.2<br>59 |           |

|                |       |            |                    |                   |                 |     |                |                 |    |                 |                 |           |           |           |           |
|----------------|-------|------------|--------------------|-------------------|-----------------|-----|----------------|-----------------|----|-----------------|-----------------|-----------|-----------|-----------|-----------|
| Cil_15G_0018V2 | chr15 | 3244<br>70 | missense_variant   | c.1417G><br>A     | p.Val473<br>Ile | 112 | C:0.84<br>8214 | T:0.151<br>786  | 60 | C:0.966<br>667  | T:0.033<br>3333 | 3.96<br>4 | 0.0<br>48 | 0.2<br>60 | 0.0<br>66 |
|                | chr15 | 3251<br>37 | synonymous_variant | c.750C>T          | p.Tyr250<br>Tyr | 112 | G:0.16<br>0714 | A:0.839<br>286  | 60 | G:0.083<br>3333 | A:0.916<br>667  | 1.75<br>2 | 0.0<br>15 | 0.2<br>72 | 0.1<br>55 |
|                | chr15 | 3254<br>97 | synonymous_variant | c.390T>C          | p.Pro130<br>Pro | 112 | A:0.33<br>0357 | G:0.669<br>643  | 60 | A:0.133<br>333  | G:0.866<br>667  | 1.89<br>9 | 0.0<br>88 | 0.4<br>46 | 0.2<br>35 |
|                | chr15 | 3257<br>26 | intron_variant     | c.262+22<br>A>G   |                 | 112 | T:0.13<br>3929 | C:0.866<br>071  | 60 | T:0.05          | C:0.95          | 2.42<br>3 | 0.0<br>26 | 0.2<br>34 | 0.0<br>97 |
|                | chr15 | 3336<br>18 | synonymous_variant | c.2274T><br>C     | p.Leu758<br>Leu | 112 | A:0.47<br>3214 | G:0.526<br>786  | 60 | A:0.133<br>333  | G:0.866<br>667  | 2.14<br>0 | 0.2<br>14 | 0.5<br>03 | 0.2<br>35 |
|                | chr15 | 3338<br>22 | intron_variant     | c.2101-<br>31C>A  |                 | 112 | G:0.47<br>3214 | T:0.526<br>786  | 60 | G:0.15          | T:0.85          | 1.94<br>0 | 0.1<br>93 | 0.5<br>03 | 0.2<br>59 |
|                | chr15 | 3339<br>98 | intron_variant     | c.2100+10<br>3G>A |                 | 112 | C:0.37<br>5    | T:0.625         | 60 | C:0.083<br>3333 | T:0.916<br>667  | 3.04<br>4 | 0.1<br>87 | 0.4<br>73 | 0.1<br>55 |
|                | chr15 | 3340<br>58 | intron_variant     | c.2100+43<br>T>C  |                 | 112 | A:0.47<br>3214 | G:0.526<br>786  | 60 | A:0.183<br>333  | G:0.816<br>667  | 1.65<br>2 | 0.1<br>55 | 0.5<br>03 | 0.3<br>05 |
|                | chr15 | 3342<br>69 | synonymous_variant | c.1932T><br>C     | p.Leu644<br>Leu | 112 | A:0.85<br>7143 | G:0.142<br>857  | 60 | A:1             | G:0             | ###<br>#  | 0.1<br>04 | 0.2<br>47 | 0.0<br>00 |
|                | chr15 | 3345<br>20 | intron_variant     | c.1694-<br>13T>C  |                 | 112 | A:0.13<br>3929 | G:0.866<br>071  | 60 | A:0.05          | G:0.95          | 2.42<br>3 | 0.0<br>26 | 0.2<br>34 | 0.0<br>97 |
|                | chr15 | 3347<br>70 | intron_variant     | c.1661+89<br>A>G  |                 | 112 | T:0.87<br>5    | C:0.125         | 60 | T:0.366<br>667  | C:0.633<br>333  | 0.46<br>7 | 0.4<br>49 | 0.2<br>21 | 0.4<br>72 |
|                | chr15 | 3363<br>14 | synonymous_variant | c.300T>C          | p.Asp10<br>0Asp | 112 | A:0.91<br>9643 | G:0.080<br>3571 | 60 | A:0.966<br>667  | G:0.033<br>3333 | 2.27<br>6 | 0.0<br>06 | 0.1<br>49 | 0.0<br>66 |
|                | chr15 | 3366<br>17 | intron_variant     | c.47-<br>50G>C    |                 | 112 | C:0.47<br>3214 | G:0.526<br>786  | 60 | C:0.133<br>333  | G:0.866<br>667  | 2.14<br>0 | 0.2<br>14 | 0.5<br>03 | 0.2<br>35 |

|                     |       |            |                                          |                   |                  |     |                |                 |    |                |                 |           |           |           |           |
|---------------------|-------|------------|------------------------------------------|-------------------|------------------|-----|----------------|-----------------|----|----------------|-----------------|-----------|-----------|-----------|-----------|
| Cil_15G_0<br>0019V2 | chr15 | 3582<br>59 | synonymous_variant                       | c.4338A><br>G     | p.Gly144<br>6Gly | 112 | T:0.87<br>5    | C:0.125         | 60 | T:0.366<br>667 | C:0.633<br>333  | 0.46<br>7 | 0.4<br>49 | 0.2<br>21 | 0.4<br>72 |
|                     | chr15 | 3586<br>31 | synonymous_variant                       | c.3966C><br>T     | p.Ala132<br>2Ala | 112 | G:0.91<br>0714 | A:0.089<br>2857 | 60 | G:0.966<br>667 | A:0.033<br>3333 | 2.50<br>4 | 0.0<br>12 | 0.1<br>64 | 0.0<br>66 |
|                     | chr15 | 3588<br>65 | intron_variant                           | c.3939+19<br>0G>A |                  | 112 | C:0.87<br>5    | T:0.125         | 60 | C:0.366<br>667 | T:0.633<br>333  | 0.46<br>7 | 0.4<br>49 | 0.2<br>21 | 0.4<br>72 |
|                     | chr15 | 3591<br>19 | missense_variant                         | c.3875T><br>C     | p.Phe129<br>2Ser | 110 | A:0.91<br>8182 | G:0.081<br>8182 | 60 | A:0.966<br>667 | G:0.033<br>3333 | 2.31<br>4 | 0.0<br>07 | 0.1<br>52 | 0.0<br>66 |
|                     | chr15 | 3595<br>01 | intron_variant                           | c.3533-<br>40A>G  |                  | 112 | T:0.83<br>9286 | C:0.160<br>714  | 60 | T:0.3          | C:0.7           | 0.63<br>7 | 0.4<br>66 | 0.2<br>72 | 0.4<br>27 |
|                     | chr15 | 3595<br>91 | synonymous_variant                       | c.3522T><br>C     | p.Phe117<br>4Phe | 110 | A:0.83<br>6364 | G:0.163<br>636  | 60 | A:0.3          | G:0.7           | 0.64<br>7 | 0.4<br>61 | 0.2<br>76 | 0.4<br>27 |
|                     | chr15 | 3599<br>85 | synonymous_variant                       | c.3315C><br>A     | p.Val110<br>5Val | 112 | G:0.91<br>0714 | T:0.089<br>2857 | 60 | G:0.966<br>667 | T:0.033<br>3333 | 2.50<br>4 | 0.0<br>12 | 0.1<br>64 | 0.0<br>66 |
|                     | chr15 | 3603<br>78 | synonymous_variant                       | c.3019C><br>A     | p.Arg100<br>7Arg | 112 | G:0.83<br>9286 | T:0.160<br>714  | 60 | G:0.316<br>667 | T:0.683<br>333  | 0.61<br>8 | 0.4<br>47 | 0.2<br>72 | 0.4<br>40 |
|                     | chr15 | 3604<br>19 | missense_variant                         | c.2978A><br>C     | p.Lys993<br>Thr  | 112 | T:0.85<br>7143 | G:0.142<br>857  | 60 | T:1            | G:0             | ###<br>#  | 0.1<br>04 | 0.2<br>47 | 0.0<br>00 |
|                     | chr15 | 3607<br>09 | splice_region_variant&<br>intron_variant | c.2779+4<br>G>A   |                  | 112 | C:0.91<br>9643 | T:0.080<br>3571 | 60 | C:1            | T:0             | ###<br>#  | 0.0<br>52 | 0.1<br>49 | 0.0<br>00 |
|                     | chr15 | 3616<br>89 | missense_variant                         | c.1900C><br>A     | p.Pro634<br>Thr  | 112 | G:0.85<br>7143 | T:0.142<br>857  | 60 | G:1            | T:0             | ###<br>#  | 0.1<br>04 | 0.2<br>47 | 0.0<br>00 |
|                     | chr15 | 3618<br>17 | missense_variant                         | c.1772T><br>C     | p.Ile591<br>Thr  | 112 | A:0.42<br>8571 | G:0.571<br>429  | 60 | A:0.1          | G:0.9           | 2.70<br>0 | 0.2<br>16 | 0.4<br>94 | 0.1<br>83 |



|       |            |                |                   |     |                |                |    |                |                |           |           |           |           |
|-------|------------|----------------|-------------------|-----|----------------|----------------|----|----------------|----------------|-----------|-----------|-----------|-----------|
| chr15 | 3622<br>13 | intron_variant | c.1709-<br>333T>G | 112 | A:0.36<br>6071 | C:0.633<br>929 | 60 | A:0.1          | C:0.9          | 2.55<br>8 | 0.1<br>57 | 0.4<br>68 | 0.1<br>83 |
| chr15 | 3622<br>26 | intron_variant | c.1709-<br>346G>A | 112 | C:0.57<br>1429 | T:0.428<br>571 | 60 | C:0.883<br>333 | T:0.116<br>667 | 2.35<br>8 | 0.1<br>95 | 0.4<br>94 | 0.2<br>10 |
| chr15 | 3624<br>60 | intron_variant | c.1709-<br>580T>C | 112 | A:0.46<br>4286 | G:0.535<br>714 | 60 | A:0.166<br>667 | G:0.833<br>333 | 1.77<br>7 | 0.1<br>70 | 0.5<br>02 | 0.2<br>82 |
| chr15 | 3624<br>81 | intron_variant | c.1709-<br>601G>A | 112 | C:0.83<br>9286 | T:0.160<br>714 | 60 | C:0.316<br>667 | T:0.683<br>333 | 0.61<br>8 | 0.4<br>47 | 0.2<br>72 | 0.4<br>40 |
| chr15 | 3625<br>25 | intron_variant | c.1709-<br>645C>T | 112 | G:0.46<br>4286 | A:0.535<br>714 | 60 | G:0.183<br>333 | A:0.816<br>667 | 1.64<br>8 | 0.1<br>52 | 0.5<br>02 | 0.3<br>05 |
| chr15 | 3625<br>50 | intron_variant | c.1709-<br>670G>T | 112 | C:0.85<br>7143 | A:0.142<br>857 | 60 | C:1            | A:0            | ###<br>#  | 0.1<br>04 | 0.2<br>47 | 0.0<br>00 |
| chr15 | 3625<br>78 | intron_variant | c.1709-<br>698G>A | 110 | C:0.6          | T:0.4          | 60 | C:0.866<br>667 | T:0.133<br>333 | 2.06<br>1 | 0.1<br>49 | 0.4<br>84 | 0.2<br>35 |
| chr15 | 3625<br>84 | intron_variant | c.1709-<br>704A>G | 112 | T:0.53<br>5714 | C:0.464<br>286 | 60 | T:0.833<br>333 | C:0.166<br>667 | 1.77<br>7 | 0.1<br>70 | 0.5<br>02 | 0.2<br>82 |
| chr15 | 3627<br>81 | intron_variant | c.1709-<br>901A>G | 112 | T:0.42<br>8571 | C:0.571<br>429 | 60 | T:0.116<br>667 | C:0.883<br>333 | 2.35<br>8 | 0.1<br>95 | 0.4<br>94 | 0.2<br>10 |
| chr15 | 3629<br>39 | intron_variant | c.1709-1059A>G    | 112 | T:0.42<br>8571 | C:0.571<br>429 | 60 | T:0.116<br>667 | C:0.883<br>333 | 2.35<br>8 | 0.1<br>95 | 0.4<br>94 | 0.2<br>10 |
| chr15 | 3630<br>42 | intron_variant | c.1708+1098A>C    | 112 | T:0.86<br>6071 | G:0.133<br>929 | 60 | T:0.95         | G:0.05         | 2.42<br>3 | 0.0<br>26 | 0.2<br>34 | 0.0<br>97 |
| chr15 | 3632<br>44 | intron_variant | c.1708+89<br>6T>C | 112 | A:0.42<br>8571 | G:0.571<br>429 | 60 | A:0.116<br>667 | G:0.883<br>333 | 2.35<br>8 | 0.1<br>95 | 0.4<br>94 | 0.2<br>10 |

|       |            |                |                   |     |                |                |    |                 |                 |           |           |           |           |
|-------|------------|----------------|-------------------|-----|----------------|----------------|----|-----------------|-----------------|-----------|-----------|-----------|-----------|
| chr15 | 3632<br>65 | intron_variant | c.1708+87<br>5A>G | 112 | T:0.42<br>8571 | C:0.571<br>429 | 60 | T:0.116<br>667  | C:0.883<br>333  | 2.35<br>8 | 0.1<br>95 | 0.4<br>94 | 0.2<br>10 |
| chr15 | 3638<br>91 | intron_variant | c.1708+24<br>9G>A | 110 | C:0.88<br>1818 | T:0.118<br>182 | 60 | C:0.366<br>667  | T:0.633<br>333  | 0.44<br>5 | 0.4<br>60 | 0.2<br>10 | 0.4<br>72 |
| chr15 | 3639<br>19 | intron_variant | c.1708+22<br>1C>G | 112 | G:0.87<br>5    | C:0.125        | 60 | G:0.383<br>333  | C:0.616<br>667  | 0.45<br>9 | 0.4<br>30 | 0.2<br>21 | 0.4<br>81 |
| chr15 | 3639<br>60 | intron_variant | c.1708+18<br>0T>C | 112 | A:0.76<br>7857 | G:0.232<br>143 | 60 | A:0.966<br>667  | G:0.033<br>3333 | 5.48<br>9 | 0.1<br>26 | 0.3<br>60 | 0.0<br>66 |
| chr15 | 3639<br>61 | intron_variant | c.1708+17<br>9T>C | 112 | A:0.42<br>8571 | G:0.571<br>429 | 60 | A:0.116<br>667  | G:0.883<br>333  | 2.35<br>8 | 0.1<br>95 | 0.4<br>94 | 0.2<br>10 |
| chr15 | 3641<br>22 | intron_variant | c.1708+18<br>G>T  | 112 | C:0.46<br>4286 | A:0.535<br>714 | 60 | C:0.166<br>667  | A:0.833<br>333  | 1.77<br>7 | 0.1<br>70 | 0.5<br>02 | 0.2<br>82 |
| chr15 | 3644<br>56 | intron_variant | c.1592-<br>200C>T | 112 | G:0.57<br>1429 | A:0.428<br>571 | 60 | G:0.883<br>333  | A:0.116<br>667  | 2.35<br>8 | 0.1<br>95 | 0.4<br>94 | 0.2<br>10 |
| chr15 | 3644<br>86 | intron_variant | c.1592-<br>230T>C | 112 | A:0.42<br>8571 | G:0.571<br>429 | 58 | A:0.086<br>2069 | G:0.913<br>793  | 3.08<br>3 | 0.2<br>34 | 0.4<br>94 | 0.1<br>60 |
| chr15 | 3646<br>07 | intron_variant | c.1592-<br>351A>G | 112 | T:0.36<br>6071 | C:0.633<br>929 | 60 | T:0.1<br>667    | C:0.9<br>333    | 2.55<br>8 | 0.1<br>57 | 0.4<br>68 | 0.1<br>83 |
| chr15 | 3646<br>13 | intron_variant | c.1592-<br>357A>G | 112 | T:0.42<br>8571 | C:0.571<br>429 | 60 | T:0.116<br>667  | C:0.883<br>333  | 2.35<br>8 | 0.1<br>95 | 0.4<br>94 | 0.2<br>10 |
| chr15 | 3646<br>73 | intron_variant | c.1592-<br>417A>G | 112 | T:0.36<br>6071 | C:0.633<br>929 | 60 | T:0.1<br>667    | C:0.9<br>333    | 2.55<br>8 | 0.1<br>57 | 0.4<br>68 | 0.1<br>83 |
| chr15 | 3647<br>31 | intron_variant | c.1592-<br>475A>G | 112 | T:0.42<br>8571 | C:0.571<br>429 | 60 | T:0.116<br>667  | C:0.883<br>333  | 2.35<br>8 | 0.1<br>95 | 0.4<br>94 | 0.2<br>10 |

---

|       |            |                  |                   |                 |                |                |                |                 |                |                |           |           |           |           |
|-------|------------|------------------|-------------------|-----------------|----------------|----------------|----------------|-----------------|----------------|----------------|-----------|-----------|-----------|-----------|
| chr15 | 3648<br>29 | intron_variant   | c.1591+50<br>8T>C | 112             | A:0.46<br>4286 | G:0.535<br>714 | 60             | A:0.15          | G:0.85         | 1.93<br>6      | 0.1<br>90 | 0.5<br>02 | 0.2<br>59 |           |
| chr15 | 3648<br>37 | intron_variant   | c.1591+50<br>0A>G | 112             | T:0.42<br>8571 | C:0.571<br>429 | 60             | T:0.116<br>667  | C:0.883<br>333 | 2.35<br>8      | 0.1<br>95 | 0.4<br>94 | 0.2<br>10 |           |
| chr15 | 3648<br>59 | intron_variant   | c.1591+47<br>8T>G | 112             | A:0.86<br>6071 | C:0.133<br>929 | 60             | A:0.95          | C:0.05         | 2.42<br>3      | 0.0<br>26 | 0.2<br>34 | 0.0<br>97 |           |
| chr15 | 3648<br>82 | intron_variant   | c.1591+45<br>5C>T | 112             | G:0.31<br>25   | A:0.687<br>5   | 60             | G:0.033<br>3333 | A:0.966<br>667 | 6.61<br>6      | 0.1<br>99 | 0.4<br>34 | 0.0<br>66 |           |
| chr15 | 3649<br>92 | intron_variant   | c.1591+34<br>5G>A | 112             | C:0.5          | T:0.5          | 60             | C:0.366<br>667  | T:0.633<br>333 | 1.06<br>8      | 0.0<br>33 | 0.5<br>05 | 0.4<br>72 |           |
| chr15 | 3650<br>48 | intron_variant   | c.1591+28<br>9G>A | 110             | C:0.64<br>5455 | T:0.354<br>545 | 60             | C:0.9           | T:0.1          | 2.52<br>3      | 0.1<br>47 | 0.4<br>62 | 0.1<br>83 |           |
| chr15 | 3651<br>81 | intron_variant   | c.1591+15<br>6T>C | 112             | A:0.42<br>8571 | G:0.571<br>429 | 60             | A:0.133<br>333  | G:0.866<br>667 | 2.10<br>3      | 0.1<br>75 | 0.4<br>94 | 0.2<br>35 |           |
| chr15 | 3652<br>69 | intron_variant   | c.1591+68<br>C>T  | 112             | G:0.83<br>9286 | A:0.160<br>714 | 60             | G:0.333<br>333  | A:0.666<br>667 | 0.60<br>2      | 0.4<br>28 | 0.2<br>72 | 0.4<br>52 |           |
| chr15 | 3652<br>74 | intron_variant   | c.1591+63<br>G>A  | 112             | C:0.46<br>4286 | T:0.535<br>714 | 60             | C:0.2           | T:0.8          | 1.54<br>2      | 0.1<br>34 | 0.5<br>02 | 0.3<br>25 |           |
| chr15 | 3652<br>79 | intron_variant   | c.1591+58<br>G>A  | 112             | C:0.57<br>1429 | T:0.428<br>571 | 60             | C:0.883<br>333  | T:0.116<br>667 | 2.35<br>8      | 0.1<br>95 | 0.4<br>94 | 0.2<br>10 |           |
| chr15 | 3653<br>19 | intron_variant   | c.1591+18<br>G>A  | 112             | C:0.46<br>4286 | T:0.535<br>714 | 60             | C:0.166<br>667  | T:0.833<br>333 | 1.77<br>7      | 0.1<br>70 | 0.5<br>02 | 0.2<br>82 |           |
| chr15 | 3654<br>59 | missense_variant | c.1469C><br>T     | p.Pro490<br>Leu | 112            | G:0.42<br>8571 | A:0.571<br>429 | 60              | G:0.116<br>667 | A:0.883<br>333 | 2.35<br>8 | 0.1<br>95 | 0.4<br>94 | 0.2<br>10 |

|       |            |                                          |                   |                 |     |                |                 |    |                |                 |           |           |           |           |
|-------|------------|------------------------------------------|-------------------|-----------------|-----|----------------|-----------------|----|----------------|-----------------|-----------|-----------|-----------|-----------|
| chr15 | 3655<br>00 | synonymous_variant                       | c.1428T><br>C     | p.Asn47<br>6Asn | 112 | A:0.41<br>0714 | G:0.589<br>286  | 60 | A:0.15         | G:0.85          | 1.88<br>3 | 0.1<br>39 | 0.4<br>88 | 0.2<br>59 |
| chr15 | 3655<br>76 | intron_variant                           | c.1376-<br>24T>C  |                 | 112 | A:0.42<br>8571 | G:0.571<br>429  | 60 | A:0.116<br>667 | G:0.883<br>333  | 2.35<br>8 | 0.1<br>95 | 0.4<br>94 | 0.2<br>10 |
| chr15 | 3656<br>22 | intron_variant                           | c.1375+23<br>T>C  |                 | 112 | A:0.56<br>25   | G:0.437<br>5    | 60 | A:0.133<br>333 | G:0.866<br>667  | 2.11<br>3 | 0.3<br>07 | 0.4<br>97 | 0.2<br>35 |
| chr15 | 3663<br>19 | intron_variant                           | c.1250-<br>45A>C  |                 | 110 | T:0.85<br>4545 | G:0.145<br>455  | 60 | T:0.45         | G:0.55          | 0.49<br>8 | 0.3<br>19 | 0.2<br>51 | 0.5<br>03 |
| chr15 | 3668<br>55 | intron_variant                           | c.1114-<br>57A>G  |                 | 112 | T:0.42<br>8571 | C:0.571<br>429  | 60 | T:0.1          | C:0.9           | 2.70<br>0 | 0.2<br>17 | 0.4<br>94 | 0.1<br>83 |
| chr15 | 3668<br>57 | intron_variant                           | c.1114-<br>59C>T  |                 | 112 | G:0.47<br>3214 | A:0.526<br>786  | 60 | G:0.25         | A:0.75          | 1.31<br>9 | 0.0<br>95 | 0.5<br>03 | 0.3<br>81 |
| chr15 | 3669<br>40 | stop_gained                              | c.1090C><br>T     | p.Gln364<br>*   | 112 | G:0.42<br>8571 | A:0.571<br>429  | 60 | G:0.116<br>667 | A:0.883<br>333  | 2.35<br>8 | 0.1<br>95 | 0.4<br>94 | 0.2<br>10 |
| chr15 | 3669<br>60 | splice_region_variant&<br>intron_variant | c.1075-<br>5A>G   |                 | 112 | T:0.42<br>8571 | C:0.571<br>429  | 60 | T:0.1          | C:0.9           | 2.70<br>0 | 0.2<br>16 | 0.4<br>94 | 0.1<br>83 |
| chr15 | 3669<br>88 | intron_variant                           | c.1075-<br>33C>T  |                 | 112 | G:0.91<br>0714 | A:0.089<br>2857 | 60 | G:0.966<br>667 | A:0.033<br>3333 | 2.50<br>4 | 0.0<br>12 | 0.1<br>64 | 0.0<br>66 |
| chr15 | 3670<br>70 | intron_variant                           | c.1075-<br>115G>A |                 | 112 | C:0.46<br>4286 | T:0.535<br>714  | 60 | C:0.166<br>667 | T:0.833<br>333  | 1.77<br>7 | 0.1<br>70 | 0.5<br>02 | 0.2<br>82 |
| chr15 | 3671<br>26 | intron_variant                           | c.1075-<br>171A>G |                 | 112 | T:0.53<br>5714 | C:0.464<br>286  | 58 | T:0.827<br>586 | C:0.172<br>414  | 1.72<br>9 | 0.1<br>63 | 0.5<br>02 | 0.2<br>90 |
| chr15 | 3672<br>79 | intron_variant                           | c.1075-<br>324T>C |                 | 112 | A:0.46<br>4286 | G:0.535<br>714  | 58 | A:0.189<br>655 | G:0.810<br>345  | 1.60<br>5 | 0.1<br>45 | 0.5<br>02 | 0.3<br>13 |

|       |            |                |                   |     |                |                 |    |                 |                 |           |           |           |           |
|-------|------------|----------------|-------------------|-----|----------------|-----------------|----|-----------------|-----------------|-----------|-----------|-----------|-----------|
| chr15 | 3673<br>07 | intron_variant | c.1075-<br>352A>G | 112 | T:0.42<br>8571 | C:0.571<br>429  | 60 | T:0.116<br>667  | C:0.883<br>333  | 2.35<br>8 | 0.1<br>95 | 0.4<br>94 | 0.2<br>10 |
| chr15 | 3675<br>55 | intron_variant | c.1075-<br>600G>C | 112 | C:0.86<br>6071 | G:0.133<br>929  | 60 | C:0.95          | G:0.05          | 2.42<br>3 | 0.0<br>26 | 0.2<br>34 | 0.0<br>97 |
| chr15 | 3676<br>12 | intron_variant | c.1075-<br>657A>T | 112 | T:0.86<br>6071 | A:0.133<br>929  | 60 | T:0.983<br>333  | A:0.016<br>6667 | 7.02<br>2 | 0.0<br>68 | 0.2<br>34 | 0.0<br>33 |
| chr15 | 3676<br>97 | intron_variant | c.1075-<br>742C>T | 112 | G:0.76<br>7857 | A:0.232<br>143  | 60 | G:0.966<br>667  | A:0.033<br>3333 | 5.48<br>9 | 0.1<br>26 | 0.3<br>60 | 0.0<br>66 |
| chr15 | 3677<br>15 | intron_variant | c.1075-<br>760G>A | 112 | C:0.76<br>7857 | T:0.232<br>143  | 60 | C:0.966<br>667  | T:0.033<br>3333 | 5.48<br>9 | 0.1<br>26 | 0.3<br>60 | 0.0<br>66 |
| chr15 | 3680<br>16 | intron_variant | c.1075-1061G>T    | 110 | C:0.95<br>4545 | A:0.045<br>4545 | 60 | C:1             | A:0             | ###<br>#  | 0.0<br>23 | 0.0<br>88 | 0.0<br>00 |
| chr15 | 3680<br>28 | intron_variant | c.1075-1073T>C    | 110 | A:0.95<br>4545 | G:0.045<br>4545 | 60 | A:1             | G:0             | ###<br>#  | 0.0<br>23 | 0.0<br>88 | 0.0<br>00 |
| chr15 | 3680<br>42 | intron_variant | c.1075-1087A>G    | 112 | T:0.31<br>25   | C:0.687<br>5    | 60 | T:0.05          | C:0.95          | 4.48<br>8 | 0.1<br>74 | 0.4<br>34 | 0.0<br>97 |
| chr15 | 3680<br>44 | intron_variant | c.1075-1089C>T    | 112 | G:0.85<br>7143 | A:0.142<br>857  | 60 | G:1             | A:0             | ###<br>#  | 0.1<br>04 | 0.2<br>47 | 0.0<br>00 |
| chr15 | 3681<br>17 | intron_variant | c.1074+1118A>G    | 112 | T:0.42<br>8571 | C:0.571<br>429  | 58 | T:0.086<br>2069 | C:0.913<br>793  | 3.08<br>3 | 0.2<br>34 | 0.4<br>94 | 0.1<br>60 |
| chr15 | 3682<br>81 | intron_variant | c.1074+95<br>4C>A | 112 | G:0.85<br>7143 | T:0.142<br>857  | 60 | G:1             | T:0             | ###<br>#  | 0.1<br>04 | 0.2<br>47 | 0.0<br>00 |
| chr15 | 3684<br>79 | intron_variant | c.1074+75<br>6C>A | 112 | G:0.93<br>75   | T:0.062<br>5    | 60 | G:1             | T:0             | ###<br>#  | 0.0<br>37 | 0.1<br>18 | 0.0<br>00 |

|       |            |                    |                   |                 |                |                 |                 |                |                 |           |           |           |           |           |
|-------|------------|--------------------|-------------------|-----------------|----------------|-----------------|-----------------|----------------|-----------------|-----------|-----------|-----------|-----------|-----------|
| chr15 | 3684<br>92 | intron_variant     | c.1074+74<br>3T>C | 112             | A:0.42<br>8571 | G:0.571<br>429  | 58              | A:0.103<br>448 | G:0.896<br>552  | 2.61<br>8 | 0.2<br>11 | 0.4<br>94 | 0.1<br>89 |           |
| chr15 | 3686<br>05 | intron_variant     | c.1074+63<br>0G>C | 112             | C:0.85<br>7143 | G:0.142<br>857  | 60              | C:1            | G:0             | ###<br>#  | 0.1<br>04 | 0.2<br>47 | 0.0<br>00 |           |
| chr15 | 3686<br>34 | intron_variant     | c.1074+60<br>1A>G | 112             | T:0.57<br>1429 | C:0.428<br>571  | 60              | T:0.883<br>333 | C:0.116<br>667  | 2.35<br>8 | 0.1<br>95 | 0.4<br>94 | 0.2<br>10 |           |
| chr15 | 3688<br>10 | intron_variant     | c.1074+42<br>5T>C | 112             | A:0.53<br>5714 | G:0.464<br>286  | 60              | A:0.833<br>333 | G:0.166<br>667  | 1.77<br>7 | 0.1<br>70 | 0.5<br>02 | 0.2<br>82 |           |
| chr15 | 3696<br>05 | intron_variant     | c.924+29<br>G>A   | 112             | C:0.91<br>0714 | T:0.089<br>2857 | 60              | C:0.966<br>667 | T:0.033<br>3333 | 2.50<br>4 | 0.0<br>12 | 0.1<br>64 | 0.0<br>66 |           |
| chr15 | 3698<br>63 | missense_variant   | c.829G>A          | p.Gly277<br>Ser | 112            | C:0.83<br>9286  | T:0.160<br>714  | 60             | C:0.3           | T:0.7     | 0.63<br>7 | 0.4<br>66 | 0.2<br>72 | 0.4<br>27 |
| chr15 | 3700<br>07 | missense_variant   | c.685T>A          | p.Cys229<br>Ser | 112            | A:0.94<br>6429  | T:0.053<br>5714 | 60             | A:1             | T:0       | ###<br>#  | 0.0<br>30 | 0.1<br>02 | 0.0<br>00 |
| chr15 | 3700<br>15 | missense_variant   | c.677G>A          | p.Cys226<br>Tyr | 112            | C:0.94<br>6429  | T:0.053<br>5714 | 60             | C:1             | T:0       | ###<br>#  | 0.0<br>30 | 0.1<br>02 | 0.0<br>00 |
| chr15 | 3700<br>32 | synonymous_variant | c.660A>G          | p.Leu220<br>Leu | 112            | T:0.94<br>6429  | C:0.053<br>5714 | 60             | T:1             | C:0       | ###<br>#  | 0.0<br>30 | 0.1<br>02 | 0.0<br>00 |
| chr15 | 3700<br>53 | intron_variant     | c.654-<br>15A>T   |                 | 112            | T:0.93<br>75    | A:0.062<br>5    | 60             | T:1             | A:0       | ###<br>#  | 0.0<br>37 | 0.1<br>18 | 0.0<br>00 |
| chr15 | 3700<br>57 | intron_variant     | c.654-<br>19G>A   |                 | 112            | C:0.93<br>75    | T:0.062<br>5    | 60             | C:1             | T:0       | ###<br>#  | 0.0<br>37 | 0.1<br>18 | 0.0<br>00 |
| chr15 | 3700<br>62 | intron_variant     | c.654-<br>24G>T   |                 | 112            | C:0.96<br>4286  | A:0.035<br>7143 | 60             | C:1             | A:0       | ###<br>#  | 0.0<br>15 | 0.0<br>69 | 0.0<br>00 |

|       |            |                |                  |     |                |                 |    |                |                 |           |           |           |           |
|-------|------------|----------------|------------------|-----|----------------|-----------------|----|----------------|-----------------|-----------|-----------|-----------|-----------|
| chr15 | 3700<br>98 | intron_variant | c.654-<br>60G>C  | 110 | C:0.94<br>5455 | G:0.054<br>5455 | 60 | C:1            | G:0             | ###<br>#  | 0.0<br>31 | 0.1<br>04 | 0.0<br>00 |
| chr15 | 3701<br>40 | intron_variant | c.654-<br>102A>G | 110 | T:0.94<br>5455 | C:0.054<br>5455 | 60 | T:1            | C:0             | ###<br>#  | 0.0<br>31 | 0.1<br>04 | 0.0<br>00 |
| chr15 | 3701<br>42 | intron_variant | c.654-<br>104C>T | 112 | G:0.94<br>6429 | A:0.053<br>5714 | 60 | G:1            | A:0             | ###<br>#  | 0.0<br>30 | 0.1<br>02 | 0.0<br>00 |
| chr15 | 3702<br>03 | intron_variant | c.654-<br>165T>A | 112 | A:0.93<br>75   | T:0.062<br>5    | 60 | A:1            | T:0             | ###<br>#  | 0.0<br>37 | 0.1<br>18 | 0.0<br>00 |
| chr15 | 3702<br>08 | intron_variant | c.654-<br>170C>T | 112 | G:0.93<br>75   | A:0.062<br>5    | 60 | G:1            | A:0             | ###<br>#  | 0.0<br>37 | 0.1<br>18 | 0.0<br>00 |
| chr15 | 3702<br>23 | intron_variant | c.654-<br>185C>T | 112 | G:0.90<br>1786 | A:0.098<br>2143 | 60 | G:0.966<br>667 | A:0.033<br>3333 | 2.72<br>7 | 0.0<br>18 | 0.1<br>79 | 0.0<br>66 |
| chr15 | 3702<br>27 | intron_variant | c.654-<br>189A>C | 112 | T:0.42<br>8571 | G:0.571<br>429  | 60 | T:0.116<br>667 | G:0.883<br>333  | 2.35<br>8 | 0.1<br>95 | 0.4<br>94 | 0.2<br>10 |
| chr15 | 3702<br>50 | intron_variant | c.654-<br>212T>C | 112 | A:0.93<br>75   | G:0.062<br>5    | 60 | A:1            | G:0             | ###<br>#  | 0.0<br>37 | 0.1<br>18 | 0.0<br>00 |
| chr15 | 3702<br>65 | intron_variant | c.654-<br>227A>G | 112 | T:0.93<br>75   | C:0.062<br>5    | 60 | T:1            | C:0             | ###<br>#  | 0.0<br>37 | 0.1<br>18 | 0.0<br>00 |
| chr15 | 3702<br>66 | intron_variant | c.654-<br>228G>A | 112 | C:0.93<br>75   | T:0.062<br>5    | 60 | C:1            | T:0             | ###<br>#  | 0.0<br>37 | 0.1<br>18 | 0.0<br>00 |
| chr15 | 3703<br>52 | intron_variant | c.654-<br>314C>T | 112 | G:0.85<br>7143 | A:0.142<br>857  | 60 | G:1            | A:0             | ###<br>#  | 0.1<br>04 | 0.2<br>47 | 0.0<br>00 |
| chr15 | 3704<br>90 | intron_variant | c.654-<br>452G>A | 112 | C:0.83<br>0357 | T:0.169<br>643  | 60 | C:0.3          | T:0.7           | 0.66<br>6 | 0.4<br>52 | 0.2<br>84 | 0.4<br>27 |

---

|       |            |                                          |                 |                 |     |                |                 |    |                |                 |           |           |           |           |
|-------|------------|------------------------------------------|-----------------|-----------------|-----|----------------|-----------------|----|----------------|-----------------|-----------|-----------|-----------|-----------|
| chr15 | 3708<br>77 | intron_variant                           | c.653+73<br>C>T |                 | 110 | G:0.46<br>3636 | A:0.536<br>364  | 60 | G:0.183<br>333 | A:0.816<br>667  | 1.64<br>8 | 0.1<br>51 | 0.5<br>02 | 0.3<br>05 |
| chr15 | 3709<br>12 | intron_variant                           | c.653+38<br>T>C |                 | 112 | A:0.42<br>8571 | G:0.571<br>429  | 60 | A:0.116<br>667 | G:0.883<br>333  | 2.35<br>8 | 0.1<br>95 | 0.4<br>94 | 0.2<br>10 |
| chr15 | 3709<br>82 | synonymous_variant                       | c.621A>G        | p.Arg207<br>Arg | 112 | T:0.42<br>8571 | C:0.571<br>429  | 60 | T:0.116<br>667 | C:0.883<br>333  | 2.35<br>8 | 0.1<br>95 | 0.4<br>94 | 0.2<br>10 |
| chr15 | 3710<br>01 | missense_variant                         | c.602C>T        | p.Ala201<br>Val | 112 | G:0.46<br>4286 | A:0.535<br>714  | 60 | G:0.15         | A:0.85          | 1.93<br>6 | 0.1<br>90 | 0.5<br>02 | 0.2<br>59 |
| chr15 | 3710<br>23 | missense_variant                         | c.580A>C        | p.Asn19<br>4His | 112 | T:0.42<br>8571 | G:0.571<br>429  | 60 | T:0.116<br>667 | G:0.883<br>333  | 2.35<br>8 | 0.1<br>95 | 0.4<br>94 | 0.2<br>10 |
| chr15 | 3710<br>37 | missense_variant                         | c.566C>A        | p.Pro189<br>Gln | 112 | G:0.62<br>5    | T:0.375         | 60 | G:0.883<br>333 | T:0.116<br>667  | 2.25<br>6 | 0.1<br>45 | 0.4<br>73 | 0.2<br>10 |
| chr15 | 3710<br>58 | splice_region_variant&<br>intron_variant | c.553-<br>8C>T  |                 | 112 | G:0.96<br>4286 | A:0.035<br>7143 | 60 | G:0.966<br>667 | A:0.033<br>3333 | 1.06<br>0 | -<br>13   | 0.0<br>69 | 0.0<br>66 |
| chr15 | 3714<br>96 | intron_variant                           | c.366+57<br>T>C |                 | 112 | A:0.45<br>5357 | G:0.544<br>643  | 60 | A:0.25         | G:0.75          | 1.31<br>2 | 0.0<br>81 | 0.5<br>00 | 0.3<br>81 |
| chr15 | 3715<br>37 | intron_variant                           | c.366+16<br>T>C |                 | 112 | A:0.42<br>8571 | G:0.571<br>429  | 60 | A:0.116<br>667 | G:0.883<br>333  | 2.35<br>8 | 0.1<br>95 | 0.4<br>94 | 0.2<br>10 |
| chr15 | 3715<br>77 | synonymous_variant                       | c.342G>A        | p.Leu114<br>Leu | 112 | C:0.46<br>4286 | T:0.535<br>714  | 60 | C:0.166<br>667 | T:0.833<br>333  | 1.77<br>7 | 0.1<br>70 | 0.5<br>02 | 0.2<br>82 |
